# Supplementary material
Source: ML conference proceedings conference paper supplement (https://openreview.net/forum?id=W48CPXEpXR)
Supplement: supplementary_material [file additional_human_solutions.xlsx]

## Sheet: Sheet1
ID	Problem	Solvable?	Solution
2005	A treasured ring, small and smooth has fallen behind an unyielding mahogany television cabinet. The cabinet is so heavy to move that even nudging it a bit is impossible. You have a thin plastic bag, an office-grade stapler, a bottle of multi-purpose glue, a large foam pool noodle, a handheld flashlight with a focused beam, and a piece of durable string. The confined space behind the television ca…	No	Unsolvable because none of the items listed are capable of navigating the cord tangled mess behind the immovable cabinet to retrieve the ring.
2013	The ceiling fan in your bedroom is not providing any respite from the summer heat since it's not running. The switch seems to have malfunctioned and won't respond. The fan has five blades, each of them about 2 ft long, with a considerable gap between each blade. You have a feather duster with a short handle, a wooden chair which is old and rickety and cannot safely support your weight, a blender …	No	Unsolvable because the switch has malfunctioned and isn't repairing. There's no way to safely repair it or force it to start with the listed items.
2013	The ceiling fan in your bedroom is not providing any respite from the summer heat since it's not running. The switch seems to have malfunctioned and won't respond. The fan has five blades, each of them about 2 ft long, with a considerable gap between each blade. You have a feather duster with a short handle, a wooden chair which is old and rickety and cannot safely support your weight, a blender …	No	Unsolvable, because none of the items that are provided in the scenario can fix the broken switch on the fan and it needs more precise work done on it will proper tools to solve the issue.
2014	Your bedroom drawer is notoriously stubborn and once again refusing to open. The drawer is fairly large, approximately two feet wide and about six inches high with sleek metal handles. You don't have a screwdriver or a hammer, but you have a small silver padlock with a curved shackle, a slightly wet and grubby dishcloth, an old-fashioned handheld egg beater with two beaters, a tennis shoe, a penn…	No	Unsolvable because the butter knife is too thick to offer leverage to open the drawer, and none of the other listed items can reasonably be used instead.
2035	You need to remove the pit from an avocado for your salad, but your utility knife is blunt. In your drawer, you find a stainless steel egg whisk, a wooden rolling pin, a wine bottle filled with Merlot, a heavy-duty garlic crusher, small plastic spoons, and a fork with prongs bent slightly inwards. Unfortunately, the only spoon available isn't sufficient for the task. How should you proceed to rem…	Yes	Step 1. Use the fork to carefully puncture the avocado's skin and separate it into halves. The cuts will not be perfect, but it can divide the soft flesh of the avocado. Step 2. Use the fork to scoop out the pit. With its slightly bent tines, it's the most suitable item for the task.
2035	You need to remove the pit from an avocado for your salad, but your utility knife is blunt. In your drawer, you find a stainless steel egg whisk, a wooden rolling pin, a wine bottle filled with Merlot, a heavy-duty garlic crusher, small plastic spoons, and a fork with prongs bent slightly inwards. Unfortunately, the only spoon available isn't sufficient for the task. How should you proceed to rem…	Yes	Step 1. Take the fork with the bent prongs and pierce the avocado in an outline around the pit. Step 2. Take the plastic spoon and scoop the avocado pit out.
2040	You're in a remote area - your lighter chooses this time to refuse to spark. You need to start fire for warmth without delay. You have a flathead screwdriver, a small, silver sealed bag of potato chips, a handheld can opener, a transparent, plastic water bottle, a 2-inches diameter magnifying glass, and a newspaper. The magnifying glass, although small, is somewhat compromised since it has a crac…	Yes	Step1: Use the newspaper to create a nest-like structure, ensuring it's dry. Step2: Use the water bottle filled with water, use it as a lens to focus the sunlight onto the newspaper. Step3: Patiently wait and adjust the angle as needed until the newspaper begins to smoke and spark. This is all part of the original solution, but this works. The rest doesnt.
2040	You're in a remote area - your lighter chooses this time to refuse to spark. You need to start fire for warmth without delay. You have a flathead screwdriver, a small, silver sealed bag of potato chips, a handheld can opener, a transparent, plastic water bottle, a 2-inches diameter magnifying glass, and a newspaper. The magnifying glass, although small, is somewhat compromised since it has a crac…	Yes	step 1: cut the news paper into small pieces step 2: rub the screw driver against the can opener to create enough friction to cause a spark and light up the newspaper
2045	As you're trekking through a winding trail, you feel a jerk - your heavy-duty backpack's strap has given way. You need to continue for several miles, so it's critical that the strap is fixed. At your disposal, you have some fresh mint-flavored chewing gum, a clean, empty tuna tin can, an oversized designer scarf, a sharp safety pin, a piece of paracord about one foot long, and a sturdy mountain-c…	Yes	Step 1. Use the paracord to replace the broken section of strap by tying it in place. Step 2. Use the carabiner or safety pin if needed to attach the paracord strap to the backpack, depending on where and how the original strap broke.
2045	As you're trekking through a winding trail, you feel a jerk - your heavy-duty backpack's strap has given way. You need to continue for several miles, so it's critical that the strap is fixed. At your disposal, you have some fresh mint-flavored chewing gum, a clean, empty tuna tin can, an oversized designer scarf, a sharp safety pin, a piece of paracord about one foot long, and a sturdy mountain-c…	Yes	step one : tie the paracord tightly around the area where the strap was broken and safety pinned together step 2: use the safety pin if necessary to secure it further
1485	You want to curl your hair but your hot rollers are misplaced. You have a spray bottle, lotion, chopsticks, old socks, paper towel rolls, and hair gel. The lotion is an ultra-moisturizing one which tends to weigh your hair down rendering curls less effective, and the chopsticks are the disposable type, which are quite thin and offer less surface area for bigger curls. How can you still achieve cu…	No	Unsolvable because the listed items do not offer a way to keep the hair in place, or apply heat. The socks are too thick to tie curls in, with no way to cut them down to a smaller size, and the paper towel rolls are too fragile to serve as curlers.
1485	You want to curl your hair but your hot rollers are misplaced. You have a spray bottle, lotion, chopsticks, old socks, paper towel rolls, and hair gel. The lotion is an ultra-moisturizing one which tends to weigh your hair down rendering curls less effective, and the chopsticks are the disposable type, which are quite thin and offer less surface area for bigger curls. How can you still achieve cu…	Yes	Step1: Wet your hair using the spray bottle. Step2: Apply hair gel evenly. Step3: Roll sections of your hair around chopsticks step 4: use the paper towel to roll around the hair and chopsticks in order to secure it in place Step 5: leave overnight step 6: remove everything the next day to reveal curls
1491	Your hair has turned extremely frisky but your hair serum is empty. You have a plastic wrap (which is very thin and easily torn), mayonnaise, a hair straightener, avocado (which is over-ripened and mushy), a blender, and a hairdryer. However, your blender is broken and you cannot use it and neither the hairdryer nor the straightener can help resolve the problem. How can you make a hair mask to ta…	No	Unsolvable because none of the listed items are capable of containing the ingredients while we mix them. The blender is disallowed and the plastic wrap is too fragile.
1491	Your hair has turned extremely frisky but your hair serum is empty. You have a plastic wrap (which is very thin and easily torn), mayonnaise, a hair straightener, avocado (which is over-ripened and mushy), a blender, and a hairdryer. However, your blender is broken and you cannot use it and neither the hairdryer nor the straightener can help resolve the problem. How can you make a hair mask to ta…	No	unsolvable, because first you can't use the blender thus it's infeasible to make a mixture of avocado and mayonnaise, second the plastic wrap is fragile thus you can't use it to cover your hair, third there is no container listed for you to mix the mayo and the avocado, lastly neither the hairdryer nor the straightener is functional, the problem can't be solved using existing items.
1522	The bell system fails at university, disrupting class scheduling. You have a piano in a music hall nearby, a drum set, a microphone with a limited short-range pick-up, a guitar, a loudspeaker, and a stopwatch. But, the loudspeaker is in a different room than the piano, and both the piano and the stopwatch require electricity to function. How can you create a temporary bell system?	No	Unsolvable because there's no way to make noise at the appropriate times with the listed items in a way that can be heard by everyone.
1522	The bell system fails at university, disrupting class scheduling. You have a piano in a music hall nearby, a drum set, a microphone with a limited short-range pick-up, a guitar, a loudspeaker, and a stopwatch. But, the loudspeaker is in a different room than the piano, and both the piano and the stopwatch require electricity to function. How can you create a temporary bell system?	Yes	step one: bring the microphone and connect it to the loud speaker step 2: place the mic near the drum set step 3: connect the mic and the loud speaker to electricity and turn it on step 4: play the drum set when ever a class section is over so everyone can hear the drum is is loud and can be amplify with the help of the mic for everyone to hear
1541	A tropical storm snaps the tent pole during a jungle camp. Among your belongings, you find a frisbee, a Swiss army knife, a bottle of water, a first aid kit, some shoe laces, a roll of duct tape, and some clothes hangers. However, the clothes hangers are made of a soft material that bends easily, making them unfit for supporting the tent structure. The duct tape is wet from the storm and no longe…	No	Unsolvable. With the items available, there is no way to hold up the tent structure.
1541	A tropical storm snaps the tent pole during a jungle camp. Among your belongings, you find a frisbee, a Swiss army knife, a bottle of water, a first aid kit, some shoe laces, a roll of duct tape, and some clothes hangers. However, the clothes hangers are made of a soft material that bends easily, making them unfit for supporting the tent structure. The duct tape is wet from the storm and no longe…	No	Unsolvable, because none of the items are able to repair the broken tent pole and none of them can be used to make a stable and rigid alternative.
1552	As a school bus driver, your steering got jammed while driving, and it's now very stiff. You find a deflated balloon with weak elasticity, an umbrella with a bent handle, a rubber glove with a small tear, an aerosol can of lubricant but the spray head is missing, a thin roll of paper towels, and a metal straw that is clogged with something sticky and cannot be unclogged. How can you, with these c…	No	Unsolvable because the lubricant is missing its spray head, and nothing suitable is listed to replace it.
1552	As a school bus driver, your steering got jammed while driving, and it's now very stiff. You find a deflated balloon with weak elasticity, an umbrella with a bent handle, a rubber glove with a small tear, an aerosol can of lubricant but the spray head is missing, a thin roll of paper towels, and a metal straw that is clogged with something sticky and cannot be unclogged. How can you, with these c…	Yes	Step1 Wear the rubber gloves for protection. Step2 Open the aerosol can with the metal straw. Step3 Pour the lubricant onto the paper towels. Step4 Wipe the balloon with the lubricant and insert it deep down to the steering wheel with the metal straw to apply the lubricant to the steering mechanism.
1578	You're trying to prune a high shrub, but your shears are broken. You have a round hair tie, thick twine, a small piece of wax paper, a plastic cup with a small chip at the rim, a respectfully sharp kitchen knife with a rubber handle, and a thin wooden stick about 2 feet long. The wooden stick is curved and not sturdy enough to support the weight of the knife. How can you create a tool to trim the…	No	Unsolvable, because none of the items given to you will be able to support the knife and give you the reach to prune the high scrub.
1578	You're trying to prune a high shrub, but your shears are broken. You have a round hair tie, thick twine, a small piece of wax paper, a plastic cup with a small chip at the rim, a respectfully sharp kitchen knife with a rubber handle, and a thin wooden stick about 2 feet long. The wooden stick is curved and not sturdy enough to support the weight of the knife. How can you create a tool to trim the…	No	Unsolvable because the listed items offer no way to reach the shrub and cut it. The stick is unsuitable after the constraints. We lack any way to extend our reach or climb up.
1581	1581 You want to tie up your sprawling climbing roses, but you've run out of soft garden wire. You do have a bundle of bamboo stakes that are a foot long each, a pocket knife with a somewhat dull blade, a box of multi-colored plastic straws that are flexible, a pair of worn-out garden gloves, an empty watering can, and a rusty paperclip. However, the straws are snap easily and the pocket knife is…	No	Unsolvable because none of the listed items are suitable alternatives for garden wire. The straws are brittle, and there's only one paperclip, which is also rusty. We can't make strips out of the garden gloves because the pocket knife is dull.
1581	1581 You want to tie up your sprawling climbing roses, but you've run out of soft garden wire. You do have a bundle of bamboo stakes that are a foot long each, a pocket knife with a somewhat dull blade, a box of multi-colored plastic straws that are flexible, a pair of worn-out garden gloves, an empty watering can, and a rusty paperclip. However, the straws are snap easily and the pocket knife is…	No	Unsolvable, because none of the items can be used to tie the roses except for the straws, but they snap easily so they can't be used.
1584	Your young garden plants are wilting due to drought, but your rubber hose is punctured. You have a pack of superabsorbent water crystals intended for diaper filling, duct tape which has lost its adhesiveness, a thick cellulose sponge for cleaning, a watering can with a narrow spout, a broken sprinkler with damaged valves, and a bucket filled with muddy rainwater. To your disappointment, the duct …	No	Unsolvable because the listed tools offer no way to mix the water crystals into the soil around the plants, or transform the punctured hose into an irrigation system.
1585	You want to propagate a plant cutting with long, delicate roots, but all your pots are occupied. You have a packet of bulky granulated plant food, a small, transparent plastic bag, a blunt steak knife, some flimsy, thin tin foil, a half-litre milk carton, and a fraying gardening string. The problem is, the milk carton is already half-filled with soil and is too small for the size of your plant cu…	No	Unsolvable because the milk carton is too small for the plant cutting, and we have no water. Nothing listed offers a larger alternate pot.
1585	You want to propagate a plant cutting with long, delicate roots, but all your pots are occupied. You have a packet of bulky granulated plant food, a small, transparent plastic bag, a blunt steak knife, some flimsy, thin tin foil, a half-litre milk carton, and a fraying gardening string. The problem is, the milk carton is already half-filled with soil and is too small for the size of your plant cu…	Yes	step 1: put the soil from the milk carton into the plastic bag as its big enough to hold the plant step 2: use the knife to dig out the plant step 3: place the plant into the bag and secure the root under the soil in the bag
1587	You have a dozen petite daffodil bulbs to plant, but your deep planting bowel has cracked. You have a wooden spading fork with loose tines, delicate lace gardening gloves, a bag of chunky cedar mulch, a short watering hose with limited reach, a sturdy stick with rough bark, and an old, rusted ice cream scoop. Your garden soil is as hard as packed clay, and your ice cream scoop is barely scratchin…	No	Unsolvable because none of the listed items are capable of digging in hardened soil. The stick is unsafe to use without gloves capable of protecting our hands, and fork has loose tines.
1591	You want to train your flowering vine to grow around a particular path, but don't have a trellis. You have a small watering can made of galvanized steel, a few pairs of delicate gardening gloves, an old bicycle wheel without a tire, a broken umbrella with a metal skeleton, some rough textured twine, and a tall fiberglass ladder. However, the twine is too short and the bicycle wheel is a bit rusty…	Yes	Step 1. Use the ladder to train the vine by laying or propping it along the desired path, and winding the vine through it.
1591	You want to train your flowering vine to grow around a particular path, but don't have a trellis. You have a small watering can made of galvanized steel, a few pairs of delicate gardening gloves, an old bicycle wheel without a tire, a broken umbrella with a metal skeleton, some rough textured twine, and a tall fiberglass ladder. However, the twine is too short and the bicycle wheel is a bit rusty…	Yes	Use the ladder as a makeshift trellis, to provide a frame for the plant to grow onto.
1597	You need to punch holes in copies of your assignment to file them in different ring binders but you don't own a hole puncher. What you do have is a roughly hewn piece of circular wood, a sleek sharp mechanical pencil with a brittle lead, a frayed end roll of duct tape, a jam-prone stapler, a pair of safety scissors with a dull blade, and a rubberized fiberglass hammer. Sadly, the pencil's lead is…	Yes	step 1. Lay the papers next to the rings of the binder step 2. Mark the place where u want to puncture the holes by using the pencil. step 3. using one the scissor blades or both to poke holes onto the marked area. step 2. layer the stack of papers together and put them into the ring binder.
1597	You need to punch holes in copies of your assignment to file them in different ring binders but you don't own a hole puncher. What you do have is a roughly hewn piece of circular wood, a sleek sharp mechanical pencil with a brittle lead, a frayed end roll of duct tape, a jam-prone stapler, a pair of safety scissors with a dull blade, and a rubberized fiberglass hammer. Sadly, the pencil's lead is…	Yes	Step 1. Gather all the papers that need holes. Step 2. Mark the positions of the papers where the holes will go with your mechanical pencil. Step 3. Take the papers in your hand and jam the pencil through the mark you made. Step 4. Repeat the process for the other holes.
1598	You're required to submit a mural painting for your art class, but your palette of paints is completely depleted. You do have resources like a blender, a bottle of pitch-black ink, a pair of corroded scissors, an old, brittle newspaper, a bag of non-rising flour, and a vintage set of food coloring in faint hues. Unfortunately, the food coloring fails to exhibit vibrant colors and the blender is o…	Yes	Use the food coloring and black ink. Mix a few drops of the black ink in the food coloring to make colors that are more vibrant than the original colors. Use this "paint" in your mural. (Will this work? I don't actually know, but I'd try it in a pinch)
1598	You're required to submit a mural painting for your art class, but your palette of paints is completely depleted. You do have resources like a blender, a bottle of pitch-black ink, a pair of corroded scissors, an old, brittle newspaper, a bag of non-rising flour, and a vintage set of food coloring in faint hues. Unfortunately, the food coloring fails to exhibit vibrant colors and the blender is o…	No	Unsolvable because the constraints render the listed items unsuitable.
1604	You need to fix a crooked picture hanging on a 10-foot high office wall, but the telescopic office ladder is unavailable. You have a small, dull pencil, a handheld broom with tightly packed bristles, resilient duct tape, a swivel chair with unsteady wheels, a cracked plastic cup, a roll of soft paper towels and an old, water-damaged textbook. Unfortunately, the broom is too short to reach the ele…	No	Unsolvable, because none of the items provided will give you enough height or reach to fix the picture in a safe manner.
1604	You need to fix a crooked picture hanging on a 10-foot high office wall, but the telescopic office ladder is unavailable. You have a small, dull pencil, a handheld broom with tightly packed bristles, resilient duct tape, a swivel chair with unsteady wheels, a cracked plastic cup, a roll of soft paper towels and an old, water-damaged textbook. Unfortunately, the broom is too short to reach the ele…	No	Unsolvable because there's no safe way to climb to reach the picture, and nothing suitable to extend our reach to adjust it. the broom is too short and the chair is unsafe to stand on.
1607	You need to send a hand-written letter using faded blue paper, but your renowned-brand ink pen has exhausted all its ink. You only have a single twisted paperclip, a pastel pink pencil, a slow-burning candle, a ballpoint pen without ink, a bent plastic ruler, and a hand-cranked sharpener. However, the soft colored pencil fails to produce any dark marks. How do you make the written letter legible …	No	Unsolvable because the colored pencil is too light to be legible, and none of the other listed items can serve as a writing utensil.
1607	You need to send a hand-written letter using faded blue paper, but your renowned-brand ink pen has exhausted all its ink. You only have a single twisted paperclip, a pastel pink pencil, a slow-burning candle, a ballpoint pen without ink, a bent plastic ruler, and a hand-cranked sharpener. However, the soft colored pencil fails to produce any dark marks. How do you make the written letter legible …	Yes	Use the candle to burn the lead of the pencil, darkening it. Use the darkened pencil lead to write your letter in a darker color than the original pink.
1610	The specialty battery compartment screw in your office's antique wall clock has been stripped, making it difficult to replace the batteries. The only resources you have at your disposal are a bendy plastic drinking straw, a blunt butter knife, a half-used tape dispenser with just enough tape to seal an envelope, an unbent paperclip, a small commemorative coin that's too large to fit into the scre…	No	Unsolvable, because none of the items provided can remove the screw or act as a makeshift screwdriver so there is no way to replace the batteries without damaging the clock.
1610	The specialty battery compartment screw in your office's antique wall clock has been stripped, making it difficult to replace the batteries. The only resources you have at your disposal are a bendy plastic drinking straw, a blunt butter knife, a half-used tape dispenser with just enough tape to seal an envelope, an unbent paperclip, a small commemorative coin that's too large to fit into the scre…	Yes	Step1: Use the paperclip as a makeshift screwdriver by bending it into a u shape small enough to fit into the screw, bending the other end to give leverage for turning. Step2: Use the rubber band to cover the stripped screw head. Step3: Use the makeshift paperclip screwdriver on top of the rubber band to press into the screw slot. Step4: Apply pressure to unscrew the screw.
1613	You need to display a sign on a high lamp post on a city street, but you don't have a ladder or any suitable adhesive. You do have a broken pencil with no eraser left, a non-sticky Post-it note which can't hold weight by itself, a flimsy broom with uneven bristles, a piece of chewing gum that hardens quickly, a hook-shaped coat hanger made of thin wire, and duct tape that's not sticky due to the …	No	Unsolvable, because none of the tools or items provided can give you the height, reach, or material to keep the sign up on the lamp post.
1613	You need to display a sign on a high lamp post on a city street, but you don't have a ladder or any suitable adhesive. You do have a broken pencil with no eraser left, a non-sticky Post-it note which can't hold weight by itself, a flimsy broom with uneven bristles, a piece of chewing gum that hardens quickly, a hook-shaped coat hanger made of thin wire, and duct tape that's not sticky due to the …	Yes	Step 1. Use the duct tape to make a strap long enough to go around the lamppost. This use doesn't depend on the stickiness of the tape. Step 2. Use the chewing gum, divided into two pieces, to attach the duct tape strap to itself around the post, and to the sign. Step 3. Use your hands to hold everything tightly in place while the gum hardens. Step 4. Use the coat hanger to carefully nudge the si…
1615	You spot a valuable small, slimy lost item in an unreachable narrow vent at the sidewalk. You have a tapemeasure that recoils quickly, a sticky putty that loses its stickiness fast, a small facial mirror with a broken handle, a selfie stick which only extends up to 6 inches, a small piece of candy and a non-functional flashlight whose brightness can't be adjusted at all. How can you retrieve it?	No	Unsolvable. There's nothing that can reach it firmly enough to grab it.
1615	You spot a valuable small, slimy lost item in an unreachable narrow vent at the sidewalk. You have a tapemeasure that recoils quickly, a sticky putty that loses its stickiness fast, a small facial mirror with a broken handle, a selfie stick which only extends up to 6 inches, a small piece of candy and a non-functional flashlight whose brightness can't be adjusted at all. How can you retrieve it?	No	Unsolvable, because none of the items given in the scenario have the ability to grasp and hold the slimy item as it was being pulled up even if it could be reached.
1624	While camping, you notice your tent has a small but perfectly round hole. You have a thin, translucent plastic bag which has a few small pinhole tears, a metallic thermal blanket that's bulky and doesn’t fold easily, some watery insect repellent, a small, lightweight plastic shovel, a large, heavy-duty flashlight, and a short strip of duct tape with a dirty, hence less adhesive, backside. How wou…	No	Unsolvable because none of the listed items can serve as a patch or adhesive, given the constraints. The plastic bag has tears and the duct tape is compromised. The metallic blanket and plastic shovel might have been used, despite their awkward shapes, but they cannot be held in place.
1624	While camping, you notice your tent has a small but perfectly round hole. You have a thin, translucent plastic bag which has a few small pinhole tears, a metallic thermal blanket that's bulky and doesn’t fold easily, some watery insect repellent, a small, lightweight plastic shovel, a large, heavy-duty flashlight, and a short strip of duct tape with a dirty, hence less adhesive, backside. How wou…	Yes	Step1 Cut the plastic bag into a circle larger than the hole on the tent. Step2 Apply the watery insect repellent over the edge of the hole. Step3 Push the plastic piece over the hole and use the repellent for adhesive. Step4 Move the blanket over the hole from inside and put the flashlight against to hold it steady.
1631	There's a heavy, ornate picture you've been wanting to hang up, but unfortunately, your regular hammer is out of sight. You have a streamlined, metal clothes hanger, a sturdy, flathead screwdriver, a delicate, porcelain dinner plate, a rubber-soled running shoe, a large paddle hairbrush, and a thick, antique hardcover book. However, the book may crumble under the stress of being used to bang a na…	No	Unsolvable, because none of the items or tools that were provided will be able to have enough striking force to replace the hammer so you can't hang the picture without something hard and heavy.
1631	There's a heavy, ornate picture you've been wanting to hang up, but unfortunately, your regular hammer is out of sight. You have a streamlined, metal clothes hanger, a sturdy, flathead screwdriver, a delicate, porcelain dinner plate, a rubber-soled running shoe, a large paddle hairbrush, and a thick, antique hardcover book. However, the book may crumble under the stress of being used to bang a na…	No	Unsolvable because the listed items aren't capable of serving as a makeshift hammer. The book is too fragile. The other items are the wrong shape and not hefty enough to drive a nail.
1632	You noticed a persistent, musty smell in your room and would like to freshen it up, but your electric oil diffuser is out of commission. In your possession are a single, fresh mint tea bag, a small, shallow stainless-steel pot, a ripe, juicy orange, a rainbow-colored, scratch-free compact disc, a liter of distilled water, a worn, cotton sock, and some powdery cinnamon. Yet the pot can't boil larg…	Yes	Step1 Mix the leaves in the teabag with the cinnamon powders. Step2 Use the pot to boil water and put the mixture of leaves and powders in it. Step3 Use the disc to slice the orange and wrap orange slices with the sock. Step4 Put the sock in the pot to dampen it then hang it in the room. Step5 Once the sock dries in the air, put it back in the pot to dampen it again.
1632	You noticed a persistent, musty smell in your room and would like to freshen it up, but your electric oil diffuser is out of commission. In your possession are a single, fresh mint tea bag, a small, shallow stainless-steel pot, a ripe, juicy orange, a rainbow-colored, scratch-free compact disc, a liter of distilled water, a worn, cotton sock, and some powdery cinnamon. Yet the pot can't boil larg…	No	Unsolvable because the listed items cannot provide a continuous scent. There's no heat source to keep the pot at a low simmer, and the pot is constrained. The cinnamon, orange, and mint are potential scents, but they would only work for a limited time.
1633	A kitchen wall hinge has come loose and you do not have a screwdriver. You do have a plastic fork, a small and worn penny, a pair of rusty pliers, a thick paper clip, a blunt butter knife, and a heavy iron frying pan. However, the hinge screw is a deep-set Philips-head, which cannot be operated with a straight edge like a butter knife, and has a tiny slotted end that is smaller than the diameter …	No	Unsolvable as it mention in the constraint that the screw has a tiny slotted end that nothing in the tools can really fit. The paper clip is thick so I reckon it could not fit as well. In addition the paper clip might be too malleable to tighten the screw.
1633	A kitchen wall hinge has come loose and you do not have a screwdriver. You do have a plastic fork, a small and worn penny, a pair of rusty pliers, a thick paper clip, a blunt butter knife, and a heavy iron frying pan. However, the hinge screw is a deep-set Philips-head, which cannot be operated with a straight edge like a butter knife, and has a tiny slotted end that is smaller than the diameter …	No	Unsolvable. There is nothing available that can fit into the screw firmly enough to turn it.
1641	You are alone on a silent, snowy road, and your car is stuck in a ditch with 2 feet of snow. You have a dim flashlight with dwindling battery, a pair of gloves soaked and freezing, a torn umbrella, a bag of hardened clumping cat litter, a box of stale granola bars, and a tattered floor mat. How are you going to get your car out of this predicament?	No	Unsolvable because the car in the situation is stuck in a ditch. It would need a towing vehicle to pull it out of the ditch given the snowy situation and lack of tools.
1641	You are alone on a silent, snowy road, and your car is stuck in a ditch with 2 feet of snow. You have a dim flashlight with dwindling battery, a pair of gloves soaked and freezing, a torn umbrella, a bag of hardened clumping cat litter, a box of stale granola bars, and a tattered floor mat. How are you going to get your car out of this predicament?	No	Unsolvable because we have no shovel or reasonable alternative, the cat litter is hardened, and nothing else listed could be helpful in this situation.
1693	You are cooking a complex dish. The recipe requires you to make a steam bath, but you don't have a steam tray. You have a pair of identical pots, one with a long handle and another without, a three-foot square piece of heavy duty aluminum foil, a handheld cheese grater with a firm grip, a shatterproof glass lid with a small vent, a circular colander with irregular large holes making it unstable w…	Yes	Use the piece of aluminum foil. Fold it in half, then fold up the edges, into a make shift steam tray. Fill this steam tray with water, then heat and use it as your steam bath.
1693	You are cooking a complex dish. The recipe requires you to make a steam bath, but you don't have a steam tray. You have a pair of identical pots, one with a long handle and another without, a three-foot square piece of heavy duty aluminum foil, a handheld cheese grater with a firm grip, a shatterproof glass lid with a small vent, a circular colander with irregular large holes making it unstable w…	Yes	Step1 Fill the pot with the long handle with water. Step2 Use the aluminum foil to cover the back of the cheese grater and poke small holes on it. Step3 Replace the lid of the pot with the cheese grater. Place the side with the aluminum foil up. Step4 Boil the water so the steam will come through the cheese grater and the aluminum foil cover to form a steam bath.
1697	You've discovered a rare plant potentially being a new species hidden deep in a small crevice. The crevice is too narrow for your hand, the depth is unknown, and you don't have tweezers or other picking tools. You have a basic model of a Swiss army knife, a map printed on thick paper, a half-squeezed plastic water bottle, a small LED torch without a focusing feature, a food packet with a tight va…	No	Unsolvable because of the narrow crevice, its unknown depth, and the small dense gravel that would foil any scoop we could make with the listed items.
1697	You've discovered a rare plant potentially being a new species hidden deep in a small crevice. The crevice is too narrow for your hand, the depth is unknown, and you don't have tweezers or other picking tools. You have a basic model of a Swiss army knife, a map printed on thick paper, a half-squeezed plastic water bottle, a small LED torch without a focusing feature, a food packet with a tight va…	Yes	step one: use the knife to clear the gravel around the plant step 2: cut a small strip from the map step three uproot the plant with the help of the knife step 4: place the plant in the map and wrap it step 5" put it inside the water bottle for safe keeping
1723	You want to do a wall ball workout, but don't have a medicine ball. The available items are a deflated soccer ball, a lightweight foam ball, duct tape, several small and hard tennis balls, a thin fabric bag, fine-grain sand, and empty water bottles. The soccer ball has a hole in it, so it cannot maintain its shape when you put the sandbag in it. The duct tape is flimsy, so it cannot sustain exten…	Yes	step 1: pour fine grain sand inside the ball from the small hole step 2: use the duct tape to seal the hole to prevent the sand from falling off step 3: use it for the intended workout
1723	You want to do a wall ball workout, but don't have a medicine ball. The available items are a deflated soccer ball, a lightweight foam ball, duct tape, several small and hard tennis balls, a thin fabric bag, fine-grain sand, and empty water bottles. The soccer ball has a hole in it, so it cannot maintain its shape when you put the sandbag in it. The duct tape is flimsy, so it cannot sustain exten…	No	unsolvable, because firstly the soccer ball can't maintain the shape when used with sand in it, secondly the lightweight foam ball can't withstand the weight of the sand or the tennis, thirdly the duct tape can't sustain heavy use so you can't use it to seal the balls. Therefore the problem isn't solvable due to limitations of the items.
1725	You're stuck without a jump rope but you need to do skipping. You have a long broomstick, a pair of old stockings that barely reach the knees and are really thin, semi-soaked rags, a couple of light and small rocks, and a short garden hose. How do you create a makeshift jump rope with these constraints?	Yes	Step 1. Use the short garden hose to serve as a makeshift jump rope.
1725	You're stuck without a jump rope but you need to do skipping. You have a long broomstick, a pair of old stockings that barely reach the knees and are really thin, semi-soaked rags, a couple of light and small rocks, and a short garden hose. How do you create a makeshift jump rope with these constraints?	Yes	Step1 Break the broomstick into smaller pieces to serve as the handles of the jump rope. Step2 Put a small rock in each stock and tie it to the handle bar made of the broomstick. Step3 Hold the broomstick pieces and start waving them like a jump rope, jump when you hear the rock in the stock hitting the ground. You don't jump over the stock but jump according to the sound instead.
1727	You need to perform a tricep dip exercise but don't have parallel bars. You have a broomstick that is very thick across, two sturdy yet uneven tables, a soft skipping rope, a rusty but sturdy shower rod, and brittle yoga blocks. The difference in height between the tables is significant, making it difficult to perform tricep dips on them. How can you workout using these items given the constraint…	No	Unsolvable because the potential supports are rendered unsuitable by constraints. The tables are uneven and the yoga blocks are brittle.
1727	You need to perform a tricep dip exercise but don't have parallel bars. You have a broomstick that is very thick across, two sturdy yet uneven tables, a soft skipping rope, a rusty but sturdy shower rod, and brittle yoga blocks. The difference in height between the tables is significant, making it difficult to perform tricep dips on them. How can you workout using these items given the constraint…	Yes	Step 1: place the tables one different end step 2: use the yoga block to elevate the table that is shorter to bring both tables to same height step 3: place the sturdy thick broom across the table step 4: use the skipping rope to secure the broom to both table to prevent movement
1737	Halfway through your passionate speech, the lights in the old auditorium go out, plunging the room into darkness. You have a sturdy, adjustable-height tripod stand, a chilled, half-full bottle of water, a pocket-sized LED flashlight, a flathead screwdriver, a vintage tungsten extra bulb, and a roll of duct tape. However, the flashlight, despite sporting a new set of batteries, is not powerful eno…	Yes	Step 1. Use the duct tape to attach the flashlight to the tripod stand. Step 2. Move the tripod stand to direct the light to illuminate yourself for the audience, then continue speaking.
1737	Halfway through your passionate speech, the lights in the old auditorium go out, plunging the room into darkness. You have a sturdy, adjustable-height tripod stand, a chilled, half-full bottle of water, a pocket-sized LED flashlight, a flathead screwdriver, a vintage tungsten extra bulb, and a roll of duct tape. However, the flashlight, despite sporting a new set of batteries, is not powerful eno…	Yes	Step 1. Place the bottle of water onto the top of the tripod. Use duct tape to keep it in place. Step 2. Position the LED flashlight so that it will direct its beam onto the bottle of water. Use duct tape if needed to secure it in place. Step 3. Turn on the LED flashlight and move it around to the right angle to put off the most reflected light from the water bottle.
1742	It's move out day, and your job is to pack a huge, heavy Persian rug, but no packing straps are available. The objects around you are a half-sized broom with a short metal handle, a couple of vintage long leather belts, a regular-sized pencil with a used eraser, a low-strength duct tape, a t-shirt from your last marathon, and a small metal lunchbox. The broomstick is shorter than the width of the…	No	Unsolvable because the listed items which could reasonably be used to pack the rug have all been rendered useless by their constraints.
1742	It's move out day, and your job is to pack a huge, heavy Persian rug, but no packing straps are available. The objects around you are a half-sized broom with a short metal handle, a couple of vintage long leather belts, a regular-sized pencil with a used eraser, a low-strength duct tape, a t-shirt from your last marathon, and a small metal lunchbox. The broomstick is shorter than the width of the…	Yes	Step 1. Unroll the belts and wrap the low-strength duct tape around them in a horizontal pattern, similar to the bands of color on a snake's body. Step 2. Continue to wrap the duct tape around the entire length of each belt. The tape may be weak, but it can stick to itself, and with a few layers, it will greatly enhance the durability of the belts. Step 3. Wrap the belts around the rolled up rug.…
2097	You want to mark your newly-planted, colorful petunia flowers but realized that your set of plant tags has gone missing. Among your belongings, you have a medium-size, bristle paintbrush, a shiny metallic jar lid, a roll of soft cotton string, thick foggy weather after a soaking-heavy rain, a few unused popsicle sticks, a green, sturdy plastic bucket, a waterproof blue tarp, and a dried-out sharp…	Yes	Step 1. Decide on a word or symbol to use to mark your petunias Step 2. Arrange the popsicle sticks to form that symbol. Step 3. Tightly tie the popsicle sticks together into a crude approximation of the symbol you wish to use to mark your petunias. Step 4. Stick the popsicle stick sculpture down into the dirt, perhaps using the paintbrush handle to form a small hole. The sticks will now work as …
2097	You want to mark your newly-planted, colorful petunia flowers but realized that your set of plant tags has gone missing. Among your belongings, you have a medium-size, bristle paintbrush, a shiny metallic jar lid, a roll of soft cotton string, thick foggy weather after a soaking-heavy rain, a few unused popsicle sticks, a green, sturdy plastic bucket, a waterproof blue tarp, and a dried-out sharp…	Yes	Step 1. Use the soft cotton string to mark the popsicle sticks in code. Loop certain patterns to indicate your code, tying the string off and breaking it to move on to the next. Step 2. Use these popsicle stick markers to mark your petunias. It will be easy to press the ends into the soil after the heavy rain.
2100	To boost the growth of your sensitive seedlings, you need to create a mini-greenhouse effect but don't have a glass dome. However, you do have a large, plain wooden serving tray, a snaking garden hose, a clear and thick plastic sheet, a filled watering can, a pile of unused absorbent sponges, and several clear plastic cups (with extra holes). How do you manage it?	Yes	Step 1. Arrange the plastic cups in a square or rectangle shaped perimeter around the seedlings. Step 2. Lay the plastic sheet over the top of this frame of plastic cups so that it covers the seedlings and leave some extra sheeting on the ground on all four sides. Step 3. Balance the wooden serving tray on top of the rear side of the perimeter of cups so that the tray will keep the plastic in pla…
2100	To boost the growth of your sensitive seedlings, you need to create a mini-greenhouse effect but don't have a glass dome. However, you do have a large, plain wooden serving tray, a snaking garden hose, a clear and thick plastic sheet, a filled watering can, a pile of unused absorbent sponges, and several clear plastic cups (with extra holes). How do you manage it?	Yes	Step1: fill the plastic cup with soil and Place the seedlings inside step 2: place the on the wooden tray and put them in a position that would expose them to sunlight step 3: use the sponge to collect water from the water can and sprinkle water on the plant to avoid dehydration step 4: cover the plant with the clear plastic sheet so as to regulate the temperature
2103	Bold, local birds are ruining your garden by feasting on your newly planted sunflower seeds, leaving no hope for a summer bloom. You don't have a scarecrow or any netting to keep them at bay. You have a small metal handheld mirror which reflects sunlight very brightly, a long, maple stick, a pile of old data CDs and rusted tin cans, a shiny, round bell, an unused bird feeder, and a ball of thick,…	Yes	Step 1. Use the maple stick to create a scarecrow framework by embedding it in the ground in the center of the sunflower patch. Step 2. Use the bird feeder to top the maple stick by removing the top, inverting it, and setting it on the stick. Step 3. Use the yarn to hang cds from the bird feeder, so that they hang down and blow in the wind, scaring the birds.
2103	Bold, local birds are ruining your garden by feasting on your newly planted sunflower seeds, leaving no hope for a summer bloom. You don't have a scarecrow or any netting to keep them at bay. You have a small metal handheld mirror which reflects sunlight very brightly, a long, maple stick, a pile of old data CDs and rusted tin cans, a shiny, round bell, an unused bird feeder, and a ball of thick,…	Yes	Step 1: Place the bird feeder in a separate area of the garden, away from the sunflower seeds. Step 2: Place the cds around the seeds, turned upward, to reflect back any light that shines on them. That will help keep the birds away. Step 3: tie the small mirror with the string to a tin can, and angle it so it catches sunlight and reflects it towards the seeds for as much of the day as possible. T…
2110	You wish to film a bubbling science experiment for your project, but you don't have a sturdy smartphone tripod. The resources available to you are a desk lamp with a flexible stem, large rubber bands used for packing, a box of thumbtacks with sharp points, a roll of grey duct tape, a wire coat hanger made from a stiff metal, and a tall stack of textbooks with rough cover surfaces, slightly flexib…	Yes	Step 1. Use rubber bands to attach the smartphone to the lamp stem, keeping the bands out of the way of the phone's camera. Step 2. Bend the desk lamp's stem to angle the view as desired.
2110	You wish to film a bubbling science experiment for your project, but you don't have a sturdy smartphone tripod. The resources available to you are a desk lamp with a flexible stem, large rubber bands used for packing, a box of thumbtacks with sharp points, a roll of grey duct tape, a wire coat hanger made from a stiff metal, and a tall stack of textbooks with rough cover surfaces, slightly flexib…	Yes	Step 1. Fold the desk lamp stem over so that the lamp section is at the perfect viewing angle to film your experiment. This will be the top of your improvised tripod. Step 2. Wrap one heavy rubber band around your smartphone, being careful not to cover the camera lens or any part of the screen that you will need to manipulate to start the recording. This will provide some friction to help keep th…
2125	A mid-size cylindrical jar, filled to the brim with multi-colored pens, seems to have been sealed shut and doesn't budge to your efforts. To solve this dilemma, you have a robust-looking metal stapler, some elastic bands that have unfortunately lost their elasticity over time, a generous portion of different sizes of paperclips, a thick roll of duct tape which seems to have compromised adhesive p…	Yes	Step 1. Use the stainless steel spoon's handle to tap around the edge of the lid of the jar carefully. This can help break the seal, and create a ridged surface to offer better grip.
2125	A mid-size cylindrical jar, filled to the brim with multi-colored pens, seems to have been sealed shut and doesn't budge to your efforts. To solve this dilemma, you have a robust-looking metal stapler, some elastic bands that have unfortunately lost their elasticity over time, a generous portion of different sizes of paperclips, a thick roll of duct tape which seems to have compromised adhesive p…	Yes	Step 1. Take a rubber band and place it against the lid. Step 2. Take your palm and press it against the rubber band that is pressed to the lid. Step 3. Unscrew the lid in a counter-clockwise direction and it should come undone due to the extra traction the rubber band provides.
2131	You need to measure a 10-foot distance on a city sidewalk but you only have a one-foot ruler. You also have a cylindrical soda bottle with a height exactly equal to the ruler, a small flat rock about palm-sized, a piece of chalk only an inch long, a leather wallet nearly the same length as the ruler, chewing gum in a pack of five sticks, and shoelaces approximately two feet long but very flexible…	Yes	Step 1. Place the small rock at the beginning point of your measurement, and try to draw around it with chalk. The chalk may not last, but this is just a backup in case someone knocks the rock out of place. Step 2. Tear the chewing gum sticks in half, and set them aside for a moment. Step 3. Carefully line up the bottom of the soda bottle with the rock, or with your starting point, whichever is e…
2131	You need to measure a 10-foot distance on a city sidewalk but you only have a one-foot ruler. You also have a cylindrical soda bottle with a height exactly equal to the ruler, a small flat rock about palm-sized, a piece of chalk only an inch long, a leather wallet nearly the same length as the ruler, chewing gum in a pack of five sticks, and shoelaces approximately two feet long but very flexible…	Yes	step 1: use the wallet in place of the ruler Step 2: measure one feet and use the piece of rock to mark the point on the concrete step 3: repeat step 2 until you are able to measure the required 10 feet.
2137	You're planning to light up a fire in the camp but you only have one matchstick left and the wind is quite ferocious. You have a blunt knife, a plastic bag that is perforated, an empty glass jar with a tiny opening, a cotton beach towel that is quite damp, a tin can with sharp and rusty edges, and some paper trash that is not fully dry. How can you shield your matchstick from the wind and still l…	No	Unsolvable because we have no way of shielding the match stick from the wind, and getting it going. All potential fuel that could catch quickly is damp. The tin can isn't safe to use, and the glass jar's opening is too small. We can't form a wall from these to shelter the match because they're too small, and the wind would whip around them.
2137	You're planning to light up a fire in the camp but you only have one matchstick left and the wind is quite ferocious. You have a blunt knife, a plastic bag that is perforated, an empty glass jar with a tiny opening, a cotton beach towel that is quite damp, a tin can with sharp and rusty edges, and some paper trash that is not fully dry. How can you shield your matchstick from the wind and still l…	Yes	Step 1. Roll the plastic bag around into a donut shape and hold it against the sharp rim of the tin can with one hand. Step 2. Light the match and quickly move it inside of the tin can that you are safely holding in your other hand. Step 3. Carefully move the covered, burning match over to the fire that you want to light. Step 4. Move the match to whatever material you were planning to burn and l…
2140	You left your food out, and some animals have come into your camping area that you want to scare away without being seen. You have an empty, soft-plastic water bottle, a tin can with sharp edges, a battery-drained radio, a thin and crumpled sheet of aluminum foil, smooth round pebbles, and a small bicycle bell. Given that your hands are slightly injured and thus limits your grip and strength to t…	No	Unsolvable given the state of our hands, the constraints on the listed items. The radio's battery is drained, and our hands are too injured to grip the bicycle bell or rattle the bottle. The can isn't safe to use, and the aluminum foil wouldn't make enough noise.
2140	You left your food out, and some animals have come into your camping area that you want to scare away without being seen. You have an empty, soft-plastic water bottle, a tin can with sharp edges, a battery-drained radio, a thin and crumpled sheet of aluminum foil, smooth round pebbles, and a small bicycle bell. Given that your hands are slightly injured and thus limits your grip and strength to t…	Yes	Step 1. Use the can and the pebbles as a noisy rattle by placing the pebbles inside the can. Step 2. Use the can and pebbles as a rolling noisy rattle by placing the can at the door of your tent and kicking it with your foot.
2141	You need to prepare some coffee but you don't have a coffee filter. You do have a stainless steel saucepan, a wooded tablespoon, a narrow opening cooking pot, some durable elastic bands, a clean sock, and an absorbent bandana made out of natural fibers. However, the bandana, being square and small, can only filter a small amount of coffee at a time. The cooking pot has a narrow opening, making it…	Yes	Step 1. Place the clean sock into the narrow opening of the cooking pot. Step 2. Use the elastic bands to secure the clean sock into this position. Step 3. Use the clean sock to filter coffee.
2141	You need to prepare some coffee but you don't have a coffee filter. You do have a stainless steel saucepan, a wooded tablespoon, a narrow opening cooking pot, some durable elastic bands, a clean sock, and an absorbent bandana made out of natural fibers. However, the bandana, being square and small, can only filter a small amount of coffee at a time. The cooking pot has a narrow opening, making it…	Yes	Step1: Place the clean sock into the cooking pot, making sure it's open and the top is hanging over the edge of the cooking pot. Step2: Secure the sock with the elastic bands around the edges of the cooking pot. Step3: Pour coffee grounds into the sock. Step4: Pour hot water slowly over the grounds in the sock, allowing it to drip through into the cooking pot.
1793	You want to irrigate a small garden on your terrace but the water pressure from your home is low. You have a lightweight, rollable yoga mat, a garden hose, a small round lunch box, rollerblade wheels, a large rectangular plastic bin with cracks along the bottom and a lengthy, wooden broom with stiff bristles. The plastic bin has cracks that are too big to be sealed with the lunch box. How can you…	Yes	Step 1. Use the small round lunchbox to carry water to the plants.
1793	You want to irrigate a small garden on your terrace but the water pressure from your home is low. You have a lightweight, rollable yoga mat, a garden hose, a small round lunch box, rollerblade wheels, a large rectangular plastic bin with cracks along the bottom and a lengthy, wooden broom with stiff bristles. The plastic bin has cracks that are too big to be sealed with the lunch box. How can you…	Yes	Step 1. Unroll the yoga mat and place it on the bottom of the plastic bin to cover the cracks Step 2. Place the broomstick and rollerblade wheels under the plastic bin to allow it to roll. Step 3. Fill the plastic bin with water from the low-pressure hose. The weight of the water will hold the yoga mat down over the cracks, at least temporarily. Step 4. Roll the full bin over to the terrace. Step…
1796	You need to quickly cool a six-pack of soda, but your cooler is damaged and cannot hold ice. You have a heavy-duty metal grilling spatula, small-sized ice cubes, a large thick towel, an inflated beach ball, a large plastic bag with numerous small holes across its surface, and a metal bottle opener. The plastic bag has holes that the ice cubes slip out of, not holding the ice securely. How can you…	Yes	Step 1. Use the towel as a place to hold the ice cubes by rolling it out flat and placing the ice cubes in a thick band. Step 2. Use the ice cubes in the towel to keep the soda cool by laying the soda on top of the ice cubes and wrapping the towel around them so they are no longer exposed to the open air.
1796	You need to quickly cool a six-pack of soda, but your cooler is damaged and cannot hold ice. You have a heavy-duty metal grilling spatula, small-sized ice cubes, a large thick towel, an inflated beach ball, a large plastic bag with numerous small holes across its surface, and a metal bottle opener. The plastic bag has holes that the ice cubes slip out of, not holding the ice securely. How can you…	Yes	Step 1. Lay the towel out and place the sodas in the middle. Step 2. Pour the ice cubes on top of the sodas. Step 3. Fold the towel over the soda and ice and wrap the towel in a bundle. Step 4. Place the bundle in the large plastic bag. Step 5. Let it sit in the bag as the ice continues the cool down the soda.
1804	You are stuck in a desert storm, and you need to create an emergency shelter. You have a small floral-patterned umbrella, a long but frail stick, a pair of blunt-end scissors, a hollow can, a bunch of small, round rocks, and a thin, fragile emergency blanket that tears easily. However, the blanket is not sufficient to provide shelter against the escalating wind and sand particles. How will you cr…	No	Unsolvable because the listed items aren't capable of providing shelter in these harsh conditions. The blanket is too fragile and the umbrella is too small. The rocks cannot reasonably be used to build something because they're small and round.
1804	You are stuck in a desert storm, and you need to create an emergency shelter. You have a small floral-patterned umbrella, a long but frail stick, a pair of blunt-end scissors, a hollow can, a bunch of small, round rocks, and a thin, fragile emergency blanket that tears easily. However, the blanket is not sufficient to provide shelter against the escalating wind and sand particles. How will you cr…	No	Your only hope in this situation would be to create a framework and wrap the emergency blanket around that frame to shield yourself from the blowing sand. The umbrella is too small to do much of anything aside from partially protect your face. Unfortunately, the blanket will not hold up to the blowing sand, so you cannot create a feasible shelter with these tools.
1808	You need to cook a snake you caught to survive but have no skewers or grill. You have a slightly rusted compass with a cracked glass, delicate aluminum foil that is very thin and tears easily, a thin, weak stick that can easily snap, a blunted knife, and a pair of eyeglasses with one missing lens. The aluminum foil is not enough to wrap up the entire snake. How will you prepare to cook?	No	Unsolvable because the stick is fragile, the knife is blunt, and the foil is too small.
1808	You need to cook a snake you caught to survive but have no skewers or grill. You have a slightly rusted compass with a cracked glass, delicate aluminum foil that is very thin and tears easily, a thin, weak stick that can easily snap, a blunted knife, and a pair of eyeglasses with one missing lens. The aluminum foil is not enough to wrap up the entire snake. How will you prepare to cook?	Yes	Step 1. Use the knife to cut up the snake. It will take extra effort, but even a blunt knife can cut with enough force. Step 2. Use the aluminum foil to provide a place for the snake to rest while also providing a reflective surface for cooking. Step 3. Use the eyeglasses to focus the sunlight on the snake, allowing it to cook.
1810	You are losing body moisture through sweating in the day time in the desert but have no consumable water left. You have an old, dusty mirror with a small crack on the surface, a loosely-woven plastic bag with a small hole in it, a young sapling nearby, a partially broken-shovel with the wooden handle about to split, a sun-faded rope, and a whistle made of wood with a crack on it. Despite the hole…	Yes	Step 1. Place the plastic bag around the plant to try to capture the moisture that transpires from the plant's leaves. If possible, try to collect some drier leaves of some of the stem to try to plug the hole in the bag. Step 2. Use the mirror and the shovel to hold the bottom of the bag in place Step 3. Try to wring any moisture that collects on the inside of the loosely-woven bag into your mout…
1816	You're enjoying a solo ride on your boat when the handle attached to the rudder snaps, leaving you adrift. Your available resources include a handheld mirror with a plastic frame, a silicone snorkeling mask, a signal flare gun without any flares, a roll of duct tape, a compact rubber duck, and a small handheld broom with stiff, artificial bristles. Duct tape fails to stick when exposed to water a…	No	Unsolvable, because none of the items can efficiently steer the boat or repair the rudder so the problem can't be solved without more proper tools and items suited for steering.
1816	You're enjoying a solo ride on your boat when the handle attached to the rudder snaps, leaving you adrift. Your available resources include a handheld mirror with a plastic frame, a silicone snorkeling mask, a signal flare gun without any flares, a roll of duct tape, a compact rubber duck, and a small handheld broom with stiff, artificial bristles. Duct tape fails to stick when exposed to water a…	Yes	Step 1. Use the broom as an oar by sticking it in the water on the side you need to turn on. This will protect you from the moving parts near the broken rudder.
1818	In the middle of your trip, you realize you forgot to bring an anchor. You have a cooler made of strong, durable plastic that's already filled with food and drinks, a beach towel that's slightly oversized, a pair of sunglasses with polarized lens, an 8ft nylon rope that's slightly frayed along certain areas, a heavy iron pot with several small holes at the base, and a bag of uneven-sized stones. …	No	Unsolvable because the rope is too short and frayed, with no available alternatives.
1818	In the middle of your trip, you realize you forgot to bring an anchor. You have a cooler made of strong, durable plastic that's already filled with food and drinks, a beach towel that's slightly oversized, a pair of sunglasses with polarized lens, an 8ft nylon rope that's slightly frayed along certain areas, a heavy iron pot with several small holes at the base, and a bag of uneven-sized stones. …	No	Unsolvable, because even if you combine the beach towel and the rope to get the maximum length, it will not be enough to go more than a foot or two in the water. If you could get enough length, the pot would work as an anchor, even with the holes in it.
1822	A sudden gust of wind has blown your old parchment map overboard. Though retrieved, it's ripped into four uneven pieces. You have a pen out of ink, a large bird feather, a compass with a detached, magnetic needle, a wet roll of cotton that's too soggy to use immediately, a hot thermos of unsweetened coffee that's cooling down rapidly, and a reel of scotch tape that's not strong enough to hold its…	No	Unsolvable, because none of the provided items will be able to repair the map and there needs to be a strong adhesive the put it back together.
1822	A sudden gust of wind has blown your old parchment map overboard. Though retrieved, it's ripped into four uneven pieces. You have a pen out of ink, a large bird feather, a compass with a detached, magnetic needle, a wet roll of cotton that's too soggy to use immediately, a hot thermos of unsweetened coffee that's cooling down rapidly, and a reel of scotch tape that's not strong enough to hold its…	Yes	Step 1. Arrange the four pieces together to form a complete map. Step 2. Place the coffee thermos down on the right side as a paperweight to hold two pieces flat on the table. Step 3. Perform a similar maneuver using the compass as a paperweight on the left side, holding the other two pieces down on their outside edge as well. Step 4. Lay the pen diagonally across the center intersection of the s…
1825	You tasked yourself with creating an intricate snow maze, aiming to only leave your footprints as a navigational instruction. You have a heavy-duty sled with a warped edge on the right side, a high-pitched whistle made of metal, a single aluminium ski pole that's bent near the bottom, a large patterned umbrella with a wooden handle, a slightly torn geographical map of the local mountain range, an…	Yes	Step 1. Plan out your route using the map Step 2. Walking along your path, use the umbrella handle to trace your progress Step 3. Now that you have made a trail, use either the ski pole or the umbrella handle to mark out two sides, creating a designated path Step 4. Walk your path again, this time dragging the sled behind you, with its strongest edge on the now. Step 5. Smooth down the snow as yo…
1825	You tasked yourself with creating an intricate snow maze, aiming to only leave your footprints as a navigational instruction. You have a heavy-duty sled with a warped edge on the right side, a high-pitched whistle made of metal, a single aluminium ski pole that's bent near the bottom, a large patterned umbrella with a wooden handle, a slightly torn geographical map of the local mountain range, an…	Yes	Step1: Use the sled to compact a path in the snow, with the warped edge creating maze walls. step 2: use the ski pole to map out the maze step 3: use the tin can to smooth out the walls of the maze step 4: cut the map in section and use it as a guide for the maze
1831	You have a dream of creating a snowboarding track in your snow-filled backyard. However, the snow is vanishingly powdery. You have a rugged, dirt-ridden bicycle tire, a wooden ladder with shaky rungs, a several-foot-long plank of wood that's narrow and slightly creaky, a rusty barrel, a pair of garden shears with blunt blades, and a fraying rope. How can you ingeniously make a compact track out o…	No	Unsolvable. Given the state of the snow, there's no way to make this safely.
1831	You have a dream of creating a snowboarding track in your snow-filled backyard. However, the snow is vanishingly powdery. You have a rugged, dirt-ridden bicycle tire, a wooden ladder with shaky rungs, a several-foot-long plank of wood that's narrow and slightly creaky, a rusty barrel, a pair of garden shears with blunt blades, and a fraying rope. How can you ingeniously make a compact track out o…	Yes	Step 1. Use the plank to try to compact down as much of the loose snow as possible. Step 2. Lay the barrel down on its side and anchor it as firmly as you can into the snow. Step 3. Lay the ladder across the barrel diagonally to create a sort of makeshift ramp. Step 4. Lay the plank on top of the ladder to create a smoother path. Step 5. Wedge the bicycle tire and the shears into the crack below …
1832	You're in the middle of making a monumental snowball to start building a snowman, but the snow texture is disappointingly dry and powdery. You have a large, already damp towel, a slightly rusty ice cream scoop, a large perforated plastic bag, a heavy gardening rake, a small bucket, and an empty spray bottle with a failing nozzle. How can you work tactfully with these somewhat challenging items to…	No	There is no way this is going to happen. I've spent a lot of time in the snow and if the snow is light and not packable it isn't going to work for making a snowman. You can try to wet the snow with water but this will not work because you need to roll the balls to make a snowman. The damp towel will end up getting covered in snow and then frozen. This isn't going to work unless the right kind of …
1832	You're in the middle of making a monumental snowball to start building a snowman, but the snow texture is disappointingly dry and powdery. You have a large, already damp towel, a slightly rusty ice cream scoop, a large perforated plastic bag, a heavy gardening rake, a small bucket, and an empty spray bottle with a failing nozzle. How can you work tactfully with these somewhat challenging items to…	Yes	Step 1. Use the gardening rake to agitate as much snow on the ground as possible to warm it up and hopefully melt it into a thicker, more moldable form. Step 2. Shovel the snow by hand into the bucket and press down on it to try to compact it before dumping it out. Step 3. Continue with step 2 until you have a large pile of semi-compacted snow. Step 4. If necessary, go back and rake more snow to …
1833	You want to remove lightweight, sticky snow from a metal swing to allow for safe play, but you don't have a shovel. You have an extension cord that is too short (only about 3 feet long) to reach the swing, a plastic bucket with a small hole at the bottom, a long broomstick that is somewhat flexible, a simple dust pan with no handle, a large tarp that is partially ripped, and a hairdryer that only…	Yes	Step 1. Use the dustpan to scrape the snow from the swing. Despite lacking a handle, it can still be useful as a makeshift scraper.
1833	You want to remove lightweight, sticky snow from a metal swing to allow for safe play, but you don't have a shovel. You have an extension cord that is too short (only about 3 feet long) to reach the swing, a plastic bucket with a small hole at the bottom, a long broomstick that is somewhat flexible, a simple dust pan with no handle, a large tarp that is partially ripped, and a hairdryer that only…	Yes	Step 1. Use the simple dust pan to push away as much snow as possible off of the metal swing. You don't need a handle to do this. Step 2. Use the extension cord to plug into the hair dryer. Bring this to the wiped off swing. Step 3. Turn on the hair dryer to melt any remaining snow on the swing.
1836	You are trying to create realistic animal footprints in the snow for a game, but your own footprints are creating a mess on the path. You have a tub of paint which is thick and drying up, a toy of the animal which is too small and lacks detail, a cardboard box which is slightly wet, a metal ladder which is too short, a pair of ski poles, and several crumpled pages of newspaper. How can you create…	Yes	Step 1. Break the box apart into multiple flat pieces Step 2. Use thick paint to create a sort of thick glue to stick two flat pieces together. Step 3. Tear the remaining pieces of cardboard into animal footprint shapes. Step 4. Apply a thick coat of the remaining paint to one side of each footprint. Step 5. Go out to the snow, and kneeling down on your thick carboard mat, smooth out your own foo…
1836	You are trying to create realistic animal footprints in the snow for a game, but your own footprints are creating a mess on the path. You have a tub of paint which is thick and drying up, a toy of the animal which is too small and lacks detail, a cardboard box which is slightly wet, a metal ladder which is too short, a pair of ski poles, and several crumpled pages of newspaper. How can you create…	Yes	step 1: Use the cardboard box to create a stencil of the animal footprints. step 2: place the ladder flat on the floor and walk on it so as to avoid spreading your foot prints step 3: Use the ski poles to stabilize yourself on the ladder Step4: Impress the paint-covered stencil onto the snow to create the footprints.
1842	Your dog is famished, but you've left their bowl at a friend’s place. The tools at a hand include a heavy iron ladle, a glossy fashion magazine, industrial-grade duct tape, a cotton oven mitt, a large, heat-damaged tupperware lid that refuses to lay flat on the ground, and a food processor with multiple blade options. How can you feed your dog with the given items without spilling food all over?	Yes	Step 1. Tear out several pages from the magazine. Step 2. Arrange the pages on the floor and overlap them until you have a large surface. Step 3. Put the dog food in a pile on the papers. Step 4. Throw away the papers afterwards and the area should be clean.
1842	Your dog is famished, but you've left their bowl at a friend’s place. The tools at a hand include a heavy iron ladle, a glossy fashion magazine, industrial-grade duct tape, a cotton oven mitt, a large, heat-damaged tupperware lid that refuses to lay flat on the ground, and a food processor with multiple blade options. How can you feed your dog with the given items without spilling food all over?	No	Unsolvable because nothing listed is capable of containing the dog food. The components aren't capable of creating a container that would withstand a dog attempting to eat out of it, and meet the goal of not spilling the food.
1414	During a beach clean-up, your designer plastic bag holder breaks. You only have a glass jar, a roll of duct tape with one last loop left but has lost its stickiness due to humidity, a sand-caked beach towel, a kitchen spatula, an empty wide-mouthed water bottle, a dog-eared paperback mystery novel soaked in saltwater making it brittle, a couple of novelty mini hula hoops, a curly thin cord, and a…	Yes	Step 1. Use the wide-mouthed water bottle to hold the plastic bags.
1414	During a beach clean-up, your designer plastic bag holder breaks. You only have a glass jar, a roll of duct tape with one last loop left but has lost its stickiness due to humidity, a sand-caked beach towel, a kitchen spatula, an empty wide-mouthed water bottle, a dog-eared paperback mystery novel soaked in saltwater making it brittle, a couple of novelty mini hula hoops, a curly thin cord, and a…	Yes	Step 1. Take the handle of the spatula and insert it into the neck of the water bottle. This will leave you with a dumb-bell like shape that could effectively hold onto bags without them slipping. Step 2. Take the remaining roll of duct tape and form it into a donut shape. This can be wedged into the neck of the bottle to hold the spatula handle in place. Step 3. Take the curly cord and tie up th…
1415	You're preparing a beach picnic, but realize you forgot the tongs to flip your burgers on the grill. The only additional items you have are a Chinese paper fan, a bag of seashells, a kite, hulking metal coat hangers too thick to shape by hand, a thin roll of baking foil, a partially deflated beach ball, sunblock lotion SPF 100, a smartphone, and a pair of industrial safety gloves that quickly ove…	No	Unsolvable because the listed items are unsuitable for use with heat and food. We cannot form a safe alternative to tongs with these items. The foil is too thin, the safety gloves melt, and the coat hangers can't be shaped by hand.
1415	You're preparing a beach picnic, but realize you forgot the tongs to flip your burgers on the grill. The only additional items you have are a Chinese paper fan, a bag of seashells, a kite, hulking metal coat hangers too thick to shape by hand, a thin roll of baking foil, a partially deflated beach ball, sunblock lotion SPF 100, a smartphone, and a pair of industrial safety gloves that quickly ove…	No	Unsolvable, because none of the items provided in the scenario can create makeshift tongs or spatulas that can flip the burgers efficiently and safely and you need more proper tools to solve the issue.
1431	You have to do a pedicure but don't have any foot soak or a foot file. The items available are a hand wash, Epsom salt, warm water, a tub, baking soda, a quartz stone, a soft towel, a toothbrush, an unused sponge, and a hair dryer. The toothbrush has delicate bristles and the quartz stone has a splash of sharp edges. However, the quartz stone is too rough to use on the skin, the toothbrush bristl…	Yes	Step 1. Use some of the Epsom salt and warm water in the tub to create a soak, and soak the feet. Step 2. Use additional Epsom salt to exfoliate the feet. Step 3. Use warm water to rinse the feet. Step 4. Use the soft towel to dry.
1431	You have to do a pedicure but don't have any foot soak or a foot file. The items available are a hand wash, Epsom salt, warm water, a tub, baking soda, a quartz stone, a soft towel, a toothbrush, an unused sponge, and a hair dryer. The toothbrush has delicate bristles and the quartz stone has a splash of sharp edges. However, the quartz stone is too rough to use on the skin, the toothbrush bristl…	Yes	Step 1. Pour some of the epsom salt onto the towel Step 2. Add a very small amount of water to the salt to make a paste Step 3. Pick up the paste in the towel and rub it on your feet as vigorously as you can. The towel should allow the somewhat rough salt to exfoliate your skin to some degree. Step 4. Use the toothbrush, dipped in some of the remaining paste to add a final soft rub to your skin. …
1441	You have to do a pedicure but don't have any foot soak or a foot file. The items available are a quartz stone, a tub, nail polish, Epsom salt, warm water, facial cleanser, a soft towel, foot lotion, baking soda, and a toothbrush. The tub has a hole that can't hold water, and the toothbrush has delicate bristles. The quartz stone is very smooth on both sides. How can you get a clean and fresh foot…	No	Unsolvable because nothing listed is capable of holding water for a soak, and the makeshift items aren't suitable for filing, given the constraints.
1441	You have to do a pedicure but don't have any foot soak or a foot file. The items available are a quartz stone, a tub, nail polish, Epsom salt, warm water, facial cleanser, a soft towel, foot lotion, baking soda, and a toothbrush. The tub has a hole that can't hold water, and the toothbrush has delicate bristles. The quartz stone is very smooth on both sides. How can you get a clean and fresh foot…	Yes	Step 1. Unfold the towel and create an improvised pouch that can hold onto the salt. Step 2. Pour the Epsom salt into the towel and add a very small amount of warm water to create a paste. Step 3. Use the towel to rub this fairly rough salt paste onto your feet, and it will provide some level of exfoliation. Step 4. Run the soft toothbrush through the remaining paste and try to smooth out your fe…
821	You have a can of beans for your picnic and realize you have forgotten your can opener. Available tools include a bread knife, a beer bottle cap, a big rock, a steel spoon. The bread knife is very dull and too thick to pierce the metal can. How can you open the can?	Yes	Step 1. Hold the spoon pointing down so it is touching the top of the can. Step 2. Hit the top of the spoon with the rock so that it drives the spoon into the can. Step 3. Once a hole forms, stick the spoon into it and press down very hard on the handle so that the can opens up more.
821	You have a can of beans for your picnic and realize you have forgotten your can opener. Available tools include a bread knife, a beer bottle cap, a big rock, a steel spoon. The bread knife is very dull and too thick to pierce the metal can. How can you open the can?	No	Unsolvable because nothing listed is capable of opening the can. The only object we could expect to be sharp has a dull and thick constraint. Nothing else is suitable.
823	You're hiking and would like to eat your boiled eggs, but they're too hot to peel. Available tools: a blanket, a water bottle, a sock, a hat. The blanket is a traditional down-filled type which can't be wet. How can you cool the eggs quickly to peel them?	Yes	Step 1. Use the sock as a sack to hold the eggs, assuming it's clean. If it isn't, use the hat. Step 2. Use water from the water bottle to cool the eggs by pouring it over the sock. Step 3. If they aren't cool enough to peel when the water's gone, let them sit in the wet sock for a little while first.
823	You're hiking and would like to eat your boiled eggs, but they're too hot to peel. Available tools: a blanket, a water bottle, a sock, a hat. The blanket is a traditional down-filled type which can't be wet. How can you cool the eggs quickly to peel them?	Yes	Step 1. Place the eggs in the hat to give it a safe place to sit. Step 2. Take the blanket and grab it with both hands and begin to fan it towards the eggs allowing the cool air it produces to cool them down. Step 3. Peel the cooled eggs and eat them.
825	You need to squeeze some lemons onto your seafood but don't have a lemon squeezer. Available tools: a fork with short tines, a plastic bag, and a water bottle with a small opening. How can you squeeze the lemons?	Yes	Step 1. Use the fork with short tines to puncture a lemon to allow the juice to escape. Step 2. Use the plastic bag to contain the lemon so it will catch the juice. Step 3. Use the water bottle to apply pressure to the lemon while it's within the bag to squeeze the juice out.
825	You need to squeeze some lemons onto your seafood but don't have a lemon squeezer. Available tools: a fork with short tines, a plastic bag, and a water bottle with a small opening. How can you squeeze the lemons?	Yes	Step 1. Take the fork and poke holes in one side of the lemon. Step 2. Take the side of the lemon with no holes and place it in the palm of your dominant hand and squeeze the lemon. Step 3. Allow the lemon juice that comes out to land on your seafood and add as much as desired.
828	You're at a diner and break your only plastic spoon while eating a sundae. Available tools: a straw, paper napkin, a business card that is too small, flimsy stir sticks. How can you create a makeshift scoop?	No	Unsolvable, because none of the items provided in the scenario can be used to make a makeshift scoop or spoon to eat the sundae efficiently.
828	You're at a diner and break your only plastic spoon while eating a sundae. Available tools: a straw, paper napkin, a business card that is too small, flimsy stir sticks. How can you create a makeshift scoop?	No	Unsolvable because none of the listed items are capable of forming a scoop. They are the wrong shape, flimsy, and too small, with no way to reasonably combine them.
831	You need to cut your pizza but don't have a pizza cutter. Available tools: a drinking glass, a credit card, a Swiss Army knife with a too small blade, and a pizza with a hard crust. How can you cut the pizza?	Yes	Step 1. Use the Swiss Army knife to make perforations across the slicing points of the pizza as well as soften the crust. Step 2. Use the credit card to drag along the perforations you created, cutting the pizza into slices.
831	You need to cut your pizza but don't have a pizza cutter. Available tools: a drinking glass, a credit card, a Swiss Army knife with a too small blade, and a pizza with a hard crust. How can you cut the pizza?	No	Unsolvable because the hard crust cannot be cut by the credit card or the drinking glass, and the Swiss Army knife's blade is too small.
836	A loved, well-read book has become worn with time. Its binding has fallen apart and you need to find a way to keep the pages intact and together. The tools at your disposal are a long, rotary phone cord, a shoelace, a belt, and a candle. However, the belt is too short to secure around the book. How should you keep the book pages from falling apart with these tools?	Yes	Step 1. Wrap the rotary phone cord around the book. Step 2. Secure the rotary phone cord by wrapping the shoelace around it and tie it.
836	A loved, well-read book has become worn with time. Its binding has fallen apart and you need to find a way to keep the pages intact and together. The tools at your disposal are a long, rotary phone cord, a shoelace, a belt, and a candle. However, the belt is too short to secure around the book. How should you keep the book pages from falling apart with these tools?	Yes	Step 1. Use the long, rotary phone cord to wrap and tie around the book, keeping the book pages from falling apart when the book is not being read.
839	Writing on the thousands of book pages in the library has now become a daunting task as you don't have a pen. You are left with eyeliner, a watercolor set, a cut-up soda can, and a piece of coal. Unfortunately, the piece of coal is too large and clumsily shaped for precision, and the eyeliner has dried out. What is your strategy to number the pages?	Yes	Step 1: Pour a color or more from the watercolor set into the cut-up soda can.
839	Writing on the thousands of book pages in the library has now become a daunting task as you don't have a pen. You are left with eyeliner, a watercolor set, a cut-up soda can, and a piece of coal. Unfortunately, the piece of coal is too large and clumsily shaped for precision, and the eyeliner has dried out. What is your strategy to number the pages?	No	Step 1. Go to a water fountain (which any library will likely have) or the restroom sink. Step 2. Moisten the watercolor set with water. Step 3. Dip the eyeliner pencil in the the watercolors and use it like a pen.
843	Recently, your desk at the library has begun to wobble interrupting your workflow. You have a stack of old magazines, an unused yoga mat, a roll of packing tape, and a small box of screws at your disposal. However, the stack of old magazines is not thick enough to stop the desk from wobbling. How will you stabilize your desk with these tools?	Yes	Step 1. Use the roll of packing tape to tape the yoga mat in a rolled or folded position, increasing its thickness. Step 2. Use the taped up yoga mat, possibly in conjunction with the stack of old magazines, to stabilize your desk.
843	Recently, your desk at the library has begun to wobble interrupting your workflow. You have a stack of old magazines, an unused yoga mat, a roll of packing tape, and a small box of screws at your disposal. However, the stack of old magazines is not thick enough to stop the desk from wobbling. How will you stabilize your desk with these tools?	Yes	Step 1. Use the yoga mat to stabilize the desk by folding it into as many layers as needed, then placing it under the problem leg. Step 2. Use packing tape to secure the mat's shape, rolling up any excess safely out of the way.
981	You need to pack your large guitar in a bag that's slightly too small. You have a tape measure, safety pins, fabric scraps, rubber bands, old socks, a broken scissor, and pieces of foam. However, all of the fabric scraps are silk, which does not provide enough cushioning for the guitar. How can you safely pack your guitar using these items?	Yes	Step 1. Use the pieces of foam for cushioning inside of the bag to protect the guitar. Step 2. Use the socks and the scraps of fabric to wrap around the exposed part of the guitar that doesn't fit in the bag. Step 3. Use the rubber bands to fasten the socks and fabric to the guitar to keep the protection secure.
985	You need to clean up a pile of sawdust in your garage, but you don't have a vacuum cleaner. Your tools are a bucket, a leaf blower, a drill, masking tape, a broom, a piece of cardboard, a water hose, a garbage bag, and a dustpan. The broom bristles are worn out and aren't able to collect smaller particles of sawdust. What can you do?	Yes	Step 1. Use the broom to sweep up as much of the sawdust as possible. Step 2. Sweep these pieces onto dustpan. Step 3. Use the sticky side of the masking tape to collect any smaller particles. Step 4. Throw all of this away into the garbage bag. Optional method: Step 1. Open the garage door. Step 2. Use the leaf blower to blow the sawdust out of the garage.
985	You need to clean up a pile of sawdust in your garage, but you don't have a vacuum cleaner. Your tools are a bucket, a leaf blower, a drill, masking tape, a broom, a piece of cardboard, a water hose, a garbage bag, and a dustpan. The broom bristles are worn out and aren't able to collect smaller particles of sawdust. What can you do?	Yes	Step 1. Use the dustpan to scoop up the bulk of the pile, placing the sawdust into the garbage bag. Step 2. Use the piece of cardboard as a makeshift broom to sweep up the smaller particles of sawdust.
991	Your garage door is squeaky and requires lubrication. The only problem is you don't have any lubricating oil. The items you have on hand include a pair of chopsticks, an old t-shirt, some fishing line, a roll of packing tape, climb chalk, an old shoelace, and a stick of butter. The butter is frozen and extremely hard, it can't be immediately applied to the garage door. What do you do?	Yes	Step 1. Use the old t-shirt and wrap it around the butter. Step 2. Use your body heat to slowly warm the butter that is wrapped in the t-shirt. Step 3. Use the now softened butter to lubricate the garage door.
991	Your garage door is squeaky and requires lubrication. The only problem is you don't have any lubricating oil. The items you have on hand include a pair of chopsticks, an old t-shirt, some fishing line, a roll of packing tape, climb chalk, an old shoelace, and a stick of butter. The butter is frozen and extremely hard, it can't be immediately applied to the garage door. What do you do?	No	Unsolvable. There is nothing that can lubricate the garage door, including the butter. Even if the butter worked, there's no way to unfreeze it to apply it.
993	You've received a large ice sculpture for the party that needs to be kept cold, but the refrigerator is not big enough. You have access to a large quilt, a folding chair, a picnic cooler, a garden hose, a flashlight, a small plastic pool, and a roll of aluminium foil. The small plastic pool has a hole in it and leaks water. How do you keep the ice sculpture cold using these items?	Yes	Step 1. Place the sculpture in the pool. This is to insulate it from the ground and does not need to hold water. Step 2. Wrap the sculpture in the large quilt to insulate it. Step 3. Wrap the garden hose around the blanket to secure it.
993	You've received a large ice sculpture for the party that needs to be kept cold, but the refrigerator is not big enough. You have access to a large quilt, a folding chair, a picnic cooler, a garden hose, a flashlight, a small plastic pool, and a roll of aluminium foil. The small plastic pool has a hole in it and leaks water. How do you keep the ice sculpture cold using these items?	No	Unsolvable. The sculpture wouldn't fit in the cooler, and every other available item would only heat or melt it instead of keeping it cool.
1004	You decided to sunbathe but forgot to bring your sun hat. Items available are a snorkeling fin, a hammock, a beach bag with a swimmies/water wings, a book, a paddleball set, a bottle of beach sand, and a long beach towel. The beach towel is a small hand towel and not large enough to provide adequate protection from the sun, the paddleball set doesn’t offer enough shade, the dictionary book is sma…	Yes	Step 1. Tear pages out of the book. Step 2. Fold the torn pages in accordion-fashion. Step 3. Weave the accordion-style folded pages in and out of the holes of the hammock, making sure to overlap slightly to ensure full coverage. Step 4. Lay on the ground with your head under the shaded part of the hammock so your face is protected from the sun.
1004	You decided to sunbathe but forgot to bring your sun hat. Items available are a snorkeling fin, a hammock, a beach bag with a swimmies/water wings, a book, a paddleball set, a bottle of beach sand, and a long beach towel. The beach towel is a small hand towel and not large enough to provide adequate protection from the sun, the paddleball set doesn’t offer enough shade, the dictionary book is sma…	No	Unsolvable because none of the listed items offer shade, given the constraints, or the ability to create a framework to hold it up and secure it in place.
1007	You want to create a splash of water at a specific point in your swimming pool but can't enter the water. Available tools: a pool noodle, a skateboard, a frying pan, a large flat piece of cardboard, a barbell, a long thin bamboo stick, a life jacket, a heavy rock, and a balloon filled with water. The stick is too weak and inflexible to support the water-filled balloon, the barbell is too heavy to…	Yes	Step 1. Use the frying pan to launch the water balloon to the desired location, by hand.
1339	You are visiting a remote island and realize you have forgotten your hairbrush. The available items are a piece of cardboard, a broken comb, a toothbrush, a rubber band, a towel, a hair dryer, a fork, and a bottle of sunblock. How can you style your hair without a brush using only these items?	Yes	Step 1. Use the fork very gently to straighten out the tangles in your hair, bit by bit. It will take a while, but it's your best option. Step 2. Use the rubber band to bind your hair into a ponytail if desired.
1339	You are visiting a remote island and realize you have forgotten your hairbrush. The available items are a piece of cardboard, a broken comb, a toothbrush, a rubber band, a towel, a hair dryer, a fork, and a bottle of sunblock. How can you style your hair without a brush using only these items?	Yes	Step 1. Use the comb to brush your hair, despite being broken it should function fairly well. Step 2. Use the fork as a makeshift comb if the broken comb is insufficient.
1353	You are at the basketball court, and the backboard breaks, making it impossible to play a proper game. However, you have a ragged, hole-ridden plywood board, a trampoline, a basketball, a pair of basketball shoes, a pool noodle, a water bottle, and a yoga strap. How can you create a makeshift basketball backboard using only these items?	No	Unsolvable because none of the listed items can reasonably replace the backboard, and, even if it could, there's no way to climb up to place it.
1353	You are at the basketball court, and the backboard breaks, making it impossible to play a proper game. However, you have a ragged, hole-ridden plywood board, a trampoline, a basketball, a pair of basketball shoes, a pool noodle, a water bottle, and a yoga strap. How can you create a makeshift basketball backboard using only these items?	No	Unsolvable, because none of the provided materials would be able to function as a suitable backboard and you have no reasonable means of securing it to the post.
885	You want to make a sun dial to judge time, but you have no sharp objects to make the gnomon. Available items are a hand mirror, a rubber band, a beach towel, a paper plate, a swim cap, a water bottle, a plastic spoon, a flip flop, and an inflatable ring. The trouble is, the water bottle is a collapsible one, does not stand upright. The inflatable ring has a leak, making it unable to hold air. You…	Yes	Step1 Use the paper plate as the base of the sun dial. Step2 Use the plastic spoon to poke a hole in the middle of the paper plate and insert the spoon. Step3 Tear the rubber band into pieces and use them to mark time on the paper plate. Step4 Use the shadow of the spoon on the paper plate to tell the time.
885	You want to make a sun dial to judge time, but you have no sharp objects to make the gnomon. Available items are a hand mirror, a rubber band, a beach towel, a paper plate, a swim cap, a water bottle, a plastic spoon, a flip flop, and an inflatable ring. The trouble is, the water bottle is a collapsible one, does not stand upright. The inflatable ring has a leak, making it unable to hold air. You…	No	Unsolvable because none of the listed items are capable of serving as the gnomon and base. They cannot be securely held in place at the correct angle, have constraints that render them useless, or have unsuitable shapes.
890	You are walking along the sidewalk and see a deep crack in the pavement, which could cause someone to trip. All you have is a pair of sock, a tube of tissue paper, a small bottle of drinking water, a notepad, a straw hat, a multicolored markers, a plastic spoon, and a scarf. The sock and the scarf are both light in color and not attention-grabbing. The marker's ink is dried out, making them usele…	Yes	Step 1. Drop the straw hat on the worst part of the crack. Step 2. Shove some of the markers in the straw hat to hold them up as visual indicators. Step 3. Wrap the scarf, and if needed the sock around the crack to highlight the rest.
890	You are walking along the sidewalk and see a deep crack in the pavement, which could cause someone to trip. All you have is a pair of sock, a tube of tissue paper, a small bottle of drinking water, a notepad, a straw hat, a multicolored markers, a plastic spoon, and a scarf. The sock and the scarf are both light in color and not attention-grabbing. The marker's ink is dried out, making them usele…	Yes	Step 1. Use the tissue paper to form a large flag, tearing and folding it as needed. Step 2. Use the plastic spoon to help tuck this tissue paper flag into the large crack to call attention to it, with extra folds to wedge it into place. Take the spoon with you, so it doesn't cause a tripping hazard itself.
899	You just bought a new smartphone and need a stand to watch videos, but do not have a phone stand. Available to you are a bottle of hand sanitizer, a coffee mug, a paperback book, a pencil, a safety pin, a set of keys, a pocket mirror, a pair of glasses, and a stack of sticky notes. The stack of sticky notes is too soft and collapses under the weight of the smartphone. How do you create a makeshif…	Yes	Step 1. Use the coffee mug to lean the phone against. Step 2. Use the set of keys as a stop in front of the phone to prevent it from sliding down.
899	You just bought a new smartphone and need a stand to watch videos, but do not have a phone stand. Available to you are a bottle of hand sanitizer, a coffee mug, a paperback book, a pencil, a safety pin, a set of keys, a pocket mirror, a pair of glasses, and a stack of sticky notes. The stack of sticky notes is too soft and collapses under the weight of the smartphone. How do you create a makeshif…	Yes	Step 1. Lean the phone against the hand sanitizer bottle. Step 2. Use the coffee mug and book to blank both bottom corners of the phone, situating sturdily as you can.
901	The windshield of your car is full of dirt, and you don't have water or a car wash liquid. Available tools: a can of oil, a plastic bag, a screwdriver, a soda, an umbrella, a towel, and a pair of socks. However, the towel is very small and thin, and the soda is a small can of diet soda. How do you clean the windshield using these items?	Yes	Step 1. Wipe the loose dirt off with the towel. Step 2. Dribble the soda over the glass. Step 3. Use the socks to wipe the glass clean and dry.
901	The windshield of your car is full of dirt, and you don't have water or a car wash liquid. Available tools: a can of oil, a plastic bag, a screwdriver, a soda, an umbrella, a towel, and a pair of socks. However, the towel is very small and thin, and the soda is a small can of diet soda. How do you clean the windshield using these items?	Yes	Step 1. Use the soda to rinse off the dirt and wet the windshield's surface. Step 2. Use the towel to wipe down the windshield and remove any remaining pieces of dirt.
1122	You have a paper clip, a pair of scissors, a piece of paper, a staple remover, a pencil, a straw, a very short and tight rubber band, a small cup, a glue stick, a ruler, an eraser, a half-full water bottle, and a plastic fork. How can you transfer the water from the bottle to the cup without touching the bottle or pouring the water directly from the bottle into the cup?	Yes	Step 1. Use the straw to suck in a moderate amount of water from the water bottle into your mouth. Step 2. Expel the water through the straw into the cup.
1122	You have a paper clip, a pair of scissors, a piece of paper, a staple remover, a pencil, a straw, a very short and tight rubber band, a small cup, a glue stick, a ruler, an eraser, a half-full water bottle, and a plastic fork. How can you transfer the water from the bottle to the cup without touching the bottle or pouring the water directly from the bottle into the cup?	Yes	Step 1. Use the straw to suck water from the bottle into the straw. Step 2. Plug the top of the straw with your finger so no water falls out. Step 3. Use the straw to transfer the water by placing it over the cup, removing your finger, the water will fall into the cup.
1124	You have a rubber eraser, a magnet, a paper clip, a ruler, a piece of paper, a can opener, a pencil sharpener, a short string, a pen, a highlighter, a pair of scissors, a coin, and a glue stick. How can you determine if the coin is made of a magnetic material without directly touching it with the magnet?	Yes	Step 1. Place the piece of paper over the coin. Step 2. Run the magnet over the area of the paper where the coin is and if it is magnetic you should feel the pull of the magnet against the coin without them ever touching.
1124	You have a rubber eraser, a magnet, a paper clip, a ruler, a piece of paper, a can opener, a pencil sharpener, a short string, a pen, a highlighter, a pair of scissors, a coin, and a glue stick. How can you determine if the coin is made of a magnetic material without directly touching it with the magnet?	Yes	Step1 Place the piece of paper right above the coin. Step2 Place the magnet close to the paper. Step3 You will feel the magnetic force from the magnet if the coin is made of a magnetic material. The magnet will not directly touch the coin since there is the paper sheet in between.
1140	How to fry an egg with only a campfire? I only have the following ingredients: an egg, and seasoning, cooking oil plus a can of beer, some sausages and a head of lettuce. I have the following utilities: a tent, firewood, matches, a collapsible water container, a campfire spot, a metal camping skillet, a camping chair, a metal spatula, and a solar charger. It's a windy day and the matches can't st…	Yes	Step 1. Use the tent and place it in front of the wind to create an area where you can start a fire without it quickly going out. Step 2. Use the firewood and matches to create a fire. Step 3. Use the skillet with cooking oil over the fire to fry the egg.
1140	How to fry an egg with only a campfire? I only have the following ingredients: an egg, and seasoning, cooking oil plus a can of beer, some sausages and a head of lettuce. I have the following utilities: a tent, firewood, matches, a collapsible water container, a campfire spot, a metal camping skillet, a camping chair, a metal spatula, and a solar charger. It's a windy day and the matches can't st…	Yes	You'll have to relocate the campfire spot so it's close to the tent entrance. Step 1. Assemble firewood. Step 2. Go inside tent to get away from the wind. Step 3. On the skillet, start a small fire with a match using small bits of firewood and leaves and kindling you may find. Step 4. Quickly transfer the fire from the skillet to the firewood assemblage. Step 5. When the fire is healthy, fry your…
1148	You need to wake up at a certain time, but the alarm clock isn't working. You have a baseball, a rubber band, a mirror, a glass of water, a candle, a phone with a broken speaker, a piece of chalk, and a metronome with a broken handle. How do you wake up without any other things available?	Yes	Step 1. Use the phone and set an alarm on it, make sure it is set to vibrate. Step 2. Use the glass, empty out the water then place the phone on top of it, as far off its balancing point as possible. Now when the alarm goes off the vibration will shake the phone off of the glass making a loud noise and waking you up.
1148	You need to wake up at a certain time, but the alarm clock isn't working. You have a baseball, a rubber band, a mirror, a glass of water, a candle, a phone with a broken speaker, a piece of chalk, and a metronome with a broken handle. How do you wake up without any other things available?	Yes	Step 1: Set the phone alarm to vibrate mode. Step 2: Place the phone next to your bed. Step 3. The phone should go off and the vibrations against the surface should produce enough noise to wake you up.
1149	You dropped your keys down a narrow drain. You have a plastic bag, a paper clip, a pair of chopsticks, a toothbrush, a weak magnet, duct tape, a length of string, a spoon, and a paper cup. How do you retrieve your keys without any other things available?	Yes	Step 1. Use the paperclip and unfurl it, forming a hook at one end. Step 2. Use the string and tie it to the other end of the paperclip. Step 3. Use string to lower the paperclip into the drain and hook onto the keys, slowly pull them up.
1149	You dropped your keys down a narrow drain. You have a plastic bag, a paper clip, a pair of chopsticks, a toothbrush, a weak magnet, duct tape, a length of string, a spoon, and a paper cup. How do you retrieve your keys without any other things available?	Yes	Step 1. Unfold the paperclip leaving one end extended out in the shape of a hook. Step 2. Attach the string to on end of the paperclip. Step 3. Low the string and paperclip down the drain and hook the keys with the paper clip. Step 4. Pull the keys upwards once hooked.
1152	Your soup is too hot but you don't have a fan. You have a paper plate, a cotton swab, a sponge, a napkin, a straw, a serving spoon, a fork, and ice cubes made from fruit juice. How can you cool down the soup without altering the taste?	Yes	Step 1. Use the paper plate to fan air at the soup, cooling it down.
1152	Your soup is too hot but you don't have a fan. You have a paper plate, a cotton swab, a sponge, a napkin, a straw, a serving spoon, a fork, and ice cubes made from fruit juice. How can you cool down the soup without altering the taste?	Yes	Step 1. Use the paper plate as a hand fan to fan the soup to cool it down.
1041	You want to make a long, winding track in the snow for your RC car, but all you have is a kettle, a slide projector, a barbecue brush, and a garden hose, along with a kitchen pot and a vacuum cleaner. Unfortunately, the garden hose is frozen solid, the barbecue brush bristles are too soft, the kettle is too hot to hold and the vacuum cleaner only has a sucking function, not a blow feature. How ca…	Yes	Step 1. Use the kitchen pot to remove snow so that the removed snow forms the shape of a track.
1041	You want to make a long, winding track in the snow for your RC car, but all you have is a kettle, a slide projector, a barbecue brush, and a garden hose, along with a kitchen pot and a vacuum cleaner. Unfortunately, the garden hose is frozen solid, the barbecue brush bristles are too soft, the kettle is too hot to hold and the vacuum cleaner only has a sucking function, not a blow feature. How ca…	Yes	Step 1. Use the kitchen pot to scoop snow and move it as needed to meet your vision. Step 2. Use the bottom of the kitchen pot to compact the "road" of the track for your RC car.
1051	You need a magnifying glass for your school science fair project to show small details of botanical samples, but you’ve forgotten yours. You have a paperclip, a balloon that is already inflated with air and has a tiny hole in it, some plastic wrap, a rubber band, some water, a cardboard and cookies. How can you create a makeshift magnifying glass with these items?	Yes	Step1 Deflate the balloon and fill it with water. Step2 Place the samples under the plastic wrap. Step3 Place the paperclip on the plastic wrap right above the sample. Step4 Use the tiny hole on the balloon to let a water drop fall onto the paperclip. Step5 Use the waterdrop as a magnifying glass.
1051	You need a magnifying glass for your school science fair project to show small details of botanical samples, but you’ve forgotten yours. You have a paperclip, a balloon that is already inflated with air and has a tiny hole in it, some plastic wrap, a rubber band, some water, a cardboard and cookies. How can you create a makeshift magnifying glass with these items?	No	Unsolvable, because none of the provided materials would provide adequate magnification. There may be some solution that involves the water as a form of magnification, but this would not have nearly the precision needed.
1063	You want to grow your own seedlings, but you don't have small pots. Tools available include a cup, a spoon, a marker, a roll of plastic wrap, a small kitchen knife, a pair of scissors, an egg carton, a plate, and a bottle of water. The seeds need to be planted very deep, deeper than the wells in an egg carton. How can you grow seedlings using only these items?	Yes	Step1 Use the knife to poke a few holes at the bottom of the cup. Step2 Fill the cup with soil. Step3 Plant the seeds inside the cup with the spoon. Step4 Place the cup on the plate and water the seeds. Step5 Write the name of the seeds on the cup with the marker.
1063	You want to grow your own seedlings, but you don't have small pots. Tools available include a cup, a spoon, a marker, a roll of plastic wrap, a small kitchen knife, a pair of scissors, an egg carton, a plate, and a bottle of water. The seeds need to be planted very deep, deeper than the wells in an egg carton. How can you grow seedlings using only these items?	Yes	Step 1. Use the kitchen knife to cut out the bottoms of all the wells in the egg carton as well as cutting a hole in the center to fit around the water bottle for standing support. Step 2. Use the plastic wrap to create deeper wells in each of the spots in the egg carton. Step 3. Use bottle in the center to support this makeshift planter and fill the wells with as much soil as needed.
1234	You have a belt, and the buckle has broken off. You own a box of staples, a leftover piece of leather, a small fire starter (for melting), a sewing kit, sturdy wire, a tube of lipstick, and a rubber band. However, you've misplaced the fire starter. How do you repair the belt?	Yes	Step 1. Use the sewing kit to reattach the buckle to the belt. Step 2. Use the rubber band to secure it further if necessary.
1234	You have a belt, and the buckle has broken off. You own a box of staples, a leftover piece of leather, a small fire starter (for melting), a sewing kit, sturdy wire, a tube of lipstick, and a rubber band. However, you've misplaced the fire starter. How do you repair the belt?	Yes	Step 1. Use the tube of lipstick as an aid to shape the sturdy wire into a replacement buckle, within the existing buckle holding end of the belt. Step 2. To trim off any excess wire, kink it and bend it rapidly back and forth until it breaks, tucking the jagged end safely inside the belt's end when finished.
1237	The lock on your suitcase is broken and you have important items inside. You have a piece of string, a hair tie, a rubber eraser, a belt, a nail file, a shoe lace, and a paperclip. The suitcase is a large industrial-size one and the belt won't wrap completely around it. How would you secure the suitcase?	No	Unsolvable because the listed items cannot replicate the function of the lock. The shoelace could be used to extend the belt, but this makeshift strap would not be secure. Nothing else is suitable.
1237	The lock on your suitcase is broken and you have important items inside. You have a piece of string, a hair tie, a rubber eraser, a belt, a nail file, a shoe lace, and a paperclip. The suitcase is a large industrial-size one and the belt won't wrap completely around it. How would you secure the suitcase?	Yes	Step 1. Fasten the piece of string to the end of the belt to create a longer tie. Step 2. Use this makeshift tie and wrap it around the suitcases then knot it tightly.
1253	There's a small leak at the bottom of your ceramic living room vase. You have a tea bag, some old newspapers, a hairdryer, a feather duster, a tiny clay piece, a spoon, clear nail polish, and a candle. But the nail polish is already dry and unusable. How would you fix the leak?	Yes	Step 1. Use the tiny clay piece to patch the area of the ceramic living room vase that has the leak. Step 2. Use the spoon to press and smooth the clay onto the ceramic living room vase fully. Step 3. Use the hairdryer to dry and harden the clay onto the ceramic living room vase.
1253	There's a small leak at the bottom of your ceramic living room vase. You have a tea bag, some old newspapers, a hairdryer, a feather duster, a tiny clay piece, a spoon, clear nail polish, and a candle. But the nail polish is already dry and unusable. How would you fix the leak?	Yes	Step 1: use the hairdryer to heat the candle until wax drops into the vase and over the leak.
1258	You have a helium-filled balloon, a ruler, a pair of scissors, some sticky notes, a paper clip, a tall bookshelf, a pendant, a piece of string, and a wine cork. The pendant turns out to be too lightweight to act as a functional weight. How can you display the balloon in a way that it doesn't float away?	Yes	Step 1. Use the piece of string and tie it to the bottom of the balloon. Step 2. Use the bookshelf as a weight by slightly tipping it then wedging the string underneath, this will be more than enough weight to keep the balloon from floating away.
1258	You have a helium-filled balloon, a ruler, a pair of scissors, some sticky notes, a paper clip, a tall bookshelf, a pendant, a piece of string, and a wine cork. The pendant turns out to be too lightweight to act as a functional weight. How can you display the balloon in a way that it doesn't float away?	Yes	Step 1. Tie one end of the string to the balloon. Step 2. Tie the other end to one end of the ruler. Step 3. Place the ruler on the top shelf of the bookcase, so that the balloon is away from the shelf and in full display mode. Step 4. Place the scissors, sticky notes, pendant, and cork along the length of the ruler to weigh it down.
1260	You have a shredded pillow, a hanger, a safety pin, old T-shirts, a paintbrush, a needle, no thread, a measuring spoon, shoelaces, and a pillowcase. But the shoelaces are too thick to fit through the eye of the needle. How can you mend the pillow?	Yes	Step 1. Place some of the old T-shirts over the shredded pillow. Step 2. Tie off the end of the T-shirts with the shoelaces to stop them from moving around. Step 3. Place the pillow into the pillowcase Step 4. Use the safety pin to close off the pillowcase.
1260	You have a shredded pillow, a hanger, a safety pin, old T-shirts, a paintbrush, a needle, no thread, a measuring spoon, shoelaces, and a pillowcase. But the shoelaces are too thick to fit through the eye of the needle. How can you mend the pillow?	Yes	Step 1. Use old T-shirts as thread by pricking them with the safety pin and pulling on a loose thread to unravel them. Step 2. Use thread from old T-shirts to mend pillow by placing one end through the eye of the needle and pulling until an appropriate length is reached.
1088	You need to catch a fish but you don't have a fishing rod. You have a safety pin, a beach towel, a knife, a bread slice, a can of tuna, a bottle cap, a piece of string, and a branch. However, the branch is too short to reach the water from the bank. How do you catch a fish?	Yes	Step 1. Use the knife to smooth the branch and carve one end into a sharp point. Step 2. Use this pointed branch to spear a fish.
1088	You need to catch a fish but you don't have a fishing rod. You have a safety pin, a beach towel, a knife, a bread slice, a can of tuna, a bottle cap, a piece of string, and a branch. However, the branch is too short to reach the water from the bank. How do you catch a fish?	Yes	Step 1. Use the safety pin and tie the string to it while it is open. Step 2. Use the branch and tie the string to the end of it. Step 3. Use this makeshift fishing pole to catch a fish, the increased length from the string should allow it to reach the water.
962	You need to water a far-off vegetable patch, but the hose doesn't reach that far and your watering can has a hole. Tools available: a small cooking pan, a piece of cloth, a roll of plastic wrap, a shovel, a large pot, and a wheelbarrow. The wheelbarrow wheel is missing. The plastic wrap is thin and tears easily. How would you water the crops using only these items?	Yes	Step 1. Use the large pot to capture water from the hose. Step 2. Carry the large pot to the vegetable patch to water the plants.
962	You need to water a far-off vegetable patch, but the hose doesn't reach that far and your watering can has a hole. Tools available: a small cooking pan, a piece of cloth, a roll of plastic wrap, a shovel, a large pot, and a wheelbarrow. The wheelbarrow wheel is missing. The plastic wrap is thin and tears easily. How would you water the crops using only these items?	Yes	Step 1. Stretch the hose as far as it goes in the direction of the vegetable patch. Step 2. Fill the wheelbarrow with water. Step 3. Scoop water from the wheelbarrow using the pot. Step4. Take the pot of water over to the vegetables and water them. Step 5: Go back to the wheelbarrow and refill the pot and repeat the process until all of the vegetables are watered.
964	You need to build a temporary fence to separate two quarreling animals, but have no fencing materials. Tools available: a roll of twine, a bag of zip ties, a stack of wooden pallets, a bucket of paint, a crowbar, and a sledgehammer. The sledgehammer is very heavy to lift. The pallets are fragile and cannot support much weight. How can you build the fence using only these items?	No	Unsolvable because quarreling animals are angry, and forceful in trying to reach each other, even through a fence. The listed items are not capable of keeping them separated. The pallets are fragile and we lack anything capable of serving as sturdy framework to hold a make-shift fence in place.
1274	The hoop for your basketball game is broken, but the game must go on. You have a hammer, a hula hoop, a carabiner, some duct tape which doesn't have enough adhesive to keep the trash can attached to the hula hoop, a roll of thin wire, an inflatable beach ball, rope, a stepladder, and a trash can without a bottom. How do you set up an alternative hoop?	Yes	Step 1. Use the carabiner to cut the inflatable beach ball into thin strips. Step 2. Use the stepladder to climb up the rim. Step 3. Attach the cut up strips of the beach ball to the rim by using the roll of thin wire. This can be done by interlacing the rim and each strip of cut beach ball. Step 4. Use the duct tape to cover up all exposed parts of the thin wire and also to reinforce the beach b…
1274	The hoop for your basketball game is broken, but the game must go on. You have a hammer, a hula hoop, a carabiner, some duct tape which doesn't have enough adhesive to keep the trash can attached to the hula hoop, a roll of thin wire, an inflatable beach ball, rope, a stepladder, and a trash can without a bottom. How do you set up an alternative hoop?	Yes	Step 1. Use the wire to lash the bottomless trash can to the step ladder, high enough up off the ground for a ball to pass through.
1310	You're on a trip and forgot your toothbrush. You have baking soda, a coffee stirrer, a small towel, a clean washcloth, a piece of floss, toothpaste, a straw, and chewing gum. However, you are currently in a place with no access to clean water. How can you maintain oral hygiene?	Yes	Step 1. Use the washcloth, wrapped around your finger, to scrub off your teeth. Step 2. Use the piece of floss to floss your teeth.
1310	You're on a trip and forgot your toothbrush. You have baking soda, a coffee stirrer, a small towel, a clean washcloth, a piece of floss, toothpaste, a straw, and chewing gum. However, you are currently in a place with no access to clean water. How can you maintain oral hygiene?	Yes	steps put toothpaste in your hands rub it on your tooth and scrub back and fort spit out and use the floss to clean area that are hard to reach
1010	You're trying to collect rainwater for your plants but don't have any buckets. Tools provided: a wide-brimmed hat, a football, plastic cups, two long bamboo poles, a barbecue grill, a lawnmower bag, a small plastic kiddie pool, garden shears, and string. The hat is a straw hat, the football is too small to hold a lot of water, the barbecue grill has holes, and the plastic cups cannot catch much w…	Yes	Step 1. Use the small plastic kiddie pool to catch rainwater.
1010	You're trying to collect rainwater for your plants but don't have any buckets. Tools provided: a wide-brimmed hat, a football, plastic cups, two long bamboo poles, a barbecue grill, a lawnmower bag, a small plastic kiddie pool, garden shears, and string. The hat is a straw hat, the football is too small to hold a lot of water, the barbecue grill has holes, and the plastic cups cannot catch much w…	Yes	Step 1: Inflate the kiddie pool. That will collect the rainwater. Step 2: use the plastic cups to slowly take the water from the pool to the plants.
1011	You need to start a small water flow on top of a hill to observe the erosion patterns, but there is no natural water source nearby. Tools available: a hammer, a bucket, a big plastic bottle filled with water, a nail, duct tape, a shovel, a rope, an empty paint can, and a long garden hose with one end sealed. However, the hose is crimped or damaged, preventing water from flowing evenly down the hi…	No	Unsolvable. If the hose isn't reliable and there's no way to fix it, there's no way to maintain the flow.
1011	You need to start a small water flow on top of a hill to observe the erosion patterns, but there is no natural water source nearby. Tools available: a hammer, a bucket, a big plastic bottle filled with water, a nail, duct tape, a shovel, a rope, an empty paint can, and a long garden hose with one end sealed. However, the hose is crimped or damaged, preventing water from flowing evenly down the hi…	Yes	Step 1. Use the plastic bottle filled with water to serve as a water source on top of the hill. Step 2. Use the hammer to drive the nail to puncture a hole near the bottom of the plastic bottle, allowing the water to flow out in a small, steady stream to study the erosion patterns.
1016	The above-ground pool in your backyard is filled with leaves, and you don't own a pool skimmer. Tools available include a large mop, a long rope, a piece of mesh fabric, a plastic bucket, scissors, pool floaties, some duct tape, a couple of pool noodles, and zip ties. However, the mop handle is too short to reach the entire pool. How can you remove the leaves from the pool with these items?	Yes	Step 1: put the pool noodles side by side, so they can reach across the pool.
1016	The above-ground pool in your backyard is filled with leaves, and you don't own a pool skimmer. Tools available include a large mop, a long rope, a piece of mesh fabric, a plastic bucket, scissors, pool floaties, some duct tape, a couple of pool noodles, and zip ties. However, the mop handle is too short to reach the entire pool. How can you remove the leaves from the pool with these items?	Yes	tie the mesh fabric to one end of the pool noodle with the rope use it as a makeshift pool skimmer skim all the leaves and place them in the bucket
1027	You've anchored your boat near a small island for picnic and suddenly discover a leak. Your repair kit is unfortunately back at home. The only items on board are a book about marine biology, a large beach towel, a fishing rod, a snorkeling gear, an empty soda can, a bottle of sunblock, a lunchbox filled with sandwiches, and a wooden cutting board with a large crack in it. How can you temporarily …	Yes	Step 1. Use the towel as a plug for the hole by bunching it up and fitting it very tightly in it.
1027	You've anchored your boat near a small island for picnic and suddenly discover a leak. Your repair kit is unfortunately back at home. The only items on board are a book about marine biology, a large beach towel, a fishing rod, a snorkeling gear, an empty soda can, a bottle of sunblock, a lunchbox filled with sandwiches, and a wooden cutting board with a large crack in it. How can you temporarily …	Yes	step 1: rub the sunblock around the towel 2: force the towel through the leak hole 3: add more sunblock for water resistance
916	The rain has caused a power cut and you can't see anything in your room. The only illuminating tool you have is a small candle. A small candle, a lunchbox, knitting needles, a disposable foam cup, a toy car, aluminum foil, a paper fan, a pair of glasses, and a bottle of water are your available tools during a power cut caused by rain. The glasses have a curved surface and cannot sit flat on the a…	Yes	Step 1. Use the aluminum foil to create a reflective surface with large fold at the bottom to rest the candle on.
916	The rain has caused a power cut and you can't see anything in your room. The only illuminating tool you have is a small candle. A small candle, a lunchbox, knitting needles, a disposable foam cup, a toy car, aluminum foil, a paper fan, a pair of glasses, and a bottle of water are your available tools during a power cut caused by rain. The glasses have a curved surface and cannot sit flat on the a…	Yes	Step 1: make a circular form with the aluminum foil, as large as possible. Step 2: place the candle at the center of it. Step 3: turn the edge of the aluminum foil upwards, making the foil circle into a concave shape. This should reflect and boost the candle's light.
933	You need to level a shelf, but you don't have a level. You have a book, a dinner plate, pieces of cardboard, some hot glue, a marble, a stapler and a pair of scissors. The book has a hard cover that is uneven, not allowing the marble to consistently roll. How can you create a makeshift leveling tool with these items?	Yes	Step 1. Cut 2 even strips of the cardboard the same length of the dinner plate. Step 2. Attach these strips to the dinner plate using the hot glue. Make sure to attach them parallel to each other and the width of the marble. Step 3. Place the marble into this carboard strip channel. Step 4. Place the dinner plate level onto the shelf. Make sure the marble is in the middle of the plate. The moveme…
933	You need to level a shelf, but you don't have a level. You have a book, a dinner plate, pieces of cardboard, some hot glue, a marble, a stapler and a pair of scissors. The book has a hard cover that is uneven, not allowing the marble to consistently roll. How can you create a makeshift leveling tool with these items?	Yes	Step 1. Put the marble directly onto the shelf (forge the book) and see if it rolls. If it does, the shelf is uneven.
937	You need to grind whole black peppercorns for a recipe, but your pepper mill is broken. Tools available: a plastic cup, a wooden spoon, a table fork, a glass jar, a cheese grater, a paper bag, an egg whisk, and a small plate. The peppercorns are unusually hard and the wooden spoon is rather flimsy. How can you grind the peppercorns using only these items?	No	Unsolvable because the peppercorns are unusually hard. Nothing listed is capable of safely grinding them. The grater is unsafe and unsuitable due to a peppercorn's small size and their hardness. A fork has blunt tines, and a whisk has flimsy wire with wide openings, so neither of these can be used with hard peppercorns.
937	You need to grind whole black peppercorns for a recipe, but your pepper mill is broken. Tools available: a plastic cup, a wooden spoon, a table fork, a glass jar, a cheese grater, a paper bag, an egg whisk, and a small plate. The peppercorns are unusually hard and the wooden spoon is rather flimsy. How can you grind the peppercorns using only these items?	Yes	Step 1. Place the cheese grater on top of the small plate. Step 2. Place some peppercorns on top of the cheese grater. Step 3. Use the wooden spoon to roll the peppercorns along the cheese grater, breaking them up into smaller pieces. Step 4. Place these smaller pieces of peppercorn into the glass jar for later use.
2047	A small, slightly rusted key is stuck in an old iron door lock. The materials at your disposal are a handy Ticonderoga pencil, a fragile white plastic spoon, a small, unscented tealight candle, a compact hairdryer with only a warm setting, a regular-sized metallic nail file, and a pair of blunt-ended steel tweezers. However, the tweezers are blunt-ended and lack the necessary grip, and the hair d…	Yes	Step 1. Use the big end of the hairdryer to pound on the part of the rusted stuck key that is exposed. Keep doing this until the key is not stuck anymore. Step 2. Pull the key out.
2047	A small, slightly rusted key is stuck in an old iron door lock. The materials at your disposal are a handy Ticonderoga pencil, a fragile white plastic spoon, a small, unscented tealight candle, a compact hairdryer with only a warm setting, a regular-sized metallic nail file, and a pair of blunt-ended steel tweezers. However, the tweezers are blunt-ended and lack the necessary grip, and the hair d…	Yes	light the candle and drop some wax on the key use the blunt ended tweezer to hold on to the edge of the rusted key wiggle it left and right slowly to free the key
2049	The wooden door to your room doesn't stay closed due to loose brass hinges, and you don't have a screwdriver handy. At your disposal, you have a bottle of multi-purpose adhesive glue, a long, stretchy rubber band, a disposable plastic knife from a takeaway restaurant, a copper penny, a flattened popsicle stick, and a regular-sized white bar of soap. However, the knife is a plastic one which is in…	No	Unsolvable, because none of the items provided can function as a makeshift screwdriver and you need more proper tools to tighten the hinges.
2049	The wooden door to your room doesn't stay closed due to loose brass hinges, and you don't have a screwdriver handy. At your disposal, you have a bottle of multi-purpose adhesive glue, a long, stretchy rubber band, a disposable plastic knife from a takeaway restaurant, a copper penny, a flattened popsicle stick, and a regular-sized white bar of soap. However, the knife is a plastic one which is in…	Yes	Step 1: Use the copper penny to screw in the brass hinges. No further steps needed.
2070	You are out enjoying a sunny picnic in the park when a round, lightweight plastic ball gets tangled in a tree. The branches are dense and cluttered, making it impossible to throw anything through to knock the ball down. Your picnic supplies include a family-sized, foil-sealed bag of potato chips; a 10-meter long, sturdy rope; a 1-liter empty water bottle; a broom with a 5 ft long wooden handle an…	Yes	Step 1. Use the broom to knock the ball down by holding on to the very end of the handle and nudging the ball with the tip of the bristles.
2071	You are fishing in the park by a tranquil, clear pond when your fishing line gets tangled in a branch that is out of reach. Available to you is a sturdy cap made of dense fabric, a 2-meter-long multi-purpose string, a Swiss pocket knife with multiple tools, a light-weight plastic water bottle, a hollow wooden walking stick about 1.5 meters long, and some chewy snacks in a plastic wrapper. The bra…	Yes	Step 1: Tie the 2-meter long string around the bottom of the walking stick to create a makeshift lasso Step 2: Toss the walking stick up toward the branch and try to catch the hooked handle onto the branch Step 3: when the walking stick is caught on the branch, sharply tug on the string until the branch breaks Step 4: use the string to reel in the bundle of walking stick, branch, and fishing line…
2071	You are fishing in the park by a tranquil, clear pond when your fishing line gets tangled in a branch that is out of reach. Available to you is a sturdy cap made of dense fabric, a 2-meter-long multi-purpose string, a Swiss pocket knife with multiple tools, a light-weight plastic water bottle, a hollow wooden walking stick about 1.5 meters long, and some chewy snacks in a plastic wrapper. The bra…	Yes	Step 1. Use the multi-purpose string with the walking stick to make a lasso. Step 2. Use the lasso on the walking stick to loop around the branch. Step 3. Use the walking stick to pull the branch with the tangled fishing line to shore. Step 4. Use a dull tool in the Swiss pocket knife to help loosen tangles in the fishing line.
2072	After a wonderful picnic in the park, your car gets stuck deep in squelchy mud in a remote park's parking lot. The items in your possession are a filled aluminum water bottle, your kid's tiny, plastic toy car, a thin cotton picnic blanket that tears easily, a wicker picnic basket with a hinged lid, a frisbee made of hard plastic, and a laminated map of the park. The picnic blanket fails to give y…	Yes	Step 1. Use the hard frisbee to dig a small depression out of the mud in front of each of your car's drive wheels to give yourself some space. Step 2. In front of one of the cars drive wheels, use the laminated map to pack the mud down. Step 3. Leave the map in place in the small depression in front of that wheel to create a smooth, relatively dry surface Step 4. Press the hard frisbee down into …
2072	After a wonderful picnic in the park, your car gets stuck deep in squelchy mud in a remote park's parking lot. The items in your possession are a filled aluminum water bottle, your kid's tiny, plastic toy car, a thin cotton picnic blanket that tears easily, a wicker picnic basket with a hinged lid, a frisbee made of hard plastic, and a laminated map of the park. The picnic blanket fails to give y…	No	Unsolvable, because none of the items provided will be able to give the car enough traction to escape the mud and something more solid and sturdy is needed or sand/kitty litter.
2073	You are in a bustling park and need to erect a sign post for a forthcoming event, without any usual tools like nails or a hammer. The items you got are a pair of square-framed glasses, a thin stick about half a meter long, a large colorful picnic blanket, a woolen hat, an expansive paper map of the park, and a roll of highly adhesive duct tape. The stick is flimsy and not long enough to be affixe…	Yes	use the stick as a base write the sign on the expansive paper spread the paper put the stick into the ground use the duct tape to secure one end of the paper on one side and then do same on the other side
2073	You are in a bustling park and need to erect a sign post for a forthcoming event, without any usual tools like nails or a hammer. The items you got are a pair of square-framed glasses, a thin stick about half a meter long, a large colorful picnic blanket, a woolen hat, an expansive paper map of the park, and a roll of highly adhesive duct tape. The stick is flimsy and not long enough to be affixe…	Yes	Step1 Write the sign on the back of the map. Step2 Use duct tape to attach the stick to the other side of the map to make it sturdy. Step3 Wrap the blanket over a sturdy branch of the tree. Step4 Duct tape the map onto the blanket.
2075	While enjoying a day in the park, you find that the mechanical lock on your bike, compromised by rust, is jammed and won't open with your key. Among your possessions are your smartphone with all its apps, a stainless steel water bottle, a fluffy picnic blanket, a trusty pencil with a hard eraser, a bag of crunchy chips sealed by a metal clip, and a pair of sleek, polarized sunglasses. Efforts to …	Yes	Step1: Use the pencil eraser to scrape off as much rust as possible from the keyhole. Step 2: Take the temples of the sunglasses from their hinges. Step 3: unfold the metal clip. Step 4: use a combination of the clip and the temples of the sunglasses to try to pick the lock.
2075	While enjoying a day in the park, you find that the mechanical lock on your bike, compromised by rust, is jammed and won't open with your key. Among your possessions are your smartphone with all its apps, a stainless steel water bottle, a fluffy picnic blanket, a trusty pencil with a hard eraser, a bag of crunchy chips sealed by a metal clip, and a pair of sleek, polarized sunglasses. Efforts to …	No	Unsolvable because the rusted layers prevent access to the lock mechanism, and the listed items aren't capable of removing the rust.
2078	You've finished your picnic and started cleaning up, but the park's public bins are full. You need a way to carry your trash home. Unfortunately, you have a plastic toy car with smooth wheels, a ball of robust twine, a hardcopy of a novel, a portable radio that's playing classical music, and an unused picnic blanket made out of thin nylon material which can't support the trash's weight. Given the…	No	Unsolvable because nothing we have is capable of containing the trash, and we lack the needed tools which would allow us to make one.
2078	You've finished your picnic and started cleaning up, but the park's public bins are full. You need a way to carry your trash home. Unfortunately, you have a plastic toy car with smooth wheels, a ball of robust twine, a hardcopy of a novel, a portable radio that's playing classical music, and an unused picnic blanket made out of thin nylon material which can't support the trash's weight. Given the…	No	Unsolvable. Nothing can carry the trash.
2092	A late blooming lavender bush in your garden has grown excessively tall and needs to be pruned, but you don't possess a ladder or a long-reach pruner. Available to you are a sturdy wheelbarrow with a flat tire, a hardwood broomstick that's five feet long, a standard steel shovel with a worn grip, a half-used roll of gray duct tape that lacks in strength and adhesiveness, a metal-tined rake, a fif…	No	Unsolvable, because none of the tools or items provided can safely and efficiently give you enough height, reach, or sharpness to prune the lavender bush.
2092	A late blooming lavender bush in your garden has grown excessively tall and needs to be pruned, but you don't possess a ladder or a long-reach pruner. Available to you are a sturdy wheelbarrow with a flat tire, a hardwood broomstick that's five feet long, a standard steel shovel with a worn grip, a half-used roll of gray duct tape that lacks in strength and adhesiveness, a metal-tined rake, a fif…	No	Unsolvable. While there are ways to extend the reach of the pruner, there's no reliable way to then operate it, namely to close and open it so it actually prunes.
1745	You need to move several bottles of an expensive, vintage wine, but you don't have a high-quality wine carrying case and they can't jostle or come into contact with each other. You have a mildew-resistant cooler box, thin rubber bands, terry cloth towels, a pair of stretchable jeans, a flimsy shower cap, and some coarse paper plates. However, the towels you own are thin beach towels that provide …	Yes	Step 1. Use the cooler box to hold the bottles, carefully placing them inside. Step 2. Use the coarse paper plates to keep the bottles separated, layering them between the bottles.
1745	You need to move several bottles of an expensive, vintage wine, but you don't have a high-quality wine carrying case and they can't jostle or come into contact with each other. You have a mildew-resistant cooler box, thin rubber bands, terry cloth towels, a pair of stretchable jeans, a flimsy shower cap, and some coarse paper plates. However, the towels you own are thin beach towels that provide …	Yes	Step 1. Use the beach towels and fold them over themselves to make them thicker. Step 2. Use the towels and wrap them around the bottles. Step 3. Wrap a rubber band around each bottle, securing the towels. Step 4. Use the remaining materials, such as torn up paper plates and the jeans as further shock absorption if needed.
1752	You're packing your range of china dolls for removal, but you're out of foam peanuts. You have cling wrap, beautifully-embroidered clothes, sturdy cardboard boxes, scented tissue paper, multi-colored rubber bands, shiny wrapping paper, and rice-filled socks with fun prints. The dolls boast intricate, fine details that could falsely be portrayed as etched by the coarse fabric of the detailed cloth…	Yes	Step 1: Wrap the china dolls with the wrapping paper, using the rubber bands to hold it on. Step 2: Wrap cling wrap around the wrapped dolls, to make sure each individual package stays together. Step 3: place the clothes at the bottom of the boxes. Step 4: place the wrapped dolls inside the boxes, on top of the clothes. Step 5: use the rest of the clothes, if any, as well as balls of tissue paper…
1752	You're packing your range of china dolls for removal, but you're out of foam peanuts. You have cling wrap, beautifully-embroidered clothes, sturdy cardboard boxes, scented tissue paper, multi-colored rubber bands, shiny wrapping paper, and rice-filled socks with fun prints. The dolls boast intricate, fine details that could falsely be portrayed as etched by the coarse fabric of the detailed cloth…	Yes	Step 1. Use cling wrap to wrap each individual doll in many layers. Step 2. Use the embroidered clothes to form a cushioned layer in the bottom of a sturdy box. Step 3. Use a rice filled sock along each wall of the box, then lay the dolls between the socks in layers, alternating with layers of tissue paper until the box is almost full. Step 4. Use another layer of embroidered clothing to cushion …
1753	You are planning to move a tall rubber plant in a heavier-than-usual ceramic pot, but you don't have the option of using a wagon or dolley. However, in your possession, you have a soft, stretchy piece of cloth, old disintegrating newspapers which can't support the weight, a vintage skateboard with unaligned wobbly wheels which renders it too unstable to bear the plant pot, a wicker broom, a small…	No	Unsolvable because of the constraints. The skateboard is too unstable and the pot is too heavy. Nothing listed is capable of serving as a makeshift dolly or an alternative to safely move the pot.
1753	You are planning to move a tall rubber plant in a heavier-than-usual ceramic pot, but you don't have the option of using a wagon or dolley. However, in your possession, you have a soft, stretchy piece of cloth, old disintegrating newspapers which can't support the weight, a vintage skateboard with unaligned wobbly wheels which renders it too unstable to bear the plant pot, a wicker broom, a small…	Yes	Step1: Lay out the stretchy cloth on the ground. Step2: Carefully lay the pot on the cloth. Step3: Slowly and gradually pull the cloth by the edges, pulling the pot towards the car.
1755	The single utility light bulb in your congested garage has just stopped working, leaving you in complete darkness. Available to you are a narrow mirror with a small reflective surface, a piece of opaque glass, a tiny beeswax candle, an old, hole-ridden metal bucket with a rusty interior that fails to reflect light, some crumpled tin foil, and a phone with a dim flashlight function. Can you produc…	Yes	step one: place the candle inside the bucket step 2: line the tin foil around the inside of the bucket as this would amplify the light of the candle. step 3: the small mirror could amplify the light further if you can place it on the side of the bucket
1755	The single utility light bulb in your congested garage has just stopped working, leaving you in complete darkness. Available to you are a narrow mirror with a small reflective surface, a piece of opaque glass, a tiny beeswax candle, an old, hole-ridden metal bucket with a rusty interior that fails to reflect light, some crumpled tin foil, and a phone with a dim flashlight function. Can you produc…	Yes	Step 1. Set the unlit candle aside so that you can find it easily later. We have no way of lighting the candle, so we will have to remember its location in the dark. Step 2. Smooth out the crumpled tin foil so that you have a flat, shiny surface Step 3. Fold the tin foil out to create an angled screen around the sides of the small mirror, this will allow low levels of light to be directed outward…
1756	Your old, rusty garage shelf, heavily loaded with greased, heavy engine parts, is dangerously close to crashing. Unfortunately, you don't have sturdy clamps to secure it. However, you do have access to a lightweight, inflatable volleyball, a spare tire that cannot withstand the weight of the shelf, a wooden garden hoe with a porous and splintered handle, an old threadbare rug, a thin rope insuffi…	No	Unsolvable because the listed items are not capable of safely and securely reinforcing the shelf.
1756	Your old, rusty garage shelf, heavily loaded with greased, heavy engine parts, is dangerously close to crashing. Unfortunately, you don't have sturdy clamps to secure it. However, you do have access to a lightweight, inflatable volleyball, a spare tire that cannot withstand the weight of the shelf, a wooden garden hoe with a porous and splintered handle, an old threadbare rug, a thin rope insuffi…	Yes	steps place the ply wood under the shelf to tilt the shelf backward to enable it rest on the wall and this would prevent it from falling
1762	1762 Your task is to label an assortment of corrugated storage boxes in your garage. However, you don't have a marker or labels. Your resources are an empty, cracked water bottle, dull scissors, an old magazine with faded ink, a half-used candle, a nearly-dried-up ballpoint pen, and strips of wrinkled, brightly colored duct tape. The duct tape doesn't adhere well due to the conditions in the gara…	No	Unsolvable because there is nothing capable of making a label or affixing it to the boxes. The magazine ink is faded, the ball point pen's ink is light, and the duct tape doesn't adhere well.
1762	1762 Your task is to label an assortment of corrugated storage boxes in your garage. However, you don't have a marker or labels. Your resources are an empty, cracked water bottle, dull scissors, an old magazine with faded ink, a half-used candle, a nearly-dried-up ballpoint pen, and strips of wrinkled, brightly colored duct tape. The duct tape doesn't adhere well due to the conditions in the gara…	Yes	cut the magazines write with the dried out pen on them use the duct tape to secure the magazine to the container
1771	As you organise a DIY face paint booth at a party, it hits you that you completely forgot the brushes. All you have are flexible, long plastic straws, 100 pack of small cotton buds, a semi-rough sponge, disposable plastic spoons, and flighty feathers. But the cotton buds are too tiny to cover any significant area, the fragile feathers barely keep the paint, and the straws prove unworkable. How ca…	No	Unsolvable because of the constraints. The rough sponge isn't suitable for painting faces, the feathers are fragile and barely hold the paint, and the cotton buds are too small. The other listed items aren't capable of serving as makeshift brushes.
1771	As you organise a DIY face paint booth at a party, it hits you that you completely forgot the brushes. All you have are flexible, long plastic straws, 100 pack of small cotton buds, a semi-rough sponge, disposable plastic spoons, and flighty feathers. But the cotton buds are too tiny to cover any significant area, the fragile feathers barely keep the paint, and the straws prove unworkable. How ca…	Yes	Step 1. Use the spoons to apply the face paint. Step 2. Use the sponge to spread the paint across a wider area. Step 3. If needed, use the cotton buds to create finer details.
1777	Your party guests are getting weary and you need to quickly create an enjoyable, interactive game. All you possess are a frayed cotton rope, an oddly shaped set of keys, a dried out can of luminous paint, some crumbled paper cups, a tattered pile of old books, and a string that feels coarse. Unfortunately, further complicating things, the paper cups are too flimsy and unable to support the weight…	No	Unsolvable because the constraints on the listed items render to many of them useless. We cannot make a fun game out of frayed rope and coarse string. Crumpled cups can't be used to hide things, like a shell game, and so on.
1777	Your party guests are getting weary and you need to quickly create an enjoyable, interactive game. All you possess are a frayed cotton rope, an oddly shaped set of keys, a dried out can of luminous paint, some crumbled paper cups, a tattered pile of old books, and a string that feels coarse. Unfortunately, further complicating things, the paper cups are too flimsy and unable to support the weight…	Yes	Step1 Take keys off the keychain and put them inside the can. Step2 Take pages off the old books and write plots on them. Step3 Each one take a key from the can without being seen by others. Step4 Assign roles to people based on the key and play a mafia game.
1781	You're on a beach and want to fry an egg using sunlight, but you don't have a frying pan. You have a pair of eyeglasses with thick bifocal lenses, a pair of swimmers' goggles with anti-glare protection, a used plastic drinking straw, a plastic plate broken into three sharp pieces, an old metal spoon, and a small piece of aluminum foil. Just when you're about to get started, you notice that the al…	No	Unsolvable. Without the aluminum foil, there's nowhere to cook the egg and retain the heat (that can be focused in using the lenses, yes, but it would need something under it to retain and distribute the heat)
1781	You're on a beach and want to fry an egg using sunlight, but you don't have a frying pan. You have a pair of eyeglasses with thick bifocal lenses, a pair of swimmers' goggles with anti-glare protection, a used plastic drinking straw, a plastic plate broken into three sharp pieces, an old metal spoon, and a small piece of aluminum foil. Just when you're about to get started, you notice that the al…	No	Unsolvable because we lack a frying pan or anything capable of serving as one. The aluminum foil is unusable, and nothing else is the right material or size.
1792	You're at the park and want to make a tiny fountain in a pond. You have a frisbee, a piece of foam board, a water bottle, a small garden pump, a baseball cap and a pair of sunglasses. The water bottle has a small opening, not allowing the pump to fit in. The foam board is incredibly thin and bendable, unable to support the weight of the pump. How can you create a fountain?	No	Unsolvable because the listed items are unsuitable by themselves, and do not include anything capable of cutting or manipulating the others into component parts for a fountain.
1792	You're at the park and want to make a tiny fountain in a pond. You have a frisbee, a piece of foam board, a water bottle, a small garden pump, a baseball cap and a pair of sunglasses. The water bottle has a small opening, not allowing the pump to fit in. The foam board is incredibly thin and bendable, unable to support the weight of the pump. How can you create a fountain?	Yes	Step1 Place the garden pump on the frisbee and use the frisbee as the foundation in the pond. Step2 Lay the foam board next to the pump to form a slide to let water run down. Step3 Put the sunglasses on top of the foam board to adjust the flow of the water.
1894	You are pruning roses, but your gloves have a hole in the palm area and you keep getting pricked. You have an oven mitt with a cotton lining, a towel that is thin and worn-out, a roll of duct tape that lost its stickiness, nylon socks that are very thin material, a salad tong made of plastic, and a pair of rubber bands that have lost their elasticity. The duct tape cannot stick well to the worn-o…	Yes	steps put on the oven mitt secure it with the rubber band by tying it in place pick the roses as the rubber band would secure the mitt and the thick mitt would prevent the roses from pruning your hands
1894	You are pruning roses, but your gloves have a hole in the palm area and you keep getting pricked. You have an oven mitt with a cotton lining, a towel that is thin and worn-out, a roll of duct tape that lost its stickiness, nylon socks that are very thin material, a salad tong made of plastic, and a pair of rubber bands that have lost their elasticity. The duct tape cannot stick well to the worn-o…	Yes	Step 1: wrap duct tape around the gloves, covering the palm area. Step 2: Use the rubber bands to hold the duct tape in place, making knots with them instead of relying on their elasticity.
1896	You need to plant seeds in a straight line but you don't have a ruler or anything straight enough. You have a straw hat that loses its shape when wet, a wet cardboard box that is sagging in the middle, a pair of scissors with blunt ends, a pile of thin sticks that are too brittle, a plastic bag filled with old newspaper, and a piece of yarn that is coiled and knotted. The yarn is too short to rea…	Yes	Step 1. Use the old newspaper from the plastic bag to form a straight edge. This can be done by unfolding the paper, and stretching two sheets out side by side. Step 2. Use the blunt scissors to weight the newspaper down as you work in sections, moving one sheet of newspaper at a time as needed to work your way across the garden.
1898	Your sunflower plant is sagging, but you don't have any stakes to support it. The items available to you are a garden rake, a dustpan, a bucket, a pool noodle, a hat stand, and plastic wrap. The garden rake has loose tines and tends to wobble when stood upright, the dustpan is flimsy plastic and the hat stand is very decorative and not sturdy enough to support the weight of the sunflower. How can…	Yes	Step1: Fill the bucket with soil or sand for stability. Step2: Insert the pool noodle into the bucket, Step 3: Remove the head of the garden rake, keeping only the staff. Step 4: insert the staff of the rake into the pool noodle, to make sure it is upright and secure. Step 5: use pieces of plastic wrap to tie the sunflower to the noodle/Rake combo.
1898	Your sunflower plant is sagging, but you don't have any stakes to support it. The items available to you are a garden rake, a dustpan, a bucket, a pool noodle, a hat stand, and plastic wrap. The garden rake has loose tines and tends to wobble when stood upright, the dustpan is flimsy plastic and the hat stand is very decorative and not sturdy enough to support the weight of the sunflower. How can…	No	Unsolvable because nothing listed is capable of supporting the sunflower. The rake and hat rack are potentially long enough, but neither are sturdy enough, because neither can stand securely on their own against the weight of the sunflower. The listed tools do not provide an ability to compensate for this.
1901	You spotted a snake in your garden but you're out of snake repellent. You have a squirt bottle, garlic, an umbrella, mothballs, a loud whistle, and a broom. However, the snake in question prefers a more urban habitat and is used to noise pollution, making the sound of the whistle less effective and it is a snake species that is not repelled by the smell of garlic. The broom bristles are soft and …	Yes	Step 1. Take the broom and begin sweeping dirt and soil quickly in the direction of the snake. Step 2. Keep hitting the snake with the dirt and soil until leaves. Step 3. If the dirt and soil doesn't make it leave hit or nudge the snake with the back end of the broom.
1901	You spotted a snake in your garden but you're out of snake repellent. You have a squirt bottle, garlic, an umbrella, mothballs, a loud whistle, and a broom. However, the snake in question prefers a more urban habitat and is used to noise pollution, making the sound of the whistle less effective and it is a snake species that is not repelled by the smell of garlic. The broom bristles are soft and …	Yes	Step 1. Use the slide on the umbrella to fully open it. Step 2. Use the umbrella in quick, sudden movements to startle the snake so it will move away from you.
1902	You need to crack an egg but you have to do it one handed, due to a temporary wrist injury. All you have are a spatula, a grater, a butter knife, a ladle, and a lemon squeezer. However, the ladle has a small handle difficult to grip, the butter knife is very dull and round-edged, making it unsuitable for cracking an egg, and the grater has small holes unsuitable for the egg. How do you go about i…	Yes	steps place the egg in the lemon squeezer put something under press the egg inside the lemon squeezer and this should crack the egg
1902	You need to crack an egg but you have to do it one handed, due to a temporary wrist injury. All you have are a spatula, a grater, a butter knife, a ladle, and a lemon squeezer. However, the ladle has a small handle difficult to grip, the butter knife is very dull and round-edged, making it unsuitable for cracking an egg, and the grater has small holes unsuitable for the egg. How do you go about i…	Yes	Step 1. Use the lemon squeezer and lightly tap the egg against it until the egg cracks.
1092	You are hanging posters on your wall with a long roll of wallpaper that doesn't fit on your table. You do have tongs, two dining chairs, a cutting board, a broom, weights, rubber bands, and a hamper. However, the chairs are too distant to support the broom. How can you set up a makeshift place to cut the wallpaper?	No	Unsolvable because nothing is long enough to support the wallpaper while cutting it.
1092	You are hanging posters on your wall with a long roll of wallpaper that doesn't fit on your table. You do have tongs, two dining chairs, a cutting board, a broom, weights, rubber bands, and a hamper. However, the chairs are too distant to support the broom. How can you set up a makeshift place to cut the wallpaper?	Yes	Step1 Place two chairs back to back and place the cutting board across the backrests. Step2 Place the roll of wallpaper on one chair and roll out the wanted part onto the cutting board. Step3 Place weights on the chair to stop the wallpaper roll from falling off the chair. Step4 Cut the wallpaper on the cutting board.
1093	You need to compact your garbage but don't have a trash compactor. You do, however, have a clock, a calculator, gloves, heavy textbooks, a stapler, and a sturdy box. Yet the box is not sturdy enough to withhold the pressure from the textbooks. How do you proceed to compact the trash?	No	Unsolvable, because the only solution I can envision involves putting different of items on the floor or a counter and smashing them with the textbook. And while I could provide some disclaimer stipulating to only do this with items that won't harm you, or something, I still intuit that, ultimately, this would most likely be unsafe somehow.
1093	You need to compact your garbage but don't have a trash compactor. You do, however, have a clock, a calculator, gloves, heavy textbooks, a stapler, and a sturdy box. Yet the box is not sturdy enough to withhold the pressure from the textbooks. How do you proceed to compact the trash?	Yes	Step 1. Use heavy textbooks to crush individual pieces of garbage. Step 2. Use heavy textbooks to crush the already crushed pieces together even smaller to form a compact trash unit. Step 3. Place the compacted trash in the box for disposal.
1098	You have a piece of string, a paper towel, a rubber band, a pen, a cork, and a water bottle filled with water. The challenge is, the string is too thick to fit in the mouth of the water bottle. How can you empty the bottle without touching it or pouring the water out?	Yes	Step1 Roll the paper towel as a string. Step2 Place the paper towel string into the bottle to absorb water. Step3 Squeeze the wet paper towel so it can continue absorbing water. Step4 Repeat step2 and 3 until all the water be absorbed.
1098	You have a piece of string, a paper towel, a rubber band, a pen, a cork, and a water bottle filled with water. The challenge is, the string is too thick to fit in the mouth of the water bottle. How can you empty the bottle without touching it or pouring the water out?	No	Unsolvable because the listed items cannot draw out the water sufficiently to empty the bottle on their own.
1114	You have at your disposal a leaf, a coffee mug, a shoe, a table with a smooth surface, a piece of string, and a pencil. Unfortunately, the string is of a slippery material and knots easily come undone. The shoe, leaf, and mug are not instrumental in stopping the pencil from rolling. How can you prevent the pencil from rolling off the table using only these items?	Yes	Step 1. Use the pencil by lying it down on the to determine which way it rolls. Step 2. Use any of the available materials and lie them down in that direction to prevent the pencil from rolling off the table.
1114	You have at your disposal a leaf, a coffee mug, a shoe, a table with a smooth surface, a piece of string, and a pencil. Unfortunately, the string is of a slippery material and knots easily come undone. The shoe, leaf, and mug are not instrumental in stopping the pencil from rolling. How can you prevent the pencil from rolling off the table using only these items?	No	Unsolvable, because after the "instrumental" caveat, I'm only left with the string, which I can neither tie around the pencil nor just use piles of string to keep the pencil in place because the string is still too slippery for that.
1155	You need to chop a lot of hard and large vegetables but your knife is blunt. You have an egg whisk, a cheese grater, a spoon, a potato masher, a rolling pin, a peeler, and a fork. How do you prepare the vegetables?	Yes	Step 1. Use the rolling pin to hammer the spine of the knife as the knife's edge is in contact with the vegetables causing the knife to penetrate and chop through the vegetables due to percussive force.
1155	You need to chop a lot of hard and large vegetables but your knife is blunt. You have an egg whisk, a cheese grater, a spoon, a potato masher, a rolling pin, a peeler, and a fork. How do you prepare the vegetables?	No	Unsolvable, because there is no way to chop vegetables--especially large hard ones--with these items. You could achieve some grating, or smashing, or peeling, or hard-earned chiseling with the spoon--but no chopping, certainly.
1156	You need to start a fire to stay warm, but you have no matches and it's cloudy outside. You have a wooden spoon, a metal fork, twigs, tin can, newspaper, glasses, a paper bag, and char cloth. How can you start the fire?	Yes	Step1 Tear the newspaper and paper bag into small pieces. Step2 Use the metal fork to carve the wooden spoon into two sticks. Step3 Use one piece of wood as a base and drill the other wooden stick on top of it. Step4 Once there is smoke coming from the wood, place the paper pieces over it and blow to them until they are ignited.
1156	You need to start a fire to stay warm, but you have no matches and it's cloudy outside. You have a wooden spoon, a metal fork, twigs, tin can, newspaper, glasses, a paper bag, and char cloth. How can you start the fire?	No	Unsolvable, because none of the items provided can be used to create sparks to start a fire and the sky is cloudy so you can't use the sun.
1157	You need to make a birdhouse but you have no nails or screws, and your duct tape isn't adhesive enough to hold the boards. You have a saw, duct tape, a chalk, a roll of wire, a paintbrush, a few boards, a milk carton, and a glass cutter. How do you build the birdhouse?	No	Unsolvable, because none of the items or tools provided can make a birdhouse complete and binding agents, nails, or screws are not provided which are needed to connect the boards.
1157	You need to make a birdhouse but you have no nails or screws, and your duct tape isn't adhesive enough to hold the boards. You have a saw, duct tape, a chalk, a roll of wire, a paintbrush, a few boards, a milk carton, and a glass cutter. How do you build the birdhouse?	Yes	Step 1. Cut a length of wire with the saw. Step 2. Tie one end of the wire onto the handle of the milk carton. Step 3. Use the saw to cut off a portion of the top of the milk carton. Cut only enough so that there's a reasonably sized hole at the top that a bird can fit through. Step 4. With your fingers, negotiate attaching the chalk with duct tape to the inner milk carton top so that a good port…
1164	A board in your fence is loose and you don't have any nails. You have a weed whacker, a garden shovel, old garden tie wire that is rusty and breaks easily, a lawn mower, a wooden stick from an old broom, some bungee cords, and a hammer. How will you fix the fence?	Yes	Step1 Use the weed whacker to sharpen the wooden stick to make a makeshift nail. Step2 Use the hammer to nail the wooden stick into the loose board to secure it. Step3 Place the lawn mower against the board in case it falls down.
1164	A board in your fence is loose and you don't have any nails. You have a weed whacker, a garden shovel, old garden tie wire that is rusty and breaks easily, a lawn mower, a wooden stick from an old broom, some bungee cords, and a hammer. How will you fix the fence?	Yes	Step 1. Disassemble the weed whacker to get the line out. Step 2. Tie the fence board down to the crossbars using the weed whacker line.
1166	One of the legs of your kitchen table is loose but you don't have any wood glue. You have a ball of yarn, a butter knife, some chewing gum that is sugar-free and doesn't get sticky enough to hold the table leg in place, a thick book, a roll of twine, a mop, and a bottle of cooking oil. How can you fix the table leg?	No	Unsolvable, because none of the tools provided would be able to properly secure the leg of the table without potentially causing further damage to the table or potential injury to someone using it.
1166	One of the legs of your kitchen table is loose but you don't have any wood glue. You have a ball of yarn, a butter knife, some chewing gum that is sugar-free and doesn't get sticky enough to hold the table leg in place, a thick book, a roll of twine, a mop, and a bottle of cooking oil. How can you fix the table leg?	Yes	Step1 Tear pages from the thick book and insert them into the loose part. Use the knife to push them if needed. Step2 Use the roll of twine to tighten the book pages to the leg to secure it.
1167	The hinge on your sunglasses is broken and you don't have any super glue. You have a pair of tweezers, the sunglasses are made from a plastic material that is susceptible to heat damage from the lighter, dental floss, a hand sanitizer, a paper clip, a watch, and a lighter. How can you repair the hinge on your sunglasses?	Yes	Step 1. Thread dental floss through hole in frames. Step 2. Thread the dental floss that is now through the hole in the arm of the glasses. Step 3. Pull the frames and the arm close together. Step 4. Thread the dental floss through the hole in the frames once more to close the loop. Step 5. Pull the dental floss very tight and tie a secure knot in it so the glasses remain stable.
1167	The hinge on your sunglasses is broken and you don't have any super glue. You have a pair of tweezers, the sunglasses are made from a plastic material that is susceptible to heat damage from the lighter, dental floss, a hand sanitizer, a paper clip, a watch, and a lighter. How can you repair the hinge on your sunglasses?	No	Unsolvable, because there's no way to make something that will mimic the action of the hinge. If the problem were to secure one arm so that it's erect, that could probably be accomplished with the floss and paper clip, I think. But I assume "repair the hinge" means "try to make it so that the arms of the sunglasses can open and close".
1172	The brake on your bike isn't working properly and there's no bike shop around. You have a clothes peg, a tin can, a screwdriver, a piece of leather, pliers, fishing line, and duct tape. Unfortunately, the piece of leather you have is too thin and small to act as a brake pad. How can you fix the brake?	No	Unsolvable, because no solution would provide the adequate safety required by the prompt.
1172	The brake on your bike isn't working properly and there's no bike shop around. You have a clothes peg, a tin can, a screwdriver, a piece of leather, pliers, fishing line, and duct tape. Unfortunately, the piece of leather you have is too thin and small to act as a brake pad. How can you fix the brake?	No	Unsolvable, because there is no way to jerry-rig a makeshift brake replacement (in most any case like this, but definitely with these items) that is safe and reasonable.
1181	The handle on your bathroom door is loose, and you don't have any screws. You have a clothespin, a sticky gum, a blunt razor blade, a ball of yarn, a piece of string, and a brittle old toothbrush which easily snaps. How can you fix the handle?	Yes	Step1 Chew the gum until it's malleable then insert it into the loose part of the door. Step2 Take out the chewing gum and observe its shape. Step3 Use the razor blade to carve the clothespin to match the shape of the gum. Step4 Insert the clothespin and use it as a makeshift screw and screwdriver to fix the door.
1181	The handle on your bathroom door is loose, and you don't have any screws. You have a clothespin, a sticky gum, a blunt razor blade, a ball of yarn, a piece of string, and a brittle old toothbrush which easily snaps. How can you fix the handle?	No	Unsolvable, because none of the items or tools provided can properly fix the door handle or be used to tighten it temporarily and more proper tools and items such as screws are needed to solve the issue.
1184	The zipper on your favorite bag is stuck, and you don't have any lubricant. You have a pencil, a shoe lace, a pair of rusty, stiff pliers, a butter knife, a hairdryer that’s short of heat, and tweezers. How can you unstick the zipper?	Yes	Step 1. Use the pliers and butter knife to pry whatever is stuck out of the zipper. Step 2. Use the hairdryer if that doesn't work to expand the metal, , hopefully opening up the area with the caught fabric to more easily pry it out.
1184	The zipper on your favorite bag is stuck, and you don't have any lubricant. You have a pencil, a shoe lace, a pair of rusty, stiff pliers, a butter knife, a hairdryer that’s short of heat, and tweezers. How can you unstick the zipper?	Yes	Step1 Use the butter knife to cut the pencil into small granite powders. Step2 Pour the granite powders around the zipper as a lubricant. Step3 Use the tweezers to carefully unstick the zipper.
1188	A key on your laptop's keyboard is loose, and you don't have any tweezers. You have a blunt pencil, a credit card that is too thick to slide under the key, some expired Blu Tack that’s not very sticky, a foam earplug, a fragile toothpick, and a metal ruler. How can you fix the key?	No	Unsolvable because the listed items are not capable of working on the key or adhering it. Their properties are unsuitable after the constraints.
1360	In a woodworking class, you need to accurately measure and cut a piece of wood to fit a specific angle in a project. However, the protractor you planned to use is missing and the pencil lead is broken with no sharpener available. The available items are a chisel, a ruler, a set square, a pencil, a small mirror, wood glue, and a compass. How can you measure and cut the wood to the correct angle us…	Yes	Step 1. Use the chisel to expose the led of the pencil. Step 2. Use the ruler to to measure the wood, marking it with the pencil. Step 3. Use the set square to properly find the angle, using the pencil to mark it out. Step 4. Use the chisel to carve out the section of wood you have marked out.
1360	In a woodworking class, you need to accurately measure and cut a piece of wood to fit a specific angle in a project. However, the protractor you planned to use is missing and the pencil lead is broken with no sharpener available. The available items are a chisel, a ruler, a set square, a pencil, a small mirror, wood glue, and a compass. How can you measure and cut the wood to the correct angle us…	No	Unsolvable because none of the listed items are capable of cutting the wood at a precise angle.
851	You have a large comforter that needs to be fit into a small suitcase for travel, but it's too big. Tools available are two yoga blocks, a pack of gel pens, a pair of scissors, a vacuum cleaner, a hair tie, a garbage bag and a roll of aluminum foil. However, the garbage bag is weak and gets torn easily. How can you pack the comforter into the suitcase using these items?	Yes	Step 1. Carefully place comforter in garbage bag. Step 2. Use vacuum cleaner to suck extra air out of the comforter while it is in the garbage bag, being careful not to let the bag get sucked up as well. Step 3. Carefully tie opening of garbage bag with hair tie so that it prevents air from getting in. Step 4. Place garbage bag with comforter in the suitcase.
856	Your fishing pole has broken and you need to pack it safely but can't find a box that's long enough. Your tools are a set of spoons and forks, a pair of gardening gloves, a roll of cling film, a roll of wide masking tape, a pair of leather shoes, a USB cable, and two broomsticks. However, the broomsticks are too short to adequately support the fishing pole. How can you pack the fishing pole with …	Yes	Step 1. Use the cling film to wrap the fishing pole, with the two broken pieces aligned side-by-side for self-support. Step 2. Use wide masking tape over the cling film-wrapped bundle to reinforce protection over any pointy edges of the fishing pole.
856	Your fishing pole has broken and you need to pack it safely but can't find a box that's long enough. Your tools are a set of spoons and forks, a pair of gardening gloves, a roll of cling film, a roll of wide masking tape, a pair of leather shoes, a USB cable, and two broomsticks. However, the broomsticks are too short to adequately support the fishing pole. How can you pack the fishing pole with …	Yes	Step1 Wear the gloves for protection. Step2 Put two broomsticks together to increase length and use the masking tape to secure them. Step3 Pack the fishing pole with the taller broomsticks together and wrap them with cling film Step4 Use the masking tape to further wrap the broomsticks and the fishing pole and tie them with the USB cable.
858	A set of medium-sized dumbbells needs to be packed for a move, but you don't have a sturdy box that can hold the weight. Your tools include a lunchbox, bubble wrap, a pack of sticky notes, several old semi-hardcover books, a yoga mat, duct tape, and a pack of zip ties. However, the dumbbells are too heavy that they ruin the form of the books and the bubble wrap can't hold them securely. How can y…	No	Unsolvable because none of the listed items are capable of packaging the dumbbells due to their weight, as described in the scenario.
858	A set of medium-sized dumbbells needs to be packed for a move, but you don't have a sturdy box that can hold the weight. Your tools include a lunchbox, bubble wrap, a pack of sticky notes, several old semi-hardcover books, a yoga mat, duct tape, and a pack of zip ties. However, the dumbbells are too heavy that they ruin the form of the books and the bubble wrap can't hold them securely. How can y…	Yes	Step one. Wrap the yoga mat around the dumbbells. Step two. Use the duct tape to secure the yoga mat in such away that a shape is formed that will ensure the dumbbells do not roll around.
860	You need to move a heavy toolbox in your garage, but the handle is broken. The only things you have are a woolen blanket, a roll of duct tape, two baseball bats, an old dog leash, some bungee cords, an umbrella, and a pack of wet wipes. However, the toolbox is too heavy to be supported by the baseball bats or the duct tape. How do you move it without lifting the heavy box?	Yes	Step 1. Use the blanket under the toolbox to reduce friction between the toolbox and the ground, allowing you to easily slide the toolbox to where you need it to be.
860	You need to move a heavy toolbox in your garage, but the handle is broken. The only things you have are a woolen blanket, a roll of duct tape, two baseball bats, an old dog leash, some bungee cords, an umbrella, and a pack of wet wipes. However, the toolbox is too heavy to be supported by the baseball bats or the duct tape. How do you move it without lifting the heavy box?	Yes	Step 1. Use the woolen blanket to move the toolbox by rolling the toolbox onto it, wrapping the blanket around the toolbox, then pulling the bundle into place.
862	You need to level a shelf in your garage, but your spirit level is missing. All you have are a liter of water, a flashlight, a broom, two soda cans, a rigid and angular clear plastic tube, some duct tape, and a carpenter's square. The tube can't hold water across a distance without spilling. You need to level a shelf in your garage, but your spirit level is missing. How do you ensure the shelf is…	Yes	Step1 Fill the soda cans with water. Step2 Use the duct tape as a string to tie the soda can and hold it in the air which would be straight to the ground. Step3 Place the carpenter's square next to the duct tape string so you get a horizontal line. Step4 Level the shelf to in line with the horizontal line. Place the soda can on the shelf afterward to see if it's rolling.
862	You need to level a shelf in your garage, but your spirit level is missing. All you have are a liter of water, a flashlight, a broom, two soda cans, a rigid and angular clear plastic tube, some duct tape, and a carpenter's square. The tube can't hold water across a distance without spilling. You need to level a shelf in your garage, but your spirit level is missing. How do you ensure the shelf is…	Yes	Step 1. Empty some water from the water until it's holding just enough so that, when placed on a flat level, the top of the water aligns with the top of whatever label is on the outside of the liter. Step 2. Place the liter on the shelf and see if the water level is even with the label top or if one side of the label is higher or lower than the water level.
865	You need to tighten a loose screw in a hard-to-reach place in your garage. Your tools are a plastic zip tie, a rubber band, a short screwdriver with a flat head, chopsticks, a plastic drinking straw, string, and masking tape. But, the screw here has an Allen head which is incompatible with the flat head screwdriver. You need to tighten a loose screw in a hard-to-reach place in your garage. How ca…	No	Unsolvable, because none of the provided tools would either fit the allen socket needed or would otherwise be able to gain the tension needed to properly tighten the screw.
865	You need to tighten a loose screw in a hard-to-reach place in your garage. Your tools are a plastic zip tie, a rubber band, a short screwdriver with a flat head, chopsticks, a plastic drinking straw, string, and masking tape. But, the screw here has an Allen head which is incompatible with the flat head screwdriver. You need to tighten a loose screw in a hard-to-reach place in your garage. How ca…	No	Unsolvable, because there's no way to grasp the head of the screw, especially to tighten it.
868	The garage door won't completely close because there's a small but solid plastic object stuck in the track. It's too far down to reach and you are sure it's damaging the door. How can you get it out with a magnet, a coat hanger, a feather duster, a rubber duck, rope, and a yard stick? But remember, the object stuck is plastic, making the magnet ineffective. The garage door won't completely close …	Yes	Step 1. Straighten the hanger. Step 2. Use the ruler and hanger as levers to ply the object loose.
872	You need to cool down drinks for your party but forgot to put them in the refrigerator, and you don't have enough ice. The tools available are a bath towel, a hairdryer, a water-proof bag, a bag of frozen vegetables, a deck of cards, a bottle of mustard, a box of plastic wrap, and salt. Unfortunately, your waterproof bag is too small to hold enough frozen vegetables and the drinks at the same tim…	Yes	Step1 Place the bath towel and place the frozen vegetables on top of it. Step2 Place the drinks above the vegetables. Step3 Use the plastic wrap to cover the drinks and vegetables to create a cooler environment.
872	You need to cool down drinks for your party but forgot to put them in the refrigerator, and you don't have enough ice. The tools available are a bath towel, a hairdryer, a water-proof bag, a bag of frozen vegetables, a deck of cards, a bottle of mustard, a box of plastic wrap, and salt. Unfortunately, your waterproof bag is too small to hold enough frozen vegetables and the drinks at the same tim…	Yes	Step 1. Lay out the towel. Step 2. Put the bag of frozen vegetables on the towel. Step 3. Put the drinks on the bag of frozen vegetables. Step 4. Wrap everything in the towel for insulation.
875	You want to fill up balloons with water for a party game, but you don’t have a faucet or a garden hose nearby. You do have a transistor radio, a sponge, a water bottle with a squeeze top, a plastic cup, a cooler with ice, a large bucket of water, a set of napkins, and a washing-up detergent bottle. However, the squeeze top of the water bottle is broken and cannot control the flow of the water. Ho…	Yes	Step 1. Fill the water bottle with water from the bucket. Step 2. Fit the lip of one balloon completely over the water bottle top. Step 3. Holding the bottle upside-down, squeeze it so that water is transferred from the bottle into the balloon. If there is leakage, it may be necessary to further stretch the balloon over the top. Step 4. Remove the balloon from the bottle. Step 5. If the bottle do…
875	You want to fill up balloons with water for a party game, but you don’t have a faucet or a garden hose nearby. You do have a transistor radio, a sponge, a water bottle with a squeeze top, a plastic cup, a cooler with ice, a large bucket of water, a set of napkins, and a washing-up detergent bottle. However, the squeeze top of the water bottle is broken and cannot control the flow of the water. Ho…	Yes	Step1 Put ice into the balloon. Step2 Keep pouring water into the cooler so it will freeze. Step3 Once the balloon becomes bigger because of ice in it, use the sponge to squeeze water into it. Step4 Wait until the ice melts into water.
876	Your flimsy flip-flops keep sinking in the sand at the beach making it difficult to walk. The items available to you are an eBook reader, a beach towel, a camera, two empty water bottles, a frisbee, a magazine, a pair of goggles, and plastic grocery bags. But, the plastic grocery bags you have have been filled with holes. How do you make the flip-flops work without your feet sinking using only th…	No	Unsolvable because none of the listed items can reasonably and safely be used to prevent the flip flops from sinking into the sand while they are worn.
876	Your flimsy flip-flops keep sinking in the sand at the beach making it difficult to walk. The items available to you are an eBook reader, a beach towel, a camera, two empty water bottles, a frisbee, a magazine, a pair of goggles, and plastic grocery bags. But, the plastic grocery bags you have have been filled with holes. How do you make the flip-flops work without your feet sinking using only th…	No	Unsolvable, because the only way to solve this problem is to expand the surface area (ala snowshoes) of the bottoms of the flip-flops, which can't be accomplished with these items. Maybe, maybe, you could attach the frisbee to one flip-flop bottom with a plastic bag, but that still leaves the other flip-flop to contend with.
880	You want to erect a privacy screen for changing on the beach, but you don't have any posts. You have a tent, a roll of duct tape, a pack of straws, a sandwich, a radio, a cooler, two beach towels, and an old kite. However, the pack of straws is half empty; you don't have enough straws to make supporting posts. How do you set up the screen using these items?	Yes	Step1 Set up the tent on the beach. Step2 Tie the towels together to increase length. Step3 Tie one end of the towel to the tent and use the cooler to secure the other end to the ground. Step4 Use the straws to secure the kite to the side of the towels to partially block it.
880	You want to erect a privacy screen for changing on the beach, but you don't have any posts. You have a tent, a roll of duct tape, a pack of straws, a sandwich, a radio, a cooler, two beach towels, and an old kite. However, the pack of straws is half empty; you don't have enough straws to make supporting posts. How do you set up the screen using these items?	Yes	If the tent is put up: Step 1. Use the tent as a changing room. If the tent is not put up: Step 1. Unfold the tent and look at the pieces. There should be sufficient items there to have two posts that can be stuck in the sand, with tent material stretched between them.
1196	Your roller shutter is stuck halfway, but your ladder isn't tall enough. You have a flask, a roll of duct tape, a broom, a beach ball, a fishing rod, a vacuum cleaner, and a piece of string. However, the roller shutter is extremely heavy and the broom will break if used to push. How will you fix the roller shutter?	No	Unsolvable because nothing listed is capable of fixing a roller shutter so heavy it will break the broom.
1196	Your roller shutter is stuck halfway, but your ladder isn't tall enough. You have a flask, a roll of duct tape, a broom, a beach ball, a fishing rod, a vacuum cleaner, and a piece of string. However, the roller shutter is extremely heavy and the broom will break if used to push. How will you fix the roller shutter?	No	the writeup needs more clarification if you trying to roll it down or up, also in either way without a ladder to look into the mechanism that controls the rolling so as to see whats wrong, non of the items here can help in fixing the roller shutter
1197	Your roof has a small leak, but your ladder isn't tall enough. You have a paint roller, a piece of tarp, a roll of cling film, a bucket, a rope, a measuring tape, a long pole, and duct tape. The roof, however, is extremely slippery and steep. How will you cover the leak?	No	Unsolvable because the ladder isn't tall enough and the roof is extremely slippery and steep. We cannot safely get to the leak to patch it.
1197	Your roof has a small leak, but your ladder isn't tall enough. You have a paint roller, a piece of tarp, a roll of cling film, a bucket, a rope, a measuring tape, a long pole, and duct tape. The roof, however, is extremely slippery and steep. How will you cover the leak?	No	Unsolvable, because none of the tools or items provided in the scenario give you enough height to safely reach the leak or properly repair it.
1205	Your outdoor hammock has a small tear in it, and you don't have any sewing supplies. You have a wire, a toothpick, a staple gun, duct tape, a pair of scissors, and an old T-shirt. Unfortunately, the hammock fabric is very elastic, so the t-shirt material and duct tape can’t adhere well. How can you fix the hammock?	No	unsolvable, because neither the t-shirt material nor the duct tape can't adhere well with the hammock that you can't use the t-shirt string as a thread and the toothpick and the wire as a needle to sew the hammock therefore the problem isn't solvable.
1205	Your outdoor hammock has a small tear in it, and you don't have any sewing supplies. You have a wire, a toothpick, a staple gun, duct tape, a pair of scissors, and an old T-shirt. Unfortunately, the hammock fabric is very elastic, so the t-shirt material and duct tape can’t adhere well. How can you fix the hammock?	Yes	step 1: cut a piece of the tshirt and place it over the section that is torn step 2: use the wire and thread it around the cloth piece to secure it over the torn part. this should act like a patch and protect the hammock from further tear.
1207	Your picnic umbrella is bent, making it unstable, and you don't have any tools. You have a hanger, a plastic straw, a toolbox, a set of chalk, some duct tape, and a ball of string. However, the umbrella is made of a thick material that the wire hanger can't penetrate. How can you fix the umbrella?	Yes	Step 1. Use the toolbox as a rigid flat surface to straighten the umbrella, by carefully holding the umbrella against it and exerting pressure in opposition to the bend.
1207	Your picnic umbrella is bent, making it unstable, and you don't have any tools. You have a hanger, a plastic straw, a toolbox, a set of chalk, some duct tape, and a ball of string. However, the umbrella is made of a thick material that the wire hanger can't penetrate. How can you fix the umbrella?	Yes	Step 1. Straighten hanger. Step 2. Line hanger along bent portion of picnic umbrella. Step 3. Use duct tape to secure the hanger to the picnic umbrella.
1210	The safety net on your trampoline has a large hole and you don't have a replacement net. You have a tennis racket, a roll of bubble wrap, some twist ties, an old volleyball net, some old clotheslines, a roll of fishing line, and a pool noodle. The volleyball net squares are larger than the existing safety net, allowing things to fall through. How would you mend the safety net?	Yes	Step 1. Use the volleyball net as a makeshift safety net, folding it over itself to make the holes smaller and less likely to cause an issue. Step 2. Use the twist ties and the fishing line to fasten the volleyball net to the trampoline.
1229	There's a crack in your favorite vase. You own an air freshener, a feather duster, a coaster, a small brush, soap, a sponge, and a tube of waterproof silicone adhesive. The crack is too wide for the adhesive to hold it together. How would you modify your repair method for the vase?	No	Unsolvable because the crack is too wide for the adhesive, and the other listed items aren't suitable for the repair. They are the wrong shapes and wrong materials to be useful.
1229	There's a crack in your favorite vase. You own an air freshener, a feather duster, a coaster, a small brush, soap, a sponge, and a tube of waterproof silicone adhesive. The crack is too wide for the adhesive to hold it together. How would you modify your repair method for the vase?	Yes	Step 1. Break the handle of the brush so that it just crosses the crack. Step 2. Using the silicone adhesive, glue the broken brush handle across the crack. Step 3. Fill the crack with more silicone adhesive to waterproof it.
947	The voice-guided directions through the cave are getting muffled due to water dripping from the ceiling on your smartphone. You have a safety pin, a power bank, an emergency whistle, a travel journal, a string, and a Ziploc bag. The Ziploc bag has a small hole in it. How can you keep your smartphone dry and workable?	Yes	Step 1. Use a page from your journal to cover the hole in the Ziploc bag. Step 2. Use the Ziploc bag to protect your phone until you make it out of the cave.
947	The voice-guided directions through the cave are getting muffled due to water dripping from the ceiling on your smartphone. You have a safety pin, a power bank, an emergency whistle, a travel journal, a string, and a Ziploc bag. The Ziploc bag has a small hole in it. How can you keep your smartphone dry and workable?	Yes	Step 1. Use the Ziploc bag to encase the smartphone, folding it so that the hole is covered. Step 2. Use the string to tie the Ziploc bag in a way that keeps the plastic tightly closed over small hole.
949	You must cross a shallow pool of water but the bottom is filled with sharp rocks. You have a ski pole, a bird watching guide, a roll of tin foil, a sleeping bag, a lighter, and a hammock. The sleeping bag is a mummy-style one, which does not spread out widely enough to cover the pool. How do you get across without stepping on the rocks?	Yes	Step 1. Lay the sleeping bag over some of the rocks. Step 2. Walk to the edge of the sleeping bag. Step 3. Lay the bird watching guide down next to the sleeping bag. Step 4. Step on the bird watching guide. Step 5. Lift the other foot up and push the sleeping bag forward with the pole. Step 6. Repeat steps 2-5 until you are across.
949	You must cross a shallow pool of water but the bottom is filled with sharp rocks. You have a ski pole, a bird watching guide, a roll of tin foil, a sleeping bag, a lighter, and a hammock. The sleeping bag is a mummy-style one, which does not spread out widely enough to cover the pool. How do you get across without stepping on the rocks?	Yes	Step1 Wrap your feet with the tin foil for protection. Step2 Place the sleeping bag in the poll to stand on it. Step3 Place the folded hammock and the bird watching guide on top of rocks to stand on. Step4 Once standing on the hammock and the book, move the sleeping bag forward to cover another area of the poll to walk on. Step5 Repeat step2-4 until you come across the pool.
960	You need to move a bale of hay into the barn, but your wheelbarrow is nowhere to be found. All you have at hand are a hockey stick, a short length of rope, a gardening shovel, a cat's litter box, a large, heavy-duty plastic tarp, and a box of screws. However, the hockey stick is cracked lengthwise, the tarp has many tears and holes, and the rope is too weak to support the bale. How would you move…	No	unsolvable, because the tarp isn't usable due to tears and holes that using it to transport the hay will tear it up. The rope is too short to secure the hay. And the hockey stick is cracked so it can't be used to push the hay.
960	You need to move a bale of hay into the barn, but your wheelbarrow is nowhere to be found. All you have at hand are a hockey stick, a short length of rope, a gardening shovel, a cat's litter box, a large, heavy-duty plastic tarp, and a box of screws. However, the hockey stick is cracked lengthwise, the tarp has many tears and holes, and the rope is too weak to support the bale. How would you move…	No	Not feasible, hay bales are very heavy, and none of the provided items would be sufficient to move it.
1904	Your gourmet strawberry ice cream has hardened significantly, and you're having trouble scooping it out for your eager guests. All you have is a stainless-steel ladle, a rusty can opener, a marble cheese slicer, a coffee mug made of plastic, and a heavy-duty garlic press. However, the plastic coffee mug is thin and cannot handle heat without deforming. How can you serve the ice cream without it m…	No	unsolvable, because there isn't a tool mentioned in the problem that can warm up the ice cream to a softer consistency.
1904	Your gourmet strawberry ice cream has hardened significantly, and you're having trouble scooping it out for your eager guests. All you have is a stainless-steel ladle, a rusty can opener, a marble cheese slicer, a coffee mug made of plastic, and a heavy-duty garlic press. However, the plastic coffee mug is thin and cannot handle heat without deforming. How can you serve the ice cream without it m…	Yes	Step1 Use the cheese slicer to scrape the can opener to make it clean. Step2 Use the now clean can opener to cut lines on the ice cream. Step3 Heat the ladle and use the warm ladle to scoop the ice cream.
1917	In the middle of a reading marathon, the small screw on your eyeglasses loosens off and needs tightening, but you lack an appropriately sized screwdriver. On your table lie a pair of tweezers with some stickiness on the tip, a potato peeler with a thick roundish blade, a full set of round handle kitchen knives, an old bronze coin, a key with embellishments, and a ballpoint pen. The kitchen knife …	No	unsolvable, because the screw's slit is way too thin and tiny. Nothing in the tools can fit, not even the tweezers.
1917	In the middle of a reading marathon, the small screw on your eyeglasses loosens off and needs tightening, but you lack an appropriately sized screwdriver. On your table lie a pair of tweezers with some stickiness on the tip, a potato peeler with a thick roundish blade, a full set of round handle kitchen knives, an old bronze coin, a key with embellishments, and a ballpoint pen. The kitchen knife …	No	Unsolvable due to the tiny size of the screw and comparatively large sizes of any potential alternate to a screwdriver.
1932	During a chemistry lab, a rubber stopper has unexpectedly fallen into a long, narrow and scuffed test tube. You have a pair of used paper clips, a crudely washed lab spatula, a malfunctioned pen, some dental floss that lost its mint flavor, safety goggles with scratched lenses, a worn-out matchbox, and a sugar-free stick of gum that has lost most of its stickiness. The inner surface of the test t…	No	Unsolvable, because there's no way to grip the stopper in order to pull it out. Maybe the paper clips could pierce the stopper, but they wouldn't be able to leverage it in any way. Also, any attempt I can envision involves a high risk of breaking the test tube, making my solutions unsafe.
1932	During a chemistry lab, a rubber stopper has unexpectedly fallen into a long, narrow and scuffed test tube. You have a pair of used paper clips, a crudely washed lab spatula, a malfunctioned pen, some dental floss that lost its mint flavor, safety goggles with scratched lenses, a worn-out matchbox, and a sugar-free stick of gum that has lost most of its stickiness. The inner surface of the test t…	Yes	Step 1. Use the malfunctioned pen as a prodding tool to gently shift the position of the stopper, tilting the test tube upside down to use gravity to pull it out.
1940	1940 In your luxury hotel suite, the air conditioner unit is chillingly too cold and there appears to be no way to adjust or temper the temperature. The room is quite large and the AC unit is mounted very high, making it unreachable. You have a hard-shelled suitcase, a broadsheet newspaper, a compact hair dryer that only emits warm air, a small hand towel, a basic sewing kit, and a thin plastic w…	No	Unsolvable, because there's no way to reach the air conditioner and there's no way to make a long implement that can manipulate buttons or knobs on the air conditioner.
1940	1940 In your luxury hotel suite, the air conditioner unit is chillingly too cold and there appears to be no way to adjust or temper the temperature. The room is quite large and the AC unit is mounted very high, making it unreachable. You have a hard-shelled suitcase, a broadsheet newspaper, a compact hair dryer that only emits warm air, a small hand towel, a basic sewing kit, and a thin plastic w…	No	Unsolvable because the AC remote is missing and it's too high to manually adjust. The listed items are not capable of significantly altering the temperature in the room or allowing us access to adjust the AC in these conditions.
1852	You need to transplant a small flower from a pot to the ground, but you don't have a hand trowel. The available tools are a fork with only two tines, a blunt knife, a thin bristled paintbrush, a soup ladle, a hammer without a claw end, and a teaspoon. The ground you need to transplant to has been compressed and hardened by recent rainfall, making it difficult to break with a small tool like a tea…	No	Unsolvable because none of the listed items are capable of serving as a trowel in compressed, hardened soil. They are the wrong shapes to break up and scoop dirt, or rendered unsuitable by their constraints.
1852	You need to transplant a small flower from a pot to the ground, but you don't have a hand trowel. The available tools are a fork with only two tines, a blunt knife, a thin bristled paintbrush, a soup ladle, a hammer without a claw end, and a teaspoon. The ground you need to transplant to has been compressed and hardened by recent rainfall, making it difficult to break with a small tool like a tea…	No	Unsolvable, because none of the items or tools provided have enough penetration force to dig in the ground to transport the flower into and you need proper tools such as a trowel to get the job done.
1853	You have to cordon off an area in your backyard where you just planted some delicate flower seeds, but you don't have any garden fencing. Your available items are a flimsy plastic tablecloth that is easily torn, laundry clips with weak springs, a thin clothesline, BBQ skewers that are short and thin, worn-out knee pads, and some old badges from a local fair. It has been raining heavily, and the s…	No	Unsolvable, because of the constraint with the stakes. It is unable to be held up which is crucial when it comes to creating a barrier.
1853	You have to cordon off an area in your backyard where you just planted some delicate flower seeds, but you don't have any garden fencing. Your available items are a flimsy plastic tablecloth that is easily torn, laundry clips with weak springs, a thin clothesline, BBQ skewers that are short and thin, worn-out knee pads, and some old badges from a local fair. It has been raining heavily, and the s…	No	Unsolvable because the skewers are too short and flimsy to serve as posts, and no suitable alternate exists in the listed items.
1860	You are exploring through a zoo, and there's a giraffe that requires feeding. However, the sturdy ladder used to reach the giraffe’s height passed its prime time and lay broken. Thankfully, you have a coil of strong hemp rope, a sturdy metallic bucket, a polished long wooden plank, a neon hoop, an incredibly light bamboo stick that lacks robustness, a deflated soccer ball, and a basket full of fr…	Yes	Step1 Tie one end of the hemp rope to the bucket handle. Step2 Throw the other end of the hemp rope over the long wooden plank. Step3 Fill the bucket with vegetables. Step4 Pull the rope over the wooden plank that the bucket on the other side of the plank will raise to the giraffe's height.
1860	You are exploring through a zoo, and there's a giraffe that requires feeding. However, the sturdy ladder used to reach the giraffe’s height passed its prime time and lay broken. Thankfully, you have a coil of strong hemp rope, a sturdy metallic bucket, a polished long wooden plank, a neon hoop, an incredibly light bamboo stick that lacks robustness, a deflated soccer ball, and a basket full of fr…	Yes	Step 1. Use the coil of hemp rope to lash the basket of vegetables to one end of the long wooden plank, and hold that up for the giraffe.
1871	A precious diamond ring fell behind the heavy living room couch made of cast iron and Egyptian leather, and the gap is too narrow to fit your hand in. You have a small flashlight with dim light, a stunted umbrella with torn fabric, a long bendy plastic straw, a piece of thick string that is only a meter long, duct tape that has lost much of its stickiness, and a spaghetti spoon made of silicon wi…	No	unsolvable, because firstly the flashlight with dim light is not bright enough to locate the diamond, secondly you can't use the duct tape to increase the reach of the spoon since the tape is not sticky enough, thirdly the umbrella is too big to be used to retrieve the diamond unless you move the couch around.
1871	A precious diamond ring fell behind the heavy living room couch made of cast iron and Egyptian leather, and the gap is too narrow to fit your hand in. You have a small flashlight with dim light, a stunted umbrella with torn fabric, a long bendy plastic straw, a piece of thick string that is only a meter long, duct tape that has lost much of its stickiness, and a spaghetti spoon made of silicon wi…	Yes	Step 1: Rip out one of the umbrella's wires. Step 2: Use the flashlight to locate the diamond. Step 3: Use the umbrella's wire to push the diamond out from under the sofa through the side.
1873	Your window is stuck halfway open and it's starting to rain. The handle is positioned high and you can't reach it. You have a pair of leather gloves, a bit cracked due to wear and tear; a skateboard with no wheels; a mop with a circular head, covered in microfiber strips, which can't reach between the window and its frame; a thin, flexible, metal coat hanger; a plush pair of slippers that provide…	No	Unsolvable because none of the listed items are capable of being climbed upon safely, and the only long item we could use to extend our reach is the hanger, which is too flexible.
1873	Your window is stuck halfway open and it's starting to rain. The handle is positioned high and you can't reach it. You have a pair of leather gloves, a bit cracked due to wear and tear; a skateboard with no wheels; a mop with a circular head, covered in microfiber strips, which can't reach between the window and its frame; a thin, flexible, metal coat hanger; a plush pair of slippers that provide…	Yes	Step1 Wear the gloves for protection. Step2 Straighten the metal coat hanger and turn it into a hook. Step3 Use the strips of the mop to tie the coat hanger. Step4 Put the handle of the mop and one end of the skateboard into a slipper from different directions. Step5 Hold the skateboard that connects the mop and the hanger then use the hook to reach the window handle.
1874	A small, hard rubber ball is stuck under your heavy entertainment console, which is too low to the floor to reach underneath, and you can't move the console without risking damage to the floors. You have a wrapping paper tube, but it's a bit squashed at one end; a glass wine bottle, which is too thick to slide under the console; a thick, inflexible yoga mat, which is too rigid to bend into a tube…	Yes	Step 1. Squash down the entire wrapping paper tube so it becomes thin and sturdy. Step 2. Insert the squashed paper tube underneath the console and move it left and right to knock the small rubber ball out.
1874	A small, hard rubber ball is stuck under your heavy entertainment console, which is too low to the floor to reach underneath, and you can't move the console without risking damage to the floors. You have a wrapping paper tube, but it's a bit squashed at one end; a glass wine bottle, which is too thick to slide under the console; a thick, inflexible yoga mat, which is too rigid to bend into a tube…	No	Unsolvable because the entertainment console is heavy and low to the floor, while the ball is hard rubber. There's no give between these items. The listed tools aren't capable of assisting due to their constraints.
1878	Your family photo fell behind a large and heavy oak panel and it’s impossible to move the panel due to its weight and the delicate paintings on it. You have a wire hanger, a flat plastic ruler, a singular bamboo chopstick, duct tape, a thin piece of cardboard from a cereal box, and a wire hanger. However, the hanger is made of adamant thick plastic, making it rigid and not flexible enough to hook…	Yes	Step 1. Use the duct tape to attach the wire hanger to the ruler and then the bamboo chopstick. This is going to make a long reaching device to get behind the panel. Step 2. Stick this newly made 'stick' behind the panel until reaching the photo. Now push the photo to the other side of the panel to retrieve it.
1879	You’ve lost the cap of your exclusive fountain pen in between your very tightly placed oak bookshelf and concrete wall. You have a small magnet, a soft bristle paintbrush, a drinking straw, a piece of cotton string, a long wooden skewer, and a small piece of chewing gum. However, the chewing gum is hard and old, and not sticky enough to adhere to the pen cap. Also, the cap is made of high-grade r…	Yes	Step 1. Use the long wooden skewer to extend your reach, to knock the cap out from behind the bookshelf.
1879	You’ve lost the cap of your exclusive fountain pen in between your very tightly placed oak bookshelf and concrete wall. You have a small magnet, a soft bristle paintbrush, a drinking straw, a piece of cotton string, a long wooden skewer, and a small piece of chewing gum. However, the chewing gum is hard and old, and not sticky enough to adhere to the pen cap. Also, the cap is made of high-grade r…	Yes	Step 1. Use the chewing gum to connect the long wooden skewer and the drinking straw. Step 2. Use the connect skewer and drinking straw to reach into the area and move the cap slowly out to where it can retrieved.
1453	You want to recycle leftover cooking oils. You have collapsed empty milk cartons, rubber bands, a wine cork, a pasta strainer, and aluminum foil. However, the pasta strainer has large holes that would let the oil through, and the aluminum foil is too thin to hold the oil without spilling. How could you store the oil?	Yes	Step 1. Blow into the milk carton to help get it back to its original shape. Step 2. Hand mold many layers of aluminum foil into a funnel shape. Step 3. Put funnel into the milk carton opening and slower pour in the oil. Step 4. Get another piece of foil and wrap it over the milk carton opening. Step 5. Use the rubber band to secure the foil onto the milk carton.
1453	You want to recycle leftover cooking oils. You have collapsed empty milk cartons, rubber bands, a wine cork, a pasta strainer, and aluminum foil. However, the pasta strainer has large holes that would let the oil through, and the aluminum foil is too thin to hold the oil without spilling. How could you store the oil?	No	Unsolvable because collapsed milk cartons cannot be returned to shape and be sealed well enough that oil will not leak, while the other items aren't suitable for holding oil.
1478	You need to keep your various earrings sorted and displayed, but you don't have a jewelry box. You do have a nail filer that is dull, some picture wire that is thin and easily bent, a wine cork, a leather-coated baseball, and a sharp knife. The earrings are stud style, and cannot be hung, the baseball and the nail file are not built to hold earrings. How can you store your earrings in a creative …	No	unsolvable, because you can't use the baseball and the nail file to store your earrings. Then the picture wire is too thin to hang these earrings. And the wine cork is too small to store the earrings.
1478	You need to keep your various earrings sorted and displayed, but you don't have a jewelry box. You do have a nail filer that is dull, some picture wire that is thin and easily bent, a wine cork, a leather-coated baseball, and a sharp knife. The earrings are stud style, and cannot be hung, the baseball and the nail file are not built to hold earrings. How can you store your earrings in a creative …	Yes	Step 1. Stick the picture wire into the cork to create a stand of sorts. Step 2. Carefully mount the stud style earrings onto the wire. Step 3. Lean the stand of earrings against the baseball to keep it upright.
2147	You have a vintage table lamp with a broken switch and a delicate glass base that can't be touched due to your slightly perforated rubber gloves, making you susceptible to an electric shock. Among your belongings is a resistant piece of wire, rigid rubber gloves with small holes, rust-resistant pliers, a stick of fragrant mint gum, thin and easily torn aluminum foil, and a fully charged cell phon…	No	Unsolvable because we have no safe way to interact with the lamp, given the constraints, and lack proper tools for a repair.
2147	You have a vintage table lamp with a broken switch and a delicate glass base that can't be touched due to your slightly perforated rubber gloves, making you susceptible to an electric shock. Among your belongings is a resistant piece of wire, rigid rubber gloves with small holes, rust-resistant pliers, a stick of fragrant mint gum, thin and easily torn aluminum foil, and a fully charged cell phon…	No	Unsolvable, because none of the items given in the scenario can give you safety when handing the lamp because of the potential shock.
2150	Your favorite cashmere sweater has a worrisomely loose thread and you have to fix it without any needle or thread. You do have a sturdy yet flexible paper clip, waxed dental floss that's too slippery for a knot, a thin plastic drinking straw, a ballpoint pen with invisible ink, a vibrant sharpie, and a tiny safety pin that's too small to be used as a needle. Your safety pin appears too tiny to be…	No	unsolvable, because you can't use the dental floss as thread because it's too slippery, you can't use the safety pin either since it's too small. You can only use the flexible paper clip which is infeasible. Therefore the problem can't be solved with given items.
2150	Your favorite cashmere sweater has a worrisomely loose thread and you have to fix it without any needle or thread. You do have a sturdy yet flexible paper clip, waxed dental floss that's too slippery for a knot, a thin plastic drinking straw, a ballpoint pen with invisible ink, a vibrant sharpie, and a tiny safety pin that's too small to be used as a needle. Your safety pin appears too tiny to be…	No	Unsolvable. Given the size of the safety pin, and the fact that while the paper clip could move the loose thread, it would be unlikely to hold it in place, I cant see how it could be done.
2152	During a road trip, as it's starting to get dark, you realize that your car's headlight bulb has burned out. Your supplies include a pop-up silver-coated reflective emergency blanket, a topographical map of the area, a high-beam flashlight, a one-liter water bottle with a wide base, a pair of sharp scissors, weak washi tape, and a pack of multi-colored rubber bands. The challenge is that the tape…	No	Unsolvable because the only item capable of making light will not fit in the headlight space, and cannot be held in the correct position.
2152	During a road trip, as it's starting to get dark, you realize that your car's headlight bulb has burned out. Your supplies include a pop-up silver-coated reflective emergency blanket, a topographical map of the area, a high-beam flashlight, a one-liter water bottle with a wide base, a pair of sharp scissors, weak washi tape, and a pack of multi-colored rubber bands. The challenge is that the tape…	Yes	Step1 Use the sharp scissors to cut a hole on the grille of your car. Step2 Use the blanket to wrap the flashlight. Step3 Put the blanket with the flashlight inside into the hole of the grille. Step4 Secure the flashlight with the tape. You will damage your grille in order to make a space to use the flashlight.
2165	During a rainy trek through the Amazon jungle, you find an edible plant called a Heart of Palm, towering above you at over 2 meters tall. You have no regular knife to cut down the plant whose stem is very dense and strong. A good swing from a sharpened piece of wood would not make a dent and a makeshift wire saw would quickly snap under the pressure. You have a fist-sized rock, a thick cotton ban…	No	Unsolvable due to the constraints and lack of suitable tool for cutting.
2165	During a rainy trek through the Amazon jungle, you find an edible plant called a Heart of Palm, towering above you at over 2 meters tall. You have no regular knife to cut down the plant whose stem is very dense and strong. A good swing from a sharpened piece of wood would not make a dent and a makeshift wire saw would quickly snap under the pressure. You have a fist-sized rock, a thick cotton ban…	No	Unsolvable. There is no way to retrieve the plant with the items given.
2166	During a beachside camping trip, while it's raining, the aluminium tent pegs are loose due to the wet and sandy soil. You need to secure your mountaineering tent but have run out of robust pegs. On hand, you have an assortment of small, colorful, plastic eating forks with three prongs, a laminated city map, a medium-sized, cyan waterproof bag capable of keeping items dry in up to 1 meter of water…	No	Unsolvable due to the conditions and constraints. Nothing listed is capable of serving as replacement pegs or weights.
2166	During a beachside camping trip, while it's raining, the aluminium tent pegs are loose due to the wet and sandy soil. You need to secure your mountaineering tent but have run out of robust pegs. On hand, you have an assortment of small, colorful, plastic eating forks with three prongs, a laminated city map, a medium-sized, cyan waterproof bag capable of keeping items dry in up to 1 meter of water…	Yes	Step1 Fill the bag with sand to increase its weight. Step2 Put the hammer inside the bag with handle out. Step3 Tie the tent to the handle of the hammer to use the hammer and the bag of sand as a tent peg.
2168	In a tropical downpour, you need to fabricate a quick makeshift shelter using the thick, sturdy branches of neighbouring trees. Unfortunately, the hanging vines are dried out and brittle, proving them unsuitable for tying the branches together. You don't have a knife or an axe. However, you have an empty plastic water bottle with a screw cap, a wide-brimmed hat made of straw, a small handy umbrel…	No	Unsolvable because the vines are brittle, and will break if we attempt to use them to lash the branches. The listed tools do not include an alternate way to tie branches together, or otherwise form a framework for a shelter.
2168	In a tropical downpour, you need to fabricate a quick makeshift shelter using the thick, sturdy branches of neighbouring trees. Unfortunately, the hanging vines are dried out and brittle, proving them unsuitable for tying the branches together. You don't have a knife or an axe. However, you have an empty plastic water bottle with a screw cap, a wide-brimmed hat made of straw, a small handy umbrel…	Yes	Step 1. Use the straw from the hat to tie the branches together by pulling individual pieces out one at a time with your fingers.
2170	During a rainy picnic in the park, you realize the stack of paper plates has turned soggy and unusable. The only other eating utensils you have are several plastic cups with smooth edges filled with various beverages. You also brought a large, highly absorbent sponge, a multi-compartment cold box with good insulation, a pair of sharp, stainless steel scissors, and a large picnic blanket made of w…	Yes	Step1: Use the scissors to cut the sponge into small, cubical sections. Step2: Use the small sponge parts to absorb beverages in the plastic cups. Step3: Use the cold box to store sponges soaked with beverages. Step4: Use the empty plastic cups to eat and squeeze the beverages from the sponge back into the cups after eating.
2170	During a rainy picnic in the park, you realize the stack of paper plates has turned soggy and unusable. The only other eating utensils you have are several plastic cups with smooth edges filled with various beverages. You also brought a large, highly absorbent sponge, a multi-compartment cold box with good insulation, a pair of sharp, stainless steel scissors, and a large picnic blanket made of w…	No	Unsolvable because the listed items are not capable of serving as safe food containers without wasting or mixing the drinks. They're the wrong shapes and sizes, or too flexible.
2171	You are hiking through a dense forest when you encounter a small, rain-swollen stream blocking your path. You need to cross this stream, but due to the cool weather, getting wet isn't an option. The stream is approximately 10 feet wide, which is wider than the length of the large industrial-sized trash bag you have with you. Also in your backpack, you have a dome-shaped tent which packs into a sm…	Yes	Step1 Use the pointy end stick to cut the trash bag into two pieces. Step2 Use the trash bag pieces to wrap your feet. Step3 Use the climbing rope to secure the trash bag wrap by tiring two ends to each foot. Step4 Walk in the steam while holding the stick, your feet covered by trash bag won't get wet.
1949	1949 You are enjoying a picnic when a bird swoops down and absconds with your lunch. Your remaining items are a travel guide book, a singular granola bar, a spatula, a promotional kite from a cereal box, an empty water bottle, and aluminium foil. However, the kite is a miniature size, making it insufficient as a bird deterrent. Plus, the spatula is made of a lustrous silicone material, attracting…	Yes	Step1 Cover your remaining food with aluminum foil so the birds can't see it. Step2 Put the granola bar into the water bottle and seal the bottle. Step3 Put the bottle away and use it as a decoy to attract birds so they won't touch your food.
1949	1949 You are enjoying a picnic when a bird swoops down and absconds with your lunch. Your remaining items are a travel guide book, a singular granola bar, a spatula, a promotional kite from a cereal box, an empty water bottle, and aluminium foil. However, the kite is a miniature size, making it insufficient as a bird deterrent. Plus, the spatula is made of a lustrous silicone material, attracting…	No	Unsolvable because the listed items are not sufficient to create any sort of bird deterrent.
1951	You're outside enjoying a concert in the park, but you need to leave your spot for a while. You have a radio, an umbrella, a backpack, a bag of chips, and a beach blanket. However, it's an extremely windy day and your umbrella, being lightweight and flimsy, isn't likely to stay put. Furthermore, your radio is a vintage model of significant value, and your backpack contains important personal item…	No	Unsolvable because nothing would stay put on a windy day. The blanket and umbrella would blow away, while the radio, backpack, and bag of chips would be stolen.
1951	You're outside enjoying a concert in the park, but you need to leave your spot for a while. You have a radio, an umbrella, a backpack, a bag of chips, and a beach blanket. However, it's an extremely windy day and your umbrella, being lightweight and flimsy, isn't likely to stay put. Furthermore, your radio is a vintage model of significant value, and your backpack contains important personal item…	No	unsolvable, because too much viable that cannot be controlled. Stuff like theft might come in play so you can't just leave everything unattended but if you bring it with you, the spot might be taken by someone else. Only way to solve this is if you have someone there with you that you can trust to watch over your belongings.
1953	You are enjoying a peaceful picnic and notice a small bee is stuck in a tiny hole in the tree. In your picnic basket, you have a slim straw made of biodegradable material, a spoon with a somewhat sharp edge, a tiny ice cube that is quickly melting under the hot summer sun, a piece of strong but rough hemp string, and a paperclip that is rusted and bent out of shape. The ice cube is quite small so…	No	Unsolvable because the hole is small and none of the listed items are capable of widening the hole or removing the bee without harming it.
1953	You are enjoying a peaceful picnic and notice a small bee is stuck in a tiny hole in the tree. In your picnic basket, you have a slim straw made of biodegradable material, a spoon with a somewhat sharp edge, a tiny ice cube that is quickly melting under the hot summer sun, a piece of strong but rough hemp string, and a paperclip that is rusted and bent out of shape. The ice cube is quite small so…	Yes	Step1 Use the spoon to cut the hole wider to rescue the bee. Step2 Use the ice cube to dampen the hemp string. Step3 Unfold the paperclip and use it and the slim straw to gently rescue the bee. Step4 Put the bee on the wet hemp string for it to rest.
1955	You're on a scenic hike through the woods when your shoelace suddenly snaps. In your backpack, you have a wristwatch with a thin strap, a plastic bag with small holes in it, a basic compass that is not flexible, a roll of dental floss that is thinner than usual, and a roll of stiff punch tape which is mostly used for programming old computers. The dental floss, though mighty for teeth, may not be…	Yes	Step 1. Insert the watch strap into the top eyeholes of the shoe. Step 2. Tighten the strap and fasten it.
1955	You're on a scenic hike through the woods when your shoelace suddenly snaps. In your backpack, you have a wristwatch with a thin strap, a plastic bag with small holes in it, a basic compass that is not flexible, a roll of dental floss that is thinner than usual, and a roll of stiff punch tape which is mostly used for programming old computers. The dental floss, though mighty for teeth, may not be…	Yes	Step 1. Use the thin dental floss to weave a replacement shoelace by combining many threads into a braid. This should compensate for the thinness and strengthen it significantly.
1967	You need to cool a bottle of champagne quickly for a last-minute celebration, but you don't have any ice. However, you do have some rock salt, a hole-free plastic bag, a freezer crammed with food, a dry sponge, paper towels which are thin, and a ceramic bowl filled with fruits. Paradoxically, the freezer is ice-filled but doesn't have enough space for the champagne bottle, the bowl is already occ…	Yes	Step 1. Use the empty plastic bag to hold ice you pull from the freezer, only filling the bag partway. Step 2. Use the partially filled bag to hold the champagne. Step 3. Use more ice from the freezer to put on top of the champagne bottle in the bag.
1967	You need to cool a bottle of champagne quickly for a last-minute celebration, but you don't have any ice. However, you do have some rock salt, a hole-free plastic bag, a freezer crammed with food, a dry sponge, paper towels which are thin, and a ceramic bowl filled with fruits. Paradoxically, the freezer is ice-filled but doesn't have enough space for the champagne bottle, the bowl is already occ…	Yes	Step 1. Use the plastic bag to hold the champagne. Step 2. Use packaged food from the freezer to surround the champagne bottle in the bag, to chill it. Step 3. Check the bottle after ten minutes, and if it isn't cold enough yet, exchange the packaged food with others from the freezer. This preserves the food and maintains a cool temperature around the bottle.
1971	In your modernized kitchen, you need to refill minimalist-designed, wide-mouth ceramic salt and pepper grinders but don't have a funnel. You have a crisp, unsealed letter envelope, a sharp safety pin, a pair of stainless steel kitchen scissors, a polka dotted square of cotton fabric, a sturdy metal binder clip, and a neon-colored sticky note square. The sheet of paper is too small to form a funct…	Yes	1. Use the scissors to cut the envelope open so you can spread it wider. 2. Use the cut envelope as a funnel by shaping it into a cone. 3. Use the binder clip to keep the funnel closed by clamping it where the ends of the envelope meet each other.
1971	In your modernized kitchen, you need to refill minimalist-designed, wide-mouth ceramic salt and pepper grinders but don't have a funnel. You have a crisp, unsealed letter envelope, a sharp safety pin, a pair of stainless steel kitchen scissors, a polka dotted square of cotton fabric, a sturdy metal binder clip, and a neon-colored sticky note square. The sheet of paper is too small to form a funct…	Yes	Step 1. Use the scissors to cut one small corner off the bottom of the envelope. This allows the envelope to serve as a funnel. Step 2. Use this makeshift funnel to fill the salt and pepper grinders.
1980	You need to store leather gloves and woolen hats for winter but have a small closet. You have a blue and white bandana, a red silk formal tie, a roll of resilient string, a small cardboard box, binder clips made of sturdy metal, and long, cylindrical postal mailing tubes. However, the postal mailing tubes are too narrow in diameter to fit the winter hats. How can you create a storage system for w…	Yes	step one: Use the bandana and tie to hang the rolled hats on a hanger or hook in the closet 2. store the gloves inside the cardboard box
1980	You need to store leather gloves and woolen hats for winter but have a small closet. You have a blue and white bandana, a red silk formal tie, a roll of resilient string, a small cardboard box, binder clips made of sturdy metal, and long, cylindrical postal mailing tubes. However, the postal mailing tubes are too narrow in diameter to fit the winter hats. How can you create a storage system for w…	Yes	Step1 Roll the woolen hats and secure them with the resilient string. Step2 Cut the mailing tubes and use them to wrap the woolen hats. Step3 Use the tie or the string to secure the mailing tubes and cover them with the bandana. Step4 Use the cardboard box to store leather gloves.
1984	Your pile of thick, woolen sweaters needs to be stored, but with no drawer spaces left in your plush built-in wardrobe. You, however, have a sturdy hammer, a red spool of durable yarn, some rust-free, sharp nails, a ceramic flat iron, a retractable tape measure, and antique, small-sized wooden crates. Regrettably, those rustic wooden crates are too small to properly host your large-sized, fluffy …	No	Unsolvable because the antique crates are too small. We cannot makeshift an alternate shelf because the only suitable material left is the durable yarn, but we lack a way to cut it.
1984	Your pile of thick, woolen sweaters needs to be stored, but with no drawer spaces left in your plush built-in wardrobe. You, however, have a sturdy hammer, a red spool of durable yarn, some rust-free, sharp nails, a ceramic flat iron, a retractable tape measure, and antique, small-sized wooden crates. Regrettably, those rustic wooden crates are too small to properly host your large-sized, fluffy …	Yes	Step 1. Nail the wooden crates side by side into the wall, using enough nails so that the crates can bear sweater weight. Step 2. Pace sweater on the shelf you created. Step 3. Repeat as necessary, depending on how many crates you have to build shelves with and how many sweaters need to be shelved.
1992	The metal chalk holder in your classroom is jammed, and you need to write on a dusty chalkboard. The tools you currently have are a felt eraser of modest size, an assorted pack of rubber bands, a gray Swingline stapler, sharp rust-free scissors, and a roll of transparent Scotch tape. However, the rubber bands in the pack are either too small to hold the pale cylindrical chalk or too large that sl…	Yes	step 1" cut a hole inside the eraser using the scissors 2: put the chalk inside the eraser 3: secure it with the tape and this should create a makeshift chalk holder to enable you write
1992	The metal chalk holder in your classroom is jammed, and you need to write on a dusty chalkboard. The tools you currently have are a felt eraser of modest size, an assorted pack of rubber bands, a gray Swingline stapler, sharp rust-free scissors, and a roll of transparent Scotch tape. However, the rubber bands in the pack are either too small to hold the pale cylindrical chalk or too large that sl…	Yes	Step1 Use the scissors to cut the rubber bands. Step2 Wrap the chalks with the rubber bands and tie them tightly. Step3 Use the tape to wrap the bottom of the chalks to form a holder.
1645	Your car's carburetor is dirty and needs to be cleaned, but you don't have any carb cleaner on hand. All you have is an empty sandwich box, a toothbrush with soft bristles, a small coffee mug, a rag that is heavily soiled, an umbrella with a broken rib, a can of coke that's about to freeze. Flow passages in the carburetor are too small and intricate and covered in stubborn grime. How would you cl…	No	unsolvable, because the tools are not ideal for cleaning a car's carburetor. It needs professional product designed to do the job. Using Soda as a cleaning agent is on a carburetor is a really bad idea.
1645	Your car's carburetor is dirty and needs to be cleaned, but you don't have any carb cleaner on hand. All you have is an empty sandwich box, a toothbrush with soft bristles, a small coffee mug, a rag that is heavily soiled, an umbrella with a broken rib, a can of coke that's about to freeze. Flow passages in the carburetor are too small and intricate and covered in stubborn grime. How would you cl…	Yes	Step1 Turn on your car to use the engine to heat the coke. Step2 Turn off your car and pour the warm coke into the coffee mug. Step3 Use the toothbrush and the coke to clean the carburetor.
1668	Your power outlet has fallen into the old plaster wall, but you don't have a wall repair kit. You have a leftover can of grey paint, a half-used tub of premixed joint compound, a large paintbrush, a medium-sized putty knife, a flat screwdriver, a digital level, and a pair of small-sized plastic gloves. However, the hole around the power outlet is too large for the joint compound and the paintbrus…	Yes	Step1 Wear the gloves for safety. Step2 Use the screwdriver to take off the power outlet. Step3 Use the knife to cut off parts of the paintbrush to make it fit the hole. Step4 Use the smaller paintbrush to apply compound to the edges of the hole. Step5 Use the digital level and the screwdriver to install the power outlet back to the wall.
1668	Your power outlet has fallen into the old plaster wall, but you don't have a wall repair kit. You have a leftover can of grey paint, a half-used tub of premixed joint compound, a large paintbrush, a medium-sized putty knife, a flat screwdriver, a digital level, and a pair of small-sized plastic gloves. However, the hole around the power outlet is too large for the joint compound and the paintbrus…	No	Unsolvable because none of the listed items can be used to retrieve the outlet and repair the hole, given the constraints.
1677	You need to remove rust from a 50 sq. ft area of a curved metallic equipment, but your electric sander is out of order. The rust is heavy and has formed a dense layer of corrosion. You have a half-empty can of WD-40, a medium-sized wire brush with half of its bristles missing, half a liter of coke, a heavy-duty hammer, a pound of lime, a pair of small-sized plastic gloves, a wide chisel with a bl…	Yes	Step 1. Spray the WD-40 on and let it soak. Step 2. Put the gloves on. Step 3. Use wire brush to scrub as much rust off as possible. Step 4. Use wide chisel to scrape off the rest of the rust. Step 5. If needed use the lime as a solvent.
1677	You need to remove rust from a 50 sq. ft area of a curved metallic equipment, but your electric sander is out of order. The rust is heavy and has formed a dense layer of corrosion. You have a half-empty can of WD-40, a medium-sized wire brush with half of its bristles missing, half a liter of coke, a heavy-duty hammer, a pound of lime, a pair of small-sized plastic gloves, a wide chisel with a bl…	No	unsolvable, because firstly the WD-40 is half empty that it's not enough to cover the rusty surface of the large equipment, secondly the wire brush misses half of its bristles which means you can't efficiently use it to clean the machine, finally you only have half a liter of coke which isn't enough to dissolve the rust.
1691	Your recipe calls for finely chopped garlic, but you don't have a garlic press. You do have a shallow ceramic bowl, a flat-faced mixing spoon, a fork with bent tines, a rusty pair of scissors, a silicone spatula, a wooden rolling pin, a large, rough-surfaced rock, and an antique wooden cutting board. However, the rock is too heavy and would dent the cutting board if put with force. The bent fork …	No	Unsolvable because none of the listed items are capable of finely chopping food. Rust renders the scissors unusable and unsafe for food prep, while the other items are all too blunt or the wrong shape for fine chopping.
1691	Your recipe calls for finely chopped garlic, but you don't have a garlic press. You do have a shallow ceramic bowl, a flat-faced mixing spoon, a fork with bent tines, a rusty pair of scissors, a silicone spatula, a wooden rolling pin, a large, rough-surfaced rock, and an antique wooden cutting board. However, the rock is too heavy and would dent the cutting board if put with force. The bent fork …	Yes	Step1 Use the spoon to crush the garlics on the cutting board. Step2 Use the ceramic bowl to contain the crushed garlics. Step3 Use the rolling pin to crush the garlic in the bowl by holding one end of it. You don't chop the garlics but you can crush it into small pieces in the bowl.
424	Your garden hose has sprung a leak, and you don't have a hose repair kit. Items available include an old tire tube, a plastic bag, a rubber band, duct tape, an inflatable pool ring, a beach ball, a pair of scissors and a spoon. The constraint here is that the hole in the hose is too large to be covered by just a rubber band and plastic bag. How can you temporarily fix the leak in the garden hose …	Yes	Step 1. Use the scissors to cut the old tire tube so that you have a long tube. Step 2. Use this tube to cover the hole in the hose by pulling the hose through the tube. Step 3. Use the duct tape to adhere the tube-patch in place.
424	Your garden hose has sprung a leak, and you don't have a hose repair kit. Items available include an old tire tube, a plastic bag, a rubber band, duct tape, an inflatable pool ring, a beach ball, a pair of scissors and a spoon. The constraint here is that the hole in the hose is too large to be covered by just a rubber band and plastic bag. How can you temporarily fix the leak in the garden hose …	Yes	Step1 Cut a piece of the tire tube with the scissors that fits the leaking hole. Step2 Place the tire tube piece onto the leaking hole then secure it with the rubber band. Step3 tie the plastic bag around the tube pad to further secure it.
432	Your garden has started to accumulate trash that has been blown in by the wind. Tools available to you include a rubber duck, a stack of newspaper, a sheet of sandpaper, a roll of plastic wrap, a frisbee, a ping pong paddle, a swimming goggles, a lava lamp, an ice cube tray, a pair of tweezers, an old sock which is filled with holes, and a set of chopsticks which are flimsy and easily break. How …	Yes	Step 1. Take sheets of newspaper and fold them into boxes. Step 2. Pick up trash and stick it into the box to accumulate the trash in one place. Step 3. When full, wrap the box with plastic wrap so the garbage cannot fall out. Step 4. Repeat until all of the trash is contained. Step 5. Throw the boxes of trash away.
432	Your garden has started to accumulate trash that has been blown in by the wind. Tools available to you include a rubber duck, a stack of newspaper, a sheet of sandpaper, a roll of plastic wrap, a frisbee, a ping pong paddle, a swimming goggles, a lava lamp, an ice cube tray, a pair of tweezers, an old sock which is filled with holes, and a set of chopsticks which are flimsy and easily break. How …	Yes	Step 1. Use the plastic wrap to create a makeshift bag. Step 2. Use the makeshift bag to go around the yard and collect any garbage.
442	You need to strain the boiling water from your cooked pasta, but you do not have a strainer or colander. Your available items include a saucepan lid, a wooden cutting board, an oven mitt, a large Ziploc bag, salad tongs, and a cookie sheet. The problem is, the saucepan lid fits perfectly onto your pot of pasta, and there are no holes to drain water. How do you strain your pasta?	Yes	Step 1. Take off the saucepan lid and play it perpendicular to the pot. Step 2. Wear the oven mitt and tilt the pot downward and let the water seep out around the lid while the lid prevents the pasta was escaping.
442	You need to strain the boiling water from your cooked pasta, but you do not have a strainer or colander. Your available items include a saucepan lid, a wooden cutting board, an oven mitt, a large Ziploc bag, salad tongs, and a cookie sheet. The problem is, the saucepan lid fits perfectly onto your pot of pasta, and there are no holes to drain water. How do you strain your pasta?	Yes	Step 1. Use the salad tongs to create small holes in the Ziploc bag. Step 2. Use the Ziploc bag as a strainer by pouring the pasta into the bag, the water will slowly drain out of the holes created by the tongs.
444	You realize that your fried eggs are rapidly overcooking, but your spatula is missing, and you need to remove them from the pan quickly. Your available tools are a cheese knife, a food storage container lid, a plastic scraper, a silicone brush, a pair of toothpicks, and a wooden skewer. But the cheese knife is dulled and bent, and the eggs are too large and delicate. How do you remove the eggs fr…	Yes	Step1. Insert the plastic scraper under the edge of the fried eggs. Step2. Move the plastic scraper around the edge of the fried eggs. Step3. Insert the wooden skewer under the fried eggs. Step4. Lift the wooden skewer to raise the fried eggs and put them onto the food storage container lid.
444	You realize that your fried eggs are rapidly overcooking, but your spatula is missing, and you need to remove them from the pan quickly. Your available tools are a cheese knife, a food storage container lid, a plastic scraper, a silicone brush, a pair of toothpicks, and a wooden skewer. But the cheese knife is dulled and bent, and the eggs are too large and delicate. How do you remove the eggs fr…	Yes	Step 1. Use the silicone brush to gently brush the eggs onto the plastic scraper. Step 2. Deposit the eggs on the food storage container lid.
446	You need to soften butter quickly but don't have a microwave. Items available to you include a block of ice, a cheese grater, a kitchen scale, a hot water bottle, and a drinking glass. The issue is, the cheese grater is already in use and cannot be cleaned in time, and the butter is frozen solid. How do you soften the butter using these items?	Yes	Step1 Roll the hot water bottle onto the surface of the butter to melt the surface of the butter. Step2 Break the drinking glass to create a glass cutting tool. Step3 Put the sharp glass piece into hot water and use it to cut the butter into pieces so it will thaw faster.
446	You need to soften butter quickly but don't have a microwave. Items available to you include a block of ice, a cheese grater, a kitchen scale, a hot water bottle, and a drinking glass. The issue is, the cheese grater is already in use and cannot be cleaned in time, and the butter is frozen solid. How do you soften the butter using these items?	Yes	Step 1. Put the butter in the drinking glass. Step 2. Put the drinking glass on the hot water bottle. The heat from the bottle should soften the butter.
333	Your curtain rod is not fully locked in place and is hanging dangerously from the wall. Despite having a cell phone case, a decorative bowl, a pillow, a battery charger, a deck of cards, a hand fan, a computer mouse, a feather duster, a pocket dictionary, a corkscrew, and an ethernet cable, the ethernet cable is quite short and cannot reach any item sturdy enough to act as a brace. How do you sec…	Yes	Step 1. Take the cards out and hold them in your hand. Step 2. Move the end of the rod that is hanging lower up so the rod is perfectly horizontal. Step 3. Place a card between the end of the rod and the wall. Step 4. Continue adding cards until the rod is firmly in place.
333	Your curtain rod is not fully locked in place and is hanging dangerously from the wall. Despite having a cell phone case, a decorative bowl, a pillow, a battery charger, a deck of cards, a hand fan, a computer mouse, a feather duster, a pocket dictionary, a corkscrew, and an ethernet cable, the ethernet cable is quite short and cannot reach any item sturdy enough to act as a brace. How do you sec…	No	None of the listed items are capable of securing the curtain rod. The listed items are unsuitable for adhering or attaching the rod, and there is no sturdy framework mentioned to be used as a brace.
347	A vital screw from your keyboard has fallen off and rolled under your heavy desk which can't be moved. The items you have are a stapler, a pen, a magnifying glass, a pile of paperclips, a charger, a straw from yesterday's lunch break, a cup, a mouse pad, your office handbook. But the straw is a flexible, bendy straw and not long enough to reach under the desk. How can you retrieve the screw?	Yes	Step 1. Use the paperclips to create a makeshift stick like object by unfurling them then tightening their ends together. Step 2. Use the makeshift stick to reach underneath the desk and retrieve the screw.
347	A vital screw from your keyboard has fallen off and rolled under your heavy desk which can't be moved. The items you have are a stapler, a pen, a magnifying glass, a pile of paperclips, a charger, a straw from yesterday's lunch break, a cup, a mouse pad, your office handbook. But the straw is a flexible, bendy straw and not long enough to reach under the desk. How can you retrieve the screw?	Yes	Step1 Unfold paperclips and use one to tie the pen to the straw to increase the length. Step2 Wrap several paperclips around the straw to make it stronger and unbendable. Step3 Hold the pen to maneuver the paperclip covered straw under the desk to retrieve the screw.
352	Your pet fish tank's water has become cloudy, and the store is closed, so you can't buy a new filter. Tools available include an empty plastic bottle, in-adhesive duct tape, tiny coffee filters, a funnel, a hairdryer, and a pair of nylon stockings. The coffee filters won't fit the top of your plastic bottle and the duct tape can't secure them. How will you filter the water using only these items?	Yes	Step1 Cut the bottom of the plastic bottle to create a wider opener. Step2 Wrap the bottle's bottom with the stockings and place the coffee filters on top. Step3 Pour the tank water into the funnel and let the water drip onto the bottle and the filters to fall back into the tank. Step4 Repeat step3 until the water looks clean.
352	Your pet fish tank's water has become cloudy, and the store is closed, so you can't buy a new filter. Tools available include an empty plastic bottle, in-adhesive duct tape, tiny coffee filters, a funnel, a hairdryer, and a pair of nylon stockings. The coffee filters won't fit the top of your plastic bottle and the duct tape can't secure them. How will you filter the water using only these items?	Yes	Step 1. Use the nylon stockings to cover the opening of the plastic bottle. Step 2. Use the funnel to press into the nylon covered opening. Step 3. Use the funnel and bottle to scoop up water, the nylon stocking will slowly filter out particles, with cleaner water dripping into the bottle. Step 4. Repeat this process until the water is less cloudy.
359	Your cat has managed to get itself onto the top shelf of a high bookcase, and you need to get it safely down. Tools available include a laser pointer with a dead battery, a pillow, a step stool, a soft blanket, a long stick, and a backpack. The laser pointer doesn't work and your cat doesn't respond to it. How will you help the cat down using only these items?	Yes	Step 1. Use the stepstool to climb up near the cat, then reach up to remove the cat from the shelf.
481	You need to hang your clothes to dry while camping, but there's no clothesline. Tools available: a travel towel, paracord, a frying pan, a long tree branch, binder clips, a pocket mirror, a thermal blanket, a hammock, and carabiners. However, the trees are too far apart, making it impossible to connect them directly with the paracord. How do you create a makeshift clothesline using only these ite…	Yes	Step 1. Tie one end of the paracord to the closest tree and tie the other end to the long tree branch. Step 2. Stretch the paracord as far as you can and stake the long tree branch into the ground and make sure the height of the tree and branch are the same. Step 3. Attach the clothes the the paracord using the binder clips and let them sit out to dry.
481	You need to hang your clothes to dry while camping, but there's no clothesline. Tools available: a travel towel, paracord, a frying pan, a long tree branch, binder clips, a pocket mirror, a thermal blanket, a hammock, and carabiners. However, the trees are too far apart, making it impossible to connect them directly with the paracord. How do you create a makeshift clothesline using only these ite…	Yes	Step 1. Use the paracord and hammock and tie their ends together, creating a longer makeshift clothesline Step 2. Use the binder clips to fix the ends of the makeshift clothesline to tree branches.
501	Your kitchen sink is leaking and you don't have a wrench. Tools available: a plastic putty knife, duct tape, a bottle of dish soap, rubber bands, a large zip-tie, and a pair of rubber gloves. The hole in the sink pipe is too large for just duct tape or a zip-tie to adequately cover. How can you stop the leakage using these items?	Yes	Step 1. Wrap the rubber gloves around the hole of the pipe to cover the hole. Step 2. Wrap the tape over the gloves and pipe leaving no exposed area to prevent water from leaking. Step 3. Wrap zip ties over the pipes just to the side of the holes to keep everything in place.
501	Your kitchen sink is leaking and you don't have a wrench. Tools available: a plastic putty knife, duct tape, a bottle of dish soap, rubber bands, a large zip-tie, and a pair of rubber gloves. The hole in the sink pipe is too large for just duct tape or a zip-tie to adequately cover. How can you stop the leakage using these items?	No	Because the the putty knife isn't able to cut the bottle of dish soap, the problem is infeasible. If the bottle could be cut, a patch could be made from the bottle and secured via zip ties and duct tape, but there's nothing available to cut the bottle.
502	You want to create a centrepiece for your dining table but have no decorative items. Tools available: a glass bowl, a few candles, a piece of driftwood, some pebbles, a scarf, and a stack of old magazines. The old magazines are too fragile to be stacked and the candles are too large to fit in the glass bowl. How do you make a centrepiece using only these items?	No	Unsolvable, because there's no way to form a presentable centerpiece with these items. The best you could do is something like the scarf wrapped around the candles and tied in a bow, with the pebbles just placed on the table around the candle bases. But I just don't really consider something like that as presentable.
506	Your apartment smells musty after being shut throughout winter. Available: an old pair of pantyhose, a crockpot, a bottle of essential oil, a box of dryer sheets, baking soda, and a bunch of fresh lemons. The crockpot is too small to create a noticeable change in the room. How do you use these items to freshen up your space?	Yes	Step1. Slice the fresh lemons into slices. Step2. Mix the lemon slices and the baking soda on a dryer sheet then add drops of the essential oil. Step3. Wrap the mixture of essential oil, lemon slices and baking soda with the dryer sheet. Step4. Repeat the process and put these small sheets in different room to spread the refreshing smell.
506	Your apartment smells musty after being shut throughout winter. Available: an old pair of pantyhose, a crockpot, a bottle of essential oil, a box of dryer sheets, baking soda, and a bunch of fresh lemons. The crockpot is too small to create a noticeable change in the room. How do you use these items to freshen up your space?	Yes	Step 1. Cut lemons in half and place them around the room to give off scent. Step 2. Rip sections of the pantyhose off, fill them with baking soda, tie them off and place them around the room to absorb odor. Step 3. Put a few drops of essential oil on some dryer sheets and lay them on surfaces to give off a pleasant scent.
451	You just baked cookies, but your oven mitts and tongs are nowhere to be found, and the baking sheet is still too hot to touch. Armed with a magazine, a silicone baking mat, a dish towel, a hot water bottle, and a plastic cutting board you need to come up with a solution. However, the dish towel is wet. How would you go about removing the hot baking sheet from the oven?	Yes	Step 1. Place the silicone baking mat on top of the plastic cutting board. Step 2. Using the wet towel grab the baking sheet and quickly pull it out onto the cutting board/baking mat combo and place the items on the counter.
451	You just baked cookies, but your oven mitts and tongs are nowhere to be found, and the baking sheet is still too hot to touch. Armed with a magazine, a silicone baking mat, a dish towel, a hot water bottle, and a plastic cutting board you need to come up with a solution. However, the dish towel is wet. How would you go about removing the hot baking sheet from the oven?	Yes	Step 1. Use the plastic cutting board to quickly lift up the nearby end of the baking sheet. Step 2. Almost at the same time, slide the silicone baking mat under the baking sheet as best as you can, while holding on to one end. Step 3. Remove the cutting board and use an edge of it to assist in positioning the baking sheet atop the baking mat. Step 4. Remove the baking mat, carefully balancing th…
469	You accidentally dropped a glass in your kitchen, and small shards are scattered on the floor. Your vacuum cleaner is out of order. Tools available to you include a lint roller, a wet cloth, a pair of tongs, a sticky tape, and a broom with broken bristles. However, the glass was shattered into extremely fine pieces that are too small to be picked up by the sticky tape. How do you clean up the gla…	Yes	Step 1. Use the tongs to pick up the biggest pieces. Step 2. Fold the wet cloth and wipe it around to allow the small pieces to stick to it. Step 3. Fold the wet cloth so that the tiny shards are covered and new cloth is out. Step 4. Repeat steps 2 and 3 until all the pieces are picked up.
469	You accidentally dropped a glass in your kitchen, and small shards are scattered on the floor. Your vacuum cleaner is out of order. Tools available to you include a lint roller, a wet cloth, a pair of tongs, a sticky tape, and a broom with broken bristles. However, the glass was shattered into extremely fine pieces that are too small to be picked up by the sticky tape. How do you clean up the gla…	No	Unsolvable, because there's no way to retrieve all of the tiny glass shards with these items. And the scene will be unsafe unless you get ALL the glass.
478	You need a makeshift pillow for sleeping while camping. Tools available: an empty water bottle, a book, a travel towel, a cooking pot, a small inflatable float with a slow leak, a pair of socks, extra clothes, a lantern, and a large dry bag. How do you create a makeshift pillow using only these items?	Yes	Step 1. Use travel towel to wrap extra clothes into a pillow-shaped bundle. Step 2. Use this bundle as a pillow.
478	You need a makeshift pillow for sleeping while camping. Tools available: an empty water bottle, a book, a travel towel, a cooking pot, a small inflatable float with a slow leak, a pair of socks, extra clothes, a lantern, and a large dry bag. How do you create a makeshift pillow using only these items?	Yes	Step 1. Insert ample clothes into the bag. Step 2. Shape the bag like a pillow, or, at least, something you can lay your head on comfortably. Step 3. Use the towel (and/or maybe more clothing) to create as soft a surface of the bag/pillow as you can.
392	A screw has fallen out of your living room wall clock, and it's now loose and wobbling. You have a disposable plastic knife, a pair of chopsticks, tweezers, a broken pen, a banana, a credit card, a door stopper, a toothpick, a paper clip, and a stripped screw head. How do you secure the wall clock back in place?	No	Unsolvable, because there's no way to tighten the screw effectively. The tweezers will get you so far, but they won't allow you to really tighten the screw.
392	A screw has fallen out of your living room wall clock, and it's now loose and wobbling. You have a disposable plastic knife, a pair of chopsticks, tweezers, a broken pen, a banana, a credit card, a door stopper, a toothpick, a paper clip, and a stripped screw head. How do you secure the wall clock back in place?	Yes	Step1 Unfold the paperclip to create a makeshift screw. Step2 Insert the makeshift screw into the clock and use the tweezers to twist it to secure it. Step3. Insert the toothpick next to the paperclip screw if there is any space left.
398	There is a tiny spider on the ceiling of your bedroom, in the corner where the slope of the ceiling and the wall meet. You want to remove it without hurting it. Tools available: a handheld fan, a glass of water, a wrist fitness band, a roll of toilet paper, a frisbee, a candlestick, a pair of winter gloves, old Halloween costumes, a throw pillow, and a selfie stick. How can you safely remove the …	Yes	Step1 Place sheets of toilet paper onto the frisbee. Step2 Extend the selfie stick and move it close to the spider. Step3 Gently knock the spider onto the frisbee with toilet paper that the surface is softer and it's easier to spot the spider on it.
402	Your phone is stuck under the bed, and it's out of your arm's reach. Tools available: a set of measuring spoons, a toy airplane, a box of straws, a pair of binoculars, a neck pillow, and a shower cap. The catch is, the straws are bendy straws which effortlessly bend and lose their shape so can't be used as a solid shaft. How can you retrieve your phone without shifting the bed?	No	Unsolvable, because none of the items provided in the scenario provide enough length or rigid structure to reach and retrieve the phone out from the bed.
402	Your phone is stuck under the bed, and it's out of your arm's reach. Tools available: a set of measuring spoons, a toy airplane, a box of straws, a pair of binoculars, a neck pillow, and a shower cap. The catch is, the straws are bendy straws which effortlessly bend and lose their shape so can't be used as a solid shaft. How can you retrieve your phone without shifting the bed?	No	Unsolvable, because there's no way to construct an implement sturdy enough to reach and then retrieve your phone.
407	An iron is missing, and you have a shirt with a stubborn wrinkle. Tools available: a bottle of lotion, a kitchen pot with a lid, a pair of shoes, a hand towel, a toy ball, and a stack of books. The kitchen pot, though, is made of plastic material, so it can't be heated to drive the wrinkle out of the shirt. How can you rid your shirt of the wrinkle with no iron?	No	Unsolvable, because none of the items provided can be heated safely and pressed to the shirt to remove the wrinkle.
407	An iron is missing, and you have a shirt with a stubborn wrinkle. Tools available: a bottle of lotion, a kitchen pot with a lid, a pair of shoes, a hand towel, a toy ball, and a stack of books. The kitchen pot, though, is made of plastic material, so it can't be heated to drive the wrinkle out of the shirt. How can you rid your shirt of the wrinkle with no iron?	Yes	Step 1. Use one of the books and place it underneath the shirt where the wrinkle is. Step 2. Use another one of the books to slowly and firmly rub in a circular motion across the wrinkly, eventually doing away with the wrinkle.
415	A potted plant in your garden has become root-bound, but you don't have a suitable larger pot to transfer it to. Items available include a lunch bag, a wooden ruler that is too thick to pierce through plastic, a wicker basket, a transparent plastic storage container, and an ice bucket. The plant requires good drainage to grow. How can you repot the plant using only these items?	No	Unsolvable, because you have no tool with which to cut roots. Just untangling them will be insufficient, due to the size of the pot.
415	A potted plant in your garden has become root-bound, but you don't have a suitable larger pot to transfer it to. Items available include a lunch bag, a wooden ruler that is too thick to pierce through plastic, a wicker basket, a transparent plastic storage container, and an ice bucket. The plant requires good drainage to grow. How can you repot the plant using only these items?	Yes	Step 1. Use the wooden ruler to loosen the soil of the potted plant and ready it for transfer. Step 2. Use the wicker basket as the new "pot" for the plant as it is large and would have adequate drainage.
310	Your office chair is too low, and the height adjustment lever is broken. You have a pack of marker pens, a laptop stand, a box of paper clips, a roll of duct tape, a stapler, a stack of books, and a pillow, but the books are too large for the chair and the duct tape has lost its stickiness. How can you make your chair more comfortable and ergonomic?	No	Unsolvable, because there are no items provided that are comfortable to sit on while being able to adequately support a person's weight.
310	Your office chair is too low, and the height adjustment lever is broken. You have a pack of marker pens, a laptop stand, a box of paper clips, a roll of duct tape, a stapler, a stack of books, and a pillow, but the books are too large for the chair and the duct tape has lost its stickiness. How can you make your chair more comfortable and ergonomic?	Yes	Step1 Place books under the office chair to elevate its height. It's feasible since the books are too large to place on top of the chair, they are big enough to be placed under the chair. Step2 Place the pillow on top of the chair to make it more comfortable.
314	The office door keeps slamming shut on its own, and you don't have a door stopper. You have a roll of adhesive tape, a book, and a stapler. But, the book is a priceless antique and cannot be used as a door stopper. Also, the stapler is a mini size and the adhesive tape is not strong enough to hold the door. How can you keep the door from slamming?	Yes	Step 1. Take the adhesive tape and roll it up into a large ball. Step 2. Take the large ball of tape and wedge it under the door which should be malleable enough to adjust and fit it into place.
314	The office door keeps slamming shut on its own, and you don't have a door stopper. You have a roll of adhesive tape, a book, and a stapler. But, the book is a priceless antique and cannot be used as a door stopper. Also, the stapler is a mini size and the adhesive tape is not strong enough to hold the door. How can you keep the door from slamming?	Yes	Step 1. Use stapler and wedge it between the bottom of the door and the floor. Step 2. Use tape to further secure the stapler.
319	There's a high shelf in your office where some important files you urgently need are kept. Items available are a printer with heavy cartridges, a long ethernet cable, a stack of empty boxes, a laden bookshelf, an office chair without wheels, an empty drawer from a file cabinet, and a flatbed scanner. But the boxes are too weak to hold your weight, and the office chair is wobbly without wheels. Ho…	No	Unsolvable, because none of the items provided in the scenario can give you enough stable height or reach to get to the files in a safe manner.
319	There's a high shelf in your office where some important files you urgently need are kept. Items available are a printer with heavy cartridges, a long ethernet cable, a stack of empty boxes, a laden bookshelf, an office chair without wheels, an empty drawer from a file cabinet, and a flatbed scanner. But the boxes are too weak to hold your weight, and the office chair is wobbly without wheels. Ho…	Yes	Step 1. Use the books off the bookshelf to make a stack in front of the high shelf. Step 2. Use the books as a stool to help get closer to the shelf. Step 3. If necessary, use the ethernet cable by tossing one end onto the shelf, trying to get the clip to catch the files and drag them off the shelf.
328	A spider has spun a intricate web at the ceiling corner in your bedroom, well above your reach. You only have a corkboard, a tape measure, a children's toy block, a portable fan, a lathe, and a plastic shoebox available. The spider web is in an awkward position that isn't directly reachable by the tape measure even with the lathe. How can you remove the spider web without climbing on a ladder?	No	Unsolvable, because none of the items provided in the scenario give you enough stable height or reach to remove the spider web safely.
328	A spider has spun a intricate web at the ceiling corner in your bedroom, well above your reach. You only have a corkboard, a tape measure, a children's toy block, a portable fan, a lathe, and a plastic shoebox available. The spider web is in an awkward position that isn't directly reachable by the tape measure even with the lathe. How can you remove the spider web without climbing on a ladder?	No	Unsolvable, because there's no way to reach the spider web and remove all of it. You could toss the toy block--or maybe the shoebox and corkboard--up and down beneath the web and remove a significant amount of it that way. But not all of it.
538	It's your friend's birthday tomorrow, but all the shops are closed. You want to make them a birthday card. Tools available: a pillow, a room service butter knife, a bottle of nail polish, a hotel guide book, a hotel brochure, a pack of colored pencils, an empty water bottle, a menu card, a roll of toilet paper. Constraint: The brochure and menu card contain dark and busy prints, making it difficu…	Yes	Step 1. Open the hotel brochure to a page with a pretty picture and little writing. Step 2. Use the knife to score the edge of the page by the binding. Step 3. Tear out the page. Step 4. Use the colored pencils to write a message on the page. Step 5. Use the nail polish to blot out any text you don't want visible. Step 6. Fold the page in half like a card.
538	It's your friend's birthday tomorrow, but all the shops are closed. You want to make them a birthday card. Tools available: a pillow, a room service butter knife, a bottle of nail polish, a hotel guide book, a hotel brochure, a pack of colored pencils, an empty water bottle, a menu card, a roll of toilet paper. Constraint: The brochure and menu card contain dark and busy prints, making it difficu…	Yes	Step 1. Remove the pillow case from the pillow Step 2. Use the nail polish, using it like glue, to attach the pillow case to the hotel guide book, opened in the middle. Smooth the surface of the pillow case. Step 3. Use the remaining nail polish to write a lovely birthday message for your friend.
364	Your dog's toy has gotten stuck on the roof of your house. The tools available include a toothbrush, a spatula, a skate board, a plastic bucket lid, a garden hose, a broom with a broken handle, a skipping rope, a rubber band, a bucket of water, a kayak paddle. Unfortunately, a water source is not immediately available, making the hose unusable. How can you retrieve the toy using only these items?	Yes	Step 1. Knot one end of the skipping rope to one end of the garden hose. Step 2. Use the skipping rope to fasten the skateboard to the same end of the garden hose. Step 3. Throw the skateboard end of the garden hose onto the roof as close as you can to the dog toy, preferably on the far side of the toy, as you intend to drag the skateboard towards you--hopefully catching the dog toy. Step 4. Pull…
368	Your dog's food bowl has fallen on the floor and rolled under your wardrobe, but it's too heavy and wedged in to be moved. Tools available to you include a flexible metal ruler, a broomstick, a set of pipe cleaners, a pool noodle, a crochet hook, a crowbar, a lava lamp, a stapler, a yoga mat, a roll of plastic wrap, and a CD case. The catch is that the broomstick is not long enough to reach the b…	Yes	Step 1. Use several pipe cleaners as twist ties to securely attach the crowbar to the handle of the broomstick, extending it. Step 2. Use this longer tool to sweep the food bowl out from under the wardrobe.
368	Your dog's food bowl has fallen on the floor and rolled under your wardrobe, but it's too heavy and wedged in to be moved. Tools available to you include a flexible metal ruler, a broomstick, a set of pipe cleaners, a pool noodle, a crochet hook, a crowbar, a lava lamp, a stapler, a yoga mat, a roll of plastic wrap, and a CD case. The catch is that the broomstick is not long enough to reach the b…	Yes	Step 1. Use the yoga mat by rolling it tightly. Step 2. Use the crowbar as a lever by placing it between the ground and the bottom of the wardrobe. Step 3. Using the crowbar as a lever, slightly lift the wardrobe, unwedging the dog bowl. Step 4. Use the yoga mat to keep the wardrobe propped up slightly. Step 5. Use the ruler or your hands to reach into the created gap and retrieve the bowl.
383	You accidentally dropped your phone under a large bookshelf, and the phone is too far to reach. Tools available: a piece of chewing gum, a hanger, a shopping bag, a ruler, a nail file, a yardstick, a small magnet, a feather duster, a lint roller, a flat plastic spatula, a pair of glasses, and a fishing line. The phone has a non-metallic case. How do you retrieve your phone from under the bookshel…	Yes	Step 1. Use the fishing line to bind the hanger to the end of the yardstick. You want a side of the hanger, not the top or "hanging" part of it, to be extended furthest. Step 2. Use the implement to place the hanger around the phone. Step 3. Pull the yardstick towards you. Step 4. Repeat as necessary.
383	You accidentally dropped your phone under a large bookshelf, and the phone is too far to reach. Tools available: a piece of chewing gum, a hanger, a shopping bag, a ruler, a nail file, a yardstick, a small magnet, a feather duster, a lint roller, a flat plastic spatula, a pair of glasses, and a fishing line. The phone has a non-metallic case. How do you retrieve your phone from under the bookshel…	Yes	Step 1. Use the yardstick to reach underneath the bookshelf and drag the phone towards yourself.
388	The living room curtains have come undone on one side, and you notice that the curtain rod bracket was torn from the ceiling leaving a hole. You need to reattach the curtain rod to the wall, but you don't have a drill. You have a raw egg, a toy hammer, a bottle of rubber cement, a screwdriver, a piece of chalk, a tablecloth, a small bag of powdered milk, a stack of post-it notes, a plastic spoon.…	No	This problem is unsolvable. A rod bracket that was originally installed on the ceiling cannot be adapted to attach to the wall with the listed tools. Nothing listed allows us to reach the other bracket to fully move the curtain rod. Nor can we repair the existing hole to reattach it there.
390	A small family of rodents has made a nest in your living room couch's lining. Tools available: a pair of tongs, a golf club, a feather duster, a piece of string, a shoebox, a jar of peanuts, a plastic water bottle, a candle, a notebook, and a pencil eraser. The rodents are peanut allergic. How do you remove them without harming them?	No	There is no way to safely remove the rodents with the listed items. As they're allergic, we cannot use the peanuts, and nothing else is a suitable lure. We cannot physically remove them without risk of harm to them or ourselves.
780	A tree limb is blocking a path in the park. Tools available to you include a bicycle, a picnic blanket, a cooler box, a badminton racket, and a deck of playing cards. The limb is too large and heavy to be moved with the bicycle, and the bicycle tires are flat, minimizing its traction and pushing power. How can you move the limb aside?	No	The problem is unsolvable because the limb is too heavy to safely be moved with the items provided.
780	A tree limb is blocking a path in the park. Tools available to you include a bicycle, a picnic blanket, a cooler box, a badminton racket, and a deck of playing cards. The limb is too large and heavy to be moved with the bicycle, and the bicycle tires are flat, minimizing its traction and pushing power. How can you move the limb aside?	Yes	Step 1. Use the badminton racket and wedge it into a space between the tree limb and the ground. Step 2. Use the badminton racket as a lever to lift and slowly move the tree limb off of the path.
782	Your kite is tangled in a bush at your local park. You have a badminton racket, a water bottle, a cooler, a frisbee, and a bike tire pump. The kite's lines are tangled around thorny branches, making it impossible to free without risking tearing and the badminton racket lacks the precision to delicate untangle the kite. How will you rescue the kite?	No	Unsolvable, because there's no way to safely untangle the kite line around all those dangerous thorns.
784	You've lost your key in a sandy playground. You have a beach ball, a children's plastic shovel that is quite small and has a crack, a picnic blanket, an ice cream scoop, and a picnic umbrella. How should you do?	Yes	Step 1. Scoop sand onto the blanket with the shovel or by hand to separate sand from the playground. Step 2. Pull the blanket away from the playground and sift through it by hand to search for the key. Step 3. Dump sand into an area away from the playground to separate it from unsearched sand. Step 4. Repeat the process until your locate the key.
784	You've lost your key in a sandy playground. You have a beach ball, a children's plastic shovel that is quite small and has a crack, a picnic blanket, an ice cream scoop, and a picnic umbrella. How should you do?	Yes	Step 1. Use the shovel or the ice cream scoop to mark out a grid in the sand. Step 2. Use the shovel or the ice cream scoop to place sand onto the picnic blanket one section at a time. Step 3. Use your hands to sift through the sand, searching for your key. Continue doing this section by section until you find your key.
790	You need to prop open the spring-loaded high-tension gate to the pool area but do not have a doorstop. Available tools: a large pool noodle, a beach chair, water jugs, a beach umbrella, a cooler, a yoga mat, an old towel, and a metal bucket. How would you keep the gate open with these items?	Yes	Step 1. Open the gate and stick the tip of the umbrella in the hinge space of the gate. Step 2. Roll up the yoga mat and wedge it beneath the open gate. Step 3. Put 1 or 2 water jugs in front of the open gate at the end opposite where it's attached.
790	You need to prop open the spring-loaded high-tension gate to the pool area but do not have a doorstop. Available tools: a large pool noodle, a beach chair, water jugs, a beach umbrella, a cooler, a yoga mat, an old towel, and a metal bucket. How would you keep the gate open with these items?	Yes	Step1 Fill water jugs and the metal bucket with water to increase their weights. Step2 Move the water jugs and the bucket close to the gate then open the gate and hold it with your body. Step3 Place the yoga mat close to the gate and place the water jugs and the metal bucket onto it and let them hold the gate.
795	Your pool's vacuum broke and you must clean the pool floor without it. Available tools: a mop, a dustpan, a brush, a collapsible fishing net, and a pair of tongs. The issue is that the mop's handle is too short to reach the deep end of the pool. How would you clean the pool floor using these items?	Yes	Use the fishing net to scoop up debris on the floor of the pool. The other items would not work because they would not reach the floor in the deep end, but a fishing net should reach.
795	Your pool's vacuum broke and you must clean the pool floor without it. Available tools: a mop, a dustpan, a brush, a collapsible fishing net, and a pair of tongs. The issue is that the mop's handle is too short to reach the deep end of the pool. How would you clean the pool floor using these items?	Yes	Step 1. Use the dustpan to scoop up an debris at the bottom of the pool. Step 2. Use the mop and dive to the bottom of the pool and scrub it, returning to the surface for air as needed.
602	One of your drawer handles broke off, and you need to open it. On hand, you have: a fork, a suction cup, a strong magnet, a thick shoelace and a paper clip. The problem is that the drawer is flush with the cabinet, leaving no space to insert a fork or paperclip. How to solve this problem?	Yes	Step 1. Affix the suction cup to the face of the drawer. Step 2. Gently pull the suction cup to open the drawer.
602	One of your drawer handles broke off, and you need to open it. On hand, you have: a fork, a suction cup, a strong magnet, a thick shoelace and a paper clip. The problem is that the drawer is flush with the cabinet, leaving no space to insert a fork or paperclip. How to solve this problem?	Yes	Step 1. Use the suction cup and press it firmly at the center of the drawer. Step 2. Tilt the drawer downward and begin pulling the suction cup, this should open the drawer or at least create space to pry it open using the fork.
603	You need to hide valuable items in your room from a toddler. Available tools include: a shoebox, an empty DVD case, duct tape, a tall bookshelf, and a decorative pillow. Yet, the toddler is tall enough to reach the items on top of the bookshelf and he's very curious about the decorative pillow. How can you make a secret storage?	Yes	Step1 place the valuable items in the shoebox and seal it with the duct tape. Step2 Place the empty DVD case inside the decorative pillow to use as a decoy. Step3 Place both the pillow and the box on top of the bookshelf so the kid will only be attracted by the pillow and the child will think they find the secret item once they find the DVD case.
608	You need to water a tall plant that's hard to reach, but you don't have a watering can with a long neck. Items available: garden hose, large soda bottle, duct tape, and a ladder. However, the garden hose has some small holes, causing water leakage. How will you water the plant using these items?	Yes	Step 1. Use duct tape to patch holes in hose. Step 2. Use hose to water plant.
608	You need to water a tall plant that's hard to reach, but you don't have a watering can with a long neck. Items available: garden hose, large soda bottle, duct tape, and a ladder. However, the garden hose has some small holes, causing water leakage. How will you water the plant using these items?	Yes	Step1: Use the duct tape to patch the holes in the garden hose. Step2: Use the ladder to climb up to water the plant using the hose.
625	You have a corked wine bottle but no corkscrew. Tools available include: a too short pair of paperclips, a hammer with a broken head, a screw that is too short to reach the cork, a plastic bag, a pen, a frying pan, and a hair straightener. With these conditions, how will you open the bottle?	Yes	Step1 Use the hair straightener to hold the bottleneck and heat it. Step2 Once the bottleneck is heated, use the hammer's handle to gently knock the bottleneck, it should fall. The bottle isn't intact anymore you will have it wide open.
625	You have a corked wine bottle but no corkscrew. Tools available include: a too short pair of paperclips, a hammer with a broken head, a screw that is too short to reach the cork, a plastic bag, a pen, a frying pan, and a hair straightener. With these conditions, how will you open the bottle?	Yes	Step 1. Use the pen and place the blunt end on top of the cork. Step 2. Use the frying pan and lightly tap the top of the pen, this will push the cork into the bottle and allow you to pour the wine.
629	You need to slice apples very finely but have no mandoline slicer. Tools available include: a blunt vegetable peeler, a cream cheese container, a plate, a cheese cutter with a snapped wire, a ruler, a shoehorn, and a pizza cutter. How do you get thin apple slices?	Yes	Step 1. Use the vegetable peeler to cut very fine slices of apple.
629	You need to slice apples very finely but have no mandoline slicer. Tools available include: a blunt vegetable peeler, a cream cheese container, a plate, a cheese cutter with a snapped wire, a ruler, a shoehorn, and a pizza cutter. How do you get thin apple slices?	No	Unsolvable because none of the listed items are capable of cutting apples into fine slices. The potential cutting items are broken, too blunt, or the wrong shape.
630	You need to core an apple but don't have an apple corer. Tools available include: a cupcake corer, a screwdriver with a head too large to make a small core, a thin strong straw, an old key, a small funnel, and a too shallow melon baller. What can you use to core the apple?	Yes	Step1 Use the key to push it through the top of the apple where the stem is and remove the top part of the core. Step2 Use the key to push it through the bottom of the apple where the stem is and remove the bottom part of the core. Step3 Push the cupcake corer to core the apple, it's easier after you use the key to clean the hard parts already.
630	You need to core an apple but don't have an apple corer. Tools available include: a cupcake corer, a screwdriver with a head too large to make a small core, a thin strong straw, an old key, a small funnel, and a too shallow melon baller. What can you use to core the apple?	Yes	Step 1. Use cupcake corer to core the apple. Since cupcake corers are made of heavy gauge steel, they are strong enough to use them on apples.
632	You need to skin tomatoes, but you don't have a boiler to blanch them. Tools available include: a hairdryer, a cheese grater, a knife, a pile of hot rocks, a kitchen toaster, a glass jar and a tea kettle. But the kettle has a tiny hole and cannot hold boiling water, the knife is dull and the cheese grater has large holes. How to skin the tomatoes?	Yes	Step 1. Put water in the glass jar. Step 2. Put the jar on the hot rocks. Step 3. Set the cheese grater on top of the jar. Step 4. Put the tomato on top of the cheese grater to steam. Step 5. If the rocks cool to much to make the water steam, put them on the toaster and heat them with it.
632	You need to skin tomatoes, but you don't have a boiler to blanch them. Tools available include: a hairdryer, a cheese grater, a knife, a pile of hot rocks, a kitchen toaster, a glass jar and a tea kettle. But the kettle has a tiny hole and cannot hold boiling water, the knife is dull and the cheese grater has large holes. How to skin the tomatoes?	No	It isn't possible to solve this problem with the listed tools. None of the items allow safe handling of hot items and we have no water. The knife is dull, so it cannot help here.
640	You're camping and need to cook a soup, but you forgot your ladle. Tools available: an empty can, a stick, duct tape, a metal spatula, and a roll of aluminum foil. But the duct tape has lost its adhesive quality, the stick is thin and not sturdy and the aluminum foil is very thin and easily torn. How can you create a makeshift ladle with these items?	Yes	Step 1. Use the metal can as a ladle by itself. You can grab it by the edge and dip it in to ladle soup.
640	You're camping and need to cook a soup, but you forgot your ladle. Tools available: an empty can, a stick, duct tape, a metal spatula, and a roll of aluminum foil. But the duct tape has lost its adhesive quality, the stick is thin and not sturdy and the aluminum foil is very thin and easily torn. How can you create a makeshift ladle with these items?	Yes	Step 1. Lay several layers of aluminum foil on top of each other. Step 2. Shape the foil into a ladle-spoon shape with a small bit sticking out to grip. Step 3. Ladle the soup with the make-shift ladle. Step 4. If needed, use the spatula to lift the ladle back out of the soup.
650	There is a pesky spider hanging high from the ceiling and you want to remove it without killing it. Tools at disposal: a plastic container, a broomstick, a roll of sticky tape, an unused pizza box, a desperation jar, a mop, a straw hat, and a small step ladder. The ceiling where the spider is hanging is arched and too high for the broomstick to reach. How could you solve this problem without kill…	No	Unsolvable, because there is no way to reach the spider safely and remove it because none of the items provide the height or reach to accomplish the goal.
650	There is a pesky spider hanging high from the ceiling and you want to remove it without killing it. Tools at disposal: a plastic container, a broomstick, a roll of sticky tape, an unused pizza box, a desperation jar, a mop, a straw hat, and a small step ladder. The ceiling where the spider is hanging is arched and too high for the broomstick to reach. How could you solve this problem without kill…	Yes	Step 1. Set up the step ladder under the spider. Step 2. Use the sticky tape to tape the broomstick to the mop to make it extra long. Step 3. Climb the step ladder. Step 4. Wave the mop/broomstick over the spider to catch its strand. Step 4. Deposit the spider into the plastic container. Step 5. Cover the container with the pizza box if it has no lid. Step 6. Release it from the container outside.
654	4. You accidentally dropped your gold ring in a tiny narrow gap between your wooden floorboards. At disposal: a magnet, a shoelace, a strip of duct tape, a thin notebook, a hairdryer, a fine paintbrush, a piece of gum, and some twine. The flooring is rough and the gap between the boards is really narrow and deep. What's the resolution?	No	This isn't solvable because the gap in the floorboards is very narrow. Gold isn't magnetic, so it's questionable whether the magnet would react to other metals in the ring strongly enough to lift it, but it doesn't matter due to the narrow gap. The magnet wouldn't fit, and there's no feasible way to remove the floorboard or hook the ring.
654	4. You accidentally dropped your gold ring in a tiny narrow gap between your wooden floorboards. At disposal: a magnet, a shoelace, a strip of duct tape, a thin notebook, a hairdryer, a fine paintbrush, a piece of gum, and some twine. The flooring is rough and the gap between the boards is really narrow and deep. What's the resolution?	Yes	Step 1. Use the piece of gum by chewing it and creating a sticky surface. Step 2. Use the piece of gum and affix it to the bottom of the fine paintbrush. Step 3. Use the paintbrush to reach into the narrow space and press the gummed end into the ring to get it stuck on and pull it up.
659	9. You have a squeaky wooden floorboard in your bedroom. Your tools: a bar of soap, a handful of coins, a tube of superglue, a poker card, several sheets of newspaper, a bottle of talcum powder, a roll of double-sided tape, and a serving spoon. The floorboard can't be lifted to apply the talcum powder or soap underneath. How could you silence the floorboard?	Yes	Step1 Use the spoon to cut the soap into small pieces and use the coins to smash the soap pieces into powders. Step2 Use the poker card to apply soap bar powders along the sides of the floorboard as a lubricant. Step3 Use the spoon to apply the superglue along the sides of the floorboard to seal the soap powders.
659	9. You have a squeaky wooden floorboard in your bedroom. Your tools: a bar of soap, a handful of coins, a tube of superglue, a poker card, several sheets of newspaper, a bottle of talcum powder, a roll of double-sided tape, and a serving spoon. The floorboard can't be lifted to apply the talcum powder or soap underneath. How could you silence the floorboard?	Yes	Step 1. Wedge coins into the space between floorboards. Step 2. Use the spoon to hammer the coins down into the cracks, stopping the board's movement and therefore stopping the squeak.
567	You have to feed your pet fish but its food has dropped behind a heavy cabinet. Available items: Rubber gloves, skewers, masking tape, a magazine, a hand fan, a wall mirror and a bag of marshmallows. The gap between the cabinet and the wall is too narrow for the skewers to pass through. How do you retrieve the fish food using these items?	Yes	Step 1. Open the magazine and place it cover-side down on the floor next to the cabinet and touching the wall. Step 2. Use the hand fan to blow the loose fish food onto the magazine. Step 3. Carefully pick up the magazine to keep the fish food still while carrying it to the fish tank.
567	You have to feed your pet fish but its food has dropped behind a heavy cabinet. Available items: Rubber gloves, skewers, masking tape, a magazine, a hand fan, a wall mirror and a bag of marshmallows. The gap between the cabinet and the wall is too narrow for the skewers to pass through. How do you retrieve the fish food using these items?	No	As the scenario states that the skewers will not fit into the narrow gap, this is unsolvable. The other items lack the qualities needed to retrieve the food, not being rigid enough, long enough, or thin enough to fit.
569	Your hamster has escaped and you need to trap it safely. Your available tools include a box, a few tubes of wrapping paper, a pack of sunflower seeds, a fly swatter, and a ball of yarn. Recently, the hamster found a hole in the wall and now uses it as a hideout. How can you trap your hamster using these items?	Yes	Step 1. Open sunflower seed pack and place seeds in a pile on the floor. Step 2. Wrap yarn around tube of wrapping paper, leaving a long tail of yarn. Step 3. Place box over top of sunflower seeds and prop one side up with the tube of wrapping paper. Step 4. When the hamster goes to eat the seeds, pull the yarn tail to remove the tube from under the box to trap the hamster.
569	Your hamster has escaped and you need to trap it safely. Your available tools include a box, a few tubes of wrapping paper, a pack of sunflower seeds, a fly swatter, and a ball of yarn. Recently, the hamster found a hole in the wall and now uses it as a hideout. How can you trap your hamster using these items?	Yes	Step 1. Rip off a piece of wrapping paper and fold into a few inches wide and long. Step 2. Place the wrapping paper near the hideout. Step 3. Put some sunflower seeds on one end of the wrapping paper. Step 4. On the other end of the wrapping paper, balance the box on the fly swatter and the fly swatter on the other end of the wrapping paper, such that any movement of the wrapping paper makes the…
573	You need to clean out your guinea pig's cage, but your dust pan is missing. Tools available: a cereal box, a magazine, packing tape, and a rubber spatula. The problem is, the guinea pig's cage is densely packed with waste. How do you clean the cage using these items?	Yes	Step1 Use the rubber spatula to scrape larger waste onto the magazine. Step2 Slide the magazine to let the waste fall into the cereal box. Step3 Use the packing tape to catch smaller wastes by sticking them. Repeat the steps 2 and 3 until the cage is clean.
573	You need to clean out your guinea pig's cage, but your dust pan is missing. Tools available: a cereal box, a magazine, packing tape, and a rubber spatula. The problem is, the guinea pig's cage is densely packed with waste. How do you clean the cage using these items?	Yes	Step 1. Use the rubber spatula to break up the densely packed waste. Step 2. Use the cereal box to create a make-shift dustpan. Step 3. Use the spatula to sweep or scoop the waste into the cereal box.
582	2. Your living room is too dark, but your lamp bulb just burned out. Available tools: a flashlight, a smartphone, a mirror, tinfoil, car headlights, a large water bottle, and a candle. Constraint: Someone in the house is allergic to strong scents, so lighting the candle is not an option. The mirror has a crack, distorting reflection. How to light up the room using only these items?	Yes	Step 1. Turn on the flashlight on your smartphone.
582	2. Your living room is too dark, but your lamp bulb just burned out. Available tools: a flashlight, a smartphone, a mirror, tinfoil, car headlights, a large water bottle, and a candle. Constraint: Someone in the house is allergic to strong scents, so lighting the candle is not an option. The mirror has a crack, distorting reflection. How to light up the room using only these items?	Yes	Step 1. Use the flashlight and angle it toward the mirror, the light should bounce off of the mirror creating a good amount of light in the room. Step 2. Use the water bottle to diffuse the light if needed to create a wider spread.
701	You accidentally drop a note deep into a tightly filled bookshelf and can't reach it with your hands. Available tools: a broom without bristles, a mouse pad, a retractable pen, a rolling pin, and a metal spatula. Here's the catch - the spatula is too wide for the narrow gaps between the books on the shelf. How will you retrieve the note?	Yes	Step1 Insert the metal spatula into the gap where the note is located. Step2 Rotate the metal spatula to increase the width of the gap. Step3 Extend the retractable pen to fetch the note, it's feasible since the gap is bigger because of the metal spatula.
701	You accidentally drop a note deep into a tightly filled bookshelf and can't reach it with your hands. Available tools: a broom without bristles, a mouse pad, a retractable pen, a rolling pin, and a metal spatula. Here's the catch - the spatula is too wide for the narrow gaps between the books on the shelf. How will you retrieve the note?	Yes	Step 1. Wedge the handle of the spatula into the space where the note is, and get the handle underneath the note. Pull the spatula handle upwards. Step 2. Repeat as necessary.
708	A poster needing to hang in the library but no ladder is available. Tools available: a broomstick, a mop, sticky tape, a long scarf, and table. The ceiling where the poster needs to hang is too high even when standing on the table with the broomstick. How can you hang up the poster?	No	It's not feasible to solve due to no provided items which can reach the portion of ceiling where the poster needs to hang.
708	A poster needing to hang in the library but no ladder is available. Tools available: a broomstick, a mop, sticky tape, a long scarf, and table. The ceiling where the poster needs to hang is too high even when standing on the table with the broomstick. How can you hang up the poster?	No	unsolvable, because there is no way to reach the height to hang the poster with the given tools including the table and the broomstick. There is no way to increase your reach.
715	A laptop falling off a table due to an uneven surface, but no laptop stand is available. Tools available: text books, a Bento box, mouse pad, and a plastic chopping board. However, the textbooks are softcover and cannot support the weight of the laptop. How can you make a laptop stand to level the surface?	Yes	Step 1. Use the mouse pad and place it upside down on top of the bento box, this should create enough friction so the laptop does not slide around and creates a stable surface.
722	A bird snatched away your only hair tie while setting up a picnic. You need to keep your hair up. The items available - picnic blanket, wet wipes, a plastic bag, sunglasses and a bandana. Unfortunately, your bandana is small, more a decorative item than a practical head wrap. What can you use to tie your hair back?	Yes	Step 1. Use the wet wipes as a hair tie by stretching one out then rolling it tight. Wrap it around your hair then knot it.
728	You're in a park on a hot day but your umbrella is broken. Available tools: a large leaf, two sticks, a water bottle, bandana, and sunglasses. However, the leaf is fragile and torn and the bandana is very thin. How can you make a shade?	Yes	Step 1. Use the sticks to soften the dirt then spike them deep into the dirt to act as two posts with the sun angled between them. Step 2. Use the bandana and the leaf and fasten them to the tops of the two sticks, creating a spot of shade.
728	You're in a park on a hot day but your umbrella is broken. Available tools: a large leaf, two sticks, a water bottle, bandana, and sunglasses. However, the leaf is fragile and torn and the bandana is very thin. How can you make a shade?	No	Unsolvable because the bandana is too thin and too small to provide reasonable shade, and we lack sufficient items to form a secure framework to hold it in place.
732	You need to attach a new swimming lane marker, but you don't have any clips. You have available plastic pool toys, a snorkel, a pool skimmer net, duck tape, weighted diving rings, and a pool umbrella. However, the duct tape has lost its stickiness due to being stored in damp conditions. How can you attach the marker?	No	Unsolvable because none of the listed items are suitable for replacing the missing clips or otherwise attaching the swimming lane marker.
732	You need to attach a new swimming lane marker, but you don't have any clips. You have available plastic pool toys, a snorkel, a pool skimmer net, duck tape, weighted diving rings, and a pool umbrella. However, the duct tape has lost its stickiness due to being stored in damp conditions. How can you attach the marker?	Yes	Step 1. Roll the net up so that you can use it, more or less, like a rope. Step 2. Tie one end of the net to the end of the lane marker in the pool. Step 3. Place the (closed) umbrella on the ground and tie the other end of the net to it. Pull the umbrella away from the pool until the net is taught. Step 4. If necessary, the umbrella can slip through the diving rings to give it more weight.
733	You want to play a game of water polo but don't have a proper water polo goalpost. You have pool noodles, duct tape, flip flops, and a floating lounger. Unfortunately, the duct tape is used up and the pool noodles are too short. How can you make a makeshift goalpost?	Yes	Step 1. Use the floating pool lounger as a goalpost, setting it on the edge of the pool to keep it in place.
735	You want to teach your children to swim, but you don't have any flotation devices. Your available items are a cooler, a yoga matt, a bucket, a large plastic container, and some duct tape. The large plastic container has a huge crack in it, making it impossible to stay inflated. How can you create a flotation device with these items?	Yes	Step 1. Use the yoga mat to form a long roll, lengthwise. Step 2. Use the duct tape to bind either end of the yoga mat roll to keep it from unrolling. Step 3. Use this long tube as a flotation device.
735	You want to teach your children to swim, but you don't have any flotation devices. Your available items are a cooler, a yoga matt, a bucket, a large plastic container, and some duct tape. The large plastic container has a huge crack in it, making it impossible to stay inflated. How can you create a flotation device with these items?	Yes	Step 1: use the bucket upside down. The air inside should keep it afloat if held on both sides and doesn't turn.
737	Your pool's ladder broke and you need to get out. You have pool noodles, a pool cover, a large beach towel, a life vest, and a cooler. The pool noodles are too soft and flexible to hold any weight and the pool cover is torn. How can you get out of the pool?	No	Unsolvable, because none of the tools or items provided in the scenario can help you climb out of the pool compared to a functional ladder.
737	Your pool's ladder broke and you need to get out. You have pool noodles, a pool cover, a large beach towel, a life vest, and a cooler. The pool noodles are too soft and flexible to hold any weight and the pool cover is torn. How can you get out of the pool?	Yes	Step 1.Use the pool cover and tie it around a fixed structure if there are any available and pull yourself out. Step 2. If Step 1 not possible, use the cooler as a floatation device. Empty out the cooler than close it to seal it. You can now use it give yourself some extra leverage to climb out of the pool.
749	You've finished your grocery shopping and it's raining heavily outside. You realize you forgot your umbrella. Tools available: a large trash bag, duct tape, a newspaper, a broom, and a metal hanger. The challenge is the trash bag is full of holes, making it unsuitable for use as a raincoat. How do you stay dry while getting to your car?	Yes	Step 1. Bend the metal hanger into a round shape. Step 2. Bend the handle of the metal hanger down and straighten it. Step 3. Use the duct tape to tape the metal hanger to the broom stick. Step 4. Duct tape the trash bag to the hanger to make an umbrella. Step 5. Cover any holes in the bag with duct tape.
749	You've finished your grocery shopping and it's raining heavily outside. You realize you forgot your umbrella. Tools available: a large trash bag, duct tape, a newspaper, a broom, and a metal hanger. The challenge is the trash bag is full of holes, making it unsuitable for use as a raincoat. How do you stay dry while getting to your car?	No	Unsolvable, because there is not enough strong material to adequately cover yourself.
765	You're out on a picnic and forgot to bring a bottle opener for your wine. Tools available: a car key which is a smart key and doesn't have a metal part, a pen which is oddly shaped, your shoe, a belt, a picnic blanket and a picnic basket. Given the limitations of your tools, how do you open the wine bottle?	Yes	Step 1. Take the pen and jam it diagonally into the cork as far as you can go. Step 2. Pull up on the pen in a steady and constant manner until the cork is popped out from the bottle.
765	You're out on a picnic and forgot to bring a bottle opener for your wine. Tools available: a car key which is a smart key and doesn't have a metal part, a pen which is oddly shaped, your shoe, a belt, a picnic blanket and a picnic basket. Given the limitations of your tools, how do you open the wine bottle?	No	Unsolvable, because with these items there is no way to effectively grab the cork. There's nothing that could stick into the cork and amount to anything, and there's nothing to get around the cork with.
768	You're out for sushi but left your chopsticks in the car. Tools available: a few straws, a pair of sunglasses, a make-up pencil from your purse which is very short, your phone, a hair tie which is stretched out and loose. Despite these problems, how do you use these items to eat your sushi?	Yes	Step 1. Use straws as makeshift chopsticks, they should have enough tensile strength to lift sushi.
768	You're out for sushi but left your chopsticks in the car. Tools available: a few straws, a pair of sunglasses, a make-up pencil from your purse which is very short, your phone, a hair tie which is stretched out and loose. Despite these problems, how do you use these items to eat your sushi?	Yes	Step 1. Use the arms of the sunglasses to grab the sushi and eat it.
771	At a food truck park, your takeout food is getting cold and you want to reheat it. Tools available: car engine, foil paper that is very thin and tears easily, a rock, a can of soda, a cloth bag. How do you reheat the food taking into account the condition of available tools?	No	unsolvable, because the car engine is not a reliable heat source that it is dangerous to use it to reheat the food.
771	At a food truck park, your takeout food is getting cold and you want to reheat it. Tools available: car engine, foil paper that is very thin and tears easily, a rock, a can of soda, a cloth bag. How do you reheat the food taking into account the condition of available tools?	No	None of the listed items can safely be used as a heat source to meet the goal of heating the food.
1076	During a camping trip in the rain, you realize that your tent has a leak. The tent is too high for you to reach the leaking spot. The available items are a pair of boots, a sketchpad, a pocket knife, a carabiner, a tin can, a pack of zip ties, a headlamp, and a plastic tarp. How can you fix the leak in your tent using only these items to keep yourself dry during the night?	Yes	(You have to go outside for a bit and get wet, but this shouldn't take long.) Step 1. Attach the carabiner to the tarp. Step 2. Put your boots on and grab the headlamp so you can navigate. Step 3. Make your way outside. Throw the carabiner, with tarp attached, over the tent so that the tarp will rest atop the tent. Step 4. When the tarp is situated most effectively--so that it is preventing rain …
1076	During a camping trip in the rain, you realize that your tent has a leak. The tent is too high for you to reach the leaking spot. The available items are a pair of boots, a sketchpad, a pocket knife, a carabiner, a tin can, a pack of zip ties, a headlamp, and a plastic tarp. How can you fix the leak in your tent using only these items to keep yourself dry during the night?	Yes	Step 1. Use a boot's shoestring to tie it to a corner of the tarp. Step 2. Use this boot to carry one end of the tarp up and over the tent by tossing the boot, holding onto the other end of the tarp. Step 3. Use the tarp to cover the top of the tent, thus covering the leak. Step 4. Use zip ties to attach the tarp's corners to the tent poles to keep the tarp in place overnight.
1078	You are stuck in a downpour and need to mark your location for rescue. The water bottle is opaque, meaning it won't glow brightly enough even with the glow sticks inside. You have a pair of binoculars, a plastic water bottle, a bandana, a hairbrush, a pack of glow sticks, a whistle, a roll of aluminum foil, and a tube of sunscreen. How can you create a visible and audible distress signal using on…	Yes	Step1 Use the bandana to tie the glow sticks to the hairbrush to increase its reach. Step2 Spread the aluminum foil that it creates a louder sound when rain falls onto it. Step3 Activate the glow sticks then wave the hairbrush in the rain. Step4 Blow the whistle to draw more attention.
1078	You are stuck in a downpour and need to mark your location for rescue. The water bottle is opaque, meaning it won't glow brightly enough even with the glow sticks inside. You have a pair of binoculars, a plastic water bottle, a bandana, a hairbrush, a pack of glow sticks, a whistle, a roll of aluminum foil, and a tube of sunscreen. How can you create a visible and audible distress signal using on…	No	Unsolvable because none of the items are capable of making a marker that will be sufficiently visible in a downpour. There's no way to adhere the glowsticks to something, nothing sturdy for a framework, and no listed item is tall enough to be visible from a distance in the rain.
1082	You want to create a DIY bedside table but don't have any spare furniture. The available items are a pack of binder clips, a glue gun, a wooden board, a roll of decorative contact paper, a pair of scissors, a small basket, a stack of books, and a can of spray paint. However, the stack of books is not stable and may fall if the wooden board is placed on top. How can you create a functional bedside…	Yes	Step 1. Use the glue gun between each individual book in the stack to create a stable and tall surface. Step 2. Use the glue gun to affix the wooden board to the stack of books, creating a larger surface on top of the glued stack of books.
1082	You want to create a DIY bedside table but don't have any spare furniture. The available items are a pack of binder clips, a glue gun, a wooden board, a roll of decorative contact paper, a pair of scissors, a small basket, a stack of books, and a can of spray paint. However, the stack of books is not stable and may fall if the wooden board is placed on top. How can you create a functional bedside…	No	Unsolvable, since there's no way to make the legs for the table, and aside from the books, there's nothing that would raise the board enough to work as a table. The binder clips wouldn't be nearly strong enough.
1083	You want to mount a curtain rod in your bedroom, but the available wall space is limited. The available items are a step ladder, a piece of rope, a pair of scissors, a pack of adhesive hooks, a small broomstick, curtain rings, a roll of double-sided tape, and a tension rod. However, the tension rod is too small compared to the wall's width. How can you successfully mount the curtain rod using onl…	Yes	Step1 Mount the adhesive hooks on the wall to the designated locations to mount the curtain rod. Step2 Use the scissors to cut the bristles of the broomstick. Step3 Thread the broomstick through curtain rings and hang it on the adhesive hooks.
1083	You want to mount a curtain rod in your bedroom, but the available wall space is limited. The available items are a step ladder, a piece of rope, a pair of scissors, a pack of adhesive hooks, a small broomstick, curtain rings, a roll of double-sided tape, and a tension rod. However, the tension rod is too small compared to the wall's width. How can you successfully mount the curtain rod using onl…	Yes	Step 1. Use the adhesive hooks to create a stable hold for the curtain rod.
1316	You're cooking a meal in the dining room and accidentally spill a pot of hot soup on the floor. The soup is spreading quickly, and you need to contain it before it reaches other furniture or carpets. The only items available are a non-absorbent foam pad, a plastic spoon, a tablecloth made of a fine mesh material, a pair of rubber gloves, a roll of tin foil, and a stack of paper plates. How can yo…	No	The soup cannot be contained or cleaned with the listed items. We have nothing absorbent to use for this task, and no water to finish cleaning up.
1316	You're cooking a meal in the dining room and accidentally spill a pot of hot soup on the floor. The soup is spreading quickly, and you need to contain it before it reaches other furniture or carpets. The only items available are a non-absorbent foam pad, a plastic spoon, a tablecloth made of a fine mesh material, a pair of rubber gloves, a roll of tin foil, and a stack of paper plates. How can yo…	No	Unsolvable, because there is no way to contain or absorb the soup. Using the tablecloth as, well, a cloth to absorb the soup would ruin the tablecloth--so that's not feasible. Paper plates could scoop up SOME of the soup, but definitely not all of it.
820	You're chowing down on your delicious soup when you suddenly drop the only spoon at a camping dinner. Available tools: a Swiss army knife, a tin can, metal wire, duct tape. The Swiss army knife is blunt, making it hard to manipulate the tin can. How can you create a makeshift spoon?	No	This is unsolvable because the listed items are not capable of making a spoon that is safe to eat soup from. Duct tape doesn't do well in liquid or heat. Wire cannot hold liquid. Nothing is capable of manipulating the can. And we cannot properly clean the items to be safe for food consumption.
820	You're chowing down on your delicious soup when you suddenly drop the only spoon at a camping dinner. Available tools: a Swiss army knife, a tin can, metal wire, duct tape. The Swiss army knife is blunt, making it hard to manipulate the tin can. How can you create a makeshift spoon?	Yes	Step 1. Use the Swiss army knife to cut out a section of the tin can. I know it says the knife is blunt, but it doesn't say it can't cut the tin can. Step 2. Use the duct tape to cover the edges of the cut out section. Bend this into the shape of a spoon. When done take the tape off to reuse in step 4. Step 3. Use the metal wire around the handle portion of the shaped spoon for better grip. Step …
