# Supplementary material
Source: ML conference proceedings conference paper supplement (https://openreview.net/forum?id=W48CPXEpXR)
Supplement: supplementary_material [file attachment]

## Sheet: Sheet1
ID	Problem	Solvable?	Unconventional?	Solution	Label
541	You spilled red wine on the hotel carpet and want to clean it up before the housekeeping staff reports this. Tools available: a bottle opener, a plastic cup, a toothbrush, a bottle of mineral water that is sealed shut, a pack of sugar, a white bath towel, a bar of soap, a hair dryer. How do you clean up the wine stain using only these items?	Yes	unconventional	Step1: Open the bottle of mineral water with the bottle opener. <br> Step2: Wet the white bath towel with your mineral water. <br> Step3: Dab, don't rub, the wine stain with your wet towel. <br> Step4: Use soap and a bit of water to form soap suds and apply to the stain.<br> Step5: Scrub gently with the toothbrush.<br> Step6: Rinse with more mineral water.<br> Step7: Dry using the hairdryer.	inefficient
542	You accidentally locked your only pair of glasses in your suitcase and are unable to see the lock combination. Tools available: a mirror, a cup of coffee, a pen, a smartphone with a dying battery, a piece of paper, a hotel room key. The room is incredibly dark due to a power outage. How do you unlock the suitcase using only these tools?	Yes	conventional	Step1: Use the remaining battery in your smartphone to turn on the flashlight. <br> Step2: Position the mirror such that the light from the flashlight is reflected onto the suitcase lock. <br> Step3: Hold the cup of coffee at a proper distance, such that the reflected light gets refracted and magnified on to the combination lock.<br> Step4: Now try to distinguish the digits or any signs of wear o…	infeasible
543	You have an important meeting but your suit is wrinkled. The hotel does not provide a iron. Tools available: a table lamp, a damp towel, a hair dryer, a bathroom with a broken shower head, a hot water kettle, a coat hanger. How do you remove wrinkles from your suit using only these items?	Yes	unconventional	Step1: Hang the suit on the coat hanger on the shower rod. Step2: Fill the kettle and bring the water to boil. Step3: Carefully hold the kettle under the suit, allowing the steam to rise and penetrate the fabric, removing wrinkles. Step4: Use the hair dryer on a low, cool setting to eliminate any remaining dampness from the suit.	inefficient
544	The hotel bathroom door handle is broken and you can't exit. Tools available: a smartphone with low battery, a hair comb, a teaspoon, a toothbrush, a wire hanger, a hotel shoe horn, a bottle of lotion. The door handle doesn't have any openings. How do you get out using only these tools?	Yes	unconventional	Step 1: Unbend the wire hanger and flatten it out to use as a poking tool or a lever.<br> Step 2: Try to insert the flat hanger between the door and the door frame at the height of the lock, and wiggle it to try to pop the lock open.<br> Step 3: If this doesn't work, use the shoe horn for extra leverage to attempt to pop the door open.<br> If these steps do not work, use the smartphone to call th…	inefficient
545	The hotel's WiFi signal is weak and you have an important video call. Tools available: a luggage rack, a pierced tin can, a clothes hanger, a bedside lamp, chewing gum, a water bottle, aluminum foil. How do you boost the WiFi signal using only these items?	Yes	conventional	Step1: Using the clothes hanger, create a hook shape.<br> Step2: Wrap the aluminium foil around the hooked part of the hanger densely to form an antenna-like shape.<br> Step3: Attach the antenna to the luggage rack to increase its height.<br> Step4: Position the DIY antenna towards the location of the WiFi router.<br> Step5: Connect pierced tin can with an aluminum foil path to your electronic de…	infeasible
547	You accidentally dropped your hotel key card down a narrow, deep vent and can't reach it by hand. Tools available: a hanger, a piece of thread, a too short selfie stick, a fork, a roll of duct tape, a rubber band, a straw. How do you retrieve your key card using only these items?	Yes	unconventional	Step1: Unroll some duct tape, sticky side out, and wrap it around the end of the selfie stick. <br> Step2: Attach additional length using the hanger, securing with more duct tape.<br> Step3: Lower this apparatus into the vent, aiming to stick the tape to the key card.<br> Step4: Once stuck, carefully pull up the tool to retrieve the key card.	infeasible
548	The smoke detector in your hotel room is constantly beeping due to low battery and disturbing your sleep. Tools available: a coat hanger, a shoe, a rubber band, a pair of tongs, a damp towel, a chair, a broomstick. The detector is set quite high on the ceiling. How do you silence the smoke detector using these items?	Yes	unconventional	Step1: Use the chair to reach the smoke detector. <br> Step2: Use the broomstick to press the 'mute' or 'silence' button usually located on the detector. <br> Note: This action should only be performed temporarily. It is unsafe to have a non-functional smoke detector. You should notify the hotel management immediately.	inefficient
549	You have accidentally spilled coffee on your bed and room service won't be available until morning. Tools available: a towel, a bottle of mineral water, a bucket, a hand fan, an ice bucket, a magazine, a hairdryer that is broken, a bar of soap. How would you clean and dry the stain using only these items?	Yes	unconventional	Step1: Use the towel to blot up as much coffee as possible. <br> Step2: Wet the bar of soap with the mineral water and scrub it over the stain. <br> Step3: Use the remaining mineral water to rinse the area, being careful not to spread the stain. <br> Step4: Use the towel again to soak up as much water as possible. <br> Step5: Use the magazine to fan the area and help speed up the drying process. …	inefficient
421	You need to propagate some leaf cuttings from your favorite plant, but you don't have any rooting hormone or potting mix. Items available include some cotton balls, a jar of honey, a cup of sand, a small bowl of coconut water, a roll of yarn, a piece of cloth, a rubber glove, and a packet of salt. However, due to its thicker consistency, the honey can't be used for rooting as it may actually suff…	Yes	conventional	Step1: Moisten the cotton balls with coconut water.<br> Step2: Wrap the cut end of the leaf cuttings in the moistened cotton.<br> Step3: Use strings of yarn to secure the cotton balls.<br> Step4: Fill the jar with sand and insert the cuttings, ensuring the cotton ball touches the sand. <br> Step5: Cover the jar with a piece of cloth, using yarn to secure it.<br> Step6: Regularly sprinkle the sand…	inefficient
422	Your garden shed door is jammed shut, and your garden tools are locked inside. Tools available to you include a frying pan, a pair of high heels, a skateboard, an old lasso, a roll of wrapping paper, a wooden table leg, a basketball, and a plastic bucket. The shed door, however, is reinforced and the lock is jammed internally. How can you open the shed door with these items?	Yes	unconventional	Step1: Use the wooden table leg as a battering ram to hit the door near the lock. The strength of the table leg could generate enough force to knock the jammed lock loose.<br> Step2: Once you've loosened the lock, use the old lasso to pull the handle or latch, opening the door. <br> NB. Skateboards, basketballs, high heels, frying pans, wrapping paper, and plastic buckets would not be helpful in …	inefficient
423	Your container plants need to be fertilized, but you have run out of store-bought plant food. Items available include a box of baking soda, a can of soda, some Epsom salt, leftover coffee grounds, a bottle of vinegar, a tub of yogurt, a packet of yeast, and a bottle of olive oil. Your plant is, however, sensitive to Epsom salt and soda. How can you create a nutritious feeding solution using these…	Yes	unconventional	It is possible. Step1: Use leftover coffee grounds as a fertilizer because they are rich in nitrogen which is beneficial to plants. Step2: Mix some yeast into the soil, it will break down plant material and release nutrients into the soil. Step3: Mix a small amount of vinegar into the water for acidity if the plants require it. Lastly, avoid using baking soda, soda, Epsom salt, olive oil, and yog…	infeasible
424	Your garden hose has sprung a leak, and you don't have a hose repair kit. Items available include an old tire tube, a plastic bag, a rubber band, duct tape, an inflatable pool ring, a beach ball, a pair of scissors and a spoon. The constraint here is that the hole in the hose is too large to be covered by just a rubber band and plastic bag. How can you temporarily fix the leak in the garden hose …	Yes	unconventional	Step1: Cut a small piece from the tire tube using the scissors. Step2: Wrap it around the hole in the hose securely. Step3: After the tube piece is placed, wrap layers of duct tape around it and the hose to secure the tire tube piece in place and stop the leak.	infeasible
427	A small tree in your garden is starting to lean and needs extra support. Tools available to you include a plastic coat hanger, a pack of chewing gum, a roll of duct tape, a cardboard tube, a bath towel, a crowbar, a metal ruler, a bag of cotton balls, a box of tissue paper, a spool of thread, a beach umbrella and a roll of wire. But the cardboard tube is not strong enough to support the tree and …	Yes	unconventional	Step1: Open the beach umbrella and position it next to the leaning tree so that the top touches and provides support.<br> Step2: Wrap the roll of wire around both the tree and the umbrella, high up, to secure the umbrella to the tree.<br> Step3: Gather the duct tape, crowbar, metal ruler, and coat hanger for additional stability. Use the crowbar to hammer the metal ruler and coat hanger into the …	inefficient
429	You need to create a new pathway in your garden to make it easier to reach your flower beds. Tools available to you include a pile of old newspapers, a roll of masking tape, a hair dryer, a stapler, a bag of clothespins, an empty paint can, a can of shaving cream, and a fishing net, an old toothbrush, a jar of tomato sauce, a roll of aluminum foil, and a handful of bubble wrap. However, the garde…	Yes	unconventional	Step1: Lay down the aluminum foil over the wet ground as the base of the pathway. <br> Step2: Use the masking tape to secure it on the edges.<br> Step3: For additional stability and grip, sprinkle some clothespins around the foil path. The metal and wood will provide enough traction to prevent slipping.	efficient
430	Some potted plants on your windowsill have dried out due to lack of water, but you don't have a watering can at hand. Tools available to you include a bottle of mouthwash, a pair of tongs, a roll of bubble wrap, a soup ladle, a TV remote, a tube of toothpaste, a roll of aluminum foil, and a wad of plastic grocery bags, a jar of pickles, a ping pong ball, a rubber band, and a wooden spatula. The c…	Yes	unconventional	Step1: Empty the mouthwash bottle and rinse well. <br> Step2: Fill the cleaned mouthwash bottle with water. <br> Step3: Use the mouthwash bottle to water the potted plants.	efficient
431	A wild animal is nibbling on your freshly planted flowers, and you need to find a way to keep it away. Tools available to you include a handful of cotton balls, a toy rubber duck, a roll of wax paper, a pair of rollerblades, a bottle of ketchup, a box of thumbtacks, a yoga mat, a beach umbrella, a pair of binoculars, a package of birthday candles, a small mirror which is broken into small, unusab…	Yes	unconventional	Step1: Take thumbtacks and the yoga mat. Place the thumbtacks point-up on the mat and place it around your flowers as a deterrent. <br> Step2: Use the beach umbrella to cast a shadow over the flowers, as some animals avoid shaded areas. <br> Idea is animals won't want to step on the tacks and risk getting hurt, and casting a shadow may make the area less appealing to them.	inefficient
432	Your garden has started to accumulate trash that has been blown in by the wind. Tools available to you include a rubber duck, a stack of newspaper, a sheet of sandpaper, a roll of plastic wrap, a frisbee, a ping pong paddle, a swimming goggles, a lava lamp, an ice cube tray, a pair of tweezers, an old sock which is filled with holes, and a set of chopsticks which are flimsy and easily break. How …	Yes	unconventional	Step1: Put on the swimming goggles for protection. Step2: Use the tweezers and chopsticks to pick up larger pieces of trash. Step3: Use the old sock to sweep smaller pieces of debris into a pile. Step4: Wrap the collected trash with plastic wrap. Step5: Use the sandpaper to dig a small hole. Step6: Bury the plastic-wrapped trash in the hole and cover it with soil. Step7: Use the newspaper to cove…	infeasible
433	A swarm of insects is invading your flower bed, and you need to find a way to repel them without using chemicals. Tools available to you include a bag of coffee beans, a broken umbrella, a shoehorn, a cookie cutter, a wristwatch, a piece of chalk, a basketball glove, a toy whistle, a hand fan, a musical instrument which is a violin with a broken string, a pot of boiling water, and a foam finger. …	Yes	conventional	Step1: Brew some coffee using the bag of coffee beans and the pot of boiling water. Coffee has a smell that repels insects naturally.<br> Step2: Once the coffee has cooled, pour it into the broken umbrella, using it as a makeshift container.<br> Step3: Use the hand fan to waft the scent of the coffee towards the flower bed, helping to repel the insects away.	inefficient
435	A vine is starting to grow too close to your house and needs redirection. Tools available to you include a flashlight, a football, a pack of tissue paper, a toy rubber band ball, a toothbrush, a pair of earplugs, a mouse trap, a can opener, a safety pin, an empty ice cream container which is small and has a hole in it, a pizza delivery menu, and a potted plant. How to redirect the vine without da…	Yes	unconventional	Step1: Use the toothbrush to gently detangle the vine from its current pathway. <br> Step2: Position the potted plant in the direction you want the vine to grow. <br> Step3: Link together the safety pin, rubber band ball, and earplugs to create a makeshift trellis or guide for the vine. <br> Step4: Secure this guide into the potted plant's soil, then gently wrap the vine around it, maneuvering it…	inefficient
436	The garden fence is on the verge of collapse, and you need a temporary fix until it can be properly repaired. Tools available to you include a roll of toilet paper that is very thin and disintegrates easily, a chess board, a screwdriver with a broken handle that is too short, a bottle of white-out, a box of matches, a bag of marshmallows, an air freshener, a wire coat hanger, a pot lid, a pair of…	Yes	unconventional	Step1: Unbend the wire coat hanger and push one end into the ground next to the fence for support.<br> Step2: Use the chess board as a brace, propping it up against the hanger and the part of the fence that needs support.<br> Step3: Use the set of watercolor paints to mark any areas that need immediate repair once a full repair job can be done.<br> (Use: coat hanger, chess board, watercolor paint…	inefficient
439	An unsightly weed has sprouted up in your flower bed, and you need to remove it. Tools available to you include a wireless mouse, a photo album, a paper punch, a toy airplane, a spool of thread, a packet of cookies, a blender, a pair of 3D glasses, a ruler which bends when you try to dig with it, a cracked bell, a pair of slip-on shoes, and a comb. How to remove the weed without harming the surro…	Yes	unconventional	Step1: Put on the slip-on shoes to protect your feet. <br> Step2: Use a comb, if it's durable enough, to dig around the weeds' roots as best as you can. You want to minimize damage to the flower roots around it.<br> Step3: Once it's loosened enough, pull it out.<br> If the comb cannot accomplish this task, no other tools given seem capable to safely remove a weed, making the task impossible.	inefficient
440	A bird's nest in your garden tree is precariously positioned and is in danger of falling. Tools available to you include a set of old keys, a placemat, a broken radio, a spoon, a bungee cord which is too short to wrap around the tree and the nest, a paper plate, a slice of stale bread, a telescope, an empty picture frame, a tissue box, a bookend, and a coat hook. How to safely secure the nest to …	Yes	unconventional	Step1: Tie the bungee cord around the nest with the help of the spoon and coat hook. <br> Step2: Insert the other end of the bungee cord with keys and hook it onto a sturdy branch of the tree.<br> Step3: Use the bookend and old keys to wedge and stabilize the nest further.<br> Justification: The bungee cord tied with the spoon and hook can provide a strong grip on the nest and the keys can help t…	inefficient
441	You need to open a bottle of wine, but you don't have a corkscrew or bottle opener. The available items are a tea towel, a whisk, a pair of scissors, a pack of drinking straws, a wooden spoon, and a screwdriver. However, the screwdriver is out of reach, and the wooden spoon has a rounded, bulky handle that can't fit into the mouth of the bottle. How do you open the bottle?	Yes	unconventional	Step1: Use the scissors to carefully put a hole in the top of the cork.<br> Step2: Put one end of a drinking straw through the hole. <br> Step3: Blow into the other end of the straw to increase the pressure inside the bottle, pushing the cork out. Please ensure to hold the bottle securely using the tea towel to avoid any accident due to pressure release.	inefficient
442	You need to strain the boiling water from your cooked pasta, but you do not have a strainer or colander. Your available items include a saucepan lid, a wooden cutting board, an oven mitt, a large Ziploc bag, salad tongs, and a cookie sheet. The problem is, the saucepan lid fits perfectly onto your pot of pasta, and there are no holes to drain water. How do you strain your pasta?	Yes	unconventional	Step1: Use the oven mitt to carefully lift the pot of pasta. <br> Step2: Hold the saucepan lid slightly askew on the pot to create a small gap, ensuring the lid would prevent the pasta from falling out. <br> Step3: Very carefully, pour off the boiling water through the gap into the sink. This can be done by tilting the pot over the sink.	infeasible
443	You need to crush some ice for making cocktails, but you don't have an ice crusher or blender. The available items are a water bottle, a rolling pin, a pair of rubber gloves, a meat mallet, a clean cloth, and a Ziploc bag. Unfortunately, the bags available are small snack-size Ziploc bags, and the meat mallet is missing its head. How do you prepare the crushed ice?	Yes	unconventional	Step1: Put on the rubber gloves to prevent your hands from getting cold.<br> Step2: Fill the small Ziploc bag with ice.<br> Step3: Wrap the bag with ice in the clean cloth to prevent ice from flying around.<br> Step4: Use the rolling pin or the handle of the meat mallet to crush the ice by firmly hitting the bag wrapped in the cloth.<br> Step5: Once the ice is crushed to your desired size, pour i…	inefficient
444	You realize that your fried eggs are rapidly overcooking, but your spatula is missing, and you need to remove them from the pan quickly. Your available tools are a cheese knife, a food storage container lid, a plastic scraper, a silicone brush, a pair of toothpicks, and a wooden skewer. But the cheese knife is dulled and bent, and the eggs are too large and delicate. How do you remove the eggs fr…	Yes	unconventional	Step1: Use the food storage container lid to gently slide under the egg.<br> Step2: Carefully balance the egg on the lid and then transfer it to your plate.<br> Step3: If the egg is still stuck, use the plastic scraper or wooden skewer to gently nudge the egg onto the lid. Do not use the silicone brush or toothpicks as they are not sturdy enough.	infeasible
445	You need to zest a lemon for a recipe, but you don't have a zester. Tools available to you include a potato peeler, a wire cooling rack, a fork, a paring knife, and a coffee filter. However, your potato peeler is broken, and the fork is a cocktail fork with only two short, blunt tines. How could you zest the lemon with what's on hand?	Yes	conventional	Step1: Hold the lemon firmly with one hand. <br> Step2: Using the paring knife, carefully slice off the top layer of the lemon, trying to get only the yellow zest and avoiding the bitter white pith beneath. <br> Step3: Press the zest against the wire cooling rack and rub it back and forth to create finer pieces. This will simulate a cheese grater.	infeasible
446	You need to soften butter quickly but don't have a microwave. Items available to you include a block of ice, a cheese grater, a kitchen scale, a hot water bottle, and a drinking glass. The issue is, the cheese grater is already in use and cannot be cleaned in time, and the butter is frozen solid. How do you soften the butter using these items?	Yes	unconventional	Step1: Wrap the frozen butter in the hot water bottle which will begin to thaw it but not too rapidly.<br> Step2: Once the butter has started to soften, place it between the drinking glasses and press to flatten it out further which will speed up the process. Adjust the heat from the hot water bottle as needed to reach the desired softness.	infeasible
449	You accidentally spilled flour on the kitchen floor, but your broom and vacuum cleaner are broken. Available items include a shoebox, a pack of baby wipes, a dustpan, paper towels, a damp washcloth, and a frying pan. However, there isn't any running water, and the baby wipes are dried out. How do you clean up the flour mess?	Yes	unconventional	Step1: Use the shoebox like a dustpan to gather all the concentrated areas of flour. <br> Step2: Use the dustpan to pick up the collected flour from the shoebox and dispose it.<br> Step3: Use the dried baby wipes to wipe up the remaining flour on the floor.<br> Step4: Lastly, use the damp washcloth (if it's not too dirty yet) and paper towels to get rid of the remaining flour residue. <br> Tools:…	inefficient
332	A small piece of food is stuck in the narrow gap between the bed frame and the wall, which is too narrow for the wooden ruler to fit in. Items available include a plastic bag, a soda can, a small makeup brush, a teddy bear, a magazine, a wooden ruler, a pair of eyeglasses, a shoe, a table lamp, several puzzle pieces, and a sewing kit. How will you remove the food without staining the wall or bed?	Yes	unconventional	Step1: Use the handle of the makeup brush to try and reach the piece of food, attempting to push it out from the gap. <br> Step2: If Step1 fails, open the plastic bag and place it over the end of the makeup brush's handle, securing it with the string from the sewing kit. Insert this setup into the gap and try to bag the food piece. <br> Step3: Pull out the makeup brush gently, along with the bagg…	inefficient
333	Your curtain rod is not fully locked in place and is hanging dangerously from the wall. Despite having a cell phone case, a decorative bowl, a pillow, a battery charger, a deck of cards, a hand fan, a computer mouse, a feather duster, a pocket dictionary, a corkscrew, and an ethernet cable, the ethernet cable is quite short and cannot reach any item sturdy enough to act as a brace. How do you sec…	Yes	unconventional	Step1: Use the corkscrew to make a hole in the wall near the curtain rod. Step2: Bend the ethernet cable into a hook shape. Step3: Stick the hooked ethernet cable into the hole you just made with the corkscrew. Step4: Hang the curtain rod from the ethernet cable. This uses the corkscrew as a drill and the ethernet cable as a makeshift wall hook.	infeasible
334	A shard of glass is lodged in your extra firm type mattress, causing no deformation visible when pressed with a credit card. You have a credit card, a bicycle helmet, a toothpaste tube, a small notebook, a toy car, an eyeglass repair kit, a clothes hanger, a sewing needle, a pair of socks, a bottle of lotion, and a band-aid. How can you safely locate and remove the glass shard?	Yes	unconventional	Step1: Inflate the socks using the bicycle helmet as a makeshift air pump, creating a barrier for safety. Step2: Press the sock-airbag over the mattress, any sharp glass shard would create a noticeable leakage. Step3: Once located, use the eyeglass repair kit screwdriver to gently pry out the glass shard. Step4: Use a band-aid to cover the mattress puncture.	infeasible
337	Condensation has caused water droplets to form on your room's untreated wood window sill which could get damaged by any liquid. Available items include a bottle of perfume, a poster, a stack of sticky notes, a necktie, a toy car, a hairbrush, 3D glasses, a broom, a box of tissues, a CD case. How do you clean up the window sill without causing further damage?	Yes	conventional	Step1: Use the tissues from the box of tissues to gently dab and absorb the water droplets from the window sill. <br> Step2: Using the broom, ensure any excess water drip is swept away to a safer location where it cannot harm the wood.<br> Step3: Leave the window sill to air dry naturally, ensuring further condensation is unlikely by adjusting room temperature or ventilation.	infeasible
339	A paper airplane got stuck on your ceiling light fixture, which is an elaborate chandelier style. You have a set of keys, a chapstick, a flip flop, an eyeglass case, a pot of hair gel, a toothbrush, a pencil sharpener, a postcard, a coin, a small calendar, a pair of headphones available. How can you safely remove the paper airplane without causing damage to yourself or the fixture?	Yes	unconventional	Step1: Remove the headphones from the case. <br> Step2: With the help of your flip flop, gently prop the headphone cord towards the paper airplane. <br> Step3: Try to hook the cord onto the airplane to pull it down safely. This method is both safe and avoids any potential damage to yourself or the chandelier.	inefficient
340	Your desk drawer has become misaligned and difficult to open. However, the desk is made of metal. Tools available include a bottle of water, a keyring, a pair of pajamas, a hand towel, a coaster, a bottle opener, a shoebox, a pair of scissors, a coffee mug, a makeup compact, a paint roller, an ice cube tray. How do you realign the drawer and open it without damaging its contents?	Yes	unconventional	Step1: Use the hand towel to protect your hand and give a grip. <br> Step2: Place the coaster at the edge of the drawer as leverage. <br> Step3: Carefully use the scissors or keyring to adjust the alignment by prying open the drawer. You can use the bottle opener if the scissors or keyring don't work. <br> Step4: Once the drawer is partially opened, you can realign/adjust it further if needed.	efficient
341	Your stapler has run out of staples and you need to attach two pieces of paper together. You have an empty tape dispenser, a pencil, a hole puncher, a coffee cup, headphones, stamps, rubber bands, paperclips. However, the paperclips are too small to hold two pages together. How can you achieve this?	Yes	conventional	Step1: Use the pencil and mark where you want the pages attached.<br> Step2: Position the hole puncher over the pencil mark and punch a hole through both pages. <br> Step3: Thread the rubber band through the hole from the front of the pages to the back.<br> Step4: Loop the rubber band's end through itself to secure the pages together. This should attach the two pieces of paper using the rubber ba…	inefficient
342	You need to pin an important document on a corkboard. However, you ran out of push pins. You have a tape dispenser, sticky notes, a box of chalks, rubber bands, a pair of scissors, a ruler, a flashlight, a marker, a glue stick, a straw, and a stapler. Unfortunately, the pair of scissors are too blunt and not sharp enough to penetrate the corkboard. How can you pin it effectively?	Yes	conventional	Step1: Use the glue stick to apply adhesive on the backside of the document.<br> Step2: Press the document against the corkboard with glue side making the document stick to the corkboard.<br> Step3: For an added support, wrap a rubber band around the corkboard, passing it over the document.	inefficient
343	You are in need of a ruler for an urgent task but your ruler is missing. The items available are a pocket calculator, a hole puncher, a keyboard, sheets of paper, a clip, a cup, a stapler, sticky notes, pens, and pencils. However, the keyboard is an ergonomically shaped and therefore not straight or long enough to be used as a ruler. Can you make a ruler out of these?	Yes	unconventional	Step1: Use any A4 sized sheet of paper which is 29.7cm long.<br> Step2: Fold the paper lengthwise to get half (14.85cm) and quarter (7.425cm) measurements. <br> Step3: Repeated folding can give smaller measurements. <br> Step4: Use the calculator's straight edge for drawing straight lines if necessary.	efficient
344	You have a door in the office that needs to be propped open. The doorstop has been misplaced and you cannot find anything traditionally used to stop a door. You have a clipboard, a desk lamp, a stapler, a coat hanger, a binder, a magazine, a trash bin, highlighter, a paperweight. But the paperweight shape and material prevent it from holding the door. It's round and made of glass. How can this be…	Yes	unconventional	Step1: Take the trash bin and place it upside down in the open doorway. <br> Step2: Prop the door open against the upside-down trash bin. This will keep the door open without needing a traditional door stop. Tool: Trash Bin.	inefficient
345	You require to erase something written with a permanent marker on a non-porous surface like a whiteboard. Unfortunately, you don't have any whiteboard cleaner or alcohol-based solution. The items at your disposal are a pocket mirror, an eraser, a water bottle, a stapler, a marker, a ruler, a pack of chewing gum, and a pencil. However, the pencil you have is a non-erasable graphite pencil. How can…	Yes	unconventional	Step1: Use the marker to draw over the permanent marker's lines.<br> Step2: Immediately after, use the eraser to quickly rub over the area you just marked. This should help lift some of the permanent ink off the surface due to the solvents in the marker's ink.<br> Step3: Repeat step 1 and 2 until the permanent marker is totally erased.<br> Note: This method works best with an erasable marker.	inefficient
346	Your office chair’s wheel has come loose, and you don’t have any tools to fix it. You do have a notebook, printer paper, a cup, a desk lamp, a pair of scissors, a paperclip, a sticky note, a stack of paper, a bottle of water, a pencil, a stapler. Regrettably, the stack of paper is not sturdy and collapses under the weight of the chair. How can you prop the chair until you get the right tools to f…	Yes	unconventional	Step1: Take the scissors and use them to cut the cup in half.<br> Step2: Place the halved part of the cup under the loose wheel of the office chair.<br> This setup should temporarily hold the chair upright, making it somewhat usable until the right tools to fix the chair are found. The cut cup should provide some stability to the chair.	infeasible
347	A vital screw from your keyboard has fallen off and rolled under your heavy desk which can't be moved. The items you have are a stapler, a pen, a magnifying glass, a pile of paperclips, a charger, a straw from yesterday's lunch break, a cup, a mouse pad, your office handbook. But the straw is a flexible, bendy straw and not long enough to reach under the desk. How can you retrieve the screw?	Yes	unconventional	Step1: Unfold several paperclips and twist them together end-to-end to form a long, firm rod.<br> Step2: Insert the straw onto one end of the rod to act as a gripping tool.<br> Step3: Maneuver the rod under the desk and use straw to trap and retrieve the screw.	infeasible
349	You need to hang a calendar on the wall but alas, you don't have any sticky tape or tack pins. However, you have a box of chalk, a printer paper, a pair of sunglasses, hand sanitizer, a lanyard, a clip-on desk fan, a marker, stapler. Nevertheless, the lanyard is too short to hang from the wall. Can you make use of these to solve the problem?	Yes	conventional	Step1: Fold the printer paper so that it has a triangular shape. <br> Step2: Use the stapler to secure the form of the triangle.<br> Step3: Make a hole in the middle of the paper triangle and insert the marker, which will act as a holder.<br> Step4: Place the structure you've made on top of the desk fan. <br> Step5: Attach the calendar to the marker using the stapler.<br> Now your calendar will s…	infeasible
350	You've accidentally dropped your office access card into a narrow gap between bookshelves. You can't reach it with your hand. The available items are a clipboard, a stapler, a yardstick, a cup, a printer paper, a USB cable, packing tape, and a trash bin. However, the gap between the bookshelves is too narrow to fit the yardstick. How can you retrieve your access card using these items?	Yes	unconventional	Step1: Attach the USB cable to the clipboard using the packing tape - result is a long, thin, flexible reaching tool.<br> Step2: Slide the attached USB cable and clipboard into the narrow gap to reach the access card.<br> Step3: When the clipboard is over the card, drop the stapler onto the clipboard creating pressure that holds the card against the clipboard.<br> Step4: Carefully pull the USB ca…	infeasible
351	Your cat has climbed up a high tree and refuses to come down, and you don't have a ladder. Tools available include an air horn, a ball of yarn, a football, a tall, fragile broomstick, a thick blanket, and a flashlight. Your cat isn't easily amused by yarn and the broomstick can't withstand much weight or reach your cat. How will you help your cat come down using only these items?	Yes	unconventional	Step1: Spread the thick blanket on the ground under the tree to cushion any possible falls. <br> Step2: Use the flashlight to create a light-show on the tree, altering the cat's environment and possibly enticing it to come down. <br> Step3: If the light show doesn't work, use the air horn at a safe distance. The loud noise may frighten the cat and lead it to navigate down the tree. If the cat doe…	inefficient
352	Your pet fish tank's water has become cloudy, and the store is closed, so you can't buy a new filter. Tools available include an empty plastic bottle, in-adhesive duct tape, tiny coffee filters, a funnel, a hairdryer, and a pair of nylon stockings. The coffee filters won't fit the top of your plastic bottle and the duct tape can't secure them. How will you filter the water using only these items?	Yes	unconventional	Step1: Cut the top off the plastic bottle and invert it into the remaining bottom section. <br> Step2: Pull the nylon stockings over the inverted bottle top tightly.<br> Step3: Secure stockings with the non-adhesive duct tape to ensure they stay on.<br> Step4: Place the funnel on top of the stocking covered bottle opening.<br> Step5: Gradually pour the fish tank water into the funnel and allow it…	infeasible
353	Your pet bird has dropped its food in the narrow space behind its cage. Tools available include a stiff, short straw, a pile of newspapers, a flashlight, a fork, a vacuum cleaner with no suction, and flimsy long chopsticks. The chopstick bends under pressure and both the tweezers and straw cannot reach the food. How will you retrieve the food using only these items?	Yes	unconventional	Step1: Use the flashlight to locate the food behind the cage. <br> Step2: Roll the newspaper tightly around the fork, creating a long, stiff extension.<br> Step3: Secure the chopsticks to the end of the newspaper-fork extension using the vacuum cleaner's cord. This will prevent it from bending under pressure.<br> Step4: Use the extended, stiffened chopsticks to retrieve the dropped food.	infeasible
354	Your dog's leash has accidentally fallen into your swimming pool, and you don't want to get wet to retrieve it. Tools available include a hula hoop, goggles, a fishing rod with a broken line, a skateboard, a plastic bucket, and pool noodles. The line on the fishing rod is too short to reach the leash. How will you recover the leash using only these items?	Yes	unconventional	Step1: Take the pool noodles and tie them around the hula hoop, using the broken fishing line, to create a makeshift net. Step2: Stand at the edge of the pool, hold onto the edge of the hula hoop, and extend the hula hoop into the pool. Step3: Use the hoop to scoop up the leash. Step4: Carefully pull back and retrieve the leash.	inefficient
357	Due to a storm, your pet rabbit's temporary enclosure has become dirty with mud, and you need to clean it. Tools available include a small dustpan and a broom with soft bristles, a square-edged ice scraper, a laundry basket, a shallow pail, a stack of paper towels, and a plastic tablecloth. The bristles on the broom are too soft to move the mud and the dustpan can't hold much. How will you clean …	Yes	unconventional	Step1: Use the plastic tablecloth to cover the bottom of the enclosure, ensuring it overlaps the sides. <br> Step2: Use the square-edged ice scraper to scrape off the mud onto the plastic tablecloth.<br> Step3: Gather the corners of the plastic tablecloth to collect the mud, making sure not to spill it.<br> Step4: Carefully place the mud-filled tablecloth into the laundry basket, use the shallow …	inefficient
358	Your puppy chewed up a pillow, and now there are feathers everywhere. You don't have a vacuum cleaner available. Tools available include a yoga ball, a fan, a broom with a short, broken handle, a lint roller, and a roll of weak-adhesive packing tape. The tape can't pick up the feathers and the broom is difficult to use. How will you clean up the feathers using only these items?	Yes	unconventional	Step1: Use the broken broom to gather the feathers into a pile, despite the difficulty due to the short handle.<br> Step2: Once all the feathers are piled up, use the lint roller to pick up the feathers from the pile by rolling it over them, as it should be able to pick up feathers due to their light weight.<br> Step3: Continue lint rolling until all feathers are removed from the floor. The yoga …	inefficient
359	Your cat has managed to get itself onto the top shelf of a high bookcase, and you need to get it safely down. Tools available include a laser pointer with a dead battery, a pillow, a step stool, a soft blanket, a long stick, and a backpack. The laser pointer doesn't work and your cat doesn't respond to it. How will you help the cat down using only these items?	Yes	unconventional	Step1: Set up the step stool near the bookcase, ensuring it's stable. <br> Step2: Place the soft blanket and pillow at the base of the bookcase as a safety cushion.<br> Step3: Slowly ascend the step stool while holding the long stick. <br> Step4: Gently coax the cat onto the stick and slowly lower it to the ground.<br> Step5: If the cat refuses to get on the stick, use the stick to gently nudge i…	infeasible
481	You need to hang your clothes to dry while camping, but there's no clothesline. Tools available: a travel towel, paracord, a frying pan, a long tree branch, binder clips, a pocket mirror, a thermal blanket, a hammock, and carabiners. However, the trees are too far apart, making it impossible to connect them directly with the paracord. How do you create a makeshift clothesline using only these ite…	Yes	unconventional	Step1: Attach a carabiner to each end of the paracord.<br> Step2: Wrap one end of the paracord with a carabiner around a tree and clip it back onto the paracord creating a loop.<br> Step3: Repeat on another tree with the other end of the paracord.<br> Step4: Hang the branch on the paracord using the remaining carabiners, letting it sag under the weight.<br> Step5: Use the binder clips to hang you…	infeasible
482	You're camping and need a campfire poker, but you don't have one. Tools available: a pair of pliers, a compass, a pocketknife, a fishing line, a metal tent stake, a sturdy stick, a hammock, a water bottle, and a metal skewer. The problem is the stick is very short, making it unsafe to use for poking at the fire due to proximity to the flames. How do you create a makeshift campfire poker using onl…	Yes	unconventional	Step1: Take the metal skewer and the sturdy stick. <br> Step2: Use the pocketknife to create a flat surface at one end of the stick. <br> Step3: Position the broad end of the skewer onto the flat surface of the stick. <br> Step4: Use the fishing line to tie the skewer to the stick tightly, ensuring it's secure. <br> Step5: Use the pliers to cinch the fishing line knot tight. Now use this extended…	infeasible
483	You're hiking and need to cross a small river, but you're unsure of the depth and don't want to risk falling in. Tools available: a camping lamp, a piece of rope, a flask, a long sturdy branch, a carabiner, hiking socks, a small floating object, a map, and a hiking pole. The floating object is too small and gets instantly swept away by the fast-flowing river. How do you determine the depth of the…	Yes	unconventional	Step1: Attach the carabiner to one end of the rope. <br> Step2: Secure the other end of the rope to the sturdy branch. <br> Step3: Lower the carabiner into the river by holding the branch until it hits the river bottom. <br> Step4: Pull up the rope and measure the wet part of the rope using hiking pole. This will be the depth of the river. <br> In this process, we used the camping lamp for visibi…	infeasible
484	You need to start a campfire during your hike, but you've lost your matches and lighter. Tools available: a magnifying glass, a metal water bottle, a hiking mat, a compass, a chocolate bar, a rain jacket, twigs, a camping stove, dry leaves, aluminum foil, a flashlight, and a dry cloth. Unfortunately, it's a cloudy day, so there's not enough sunlight to start a fire with a magnifying glass. How do…	Yes	unconventional	It is not possible. The provided items do not contain the necessary tools or substances (like flint or chemicals) needed to create a spark or flame without the use of sunlight or pre-existing fire. The camping stove is useless without a spark or flame to ignite it.	none
485	Your camping tent pole is damaged, and you cannot set up your tent properly. Tools available: a hiking stick, a camping stove, a compass, Duct tape, a string, a clothesline rope, a large branch, some zip ties, an air mattress, a pillow, and a small tarp. Making things difficult, the branch is too large, and even after trying to resize it with the pocket knife, it doesn't fit. How do you fix the t…	Yes	unconventional	Step1: Use the hiking stick as a substitute for the broken tent pole. If the stick is not tall enough, tie the clothesline rope around the top of the stick and anchor it to a nearby tree for additional height.<br> Step2: Use Duct tape and zip ties to secure the stick in place and attach it to the tent.<br> Step3: Make sure all parts are secure, and the tent is properly set up. If gaps are present…	efficient
486	You find yourself in the middle of a rainstorm while on a hike, and you need to protect your backpack that doesn't have a rain cover. Tools available: an air mattress, a map, a poncho, a small towel, a large trash bag, a hiking pole, an umbrella, several rubber bands, a flashlight, and waterproof tape. There's a big hole in the trash bag, so it no longer provides protection against rain. How do y…	Yes	unconventional	Step1: Wear the poncho and put your backpack under it to keep it dry. Step2: If additional protection is needed, wrap the backpack in the air mattress and secure with rubber bands and waterproof tape. Use the hiking pole to handle the wrapped backpack underneath the umbrella for additional protection. The other items can be stored inside the backpack.	efficient
488	Your shoe's sole has come off during your hike, and you need to fix it temporarily. Tools available: a safety pin, a small sewing kit, a headlamp, a canteen, hot glue gun (without glue), a paperclip, a compass, a fishing line, zip ties, a toothpick, and duct tape. However, it's snowing heavily, and the duct tape doesn't stick properly because it's too cold. How do you fix your shoe using only the…	Yes	unconventional	Step1: Thread the fishing line through the eye of the safety pin. <br> Step2: Use the safety pin as a makeshift needle to sew the sole back to the shoe, using an over-under pattern to ensure a tight hold. <br> Step3: Once secure, use the zip ties to tie around the shoe and sole for extra stability. <br> Note: Keep the headlamp for illumination if this task is being performed under low light condi…	inefficient
489	You need to create an improvised shelter during a hike as the sun is too strong. Tools available: a large tarp, a compass, a paracord, a poncho, a thermal blanket, clothespins, a water bottle, a camping stove, an inflatable camping mat, a lightweight blanket, and hiking poles. The problem is the terrain is too rocky, making it hard to set up the poles. How do you create a shelter using only these…	Yes	unconventional	Step1: Use the hiking poles to prop open the poncho on the rockiest part of the terrain with the help of the paracord. <br> Step2: Cover the poles and poncho setup with the large tarp for additional sun protection, securing it with the clothespins. <br> This setup helps you create a shelter that combats the sunny conditions and is adaptable to the rocky terrain. The thermal blanket and lightweigh…	inefficient
491	You need to perform first aid on a deep cut and need to create a makeshift bandage during your hike. Tools available: a sock, a small towel, a sanitary pad, a scarf, a clean cloth, an extra t-shirt, a snack bar, a hat, a ziplock bag, a water bottle, and duct tape. However, the sanitary pad is not new and has been unwrapped and exposed to dirt. How do you now create a makeshift bandage using only …	Yes	unconventional	Step1: Clean the wound with the water from the water bottle. Step2: Fold the clean cloth or small towel and place it over the wound. Step3: Use the extra t-shirt or scarf as a wrap around the wound and cloth. Step4: Secure the makeshift bandage with the duct tape to keep it from slipping or coming off.	inefficient
493	Your inflatable camping mattress has deflated during a cold night, and you need to create an improvised sleeping pad. Tools available: a small foam pad, a thin yoga mat, a raincoat, a pair of hiking boots, a down jacket, bubble wrap, a cooler, a large dry towel, a sleeping bag, and a large blanket. However, the yoga mat has been torn in half and some of the bubble wrap has already been popped. Ho…	Yes	unconventional	Step1: Lay the foam pad as the base layer.<br> Step2: Place the two pieces of the yoga mat on top of the foam pad.<br> Step3: Cover the yoga mat with the large blanket.<br> Step4: Roll the down jacket into a makeshift pillow and place it at one end.<br> Step5: Place the bubble wrap and the towel on the sections where your hips and shoulders would rest for extra padding.<br> Step6: Use the cooler …	efficient
494	You need to hang a heavy frame but don't have a leveler tool. Tools available: some strings, nails, a ruler, a glass of water, a stapler, a tape, a book, a hammer, a picture, and a paper clip. Unfortunately, the glass is not flat-bottomed but rounded. How will you hang the frame correctly using these items?	Yes	unconventional	Step1: Measure the frame's width using the ruler, marking the middle.<br> Step2: Measure and mark the middle of the wall section with the ruler where you want to hang the frame.<br> Step3: Hammer a nail into the wall mark using the hammer.<br> Step4: Hang the frame on the nail through the middle mark.<br> Step5: Place the book on top of the frame.<br> Step6: Carefully pour water from the glass on…	inefficient
495	You are trying to fix your shelf book but all the screwdrivers are missing. Tools available: a paperclip, a coin, a comb, a useful thick glove, a reading glass, an old pen, a fork, a notepad, a butter knife, and a bobby pin. However, the screw’s groove where the screwdriver fits is very small, so neither the coin nor the butter knife fits. How can you use these tools to fix the shelf?	Yes	unconventional	Step1: Straighten out the paperclip using your hands and the thick glove for protection.<br> Step2: Using the old pen, apply pressure to create a small groove on one end of the straightened paperclip that would fit into the screw's groove.<br> Step3: Insert the end of the paperclip with the groove into the screw's groove and turn it to tighten the screw, completing the fix.	inefficient
496	You need to make your room dark for a projector presentation in the afternoon, but your blackout curtains are torn. Tools available to you: duct tape, a desk lamp, a stapler, dark bed sheets, a coat hanger, clothespins, a fan, black garbage bags. However, the windows are tall and wide, exceeding the size of the garbage bags and bed sheets. How can you darken the room using these items?	Yes	unconventional	Step1: Use the duct tape to secure the dark bed sheets over the windows, making sure to cover as much of the windows as possible.<br> Step2: Use the black garbage bags to cover the remaining uncovered parts of the windows, securing them in place with more duct tape. <br> Step3: Use clothespins or staples if needed to secure the sheets and bags to the window trim or each other. <br> Step4: Turn of…	infeasible
497	You want to freshen up your room, but there is no available air freshener. Tools available: a clean sock, a disposable cup, a notebook, lemon, an old spray bottle and essential oil, a spoon, baking soda, and a plant. However, the sprayer of the old spray bottle is broken and doesn't work. How do you create a homemade air freshener using these tools?	Yes	unconventional	Step1: Cut the lemon into pieces with the spoon. Step2: Put the lemon pieces and a few drops of essential oil into the disposable cup. Step3: Sprinkle in some baking soda to neutralize odors. Step4: Tear out a page from the notebook and form a funnel. Step5: Use the funnel to pour the mixture into the old spray bottle. Step6: Soak the sock with the mixture from the spray bottle. Step7: Hang the s…	inefficient
498	Your desk lamp bulb has burned out and you have a presentation to prepare. Tools available: a calculator, a reflective aluminum foil, a stapler, a pencil, a headlamp, a mirror, an eraser, a phone flashlight, and a candle. However, the headlamp only has a red light mode, which isn't suitable for reading. How will you illuminate the room using these items?	Yes	unconventional	Step1: Light the candle to provide a source of light. <br> Step2: Use the phone flashlight facing upwards to disperse light. <br> Step3: Reflect additional light into the room with the aluminum foil and mirror, directing the reflected light to where you need it most. <br> Step4: If more light is needed, consider using the red light from the headlamp for additional ambient light.	inefficient
499	You spilled coffee on your white rug and want to clean it quickly, but your vacuum cleaner is broken. Tools available: dish soap, a duster, salt, a hairdryer, a white cloth, a sponge, a broom, a paper towel roll, an old toothbrush, and white vinegar. However, the rug is very thick and absorbent, making it harder to clean using the aforementioned method. How could you clean the stained rug using t…	Yes	conventional	Step1: Blot the stain with paper towels to absorb as much coffee as possible.<br> Step2: Mix one tablespoon of dish soap, one tablespoon of white vinegar, and two cups of warm water. <br> Step3: Using a sponge, apply this solution to the stain, gently working it into the fibers. <br> Step4: Rinse the sponge with clean water, squeeze out excess water, and blot the area again to remove soap mixture…	inefficient
500	You have to participate in an online meeting, but your room is too noisy because of the construction outside. Tools available: a small fan for white noise, an alarm clock, a bookshelf, a desk lamp, noise cancellation headphones, a closet, a yoga mat, blankets, and pillows. However, the noise cancellation headphones have low battery and there is no power outlet in the closet. How will you attend t…	Yes	unconventional	Step1: Close all windows and doors to minimize noise entry.<br> Step2: Put on the noise cancellation headphones to actively diminish the construction sounds.<br> Step3: Turn on the small fan to create some background white noise that can further help mask the construction noises.<br> Step4: If needed, build a makeshift sound barrier using the blankets and pillows around your workspace. This can h…	efficient
501	Your kitchen sink is leaking and you don't have a wrench. Tools available: a plastic putty knife, duct tape, a bottle of dish soap, rubber bands, a large zip-tie, and a pair of rubber gloves. The hole in the sink pipe is too large for just duct tape or a zip-tie to adequately cover. How can you stop the leakage using these items?	Yes	unconventional	Step1: Put on the rubber gloves.<br> Step2: Cut a piece of duct tape large enough to cover the hole.<br> Step3: Create a strong seal by applying soap on the affected pipe area.<br> Step4: Secure the duct tape over the soap-applied hole.<br> Step5: Fasten tightly using rubber bands. <br> Step6: For further security, tie the zip-tie around the rubber bands and the taped area.	infeasible
502	You want to create a centrepiece for your dining table but have no decorative items. Tools available: a glass bowl, a few candles, a piece of driftwood, some pebbles, a scarf, and a stack of old magazines. The old magazines are too fragile to be stacked and the candles are too large to fit in the glass bowl. How do you make a centrepiece using only these items?	Yes	unconventional	Step 1: Arrange the pebbles in the glass bowl.<br> Step 2: Surround the base of the candles with these pebbles so they’re stable.<br> Step 3: Position the driftwood next to the candles.<br> Step 4: Use the scarf to gently wrap around the centrepiece, offering colour if the scarf is patterned or bright.<br> Step 5: Finally, strategically rip out colourful or interesting pages from the magazines an…	infeasible
504	An old photo album has pages that are stuck together. You do not have the correct conservation tools. Available: a can of air duster, a sheet of wax paper, a pair of tweezers, a clean paintbrush, an iron, and a hairdryer. The paper is exceptionally old and fragile, making the application of heat potentially damaging. How do you unstick the pages without damaging them?	Yes	conventional	Step 1: Gently insert the tweezers into the edge of the stuck pages, creating a small opening.<br> Step 2: Put a piece of wax paper in this opening, and slide it carefully between the stuck pages, using the tweezers for assistance.<br> Step 3: Use the canned air duster to blow air into the opening, facilitating the wax paper's movement.<br> Step 4: Slowly pull the wax paper out using the tweezers…	inefficient
505	After moving into a new house, you realize that the previous owner smoked and there is a lingering smoke smell. Available: fans, a bag of charcoal, baking soda, vinegar, a spray bottle, and fresh coffee grounds. The house doesn’t have any carpets or upholstery. How do you get rid of the smell using only these items?	Yes	conventional	Step1: Open all windows to improve ventilation and place fans to circulate air. Step2: Pour baking soda and charcoal into separate bowls and distribute them throughout the house to absorb the odor. Step3: Make a 1:1 solution of vinegar and water in the spray bottle and mist onto walls and floors. Step4: Scatter fresh coffee grounds around the house, they will also help to neutralize the smell. Dr…	efficient
506	Your apartment smells musty after being shut throughout winter. Available: an old pair of pantyhose, a crockpot, a bottle of essential oil, a box of dryer sheets, baking soda, and a bunch of fresh lemons. The crockpot is too small to create a noticeable change in the room. How do you use these items to freshen up your space?	Yes	unconventional	Step1: Cut lemons in half and scrub all surfaces with them to naturally disinfect and freshen.<br> Step2: Fill old pantyhose with baking soda, tie off, and place in various locations to absorb odor.<br> Step3: Dampen dryer sheets and tape them over any vents in the apartment to spread their fragrance when heat or air is on.<br> Step4: Put a few drops of essential oil on light bulbs. When they're …	infeasible
509	Your living room looks plain and you want to add a piece of artwork, but you don't have any. Available items are: a set of highlighter pens, an old frame, a ball of string, colored paper, a box of thumbtacks, and a mirror. The mirror is too heavy to hang up. How do you create a piece of art for your wall using these items?	Yes	conventional	Step1, draw an abstract design or image on the colored paper using highlighters. Step2, cut out the design and place it in the frame. Step3, use thumbtacks to hang the frame on the wall. Step4, cut several pieces of string and use thumbtacks to hang them from the bottom of the frame, creating a hanging element. You can also attach cut-outs from the colored paper to the string.	infeasible
510	You need to study for a geometry test but do not have a protractor or compass. Tools available: a notebook, a pencil, a ruler, a few drawing pins, a scissor, and a string. The string is too thick and short, making the circle too small and not precise. How do you draw a circle and measure angles using these items?	Yes	conventional	Step1: Use a pencil and ruler to draw a straight line which will be the diameter of the circle.<br> Step2: Find the midpoint of this line to be the center of the circle.<br> Step3: Put the drawing pin in the center point, tie the string to it and pencil on the other end.<br> Step4: Use the string to guide the pencil in drawing a circle.<br> Step5: Without a protractor, eyeball the meeting angle b…	inefficient
451	You just baked cookies, but your oven mitts and tongs are nowhere to be found, and the baking sheet is still too hot to touch. Armed with a magazine, a silicone baking mat, a dish towel, a hot water bottle, and a plastic cutting board you need to come up with a solution. However, the dish towel is wet. How would you go about removing the hot baking sheet from the oven?	Yes	unconventional	Step1: Open the oven using the corner of the magazine to protect your fingers from the heat. Step2: Slide the silicone baking mat under the baking sheet. Step3: Using the edge of the plastic cutting board, push the silicone baking mat with the baking sheet on top out of the oven. Step4: Let the baking sheet cool before touching it with your bare hands. The silicone mat will serve as a barrier bet…	infeasible
452	Misplacing your spatula makes flipping pancakes a challenge. Using a soup ladle, a wooden spoon, a turkey baster, a steak knife, or a disposable plastic spoon may be your solution, albeit the wooden spoon has a short handle and the soup ladle isn't flat. How would you manage to flip the pancakes?	Yes	unconventional	Step1: Use the steak knife to gently loosen the edges of the pancake.<br> Step2: Position the ladle under the pancake and the wooden spoon on top.<br> Step3: With a quick and coordinated movement, flip the pancake using both utensils as a sort of makeshift spatula.	efficient
453	The proper kitchen tools for removing skin from a cooked chicken are missing. You do have a set of salad forks, a soft silicone spatula, a slotted spoon, a pair of chopsticks, an ice cream scoop, and a butter knife at hand. However, the salad forks are small and the butter knife is blunt. How would you remove the skin?	Yes	unconventional	Step1: Use the chopsticks to steady the chicken, like you would when carving with a knife and fork. <br> Step2: Smoothly and gently wiggle the blunt butter knife under the skin to detach it from the meat. <br> Step3: Use the chopsticks to grip and pull the skin off bit by bit. If the skin is too warm or slippery, wrap the chopsticks with the spatula to create a heat-resistant and non-slip puller.	inefficient
454	Without a potato peeler, peeling potatoes could be a rough task. However, you do have a cheese cutter, a spoon, a corkscrew, a small fork, and a butter knife handy. The issue is that the butter knife is not sharp enough and the potatoes are unusually hard. How would you tackle peeling the potatoes?	Yes	unconventional	Step1: Using the cheese cutter, make shallow slices into the potato skin following the contour of the potato.<br> Step2: Once the slices are made, use the edge of the spoon to get under and remove the skin pieces, using the indentations from the cheese cutter as a guide. The corkscrew, small fork, or butter knife can be used for harder-to-reach areas or to remove any remaining skin bits.	inefficient
457	Opening a can of food without a functioning can opener becomes a puzzle. The tools available to you are a pair of scissors, a hammer, a fork, a tea towel, a pair of tongs, and a screwdriver. The can is made of a disturbingly robust metal. With only these tools at hand, how would you open the can?	Yes	unconventional	Step1: Place the can on a sturdy surface and cover it with the tea towel to prevent any metal shards from flying.<br> Step2: Position the screwdriver on the edge of the lid, slanting slightly inward.<br> Step3: Use the hammer to strike the end of the screwdriver firmly, making a hole in the can's lid.<br> Step4: Repeat Step3 along the edge of the can lid, creating multiple holes adjacent to each …	efficient
459	Circumstances have left you with the task to peel a large quantity of potatoes. Your regular peeler is broken, but you have a cocktail stick, a pizza cutter, a pair of scissors, a fork, and a butter knife. Regrettably, the scissors are unmanageably blunt. How would you peel the potatoes using only these items?	Yes	conventional	Step1: Insert the fork into the potato to hold it steady. Step2: Carefully use the butter knife to peel away the skin of the potato. Using the fork to keep your hands away from the blade, move the knife from top to bottom to remove the skin. Repeat for each potato. Proof: Butter knives, although duller than regular knives, are still capable of removing potato skins when used with sufficient contr…	inefficient
460	Your egg separator has broken, and you need to separate the egg whites from the yolks. You have a turkey baster, a spoon, a bowl, a slotted spoon, and a chopstick at your disposal. Unfortunately, the spoon is perforated and the turkey baster is not functioning properly. How do you separate the egg whites from the yolks using only these items?	Yes	conventional	Step1: Crack the egg into the bowl. <br> Step2: Use the chopstick to gently lift the yolk out of the bowl, leaving the egg white behind. Be careful not to break the yolk. <br> Step3: Place the yolk in another container or dispose of it if not needed.	inefficient
461	Your kitchen faucet is leaking, and you need to fix it or find a way to stop the leak before the plumber arrives. Tools available to you include a rubber band, a hammer, a plastic bag, toothpicks, tape, and a small plastic container. However, the tape you have is low-adhesive tape, making it difficult to adhere to the wet and leaking faucet. How do you stop the leak using only these items?	Yes	unconventional	Step1: Wrap the leaking area on the faucet with the plastic bag tightly.<br> Step2: Use the rubber band to secure the plastic bag to the faucet, creating a make-shift seal.<br> Step3: Place the small plastic container underneath the faucet to catch any water that may still leak. <br> Tools: Rubber band, plastic bag, small plastic container.	efficient
463	You need to keep your food warm without using electricity. Tools available to you include a cooler, a thermos, a few books, some aluminum foil, a towel, and a small styrofoam cooler. The challenge here lies in the fact that the food is in a large, flat dish that cannot fit into the styrofoam cooler. How do you keep the food warm using only these items?	Yes	conventional	Step1: Wrap the dish with aluminum foil to help retain the heat.<br> Step2: Place the wrapped dish inside the larger cooler. <br> Step3: Use the towel(s) to fill any extra space inside the cooler to provide additional insulation.<br> Step4: Place the cooler on top of the books to elevate it and reduce heat loss through the bottom.<br> Step5: Place the Styrofoam cooler as a lid on top of the large…	inefficient
465	You want to make a smoothie, but your blender is broken. Tools available to you include a measuring cup, a rolling pin, a mesh strainer, a muddler, a whisk, and a tea towel. The catch is that the fruits meant for the smoothie are frozen and thereby too hard for the mortar and pestle to crush. How do you make the smoothie using only these items?	Yes	unconventional	Step1: Wrap the frozen fruits in the tea towel.<br> Step2: Use the rolling pin to crush the fruits while they are still in the towel.<br> Step3: Empty the crushed fruits into the measuring cup.<br> Step4: Add any liquid or additional ingredients into the measuring cup.<br> Step5: Use the muddler to further break down the fruits and mix the ingredients.<br> Step6: To remove any lumps, pour the mix…	inefficient
466	You need to strain pasta, but your colander is missing. Tools available to you include a metal wire cooling rack, a large saucepan lid, a slotted spoon, some tongs, a splatter guard, and a flat baking sheet. The problem is that the pasta you have cooked is tiny like orzo or pastina and therefore falls right through the holes of the slotted spoon and the cooling rack. How do you strain the pasta u…	Yes	unconventional	Step1: Place the splatter guard over the saucepan that contains the cooked pasta.<br> Step2: Hold the saucepan and splatter guard firmly together using the tongs.<br> Step3: Carefully tilt the saucepan so that the pasta water drains out through the small holes of the splatter guard.<br> Tools: Splatter Guard, Saucepan, Tongs.	inefficient
467	You want to make fresh coffee, but your coffee maker is broken. Tools available to you include a wooden spoon, a teapot, coffee filters, some paper clips, a small funnel, and a saucepan. You may find it challenging because the coffee filters you have are too big for the funnel and won't stay in place. How do you make the coffee using only these items?	Yes	conventional	Step1: Fold the coffee filter to a size that will fit the funnel.<br> Step2: Use paper clips to hold the filter in place inside the funnel.<br> Step3: Put the funnel with the filter into the teapot.<br> Step4: Add coffee grounds into the filter.<br> Step5: Heat water in the saucepan until it just starts to boil, then pour it over the coffee grounds in the filter.<br> Step6: Allow the coffee to dr…	efficient
469	You accidentally dropped a glass in your kitchen, and small shards are scattered on the floor. Your vacuum cleaner is out of order. Tools available to you include a lint roller, a wet cloth, a pair of tongs, a sticky tape, and a broom with broken bristles. However, the glass was shattered into extremely fine pieces that are too small to be picked up by the sticky tape. How do you clean up the gla…	Yes	unconventional	Step1: Carefully use the broom with broken bristles to gather all the tiny shards into one location.<br> Step2: Use the pair of tongs to pick up the bigger glass pieces.<br> Step3: Wet the cloth and then dab it on the remaining small glass pieces, which will stick to the wet cloth. <br> Step4: Once all pieces are gathered, wrap them tightly into the cloth and dispose of safely.	infeasible
470	Your microwave is out of order, and you need to reheat leftover food evenly. Tools available to you include a small frying pan, a metal baking sheet, an ovenproof dish with a lid, a stovetop, a saucepan, and a steamer basket. The trick is that the leftovers are a slice of pie, and stirring in a saucepan would destroy its shape. How do you reheat the leftovers using only these items?	Yes	conventional	Step1: Place the slice of pie in the ovenproof dish. <br> Step2: Cover the dish with the lid. <br> Step3: Place the ovenproof dish on the baking sheet. <br> Step4: Reheat the pie on the stovetop. Ensure that heat isn’t too intense as that can burn the crust, a low - medium heat setting is suitable. This method will both preserve the shape of the pie and heat it evenly.	infeasible
471	You need to set up a shelter while camping, but you've forgotten your tent and it's about to rain. Tools available: carabiners, a hammock, uneven hiking poles, bungee cords, a whistle, a knife, a large tarp with multiple small holes, some rope, a sleeping bag, and a map. How do you create a makeshift shelter using only these items under these circumstances?	Yes	unconventional	Step1: Use knife to cut rope into adequate lengths as needed. Step2: Tie one end of each rope piece to carabiners. Step3: Attach carabiners to tarp corners. Step4: Use bungee cords to secure other ends of ropes to trees or hiking poles, positioning tarp as slanted roof above ground. Step5: Adjust ropes and bungee cords to cover holes in tarp. Step6: Place sleeping bag under tarp shelter. Set up h…	inefficient
472	Your hiking boot's shoelace has broken, and you're far from home. Tools available: a compass, a thick paracord, a small safety pin, a flashlight, a compact mirror, a paper clip, a hair tie, a piece of cloth, a granola bar, and a pair of nail clippers. How do you make a temporary shoelace to continue your hike with this set of resources?	Yes	unconventional	Step1: Unravel the paracord. <br> Step2: Cut the length you need for a shoelace using the nail clippers.<br> Step3: Use the safety pin and the hair tie to secure each end of the paracord to prevent fraying. <br> Step4: Lace up your boot with the makeshift paracord shoelace.	inefficient
473	Your backpack's zipper has broken, and you need to keep your belongings secure while traveling. Tools available: a travel towel, a couple of binder clips, duct tape that doesn't stick properly to the backpack material, clothespins, a toothbrush, an umbrella, rubber bands, a hat, a lunchbox, and carabiners. How do you create a makeshift solution to secure your backpack using only these items?	Yes	unconventional	Step1: Secure the zipper area by tightly wrapping the travel towel around it.<br> Step2: Use the binder clips to hold the towel in place, clipping them to the backpack material.<br> Step3: Double secure the wrapping with rubber bands, stretching them around the wrapped towel.<br> Step4: For additional security, attach the carabiners to the binder clips and then clip the carabiners to the backpack…	inefficient
474	You need to cook while camping, but you've forgotten your portable stove. Tools available: a can opener, aluminum foil, a pot or pan, a food package, a metal water bottle, a bucket, a small grill grate, a camping chair, a spoon, and a campfire with a strong breeze. How do you create a makeshift cooking setup using only these items given these conditions?	Yes	unconventional	Step1: Use the bucket to block the breeze from the fire. <br> Step2: Place the small grill grate over the bucket, resting it securely on the sides. <br> Step3: Start the campfire under the grill grate, using the pot or pan to cook items from the food package. <br> Step4: Use the aluminum foil as a lid for the pot or pan to trap heat and cook the food. <br> Step5: Utilize the spoon for stirring or…	inefficient
475	Your flashlight is running out of batteries, and you need an alternative light source to navigate while camping. Tools available: already activated glow sticks, a mirror, a smartphone, a dirty scratched transparent water bottle, a lighter, a tent peg, a small candle, a scarf, a snack bar, and a set of playing cards. How do you create a makeshift light source using only these items?	Yes	conventional	Step1: Light the candle using the lighter, it's going to act as your primary source of light.<br> Step2: Hold the mirror behind the candle (be careful not to burn yourself though!) to maximize the light it gives off.<br> Step3: If you need to move around, carefully carry the candle, making sure the flame isn't too close to anything flammable. <br> All other items are not necessary for creating a …	inefficient
476	You need to purify water, but you don't have a water filter or purification tablets. Tools available: a spatula, a metal bottle, a pot or pan, a camping mug, a compass, a bandana with large holes, a rubber band, a plastic Ziploc bag, a campfire, and an energy bar. How do you purify water using only these items under these circumstances?	Yes	conventional	Step1: Filter water with bandana into the metal bottle, removing large particulates.<br> Step2: Secure the Ziploc bag with the rubber band over the top of the metal bottle, leaving a cavity.<br> Step3: Boil the water in the bottle over the campfire, condensation will collect in the bag.<br> Step4: Once cooled, pour the condensed water into the camping mug for consumption-this is pure water.	infeasible
478	You need a makeshift pillow for sleeping while camping. Tools available: an empty water bottle, a book, a travel towel, a cooking pot, a small inflatable float with a slow leak, a pair of socks, extra clothes, a lantern, and a large dry bag. How do you create a makeshift pillow using only these items?	Yes	unconventional	Step1: Fold the travel towel to create a soft base.<br> Step2: Put your extra clothes into the dry bag making sure it is packed out enough to provide comfort but not too stiff.<br> Step3: Place the folded travel towel over the dry bag. <br> Step4: Slip filled dry bag into the pair of socks for extra padding and to keep everything together.<br> The result serves as a makeshift pillow.	infeasible
480	Your sleeping bag zipper is broken, and you're unable to close it for warmth during a cold night of camping. Tools available: a pair of gloves, a large scarf or blanket, a hat, clothespins, a small sewing kit, a foldable chair, duct tape, a travel mug, safety pins that are too small, and a bungee cord. How do you create a makeshift closure for your sleeping bag using only these items under these …	Yes	unconventional	Step1: Lay your sleeping bag on the flat ground.<br> Step2: Use the clothespins to fasten the two sides of the sleeping bag together as close as possible, starting from your feet going up to your chest. <br> Step3: Secure the upper portion of the sleeping bag with the duct tape by taping the broken zipper sides together.<br> Step4: Wrap the large scarf or blanket around your shoulders and upper b…	efficient
391	Your living room picture hangs crooked, and you don't have a level to ensure it's hanging straight. You have a protractor, a bubble from a bubble wrap, rubber bands, a ruler, a handful of coins, a smartphone with a dead battery, a stapler, an umbrella, a ping pong ball, and a sheet of paper. How do you hang the picture correctly?	Yes	unconventional	Step1: Attach rubber band across back of picture frame to create straight edge.<br> Step2: Use ruler and protractor to ensure rubber band is at 90 degrees to side of frame.<br> Step3: Hold picture against wall with rubber band horizontal.<br> Step4: Mark wall above each end of rubber band.<br> Step5: Align picture with marks and hang it. Tools: Protractor, ruler, rubber band.	inefficient
392	A screw has fallen out of your living room wall clock, and it's now loose and wobbling. You have a disposable plastic knife, a pair of chopsticks, tweezers, a broken pen, a banana, a credit card, a door stopper, a toothpick, a paper clip, and a stripped screw head. How do you secure the wall clock back in place?	Yes	unconventional	Step1: Use tweezers to grab, align, and hold the loose screw.<br> Step2: Unfold the paperclip to use its pointy end as a makeshift screwdriver.<br> Step3: While holding the screw in place with the tweezers, use the paperclip to tighten the screw into the wall, securing the clock back in place.	infeasible
394	A spider has built a massive web in the corner of your living room, and it's too high up to reach on foot. You have a can of hairspray, a feather duster, a stepladder, a broken back scratcher, an extension cord, a yoga strap, a bottle of baby oil, a magazine, a broom handle, and a loose net tennis racket. How do you get rid of the spider web?	Yes	conventional	Step1: Expand the stepladder near the spiderweb and climb up safely.<br> Step2: Attach the loose net tennis racket to the end of the broom handle firmly.<br> Step3: Using the extended broom handle with the tennis racket, reach the spiderweb to carefully remove it.	infeasible
396	The living room floor is covered in small items, like aluminum buttons, coins, and paperclips. Picking them up by hand would be time-consuming. You have a vacuum cleaner without a hose, a pool skimmer, a magnet, a rake, a broom without bristles, a squeegee, a roll of tape, a large syringe, a small paint roller, and a broom with bristles. How do you pick up all the small items quickly and efficien…	Yes	conventional	Step1: Use the magnet to pick up metallic items like aluminum buttons, coins, and paperclips by moving it around the room.<br> Step2: For remaining small items, unfold the pool skimmer and sweep them into a pile, then collect them by curling the roll of tape onto your hand, sticky side out and then tap the pile.<br> Step3: For leftovers, if any, use the broom with bristles for the final cleanup.	infeasible
398	There is a tiny spider on the ceiling of your bedroom, in the corner where the slope of the ceiling and the wall meet. You want to remove it without hurting it. Tools available: a handheld fan, a glass of water, a wrist fitness band, a roll of toilet paper, a frisbee, a candlestick, a pair of winter gloves, old Halloween costumes, a throw pillow, and a selfie stick. How can you safely remove the …	Yes	unconventional	Step1: Put on the pair of winter gloves for protection. <br> Step2: Extend the selfie stick to reach the corner of the ceiling where the spider is.<br> Step3: Wrap a small piece of toilet paper around the end of the selfie stick and gently coax the spider to climb onto it.<br> Step4: Slowly lower the selfie stick to safely transport the spider outside.	infeasible
399	Your bedroom door is locked, and you can't find the key to unlock it from inside. Tools available: a newspaper, a drinking straw, a coat hanger, a piece of chewing gum, a roll of tape, a compass, a bottle of nail polish, a pair of headphones, an old magazine, and few plastic-coated paper clips. How can you unlock the door and get out?	Yes	unconventional	Step1: Straighten the coat hanger. <br> Step2: Bend one end of it into a small hook. <br> Step3: Insert the hooked end into the keyhole and maneuver it around to mimic the action of a key, thereby unlocking the door. If the lock is too complex for this, it may not be possible to unlock the door with the items available.	inefficient
400	Your blanket is trapped between the bed and the wall. The space between the bed and wall is too narrow for a regular item to reach through. Tools available: a book, a selfie stick, a rubber spatula, a clothes hanger, a pair of disposable gloves, a photograph album, a hairbrush, a soccer ball, a yoga mat, and a jigsaw puzzle. How can you retrieve the blanket without moving the bed?	Yes	unconventional	Step1: Attach the rubber spatula to the end of the selfie stick using the disposable gloves to secure it tightly (like tape).<br> Step2: Use this improvised device to reach between the bed and the wall to scoop or hook the blanket out.	inefficient
402	Your phone is stuck under the bed, and it's out of your arm's reach. Tools available: a set of measuring spoons, a toy airplane, a box of straws, a pair of binoculars, a neck pillow, and a shower cap. The catch is, the straws are bendy straws which effortlessly bend and lose their shape so can't be used as a solid shaft. How can you retrieve your phone without shifting the bed?	Yes	unconventional	Step1: Connect several straws together to make a long stick.<br> Step2: Use the handle of the measuring spoons to secure the bendy part of the bottom straw, making it rigid.<br> Step3: Use the rigid straw stick to reach under the bed and push the phone within your reach. <br> Tools used: straws, measuring spoons.	infeasible
403	There's a squeaky doorknob in your bedroom that needs fixing, and you don't have lubricant. Tools available: a toothbrush, a roll of duct tape, a package of birthday candles, a plush toy, a can of shaving cream, and a container of olive oil. The olive oil container, unfortunately, is almost depleted, and the remaining oil isn't sufficient to act as the lubricant. How can you resolve the irritatin…	Yes	conventional	Step1: Warm a birthday candle slightly to make it pliable but not liquid. <br> Step2: Rub the warmed candle on the toothbrush bristles.<br> Step3: Use the toothbrush to apply the candle wax onto the squeaky doorknob and its surrounding fixture. The wax acts as lubrication. <br> Step4: If necessary, use duct tape to clean any excess wax that drips or spreads elsewhere.	inefficient
404	Your bedroom window is stuck shut, preventing you from letting in fresh air. Tools available: an empty gift box, a stack of old letters, a pair of gardening gloves, a wooden ruler, a can opener, and a water bottle. The issue though, is the window is obstructed due to excess paint which means a ruler wouldn't suffice to create a gap or leverage to open it. How can you get the window unstuck and op…	Yes	unconventional	Step1: Put on the gardening gloves to protect your hands. <br> Step2: Use the can opener's sharp edge to gently scrape away the excess paint around the window edges. <br> Step3: After removing as much paint as possible, try to gently pry open the window using the gripping end of the can opener for additional leverage while wearing the gloves for safety.	infeasible
405	Your dresser drawer is jammed, inhibiting your ability to get your clothes. Tools available: a pair of crutches, a plant, a pillowcase, a box of crayons, a hair tie, and a bag of cotton balls. However, the DVD case in the mix is made of flexible plastic, rendering it ineffective as a lever or wedge to open the drawer. How can you gain access to your clothes in the drawer using these available ite…	Yes	unconventional	Step1: Use one of the crutches to tap on the drawer from different angles to try loosening the jam. Step2: Then, using the crutch, apply downward pressure on the drawer while gently pulling it open. Step3: If it's still stuck, use the plant to moisten the cotton balls (assuming it's a live plant), and wedge these wet cotton balls into any accessible areas around the drawer to lubricate the edges,…	infeasible
407	An iron is missing, and you have a shirt with a stubborn wrinkle. Tools available: a bottle of lotion, a kitchen pot with a lid, a pair of shoes, a hand towel, a toy ball, and a stack of books. The kitchen pot, though, is made of plastic material, so it can't be heated to drive the wrinkle out of the shirt. How can you rid your shirt of the wrinkle with no iron?	Yes	unconventional	Step1: Dampen the hand towel slightly with water.<br> Step2: Place the damp towel over the wrinkle on the shirt.<br> Step3: Using the bottom of the plastic kitchen pot, press down on the dampened towel (this acts like an iron). The pressure from the pot should help smooth out the wrinkle.<br> Step4: Let the shirt dry. This process is called damp ironing and can be done without heat. Be sure to ap…	infeasible
408	A dark blemish has taken residence on your bedroom's wooden floor, and you lack stain remover. Tools available: a bucket of water, a toothpaste tube, a sponge, lemon juice, a pair of slippers, and a comic book. However, the lemon juice is stored in a squeeze bottle with a fixed cap. How can you thoroughly clean the stain using just these objects?	Yes	unconventional	Step1: Squeeze out some toothpaste on the stain, its abrasive nature will help to remove the stain.<br> Step2: Use the sponge to rub the toothpaste in circular motion over the stain.<br> Step3: Dip the sponge in the bucket of water, squeeze out the excess water and wipe off the toothpaste from the floor. <br> Step4: Repeat until stain completely removed.	inefficient
409	Your bed's sheet keeps sliding off the edges, and you lack sheet straps. Tools available: a set of screwdrivers, a roll of string, a bag of clothespins, a cleaning brush, a jump rope, and a set of plastic food containers. However, the roll of string is too short to stretch fully around the mattress. How can you secure your sheet in position without the use of sheet straps?	Yes	conventional	Step1: Use the jump rope to lengthen the roll of string, tying them together securely with a knot.<br> Step2: Lay the sheet over the mattress and move to the underside of the mattress. <br> Step3: Using the extended string/jump rope, tie it around the underside of the mattress, securing the sheet in place.<br> Step4: Secure the knot and adjust it tight enough so the sheet will not slide off. Tuck…	inefficient
410	Your wooden bed frame sports a conspicuous scratch that you wish to make less obvious. Tools available: a purse, a drinking glass, a post-it pad, a tube of clear glue, a bag of rubber bands, and a tube of lip balm. Unfortunately, the clear glue tube is dried up and can’t be used. How can you make the scratch less apparent using only these items?	Yes	unconventional	Step1: Rub the lip balm over the scratch. The wax in the lip balm will fill in the scratch, reducing its visibility.<br> Step2: Rub a rubber band over the balm-filled scratch to blend the balm into the wood and further disguise the scratch.	inefficient
411	You need to transplant a small seedling, but your gardening trowel is missing. Available tools include an old toothbrush, a short and thin screwdriver, a very small spoon, a wooden ruler, and a glossy paged magazine. The soil is heavy clay. How can you transplant the seedling using only these items?	Yes	unconventional	Step1: Use the screwdriver to loosen the clay around the seedling carefully.<br> Step2: Gently grip the seedling near its base using the pages of the glossy magazine (which can be folded for better grip and to protect its delicate surface) and lift it out.<br> Step3: Insert the screwdriver into the new location to create a hole.<br> Step4: Using the small spoon, scoop up enough soil to fill the h…	inefficient
412	Your watering can has gone missing, and your garden plants need to be watered. Tools available to you include a drinking straw, a teapot, a ladle with a short handle, a heavy bucket filled with water, and a colander. How can you water the garden using these items?	Yes	unconventional	Step1: Use the ladle to scoop water out of the heavy bucket. Step2: Use the ladle to pour water into the teapot until it's filled. Step3: Use the teapot to water the plants. You may have to repeat these steps multiple times depending on the size of your garden. The colander and the drinking straw are not required.	inefficient
413	You need to tie up a climbing plant to a support, but your gardening twine has run out. Items available include a rubber band, a paperclip, a short twist tie from a bread bag, and a thin and slippery shoelace. Your climbing plant has thick stems. How can you secure the climbing plant using only these items?	Yes	unconventional	Step1: Untangle the shoelace and double it for extra strength.<br> Step2: Use the paperclip to thread the shoelace through the spaces between the stems.<br> Step3: Pull both ends of the shoelace to make it secure around the stems.<br> Step4: Tie the shoelace tightly around the plant, ensuring it's secure, but not so tight as to damage it.<br> Step5: Hold the knot firmly and use the twist tie to s…	inefficient
414	Your garden needs to be weeded, but your weeding tool is broken. Tools available to you include an ice scraper that is too dull, a kitchen fork with tines that are too close together, a hairbrush, and a pair of kitchen tongs. The weeds are embedded in compact soil. How can you weed the garden with these items?	Yes	unconventional	Step1: Use the dull ice scraper to loosen the compacted soil around the weeds. <br> Step2: Once loose, employ the kitchen tongs to grasp the weed at its base, squeezing tightly to ensure you also remove the roots. Repeat until all the weeds are removed.	inefficient
415	A potted plant in your garden has become root-bound, but you don't have a suitable larger pot to transfer it to. Items available include a lunch bag, a wooden ruler that is too thick to pierce through plastic, a wicker basket, a transparent plastic storage container, and an ice bucket. The plant requires good drainage to grow. How can you repot the plant using only these items?	Yes	unconventional	Step1: Use the ruler to poke several holes in the bottom of the lunch bag for drainage. <br> Step2: Fill the lunch bag halfway with soil from the old pot.<br> Step3: Carefully transfer the root-bound plant to the lunch bag and add more soil around its roots.<br> Step4: Place the lunch bag with the plant in the wicker basket for support.<br> Step5: Situate the wicker basket inside the ice bucket t…	infeasible
416	Your outdoor hanging plants need to be deadheaded, but your snips have gone dull. Items available to you include a small nail clipper, a letter opener, a key, a pair of blunt scissors, and tweezers. The dead flowers have sturdy stems. How can you deadhead your plants using these items?	Yes	unconventional	Step1: Use the key to sharpen the blunt scissors by dragging one of its blades against the key edge several times. <br> Step2: Use the now sharpened scissors to snip off the dead flowers from your hanging plants.	infeasible
417	Your garden soil needs to be loosened up, but your garden fork is broken. Tools available to you include a large and difficult-to-maneuver snow shovel, a wooden spatula, a rake with bent teeth, and an old broomstick. Your garden beds are tightly packed. How can you loosen up the soil with these tools?	Yes	unconventional	Step1: Use the wooden spatula to begin loosening the soil in smaller, manageable sections. <br> Step2: Once the soil is partially loose, use the rake with bent teeth to continue the process and break up larger clumps of soil.<br> Step3: Use the broomstick as a makeshift soil aerator by poking holes into loosened soil to enhance aeration. While these tools aren't ideal, they can provide a temporar…	inefficient
418	You need to create a barrier to prevent pests from entering your garden, but you don't have any fencing materials or mesh. Items available include non water-resistant cardboard boxes, a beach towel, very thin old newspapers, and a yoga mat. Your garden gets frequent rain. How can you create a makeshift barrier with these items?	Yes	unconventional	Step1: Lay down the beach towel and yoga mat, overlapping slightly, around the outside of the garden to act as a barrier.<br> Step2: Fold non water-resistant cardboard boxes and old newspapers into a stack to make them stiff. Place them against the towel and yoga mat to reinforce the barrier. However, given the frequent rain, this arrangement may not be effective for a long time due to the suscep…	inefficient
419	A storm has left a branch hanging precariously above your garden, but you don't have a tree saw to remove it safely. Items available include a bicycle chain, a frayed old fishing line, a piece of rope with a limit on its weight capacity, and a weak wire coat hanger. The branch is heavy and needs careful handling. How can you safely take down the branch with these items?	Yes	unconventional	Step1: Use the bicycle chain to create a lasso around the branch. <br> Step2: Attach the other end of the chain to the rope. <br> Step3: Pull the rope gently to bring down the branch carefully and in control. <br> The weak wire coat hanger and frayed fishing line are unlikely to be helpful in this case as their strength is unreliable.	inefficient
420	Your cherished flower bed needs to be mulched, but you don't have any fresh mulch on hand. Available materials include old wine corks, heavily inked shredded paper, a pile of crushed eggshells, and dried autumn leaves that crumble easily. Your flower bed needs a protective layer to preserve its health and beauty. How can you create a protective layer of mulch with these items?	Yes	conventional	Step1: Start by shredding the dried autumn leaves using a lawnmower. <br> Step2: Mix the shredded leaves, crushed eggshells and shredded paper using a rake or your hands.<br> Step3: Evenly spread this mixture in your flower bed.<br> Step4: Randomly distribute the old wine corks for additional insulation and decorative effect. <br> Required Tools: Lawnmower and a rake/hands.	infeasible
301	You need to staple a stack of papers together, but your stapler is out of staples, and you don't have any paperclips or binder clips. You have a pencil, a roll of masking tape, a hammer, a box of rubber bands, a ruler, a pen, and scissors, but the tape has lost its stickiness and the scissors are too blunt to cut. How can you securely fasten the papers together?	Yes	conventional	Step1: Take a rubber band from the box.<br> Step2: Fold the stack of papers together at one corner.<br> Step3: Use the rubber band to bind around the folded corner. <br> Step4: Loop the rubber band tight enough so the stack of papers remain secure.	inefficient
302	You need to leave an urgent note for your coworker, but you can't find any sticky notes or tape. You have a sheet of paper, a ruler, a bottle of glue, a packet of business cards, a pencil, an eraser, a paperclip, and a highlighter, but the paperclip is bent and the pencil is dull. How can you make sure your coworker sees the note on their desk?	Yes	conventional	Step1: Using the pencil, write down the urgent message on the sheet of paper.<br> Step2: Highlight the urgent message with the highlighter to make it stand out. <br> Step3: Use the ruler to draw a rectangle around the urgent message to further emphasize it.<br> Step4: Apply the glue to the back of the sheet of paper.<br> Step5: Stick the paper on your coworker's desk where it will be easily notic…	inefficient
303	Your printer is jammed, and the only tool you have is a pair of tweezers. You have a marker, a roll of sticky tape, a flashlight, and an old magazine, but the paper is lodged too deep for the tweezers to reach. How can you dislodge the stuck paper without damaging the printer or the paper?	Yes	conventional	Step1: Use the flashlight to locate the jammed paper.<br> Step2: Carefully unroll the sticky tape and attach it to the end of an unneeded page in the magazine.<br> Step3: Push the taped end of the magazine page into the printer along the jammed paper's path.<br> Step4: Press the tape against the jammed paper so that it sticks.<br> Step5: Gently pull the magazine page out, hopefully bringing the s…	inefficient
304	You need to pour hot water into a coffee mug from an electric kettle, but the kettle's handle is broken. You have a rubber band, a piece of string, a plate, a tissue box, a pair of scissors, a coat hanger, and a pen, but the scissors are too blunt to cut the box and the pen is out of ink. How can you pour the water into the mug safely?	Yes	unconventional	Step1: Bend the coat hanger into a hook shape to grab the kettle's spout.<br> Step2: Use the rubber band and string to secure the coat hanger hook to the kettle's spout for more balance while pouring.<br> Step3: Holding the other end of the coat hanger, pour the hot water carefully into the mug placed on the plate (to catch potential spills).	infeasible
305	Your office plant needs watering, but you don't have a watering can. You have a pack of sticky notes, a sealing wax, a phone charger, a stapler, a box of thumbtacks, a cup, and a hole punch, but your hole punch is jammed and the stapler is too large to make holes in the cup. How can you water the plant?	Yes	conventional	Step1: Take the cup and fill it with water.<br> Step2: Carefully pour the water from the cup onto the soil of the office plant.	efficient
306	You need to take notes during an important meeting, but your pen has run out of ink. You have a pencil sharpener, a box of colored pens, a pair of scissors, a stapler, a binder clip, a pencil, and a highlighter, but the tip is broken and the pencil is too soft while your stapler is too blunt to sharpen it. How can you make the pencil work for the meeting?	Yes	conventional	Step1: Use the pair of scissors to carefully cut or shave off the broken, blunt tip of the pencil to expose the graphite.<br> Step2: If needed, continue using the scissors to whittle the pencil until the tip is sharp enough for use.<br> Tools used: A pair of scissors and a pencil.	inefficient
310	Your office chair is too low, and the height adjustment lever is broken. You have a pack of marker pens, a laptop stand, a box of paper clips, a roll of duct tape, a stapler, a stack of books, and a pillow, but the books are too large for the chair and the duct tape has lost its stickiness. How can you make your chair more comfortable and ergonomic?	Yes	unconventional	Step1: Place the laptop stand on the chair seat.<br> Step2: Cover the stand with the pillow for comfort.<br> Step3: Stabilize and secure the pillow onto the stand using the paper clips or the stapler if necessary.<br> Step4: The chair height is now adjustable by modifying the stack of books under the laptop stand.	infeasible
311	The whiteboard markers in your office have dried out and need to be replaced, but new markers won't arrive until tomorrow. You have water, a box of colored pencils, and a sponge. However, all the colored pencils have been whittled down to nubs, too short to comfortably write with, and the sponge is already saturated with old, dried ink. How can you write on the whiteboard for today's presentation?	Yes	conventional	Step1: Get a pair of pliers or something that can function as a holder for the colored pencil nubs, hold onto each pencil while writing on the whiteboard. <br> Step2: Use a damp cloth or the wet sponge to erase any mistakes or after the presentation. <br> You need: colored pencil nubs, pliers or pencil holder, and damp cloth or wet sponge.	infeasible
312	Your laptop is overheating, and you don't have a cooling pad or a fan. You have a ruler, a stack of paper, and a pair of scissors. But, the stack of paper is made of thermal paper, which is fragile and reacts to heat, changing color. Also, the scissors are blunt, making them inefficient for cutting. How can you create a makeshift cooling system for your laptop?	Yes	unconventional	Step1: Use the scissors to cut the thermal paper into pieces, they don't have to be perfect. <br> Step2: With those pieces, form a thick stack that's taller than the ruler.<br> Step3: Place the laptop on the stack of thermal paper.<br> Step4: Slide the ruler under the laptop, resting on top of the paper stack. Now, there is an elevated space underneath the laptop to improve air circulation, thus …	inefficient
313	You need to organize a stack of loose documents, but you don't have any folders or binder clips. You have a box of paperclips, a rubber band, and a hole punch. The hole punch is broken, the paperclips are excessively large, and the rubber band is too small and fragile to hold a large stack of papers. How can you keep the documents organized?	Yes	conventional	Step1: Divide the papers into smaller stacks that can be held by the rubber band without breaking. <br> Step2: Use the big paperclips to clip together the smaller stacks. <br> In this way, even if you don't have proper files or binder clips, you can organize your documents effectively using large paperclips and a fragile rubber band.	infeasible
314	The office door keeps slamming shut on its own, and you don't have a door stopper. You have a roll of adhesive tape, a book, and a stapler. But, the book is a priceless antique and cannot be used as a door stopper. Also, the stapler is a mini size and the adhesive tape is not strong enough to hold the door. How can you keep the door from slamming?	Yes	unconventional	Step1: Open the door to the desired position. <br> Step2: Fold a length of adhesive tape with the sticky side outwards. <br> Step3: Attach this piece of tape to the bottom of the mini stapler. <br> Step4: Use the stapler as a temporary door stopper by placing it on the ground and sticking it firmly in place using the adhesive tape. This creates a barrier that keeps the door from slamming.	infeasible
316	You need to transport a large box of office stationery from the storage room to your desk, which is located on a different floor. The available tools are a water cooler bottle, a stack of printer paper, a fire extinguisher, a large CPU from an outdated computer, a hole punch, a long Ethernet cable, a stapler, and a vacant office chair. The office chair is old and unstable, not able to hold too mu…	Yes	unconventional	Step1: Place the box of stationery on the seat of the office chair. <br> Step2: Grab hold of the backrest of the chair for support and start pushing it gently across the floor.<br> Step3: Use the elevator or ramp, if available, to get to the different floor.<br> Step4: Continue to push the chair until you reach your desk. Be cautious to not to put too much force or weight onto the chair to preven…	inefficient
317	Your computer is not getting proper ventilation and overheating due to being placed in a confined area of your cubicle. You can use different items like a tall coffee mug, a picture frame, a ream of printing paper, an empty document file, a desk lamp with dim light, a pile of sticky notes, a thick company manual, and a desk fan which isn't working. But, the ream of printing paper is too thin to p…	Yes	unconventional	Step1: Use the thick company manual and empty document file to elevate the laptop from the backside, facilitating improved airflow. The manual's large size to handle weight and the file's firmness offer stability.<br> Step2: Place the non-working desk fan behind the elevated laptop in a position where it can still aid in circulating air (even if not creating it).<br> Step3: Keep the desk lamp wit…	inefficient
318	You need to prepare a presentation for a meeting but your office's Wi-Fi is down and the only data connection is poor and iffy at your workstation. Available tools include a mobile phone with low battery, a bag of coffee beans, a mini screwdriver set, a print out of an old presentation, a fax machine, a bunch of Ethernet cables that don't connect to Internet, a standing desk, and an instruction m…	Yes	unconventional	Step1: Use the print out of an old presentation as a foundation for your new one. <br> Step2: Handwrite the required changes/additions directly onto the printout, using the structure of the previous presentation as a guide. <br> Step3: Use the mobile phone wisely for any additional important data or images needed, be careful to conserve the battery. <br> Step4: Make coffee with the beans to stay …	inefficient
319	There's a high shelf in your office where some important files you urgently need are kept. Items available are a printer with heavy cartridges, a long ethernet cable, a stack of empty boxes, a laden bookshelf, an office chair without wheels, an empty drawer from a file cabinet, and a flatbed scanner. But the boxes are too weak to hold your weight, and the office chair is wobbly without wheels. Ho…	Yes	unconventional	Step1: Position the office chair without wheels underneath the high shelf. <br> Step2: Place the empty drawer from the file cabinet upside down on the seat of the office chair for added height. <br> Step3: Carefully stand on the drawer and reach for the files on the high shelf. Use the long ethernet cable like a lasso, if needed, to pull the files closer.	infeasible
323	You've got a ton of work to do, but your desk chair is extremely uncomfortable. You have at your disposal a box of markers, a small space heater, a pile of packing foam, a stack of files, a desktop calendar, an old flannel shirt, a mini exercise ball, and rolls of duct tape. Unfortunately, the chair is not stable and leans back uncomfortably. How can you make it comfortable enough to get through …	Yes	unconventional	Step1: Use duct tape to stabilize the chair by wrapping it around the legs to prevent it from leaning back.<br> Step2: Take the pile of packing foam and old flannel shirt to create a cushion. Wrap the foam with the shirt and tape it together.<br> Step3: Place this DIY cushion on the chair and secure it with more duct tape.<br> Step4: For additional comfort and support, you can place the mini exer…	inefficient
324	You need to retrieve a small piece of paper that has slipped into a narrow gap in your desk. You have an unused mousepad, plastic cups, a bottle of whiteout, a set of color pencils, a stapler remover, a long ruler, and a coil of ethernet cable. The problem is, the gap in the desk is curved, and the ruler cannot bend. How can you retrieve the piece of paper?	Yes	unconventional	Step1: Use the stapler remover to gently push the paper towards the opening of the gap. <br> Step2: Form a semi-rigid hook using the ethernet cable, this should be flexible enough to navigate the curve. <br> Step3: Use the cable to hook onto the paper and pull it out of the gap.	inefficient
325	There's an important document stuck in a jammed shredder. You have a broom with a broken handle, a small potted plant, a box of thumbtacks, a pair of safety gloves, a mop with a sponge head, a can of compressed air, and a company mug filled with change. The paper is wet and has become solidly lodged in the shredder. How can you remove the document?	Yes	unconventional	Step1: Put on safety gloves to protect hands. <br> Step2: Unplug the shredder to avoid accidental activation. <br> Step3: Use the broken broom handle to push up against the jammed paper pushing from the bottom of the shredder, ensuring not to push further into the cutters. <br> Step4: If paper is still stuck, spray compressed air into shredder to help loosen paper, being careful to direct air flo…	inefficient
326	You accidentally dropped your earring behind a heavy dresser and you cannot see or reach it. You have a roll of adhesive tape, a comb, a metal hanger, a vacuum cleaner, a ballpoint pen, a glass cup, a pillowcase, and an ice scraper. However, the metal hanger is thick and rigid, so it can't fit into the narrow space behind the dresser. How will you retrieve the earring?	Yes	unconventional	Step1: Attach the adhesive tape to the end of the comb, sticky side out.<br> Step2: Slide the comb behind the dresser, guiding it towards the earring.<br> Step3: Once the comb reaches the earring, press the sticky tape against it to stick the earring to the tape.<br> Step4: Carefully pull the comb back out from behind the dresser, retrieving the earring with it.	inefficient
327	You need to move a heavy wooden wardrobe across the room, but it has no wheels. Available tools include a skateboard, a backpack, a ceramic plate, a yoga mat, two table tennis paddles, and a telescoping selfie stick. Unfortunately, the wardrobe is not empty and is too heavy to be lifted. How can you move the wardrobe without damaging the floor or the wardrobe?	Yes	unconventional	Step1: Clear the skateboard and place it flat on the ground, ensuring enough space for the wardrobe. <br> Step2: Using the selfie stick as leverage, gently tip the wardrobe onto the skateboard.<br> Step3: Push the wardrobe carefully across the room by either pushing the wardrobe itself, if safe to do so, or by pushing the skateboard. <br> This method minimizes risk to the wardrobe and floor and u…	inefficient
328	A spider has spun a intricate web at the ceiling corner in your bedroom, well above your reach. You only have a corkboard, a tape measure, a children's toy block, a portable fan, a lathe, and a plastic shoebox available. The spider web is in an awkward position that isn't directly reachable by the tape measure even with the lathe. How can you remove the spider web without climbing on a ladder?	Yes	unconventional	Step1: Attach the toy block to the end of the tape measure using the provided corkboard's push pins.<br> Step2: Extend the tape measure and aim towards the spider web from a safe distance. <br> Step3: Turn on the portable fan and position it between you and the spider web. The wind force created by the fan will guide the block at the end of the tape measure to hit the spider web. This swirl shoul…	infeasible
329	An old, scratched photo of your family is stuck to the bottom of your nightstand drawer. Available tools include tweezers, a straw, a magazine, rubber gloves, a glass bottle, cotton swabs, an old toothbrush, and dishwashing liquid. However, the drawer is so shallow that you can't get the toothbrush and your hand in at the same time to wet the photo. How do you carefully remove the photo without d…	Yes	unconventional	Step1: Put on rubber gloves for protection. Step2: Use the straw to pour a few drops of dishwashing liquid onto the photo's edges. Step3: Gently work the liquid under the edges with a cotton swab. Step4: Use the tweezers to carefully lift the photo once the liquid has loosened it. Step5: Use the magazine underneath the photo as a makeshift palette for easy lifting.	inefficient
511	You need to record your teacher's lecture for future review but your recording device is not working. Available tools: a pencil sharpener, a friend sitting beside you, a broken earphone, a minimally-charged tablet without functional microphone, a music player, a pen, a notebook filled up with notes from another class, colored markers, and your smartphone with camera but without a recording app. H…	Yes	conventional	Step1: Use your smartphone to film the lecture, use landscape mode to cover more area. <br> Step2: If the lecture is longer than your phone's battery life or storage, intermittently use your tablet to continue filming. <br> Step3: After lecture, transfer the videos to your friend sitting beside you for backup. Also, save all videos immediately to a cloud storage if possible.<br> Step4: Use the pe…	infeasible
515	You need to check your calculations but you don't have a calculator. Available tools: a ruler, a pile of dominos, unsharpened chalk, a toy abacus, a deck of cards, a damp piece of scratch paper that smudges everything written on it, a pencil without lead, a set of dice, and loose staples. Despite the condition of the paper and pencil, how do you check your math homework using these tools?	Yes	unconventional	Step1: Use the toy abacus to perform the calculations by moving the beads along the rods to represent numbers. <br> Step2: Cross-check these results with calculations using dominos where each domino can represent a certain numeric value. <br> Step3: If necessary, use the deck of cards, where each numbered card can represent a numeric value, for additional verification.	inefficient
516	You need to present a history timeline, but have no poster board. Available tools: an array of broken crayons, a long stretch of butcher paper, a bag of cotton balls, scissors with dull blades, glue, a stack of aluminum foil, a box of paper clips, dried-out markers, old magazines, and empty water bottles. How can you create a timeline despite the condition of the markers and scissors?	Yes	unconventional	Step1: Roll out the butcher paper.<br> Step2: With dull scissors, cut out dates or periods from magazines and glue them onto the paper.<br> Step3: Use the array of broken crayons to draw a line connecting these periods or dates.<br> Step4: Add contextual details beneath each time period with broken crayons.<br> Step5: Cut aluminum foil into shapes representing key events and glue these onto relev…	infeasible
517	You need to memorize a poem for your literature class, but have trouble remembering it. Available tools: an uncharged digital clock, a thread ball, a small whiteboard with a marker, sticky notes already filled with other reminders, a timer, a collection of stickers, a pile of old flash cards, a mirror, a run-out highlighter, and a copy of the poem. How do you overcome the memory challenge and mem…	Yes	conventional	Step1: Break the poem down into manageable parts on the whiteboard with the marker, dividing it by stanzas or lines. <br> Step2: Use the timer to allot specific memorization time for each part.<br> Step3: Practice these sections out loud, looking at your reflection in the mirror for reinforcement.<br> Step4: Use the flash cards to write down difficult or key lines for extra practice.<br> Step5: A…	infeasible
518	You need to practice for a drama audition but have no rehearsal partner. Available tools: a deflated football, a mirror, a copy of the script, a book, a broken watch, water, a case of bottled water, a voice recorder that has run out of memory, cough drops, and a non-functioning microwave. With the voice recorder not functioning, how do you maximize your rehearsal time?	Yes	conventional	Step1: Read your script repeatedly using the mirror for visual feedback on your expressions.<br> Step2: Use the deflated football, book and broken watch as props to act out scenes.<br> Step3: Use bottled water to keep hydrated during rehearsal and cough drops if needed.<br> Step4: Review your performance by watching your expressions in the mirror. You can learn your lines and stage movements thor…	inefficient
519	You need to produce a project representing the Solar System but don't have any craft supplies. Available tools: a rubber band, a can of dried paint, cotton, poster board, a pile of old clothes, a marker, a damaged model of the Solar System, toothpicks, different size balls, and an empty glue bottle. How could you create the model despite not being able to glue the components?	Yes	unconventional	Step1: Arrange the different-sized balls on the poster board as per the sizes of the planets in the Solar System. Step2: Use the toothpicks to carve planet names into the dried paint can. Step3: Use a marker to color and detail the discarded Solar System model's sun and stick it on the poster board. Step4: Use cotton to represent clouds and asteroid belts. Step5: For orbits, stretch the rubber ba…	inefficient
521	You need to create a 3D model of a cell for biology class, but the local crafts store is closed. You only have available a stapler, umbrella, a ruler, scissors, masking tape, colored markers, strings, old magazines, empty containers of various sizes, glue, and a balloon. However, the colored markers are dried up, the scissors' blades are dull, the glue is almost dry and hard to use, and the stapl…	Yes	unconventional	Step1: Inflate the balloon, it'll represent the cell.<br> Step2: Cut out different shapes from the old magazines using the dull scissors or tear them to represent the organelles in the cell.<br> Step3: Attach these cutouts on the balloon using the masking tape.<br> Step4: The ruler can be used as a stick by attaching it on the underside of the balloon with masking tape, serving as a handle.<br> S…	inefficient
522	You have to paint a mural for your art class that represents a local historic event, but the art supplies at school are very limited and old. The only tools available are misshaped paintbrushes, pencils, some old newspapers, dried up acrylic paints, a palette with few colors, chalk, wrapping paper, a bottle of conditioner, and an old white blanket. The dried acrylic paints can't be refreshed, the…	Yes	conventional	Step1: Sketch the imagery for the historical event on the blanket using pencils. <br> Step2: Cut out different shapes from the old newspapers and colored wrapping paper and paste them onto the sketched areas to create a collage effect. <br> Step3: Use the hard bristle brushes dipped in conditioner to scrub at the dried acrylic paints, loosening them for use.<br> Step4: With the refreshed paints, …	infeasible
523	You need to create a multimedia presentation for your history class, but your laptop isn't functioning. You have envelopes, a printer, a friend's computer (for limited time), internet access, a box of old letters, watercolors, PowerPoint app, and your written draft of the presentation on the smartphone. Unfortunately, your friend's computer is frequently freezing and shutting down, the PowerPoint…	Yes	conventional	Step 1: Use the friend's computer when it's functioning to search for and print useful visuals for your presentation from the internet. <br> Step2: Utilize the printed materials along with the old letters to create a creative, collage-style presentation on the envelopes.<br> Step 3: Use watercolors for added appeal and to highlight important points. <br> Step 4: Reference your written draft on yo…	inefficient
524	You need to write an essay for English class but have writer's block. Your tools are a dictionary, a deck of playing cards, a writing prompt, a compass, headphones, old essays, textbooks, a half-filled notebook with class notes, a drawing book, and a timer. However, the writing prompt is vague, the textbooks and old essays are irrelevant to the essay topic, and the timer is broken. How do you sti…	Yes	unconventional	Step1: Use the dictionary to explore new ideas related to the essay topic. Step2: Utilize the deck of playing cards for a mind-clearing break. Step3: With headphones on, listen to some inspiring or mood-setting music to stimulate creative thinking. Step4: Review class notes in your half-filled notebook to find relevant information. Step5: Draw or sketch ideas in the drawing book to visualize your…	infeasible
525	You have to measure the height of a tree for your environmental science project without climbing it. The tools you have are wool yarn, a slinky, a long stick, a frisbee, a sunny day, a pair of roller skates, a math notebook, a friend who is 6 feet tall, and a measuring tape. But suddenly, it becomes a cloudy day and the shadows are faint or not present, the measuring tape is broken, and the math …	Yes	unconventional	Step1: Ask your friend to stand next to the tree. <br> Step2: Use the stick to compare the height of your friend to the height of the tree. <br> Step3: Mark off each interval that is the same height as your friend with the wool yarn tied around the tree. <br> Step4: Once the tree's height has been divided into equal segments, count the number of segments. <br> Step5: Multiply the number of segmen…	infeasible
526	You need to record a vocal presentation for your language class, but you live in a noisy neighborhood. You only have an old carpet, a set of dice, sewing kit, a baseball, some pillows, a small wardrobe, a smartphone, an ice pack, and a quiet-time window very early in the morning. The quiet-time window is extremely short, the smartphone’s microphone is damaged, and the wardrobe is already filled w…	Yes	unconventional	Step1: Use the old carpet and pillows to create a makeshift soundproof booth. Arrange the items around you, while making sure to leave space for your smartphone.<br> Step2: Download a recording app which can amplify microphone input and filter background noise on your smartphone.<br> Step3: Record your presentation during the quiet-time window early in the morning.<br> Tools: Old carpet, pillows,…	inefficient
527	You're supposed to give an oral report to your class over a video call, but your Internet connection is not always reliable. You have a teddy bear, a wristwatch, a set of watercolors, a phone, some short video clips, a text-to-speech app, a football, a slide presentation, and a script for your report. Your phone doesn't have enough storage space to record a long report, the text-to-speech app has…	Yes	conventional	Step1: Read and record parts of your report as short audio clips using your phone. <br> Step2: Use your watch to time and break down your slide presentation into short manageable parts that coordinate with the audio clips. <br> Step3: Combine the audio clips with corresponding slides and if the Internet connection drops, email or message your pre-prepared parts through your phone to your class fo…	inefficient
529	Your history teacher has asked you to create a timeline of significant world events over the last 100 years for a project. But you can only use a large poster board, scissors, a tomato, old magazines, a hairbrush, a notebook full of doodles, a coat hanger, colored pencils, and glue. The old magazines do not have any relevant images, the colored pencils are too short or broken, and the large poste…	Yes	unconventional	Step1: Straighten the edges of the poster board by placing it under the heavy books overnight.<br> Step2: Use scissors to shape the coat hanger into a straight line and stick it onto the board using glue, this will be your timeline.<br> Step3: Cut out shapes from the old magazines, write the major events and dates on them using the short or broken colored pencils.<br> Step4: Fix these cut-out sha…	inefficient
530	You have forgotten your night lamp at home and you need a source of soft light for your hotel room at night. Tools available: a shoelace, a book, a coffee mug, a hat, a laptop, a trouser hanger with clips, a cell phone, a pencil case, a water bottle, and a white paper towel. However, the cellphone's flashlight is not working, the water bottle is not translucent, and the trouser hanger does not ha…	Yes	unconventional	Step1: Open your laptop and adjust the brightness to the lowest.<br> Step2: Lay the white paper towel over the laptop screen to diffuse the light.<br> Step3: Use the book to prop up the laptop screen for a more targeted light source.<br> Now, you have a makeshift night lamp in your room.	efficient
531	The hotel room doesn't have a wall clock and there's important business conference that you cannot afford to miss. Available tools: a cup, a large round serving tray, a cell phone, a laptop, a ruler, scissors, a book, a piece of chalk, a notepad. Constraint: The cell phone battery is nearly dead and there is no Wi-Fi or internet connection to set the correct time on the laptop. How can you keep t…	Yes	conventional	It is not possible to keep track of time accurately with these tools without the aid of a working electronic device or an observable natural phenomenon (like the sun, which could be used for a sundial). Without the ability to model or measure the passage of time independently, an estimate would be wildly inaccurate.	none
532	You need to iron your wrinkled shirt for a meeting, but the hotel doesn't provide an iron. Tools available to you include a hairdryer, a soap bar, a flat ceramic dish, a tea kettle, a pack of tissues, a pair of socks, a phone charger, a laptop, a towel. Constraint: The water in the hotel is not working, and thus the kettle can't be filled. How would you smooth out the wrinkles using only these it…	Yes	unconventional	Step1: Warm up your laptop by using it.<br> Step2: Use the towel as a barrier between your shirt and the laptop.<br> Step3: Place the shirt on a flat surface with the towel under it and the hot side of the laptop (usually the bottom) on the wrinkled area of the shirt.<br> Step4: The heat generated from the laptop should mimic that of an iron and straighten out the wrinkles. Make sure to move the …	inefficient
534	The hotel room is too bright in the morning and you want to sleep in, but the curtains do not fully block the sunlight. Available tools are a towel, a pair of slippers, a piece of cardboard, a bedsheet, some clothespins, a sewing kit, a newspaper, a coat hanger, a travel umbrella. Constraint: The hotel room window is a large floor to ceiling type and the bedsheet is too small to cover the entire …	Yes	unconventional	Step1: Hang the travel umbrella at the top middle part of the window to block sun at the highest point (use coat hanger and/or clothespins if necessary to suspend it).<br> Step2: Use the large piece of cardboard and attach it below the umbrella with clothespins. <br> Step3: Use the towel to cover the area which is still exposed, attaching it with clothespins to the cardboard.<br> Step4: For remai…	infeasible
535	Your necklace has tangled into a very tight knot, and the hotel does not provide any tools for untangling. Available tools include a shampoo, a fork, a safety pin, a pen, a hair brush, a toothpick, a hair dryer, a credit card and hand cream. Constraint: The necklace is made of very fine and delicate chain, so using a safety pin or credit card may damage it. How do you untangle it using just these…	Yes	unconventional	Step 1: Apply a small amount of hand cream to the knot. This may help to lubricate the chain and make it easier to move.<br> Step 2: Use the toothpick gently to separate the individual links and untangle the knot. Be very careful as the chain is delicate.<br> Step 3: Use the hair dryer on a low setting to heat up the chain and make it more pliable. This might make untangling easier.<br> Step 4: C…	efficient
536	You want to exercise in your room, but can't find any fitness channel on TV. Available tools are a towel, a table lamp, a chair, a TV remote, a pair of socks, a wireless internet connection, a bar of chocolate, a laptop, two filled water bottles. Constraint: The wireless internet connection is very slow and unstable, and cannot stream videos. How will you manage a small workout with these availab…	Yes	unconventional	Step1: Use the chair for tricep dips and step-ups. Step2: Use the two filled water bottles as weights for bicep curls, shoulder press, and other strength exercises. Step3: Use the towel for stretching and yoga moves. Step4: Munch on the chocolate bar post-exercise for a quick energy boost. Tools: Chair, filled water bottles, towel, bar of chocolate.	efficient
537	The air in your hotel room is stale and you want to freshen it up. Tools available: a coffee beans, a shower cap, a clean sock, a paper, a fan, a TV remote, a cut lemon, a pencil, a bowl of water. Constraint: The fan doesn't have adjustable directions to move the air where you want it to go, and the lemon is too small to adequately freshen the room. How will you use these tools to freshen up the …	Yes	unconventional	Step1: Put the coffee beans in the sock and tie it off. This creates a simple, makeshift air freshener as coffee beans can absorb odors. <br> Step2: Place the makeshift air freshener in front of the fan. This lets the air moving past the sock pick up the scent of the coffee beans.<br> Step3: Use the bowl of water and the cut lemon to create a natural air freshener. While this may not be sufficien…	inefficient
538	It's your friend's birthday tomorrow, but all the shops are closed. You want to make them a birthday card. Tools available: a pillow, a room service butter knife, a bottle of nail polish, a hotel guide book, a hotel brochure, a pack of colored pencils, an empty water bottle, a menu card, a roll of toilet paper. Constraint: The brochure and menu card contain dark and busy prints, making it difficu…	Yes	unconventional	Step1: Take pages from the hotel guide book and use the butter knife's blunt edge to mimic the effect of scoring, and fold the pages neatly into a card.<br> Step2: Using the colored pencils, draw a birthday message and some illustrations on the pages. <br> Step3: For some shine and effect, use the nail polish judiciously to highlight and adorn certain parts of the card. <br> Step4: Stuff the card…	infeasible
539	The hotel's internet has gone down and you need to send an important email. Available tools: a coasters, a snack bar, a USB OTG cable, an external hard drive with old business files, a small satellite GPS device, your smartphone with limited data, a notepad, your laptop, a room key card. Constraint: Your smartphone has an incompatible port that can't connect to the laptop, and your data plan does…	Yes	conventional	Step1: Write your email on the notepad.<br> Step2: Use your smartphone to take a picture of the written email. <br> Step3: Connect the smartphone to the Internet using your limited data and send the picture as an email attachment. Tools used: Notepad, Smartphone.	inefficient
361	Your bunny's water bottle has broken, and you need to find an unconventional way to provide it with water. Tools available include a plastic cup, a bicycle pump, a garden nozzle, an ice cube tray, several sponges, a deck of cards, a pipette, a small flowerpot, a large syringe, a small funnel, and a paintbrush. However, the sponge has already been used with cleaning chemicals which makes it harmfu…	Yes	conventional	Step1: Fill the plastic cup with water.<br> Step2: Use pipette to transfer the water into the small flowerpot.<br> Step3: Place the flowerpot inside bunny's cage making sure it is steady and bunny can reach it. <br> This way the bunny can drink directly from the flowerpot.	inefficient
362	You have accidentally dropped your pet bird's cage key down a narrow gap between two very heavy pieces of furniture. Tools available to you include a sheet of tin foil, a plastic fly swatter, a rubber duck, a rolling pin, a pencil, a coat hanger, a roll of duct tape, a small teddy bear, a magnet, a metal slinky, and Christmas lights. To complicate matters, the key is made from aluminum, which isn…	Yes	unconventional	Step 1: Unwind the coat hanger to form a long piece of wire.<br> Step 2: Attach the duct tape sticky-side-out at the end of the unwound coat hanger.<br> Step 3: Insert the duct-tape end of the coat hanger into the gap to retrieve the key, carefully maneuvering it to stick to the tape.	inefficient
363	Your hamster has escaped its cage and found its way into a small hole on your wall. Tools available to you include a vacuum cleaner, a baseball cap, a piece of string, a curtain rod, a small flashlight, a paper towel roll, a toy truck, a measuring cup, a box of matches, a clothes hanger, and a pack of chewing gum. But, there's a power outage making the vacuum cleaner unusable. How can you lure th…	Yes	unconventional	Step1: Chew some gum from the pack to make it sticky.<br> Step 2: Attach the chewed, sticky gum to the end of the curtain rod.<br> Step 3: Place the baseball cap open on the floor below the hole (to function as a safe landing zone).<br> Step 4: Carefully use the curtain rod with the gum to softly touch the hamster and coax it out of the hole. The small flashlight can be used to provide some light…	inefficient
364	Your dog's toy has gotten stuck on the roof of your house. The tools available include a toothbrush, a spatula, a skate board, a plastic bucket lid, a garden hose, a broom with a broken handle, a skipping rope, a rubber band, a bucket of water, a kayak paddle. Unfortunately, a water source is not immediately available, making the hose unusable. How can you retrieve the toy using only these items?	Yes	unconventional	Step1: Tie the skipping rope securely to the broken broom handle using the rubber band. <br> Step2: Use the extended reach from this combination to dislodge the toy from the roof. <br> Step3: Use the bucket lid or spatula to catch the toy as it falls to prevent it from getting damaged.	infeasible
365	Your rabbit's water bottle has cracked and needs to be replaced, but you don't have a spare bottle. The tools available to you are a plastic bag, a shower cap, some duct tape, a funnel, a sponge, a small container of glue, a grater, a piece of tinfoil, a clothespin, a travel mug lid, an chopsticks. However, the glue is dried up and the duct tape isn't adhesive enough to secure the funnel to the b…	Yes	unconventional	Step1: Open the travel mug lid and place the sponge inside, ensuring it's packed tightly and secure. <br> Step2: Use the chopsticks to create small holes in the sponge for water to pass through. <br> Step3: Attach the lid to your plastic bag tightly using the clothespin. <br> Step4: Fill the bag with water and hang it above your rabbit's cage. Water will slowly drip from the sponge, acting as a t…	inefficient
366	Your dog has mud all over it and has taken refuge in the shower stall, making it impossible to clean it properly. The tools available include a bottle of shampoo, a beach towel, a rubber gloves, a scarf, a shower curtain, a garden hose, a blender pitcher, a pair of wet/dry vacuum, a snow shovel, a mop, and a toothbrush. Unfortunately, the mop head is missing. How can you clean your dog using only…	Yes	conventional	Step 1: Put on the rubber gloves to protect your hands from the mud and the dog's fur.<br> Step 2: Use the garden hose to wet your dog thoroughly and remove the large chunks of mud.<br> Step 3: Use the shampoo and toothbrush to gently scrub the remaining mud off of your dog's fur.<br> Step 4: Use the wet/dry vacuum to remove the excess water and mud from your dog's fur and the shower stall.<br> S…	inefficient
367	You need to give your cat some medication, but it refuses to take it and keeps running away. The tools available to you are a set of measuring spoons, a turkey baster, a blanket, some wet cat food, a candle, a pair of scissors, a bottle of nail polish, a rolling pin, a feather duster, an empty pill bottle, and a a pair of pliers. The problem is the cat is on a medication that suppresses its appet…	Yes	conventional	Step 1: Use the wet cat food and measuring spoons to make small edible balls. <br> Step 2: Use the pill bottle and scissors to grind the medication into a powder.<br> Step 3: Mix the powdered medication into the cat food balls.<br> Step 4: Use the blanket to swaddle the cat gently but firmly.<br> Step 5: Use the turkey baster to open the cat's mouth and immediately insert the medicated food ball.…	infeasible
368	Your dog's food bowl has fallen on the floor and rolled under your wardrobe, but it's too heavy and wedged in to be moved. Tools available to you include a flexible metal ruler, a broomstick, a set of pipe cleaners, a pool noodle, a crochet hook, a crowbar, a lava lamp, a stapler, a yoga mat, a roll of plastic wrap, and a CD case. The catch is that the broomstick is not long enough to reach the b…	Yes	unconventional	Step1: Connect multiple pipe cleaners end to end to form a long chain. <br> Step2: Bend a hook shape at one end of this chain.<br> Step3: Attach this chain to the end of the broomstick with the help of the stapler.<br> Step4: Use this extended, hooked broomstick to reach and pull out the dog bowl from under the wardrobe.	infeasible
370	Your dog has gotten loose on a walk and is running away but isn't responding to voice commands. The tools available to you include a doggy treat, a reusable plastic bag, a bottle of sunscreen, a rain coat, a whistle, a pocket mirror, a travel mug, a small hand towel, a beach umbrella, a squirt gun, and a wristwatch. Your dog is, however, deaf and cannot hear the whistle. How can you catch your do…	Yes	conventional	Step1: Use the doggy treat to get the dog's attention.<br> Step2: Once the dog is interested, reel back your arm and throw the treat in your direction. <br> Step3: While the dog is busy retrieving the treat, quickly approach and secure the dog with the hand towel, using it as a makeshift leash.	efficient
371	Your TV remote has fallen behind the sofa, and you cannot reach it. Tools available: a box of matches, a drinking straw, a pencil, a flashlight, a book, a coat hanger (which is broken and cannot extend in a straight line), a pair of sunglasses, and a long piece of string.	Yes	unconventional	Step1: Straighten the coat hanger as much as possible to create a hook on the end.<br> Step2: Attach the flashlight to the end of the coat hanger using the string to illuminate the area beneath the couch.<br> Step3: Use the hook end of the coat hanger to retrieve the remote.	infeasible
372	A small spider is climbing up your wall towards a valuable painting. Tools available: a roll of duct tape, a pair of tongs (which are too short and do not have enough reach), a vacuum cleaner without any power, a towel, a can of soda, a hammer, a mop, and a stack of books.	Yes	unconventional	Step1: Use the mop to gently alter the spider's path and guide it away from the painting. <br> Step2: Roll a sheet of duct tape, sticky side out, and trap the spider by lightly touching it with the tape.<br> Step3: Carefully remove the spider by peeling off the tape outside.	inefficient
373	A glass of red wine has spilled on your carpet. Tools available: a fan, a sponge, a bowl of ice, a bag of flour, a notebook, a pair of scissors, a hairdryer (which is out of order and won't turn on), and a bottle of vinegar.	Yes	unconventional	Step1: Blot the spilled wine on your carpet with the sponge to absorb as much liquid as possible. <br> Step2: Scatter some flour over the stained area generously to absorb residual wine.<br> Step3: After 15-20 minutes, use the notebook, fold it into a scoop-like shape, collect as much flour as possible.<br> Step4: Pour vinegar over the residue. The acid in vinegar will neutralize the stain.<br> S…	infeasible
374	Your house key has fallen between two cushions on your sofa. Tools available: a box of tissues, a magazine, a rubber band, a plastic bag, a ruler (which is made of flexible rubber and can't push the cushion), a roll of aluminum foil, a rubber ball, and a toothbrush.	Yes	unconventional	Step1: Open plastic bag and put it over your hand, creating a barrier between your hand and any dirt or grime. <br> Step2: Use your covered hand to dig between cushions, pushing aside fabric to make visual contact with the key.<br> Step3: Once key is found, use the toothbrush to gently nudge it closer to the opening between the cushions.<br> Step4: Use your hand (still covered with the plastic ba…	inefficient
376	Your favorite picture frame has a chip in its finish. Tools available: a container of glitter, a paintbrush, a can of paint (which is dried up and non-usable), a roll of wax paper, a pair of gloves, a tube of glue, a spoon, and a pack of crayons.	Yes	conventional	Step1: Put on the gloves. <br> Step2: Apply glue to the chipped part with the spoon. <br> Step3: Sprinkle glitter over the glued area. <br> Step4: Use the paintbrush to remove any excess glitter and ensure well coverage. <br> Step5: Let it dry.	efficient
377	A candle has melted onto your wooden coffee table, and you need to remove the wax. Tools available: a bottle of rubbing alcohol, a credit card, a pair of tweezers, a cloth, a sharp knife, a hairdryer (which is set on a high heat that could damage the wooden table), a pencil, and a plastic spatula.	Yes	unconventional	Step1: Use the hairdryer on a low setting to soften the wax but not damage your table.<br> Step2: Use the plastic spatula or credit card to gently scrape off the softened wax.<br> Step3: If any residue is left, apply rubbing alcohol on a cloth and gently wipe the surface.<br> Step4: Dry the area with a clean cloth. If necessary, repeat steps 3 and 4.	infeasible
378	You need to move a heavy piece of furniture across the room, but you can't lift it. Tools available: a tape measure, a pair of thick socks, a few balloons, a skateboard (which has missing wheels), a small rug, a pencil, a large piece of cardboard, and towels.	Yes	unconventional	Step1: Place the skateboard under one end of the furniture. <br> Step2: Tilt the furniture and slide the small rug under the other end. <br> Step3: Using towels, push the furniture. The skateboard and rug will act like wheels enabling the furniture to move easily. <br> If needed, use the cardboard as a makeshift ramp for inclines. The pair of thick socks can provide extra traction while pushing. …	infeasible
379	You want to display a bouquet of flowers in your living room but don't have a vase. Tools available: a spaghetti jar, a roll of ribbon, a plastic container, a pitcher, tissue paper, a large glass, a pair of scissors, and a wine bottle (which is too narrow at the neck to host the bouquet).	Yes	unconventional	Step1: Clean the large glass and spaghetti jar thoroughly.<br> Step2: Put the spaghetti jar inside the large glass.<br> Step3: Fill the space between the glass and jar with tissue paper to add color and make it visually appealing.<br> Step4: Use scissors to cut a piece of ribbon and tie it around the large glass for decoration.<br> Step5: Fill the jar with water and then carefully place your bouq…	inefficient
380	A fly is buzzing around your living room, and you need to catch it. Tools available: a box, a sheet of paper, a lampshade, a bottle of hand sanitizer, a paper towel roll, an oven mitt, a pair of gardening gloves, and a plastic bag (which has a hole in it).	Yes	unconventional	Step1: Put on the oven mitt and gardening gloves to protect your hands. <br> Step2: Turn on the lamp to attract the fly. <br> Step3: Once the fly lands on the lampshade, quickly place the box over it. <br> Step4: Slide the paper underneath the box to trap the fly. <br> Step5: Lift the box, keeping the paper underneath, to capture the fly inside.	infeasible
381	Your curtains are uneven, and you need to adjust their length to match. Tools available: a razor blade, duct tape, a needle and thread, a pair of scissors, a baseball cap, a stapler, a toothpick, a small button, a rubber band, a candle, paper clips, and a pair of gloves. The scissors are too dull to cut the fabric. How do you adjust the curtains to even lengths using only these items?	Yes	conventional	Step1: Use the razor blade to cut the longer curtain to the same length as the shorter one, being sure to leave enough length to hem. <br> Step2: Take the small button and the needle and thread. Sew the button onto the inside bottom of the short curtain.<br> Step3: Make a small loop in the thread and pull it over the button, pulling tightly to create a small gather.<br> Step4: Repeat this process…	inefficient
382	A lightbulb in your living room needs to be replaced, but your step ladder is unavailable. Tools available: a long wooden spoon, a sturdy suitcase, a roll of toilet paper, a thick shoelace, a thick blanket, a strong cube-shaped box, a mop handle, a stack of heavy books, a broom, a whisk, a small, flat pillow, and a bottle of water. The box isn't sturdy enough to hold your weight. How do you safel…	Yes	unconventional	Step1: Stack the books on top of the sturdy suitcase.<br> Step2: Use the small pillow and thick blanket on the top book for added comfort and safety.<br> Step3: Stand on this improvised platform to reach the lightbulb. <br> Step4: Use broom to loosen the bulb if needed; then replace the bulb by hand carefully. If bulb is hot, use thick shoelace as an improvised tool to unscrew and screw the bulbs…	inefficient
383	You accidentally dropped your phone under a large bookshelf, and the phone is too far to reach. Tools available: a piece of chewing gum, a hanger, a shopping bag, a ruler, a nail file, a yardstick, a small magnet, a feather duster, a lint roller, a flat plastic spatula, a pair of glasses, and a fishing line. The phone has a non-metallic case. How do you retrieve your phone from under the bookshel…	Yes	unconventional	Step1: Straighten the hanger, leaving the hook-end intact.<br> Step2: Attach the yardstick to the straightened-end of the hanger using a chewing gum to create a long reaching device.<br> Step3: Place the shopping bag on the hook-end of the hanger.<br> Step4: Maneuver the shopping bag under the bookshelf using the hanger-yardstick device.<br> Step5: Maneuver the phone into the shopping bag.<br> St…	infeasible
384	You have to hang a wall decoration, but you can't find your measuring tape. Tools available: a screwdriver, a bookmark, a clothes hanger, a deck of cards, a watch, a dollar bill, a hair clip, a piece of newspaper, a pair of tweezers, a piece of ribbon, a pencil, and a piece of string. The dollar bill has been torn into pieces. How do you measure the space and hang the decoration evenly using only…	Yes	unconventional	Step1: Align the deck of cards along the wall where the decoration is to hang, using the cards as a makeshift ruler. <br> Step2: Use the pencil to mark both ends of the decoration on the wall. <br> Step3: Using the hair clip and string, thread the string through the clip and use it as a makeshift plumb bob to ensure the decoration hangs straight. <br> Step4: Use the screwdriver to secure the deco…	inefficient
385	Your living room plants need watering, but your watering can is missing. Tools available: a small bucket, a plastic cup, a sponge, a hairdryer, a clean spray bottle, a plastic bag, a funnel, a coat hanger, a pair of gumboots, an eyedropper, an apron, and a large bowl. The spray bottle is missing the straw component that sucks up the water. How do you water your plants efficiently and effectively …	Yes	conventional	Step1: Fill the bucket with water using the plastic cup. <br> Step2: To control the flow and not drench the plants, place the funnel on the pot's soil and pour water from the bucket into the funnel, either directly or using the cup; repeat for each plant. <br> Step3: Additionally, if you have sensitive or delicate plants, use the eyedropper to administer water gently at the base of these plants.	inefficient
386	Your pet has knocked over and shattered a flower vase in the living room, scattering broken glass and water all over the floor. You have a dustpan with a broken handle, a bottle opener, a small dish, a large kitchen spatula, a rubber glove, a tablecloth, a mop with a missing head, a roll of paper towels, a pair of socks, a hair tie. You have only one rubber glove. How do you clean up the mess?	Yes	unconventional	Step1: Wear the rubber glove to protect your hand. <br> Step2: Use the large kitchen spatula to scoop up the larger shards of glass and put them into the small dish. <br> Step3: Fold the tablecloth to cover the rest of the glass and water on the floor. <br> Step4: Use the broken dustpan to collect the smaller shards and water absorbed by the tablecloth.<br> Step5: Use the paper towels to absorb a…	inefficient
387	Your kid has spilled a bag of small toys all around the living room, and some have slid under a heavy table with a small gap clearance. You have a curtain rod, a vacuum cleaner, a stuffed bear, a flashlight, a pool noodle, a roll of duct tape, a shoelace, a kitchen towel, a set of plastic cups, and a kitchen tong. The pool noodle is full of holes. How do you retrieve the toys from under the table?	Yes	unconventional	Step1: Tape the flashlight to the end of the curtain rod using duct tape. Step2: Lie down and use the flashlight-rod to illuminate the area under the table and identify the locations of the toys. Step3: Use the kitchen tong to grab and retrieve any toys within reach. Step4: If any toys are out of reach, attach the shoelace to a plastic cup and use the rod to maneuver it to push toys closer before…	inefficient
388	The living room curtains have come undone on one side, and you notice that the curtain rod bracket was torn from the ceiling leaving a hole. You need to reattach the curtain rod to the wall, but you don't have a drill. You have a raw egg, a toy hammer, a bottle of rubber cement, a screwdriver, a piece of chalk, a tablecloth, a small bag of powdered milk, a stack of post-it notes, a plastic spoon.…	Yes	unconventional	Step1: Use the screwdriver to scrape away any debris from the hole.<br> Step2: Mix powdered milk with a little water to make a paste, and use the plastic spoon to fill the hole, smoothing it with the back of the spoon.<br> Step3: Once dry, apply rubber cement to the back of the curtain bracket.<br> Step4: Press the bracket firm against the wall, using the chalk to mark its position.<br> Step5: Wa…	infeasible
389	Your living room area rug has become severely wrinkled and curled, making it a trip hazard. You don't have a carpet steamer. You have a bottle of fabric softener, a hammer, a spray bottle of water, a pillow, a wooden rolling pin, a hair brush, an adjustable wrench, a can of soda, a damp cloth, and an iron. The iron isn't working properly. How do you flatten the rug safely?	Yes	unconventional	Step1: Fill the spray bottle with a mixture of water and a bit of fabric softener.<br> Step2: Spray this diluted solution all over the rug focusing more on the curled areas.<br> Step3: Use the wooden rolling pin to flatten out the rug, putting extra pressure on the problematic areas.<br> Step4: Leave the rug to dry naturally. <br> Note: Make sure to test the fabric softener on an inconspicuous pa…	efficient
390	A small family of rodents has made a nest in your living room couch's lining. Tools available: a pair of tongs, a golf club, a feather duster, a piece of string, a shoebox, a jar of peanuts, a plastic water bottle, a candle, a notebook, and a pencil eraser. The rodents are peanut allergic. How do you remove them without harming them?	Yes	unconventional	Step1: Open the jar of peanuts(despite their allergy, rodents are attracted to its smell) and place it some feet away from the couch to lure rodents out of the couch.<br> Step2: Use the shoebox and piece of string to create a trap. Place the shoebox upended near the open peanut jar and tie the string around the box, making sure the end of the string is in your hand.<br> Step3: Once all rodents ha…	infeasible
551	You need to fix the leg of a chair in your cabin which has come loose, but you don't have screws or available tools. You have a pen, duct tape (which lacks adhesive properties), a few stacks of post-it notes, office stamps, and rubber bands. Despite the non-sticky duct tape, how would you fix the chair?	Yes	unconventional	Step1: Use the pen to poke holes through the duct tape.<br> Step2: Thread the rubber bands through these holes.<br> Step3: Wrap the duct tape around the broken leg of the chair and secure it by looping the rubber bands over the top and bottom of the chair leg.<br> Step4: Use stacks of post-it notes to stabilize the chair if necessary.<br> The office stamps are not required.	inefficient
552	Your office pen holder has broken and you don't have a replacement. Available items are a large coffee mug (which is already full of coffee), colourful paper clips, a wide-brimmed hat and sticky notes. How can you create a replacement pen holder with the coffee-filled mug?	Yes	conventional	Step1: Drink or pour out the coffee from the mug. Step2: Clean the mug thoroughly to ensure it is dry and free of coffee residue. Step3: Place your pens into the now empty and clean coffee mug. No other items required. The large coffee mug now serves as a replacement pen holder.	efficient
553	You need to leave a note for a colleague but there are no sticky notes. Available tools: printer paper (which is out of stock), envelopes, tape, a stapler, and a marker. How can you leave a note having only envelopes?	Yes	unconventional	Step1: Take an envelope and a marker.<br> Step2: Write your message on the envelope using the marker.<br> Step3: Stick the envelope (with the note) onto your colleague's desk using the tape. This way, they are sure to see your message.	efficient
554	You need to arrange your files but your file rack is not available. Tools available are stack of books, a shoebox (filled with miscellaneous items), metal paperclips, and rubber bands. How can you manage the filing given that the shoebox is out of limits?	Yes	unconventional	Step1: Take metal paperclips, use them to gather together related papers into groups. Step2: Use rubber bands to bind together these groups more securely so that papers won't fall out. Step3: Use stack of books as a makeshift filing system by placing each group of files between two books to keep them upright and organized. This way stack of books can acts as a divider between different groups of …	inefficient
556	You spilled coffee on your desk and you ran out of tissues. The available materials are an old newspaper (whose ink starts to run when it gets wet), a roll of toilet paper, an empty plastic bag, and a water bottle. The spilled coffee is incredibly hot. What can you do to clean it up?	Yes	conventional	Step1: Pick up the roll of toilet paper. <br> Step2: Unroll a considerable amount of the toilet paper then, while keeping it attached to the roll, lay it over the spilled coffee, this is used to absorb the liquid. <br> Step3: Once most of the liquid has been soaked up, tear off the damp piece of toilet paper and dispose of it into the plastic bag.<br> Step4: Repeat this process as necessary until…	efficient
558	Your glasses broke and you need them to work. Available tools include a paper clip (that breaks when trying to bend), duct tape, a stapler, and a magnifying glass. How can you fix the glasses with a brittle paper clip?	Yes	conventional	This might not be a permanent solution, but it may work temporarily:<br> Step1: Align the broken pieces of the glasses as best as possible. <br> Step2: Use the duct tape to carefully wrap around and secure the break. <br> Step3: Staple the duct tape for added security if necessary, being careful to avoid the lens and any part touching your face. <br> No feasible use for the paper clip or magnifyi…	infeasible
559	Your office table is shaky. The available tools include a stack of cardboard (too thin and crumbles under weight), rolls of duct tapes, a stapler and rough papers. How can you stabilize the table with thin and fragile cardboard?	Yes	unconventional	Step1: Fold the cardboard multiple times to increase its thickness and strength. <br> Step2: Use duct tape to secure the folds and prevent the cardboard from unfurling.<br> Step3: Slide the folded and taped cardboard under the leg of the table that is shorter to level it out and reduce wobble.<br> Step4: If necessary, repeat step1-3 until the table is no longer shaky.	efficient
562	The temperature is too high and your office fan isn't working. The available tools are a stack of paper, sticky tape, a stapler, and a small desk lamp. The stack of paper is ultra-thin and fragile. How can you build a makeshift fan?	Yes	unconventional	Step1: Take several sheets of paper and overlap them slightly, forming a fan pattern.<br> Step2: Use the sticky tape to secure the base of the paper sheets together, ensuring they do not separate. <br> Step3: Use the stapler to further reinforce the taped base, adding extra stability.<br> Step4: Hold the base and gently wave the fan back and forth to create a breeze. The desk lamp is not useful i…	inefficient
563	You need to capture an image of a large document using your phone, but there's no tripod. Available tools are a stack of books, a small box, a roll of duct tape and a coffee cup. However, all the books are of different sizes and shapes making it challenging to stack them stable for supporting anything. How can you make a placeholder for your phone?	Yes	unconventional	Step1: Flatten the small box and place it on a flat surface.<br> Step2: Position the coffee cup on top of the flattened box.<br> Step3: Use the duct tape to secure the coffee cup to the flattened box ensuring it is stable.<br> Step4: Insert your phone in the coffee cup at the angle required to capture the document image.	inefficient
564	You accidentally snapped your ID card in half. Tools available: clear packing tape, printer paper, a laminating machine, and a paper clip. The laminating machine you have can only be used with special laminating pouches, which you don't have. How can you repair your ID card?	Yes	conventional	Step1: Align the two halves of the ID card to ensure they match exactly.<br> Step2: Use the clear packing tape to carefully join the broken halves together on both sides, ensuring no tape crosses into the ID info.<br> Step3: Press the taped card on a flat surface to make sure it's flat.<br> Step4: Fold the printer paper and place the repaired card between the folded paper as makeshift pouch.<br> …	infeasible
565	You need to organize cables on your desk but don't have cable ties. Available tools are rubber bands, binder clips, twist ties from bread, and sticky tape. Unfortunately, the cables you need to organize are notably thick and heavy. How can you keep your cables neat and organized?	Yes	conventional	Step1: Group the cables together. <br> Step2: Use the binder clips to hold the cables in place.<br> Step3: Secure the binder clips together using the rubber bands to add extra strength and hold.<br> Step4: If cables are still loose, use the twist ties to secure any individual cables.<br> Step5: Use the sticky tape to fasten the cables neatly to the desk if needed.	inefficient
774	Your frisbee has become stuck high in a tree at the park. All you have are a tennis racket, a dog leash, a water bottle, a lunchbox, a yoga mat, and some loose wood scraps. The frisbee is firmly wedged between two branches and won't budge from prodding, and the tennis racket's strings are quite loose. How do you retrieve the frisbee?	Yes	unconventional	Step1, tie the dog leash to the tennis racket. Step2, throw the racket-leash combination towards the frisbee aiming to loop the leash over the branch. Step3, if successful, pull the leash to shake the branch or dislodge the frisbee. The water bottle, lunchbox, yoga mat and wood scraps can be used to retrieve the racket/leash if they get stuck too.	infeasible
776	You're in a park and your dog's leash breaks. Available tools: a belt, a couple of larger hair clips, a plastic bag, gum, and a pocket knife. The belt is a very thin fashion belt and isn't sturdy enough to hold the dog, and the hair clips are also small and flimsy. How can you make a temporary leash?	Yes	conventional	Step1: Open the plastic bag, cut it into long strips using the pocket knife. <br> Step2: Braid these strips to make them stronger and tie them together at one end.<br> Step3: Wrap one end of this braid around your dog's collar and tie it tightly. Chew the gum and use it to secure the knot.<br> Step4: Hold the other end to control your dog. This serves as your temporary leash.	efficient
779	A soccer ball has rolled into a thorny bush. All you have is a sketchbook, some markers, a hat, a kite, and a picnic basket. The kite string is too short to reach the soccer ball, and lacks the tensile strength to retrieve the soccer ball without breaking. How do you get the ball back without injuring yourself?	Yes	unconventional	Step1: Open the picnic basket and empty its content. <br> Step2: Wear the hat to protect your head from the thorny bush. <br> Step3: Extend your reach using the picnic basket. Use it to get close to the ball and then maneuver it to entrap the ball. <br> Step4: Gently pull back the basket with the ball inside. If needed, use the sketchbook or markers to guide the basket and avoid sharp thorns.	inefficient
780	A tree limb is blocking a path in the park. Tools available to you include a bicycle, a picnic blanket, a cooler box, a badminton racket, and a deck of playing cards. The limb is too large and heavy to be moved with the bicycle, and the bicycle tires are flat, minimizing its traction and pushing power. How can you move the limb aside?	Yes	unconventional	Step1: Use the badminton racket to wedge under one end of the limb. <br> Step2: Push down on the racket handle to leverage the limb until it is raised from the ground. <br> Step3: Once it's lifted, quickly slip the picnic blanket under. <br> Step4: Use the handles of the cooler box and pull the ends of the picnic blanket with the limb on top to the side of the path.	infeasible
782	Your kite is tangled in a bush at your local park. You have a badminton racket, a water bottle, a cooler, a frisbee, and a bike tire pump. The kite's lines are tangled around thorny branches, making it impossible to free without risking tearing and the badminton racket lacks the precision to delicate untangle the kite. How will you rescue the kite?	Yes	unconventional	Step1: Fill the water bottle from the cooler.<br> Step2: Soak the thorny area with water for lubrication and to make the branches slightly more pliable. <br> Step3: Using your bike tire pump, inflate the frisbee slightly to create a cushion.<br> Step4: Push the frisbee close to the bush and gently pull the kite lines doing your best to avoid the thorns using the handle of the pump for additional …	infeasible
784	You've lost your key in a sandy playground. You have a beach ball, a children's plastic shovel that is quite small and has a crack, a picnic blanket, an ice cream scoop, and a picnic umbrella. How should you do?	Yes	unconventional	Step1: Use the picnic blanket to cover a large area of sandbox. Slide it gently not to bury the key deeper.<br> Step2: Check if the key is on the blanket. If not, fold up the blanket to expose another section.<br> Step3: Use the children's plastic shovel or ice cream scoop to sift through any piles of sand. <br> Step4: Repeat until the key is found. If sand is too deep, use the beach ball and umb…	infeasible
785	Your picnic tablecloth won't stay in place due to strong winds in the park. All you have is a bike helmet, an empty cooler, a pack of disposable cups, a bike chain and a long sandwich baguette. This picnic table is unusually tall with a lip edge. How can you secure it?	Yes	unconventional	Step1: Spread the tablecloth over the table. Step2: Put the long baguette in the cooler. Step3: Place the cooler at one edge of the table, on top of the tablecloth. Step4: Lay the bike helmet on the other edge of the tablecloth. Step5: Fill the disposable cups with nearby natural materials (like stones) and place them along the remaining edges of the tablecloth. The weight of these objects will p…	inefficient
786	You're at a park and a bee won't leave your picnic area. You only have a baseball glove, a full water bottle with a small opening, a baby stroller, a bandana, and a toy car. How can you deal with this situation?	Yes	unconventional	Step1: Wet the bandana using water from the bottle. <br> Step2: Drape the wet bandana over the area where the bee is hovering to create a barrier.<br> Step3: Slowly push the bee away with the baseball glove on your hand for protection.<br> The dampness from the bandana, motion, and human smell may discourage the bee from returning.	efficient
787	You want to hang a pinata from a tall and quite bare tree branch at the park. Tools available to you include a jump rope, a picnic basket, a camping chair, a large water bottle, and a bike lock. How do you hang the pinata?	Yes	unconventional	Step1: Tie one end of the jump rope to the pinata. Step2: Throw the other end of the rope over the tree branch. Step3: Pull the rope until the pinata is at the desired height. Step4: Use the bike lock to secure the free end of the rope to a stable object (e.g. the camping chair), ensuring the pinata stays in place.	inefficient
788	A park water fountain is spraying water erratically and hot, and you want to stop it. Tools available: a picnic blanket, a cooler, a swimsuit, a pair of flip-flops and a roll of aluminum foil. How can you manage this situation?	Yes	unconventional	Step1: Wear the swimsuit and flip-flops for protection against the hot water.<br> Step2: Unroll a large piece of aluminum foil, make sure it's big enough to cover the fountain spray.<br> Step3: Next, carefully approach the fountain and place the aluminum foil over the water source to block the spray.<br> Step4: Place the cooler on top of the aluminum foil to ensure it stays in place.<br> Note: Be…	inefficient
789	You need to scrape off the mildew from the high edges and hard-to-reach corners of the pool but you don't have a pool scrubber. Available tools include a toothbrush, a large and sturdy spoon, a bicycle tire pump, a broom handle, a roll of duct tape, an old t-shirt, and a whisk. How would you clean the edges using these items?	Yes	unconventional	Step1: Connect the broom handle to the toothbrush by wrapping the duct tape around them tightly several times, creating a long scrubbing tool.<br> Step2: Wrap the old t-shirt around the bristles of the toothbrush for extra scrubbing power.<br> Step3: Use the assembled tool to scrape off the mildew from high edges and hard-to-reach corners of the pool. If needed, a sturdy spoon can be used for stu…	inefficient
790	You need to prop open the spring-loaded high-tension gate to the pool area but do not have a doorstop. Available tools: a large pool noodle, a beach chair, water jugs, a beach umbrella, a cooler, a yoga mat, an old towel, and a metal bucket. How would you keep the gate open with these items?	Yes	unconventional	Step 1: Take the beach chair and open it fully. <br> Step 2: Position the beach chair so it's halfway through the gate, effectively propping the gate open. <br> Step 3: Fill the metal bucket with water from the pool to add weight. <br> Step 4: Place the heavy metal bucket on the beach chair to add more stability and prevent the chair from moving due to the gate's tension.	infeasible
792	You are tired while swimming and need rest but cannot leave the pool. Available to you are a pool noodle, a paddle board, two inflatable armbands that have small leaks, a large plastic bag and some duct tape. How do you make a temporary raft for rest using these items?	Yes	conventional	Step1: Use duct tape to plug the leaks on the inflatable armbands.<br> Step2: Inflate the armbands and the plastic bag.<br> Step3: Use duct tape to secure the inflated bag onto the paddle board.<br> Step4: Attach the pool noodle and the fixed armbands to the sides of the board using duct tape for extra buoyancy.<br> This creates a makeshift raft to rest on.	inefficient
793	You must clean a leaf-clogged deep pool drain but do not have a pool net. Available to you are a kitchen strainer, a broom handle which is not long enough to reach the bottom, string, duct tape, and a large plastic bag. How could you create a makeshift pool net to solve this problem?	Yes	conventional	Step1: Attach the kitchen strainer to one end of the broom handle using duct tape, creating an extended handle.<br> Step2: Secure the open end of the large plastic bag to the rim of the strainer using more duct tape. <br> Step3: Finally, tie a string to the handle of the broom for added control and, if needed, for retrieving it if it falls into the deep end of the pool.	inefficient
794	You need to make a temporary shade in the pool but don't have an umbrella. Available tools: a large beach towel, two pool noodles, a blow-up beach ball, a length of rope and some clothespins. However, the towel is small and thin which isn't large enough to create a shade that covers the entire pool. How would you create shade using these items?	Yes	conventional	Step1: Inflate the beach ball and attach one end of the rope to it using clothespins. <br> Step2: Pass the two pool noodles through the two ends of the beach towel, forming a makeshift frame for the towel.<br> Step3: Attach the other end of the rope to the towel, again using clothespins.<br> Step4: Let the beach ball float in the pool, thereby suspending the towel above the water and creating a s…	infeasible
795	Your pool's vacuum broke and you must clean the pool floor without it. Available tools: a mop, a dustpan, a brush, a collapsible fishing net, and a pair of tongs. The issue is that the mop's handle is too short to reach the deep end of the pool. How would you clean the pool floor using these items?	Yes	unconventional	Step1: Attach the brush to the collapsible fishing net using the tongs to secure it. <br> Step2: Use this makeshift long-handled broom to dislodge the debris on the pool floor.<br> Step3: Use the dustpan attached to the fishing net to gather and remove debris from pool.	infeasible
797	Your swimsuit top broke and you have to make an emergency repair. Available tools: a beach towel, a shoelace, a safety pin, a rubber band, and a bandana. But, the safety pin is small and the swimsuit material is thick which makes it impossible to secure. How would repair your swimsuit with these items?	Yes	conventional	Step1: Fold the bandana to obtain two triangular halves.<br> Step2: Use the shoelace to thread through the corners of the bandana on the long side.<br> Step3: Attach the bandana to the swimsuit by threading the shoelace through the loops on the broken swimsuit top.<br> Step4: Secure the shoelace by tying it.<br> Step5: Using the rubber band, create additional security for the bandana by looping i…	efficient
798	You need to create a safe area in pool for kids to play but you don't have a pool divider. Tools available: several pool noodles, duct tape, floating rings and floating pool toys. However, the duct tape does not adhere effectively to the wet pool noodles. How would you create a space with these items?	Yes	unconventional	Step1: Use floating rings by stringing pool noodles through them to create a long, rigid barrier. <br> Step2: Further append floating pool toys to the constructed pool noodle and ring barrier for additional stability and visuals to demarcate the safe play area. <br> Step3: Situate the completed barrier into the pool to form the desired safe area.	infeasible
799	You need to retrieve a toy stuck in a pool drain but can't reach it. Available tools: a long pool noodle, a wire coat hanger, duct tape, and a butterfly net. The challenge is that the pool drain is very deep and the coat hanger+net combo is not long enough to reach the toy. How would you recover the toy using these materials?	Yes	unconventional	Step1: Straighten the coat hanger leaving the hook at one end.<br> Step2: Attach the straightened coat hanger tightly to one end of the pool noodle using duct tape.<br> Step3: Attach the butterfly net to the hook of the coat hanger using more duct tape.<br> Step4: Lower the contraption into the pool drain to retrieve the toy.	efficient
800	You need to fix a leak in your inflatable pool float but can't find a patch. Available tools: a piece of duct tape, a piece of plastic bag, a hair blow dryer, and super glue. Regrettably, the blow dryer broke and can't heat up to warm the adhesive. How would you fix the leak using these?	Yes	unconventional	Step 1: Dry the area around the leak.<br> Step 2: Apply super glue on the leak.<br> Step 3: Immediately cover the leak with the piece of the plastic bag and the applied super glue.<br> Step 4: Secure the plastic bag patch using the duct tape, ensuring it is well-sealed and stick.<br> This technique uses the super glue to bond the bag piece and the tape to the pool float, reducing the possibility …	inefficient
801	You need to dry your swimming goggles but have lost your towel. Available to you are a hairdryer, a piece of an old T-shirt, a newspaper, and a socks. The added difficulty is that the hairdryer can't be plugged in anywhere and the old T-shirt is already damp. How would you dry your goggles with these items?	Yes	unconventional	Step1: Remove as much water as possible from the goggles by shaking them or wiping with your hands. Step2: Further dry them off using the newspaper. The paper can absorb water effectively. Step3: Finish drying them using the sock. Socks, especially those made of cotton, are highly absorbent and can help in removing any remaining moisture. The hairdryer and old T-shirt are unusable due to the cons…	efficient
802	You need to repair a tear in your pool cover but don't have a patch. Available tools: a durable plastic bag, duct tape, scissors, and a hairdryer. The obstacle is that the tear is on a curved part of the cover which the rigid plastic bag can't conform to. How would you repair the tear using these materials?	Yes	unconventional	Step1: Cut the plastic bag larger than the tear. <br> Step2: Heat the plastic bag with the hairdryer, making it malleable. This makes it match the curvature of the pool cover. <br> Step3: Tape the heat-molded plastic bag over the tear with duct tape, ensuring full coverage and excellent edges sealing. The hairdryer may also help in activating the adhesive of the tape for better bonding.	efficient
803	You need to freshen up after a swim but there's no shower available. Items available: a bottle of water, a bar of soap, a small towel, and a bottle of moisturizer. However, the only available water is salty ocean water that, when used for washing, may leave your skin and hair feeling grisly, instead of clean. How would you fresh up using these tools?	Yes	conventional	Step1: Wet the small towel with the bottled water. Step2: Use the wet towel to wipe away as much salt and sand from your skin and hair as possible. Step3: Lather the bar of soap in your hands with the remaining bottled water. Step4: Use the soapy hands to wash your body and hair gently. Step5: Use the towel again with the remaining water, if any, to wipe off the soap. Step6: Finally, apply the mo…	efficient
804	You need to carry multiple bags from your shopping spree but don't have a shopping cart or basket. Tools available: a belt, a pair of mismatched short shoelaces, and a tarpaulin. Given that the shoelaces are too short to form a long string, how would you carry all the bags using only these items?	Yes	unconventional	Step1: Arrange all the shopping bags on the tarpaulin. <br> Step2: Tightly gather the edges of the tarpaulin to form resembling a large "bag" with your shopping bags inside.<br> Step3: Using the belt, securely fasten it about the gathered part to keep it together, so it creates a large handle.<br> Step4: Use the shoelaces to tie any loose ends together. <br> Now, the bags can be carried by handli…	infeasible
805	You need to measure a piece of furniture at the store to see if it will fit in your home, but you don't have a tape measure. Tools available: a wallet, a credit card, a pen, and a piece of paper. But the piece of paper is too small to mark all your measurements on, how do you approximate the measurements using these items?	Yes	unconventional	Step1: Use the credit card to measure - approximate the length, width, and height of the furniture in terms of credit card lengths and widths as they're a uniform size (~3.4 inches long and ~2.2 inches wide).<br> Step2: Use the pen to mark those measurements on the piece of paper, one line per credit card length/width. <br> Step3: Use the paper at home to approximate the measurements in a larger …	inefficient
806	You're at a store that has run out of shopping baskets and you need to carry multiple items. Tools available: a scarf, a couple of belts, and a large umbrella. Considering that the scarf is made of thin silk and can't support much weight, how do you create a makeshift shopping basket with these items?	Yes	conventional	Step1: Extend the umbrella fully and tie one belt around the cloth part near the tip, securing it firmly. <br> Step2: Repeat with the second belt near the handle. <br> Step3: Wear the belts over your shoulder, thus creating a hanging basket-like structure with the umbrella. Be sure not to overload it to avoid damaging the umbrella.<br> Step4: Use the scarf to cover items being carried, if needed,…	efficient
808	You need to test the durability of a bag before purchase, but the store doesn't allow unpackaging. Tools available: a small hand-held weight, a flashlight, and a compact mirror. If the bag is made of a dark opaque material which makes the interior invisible, how can you test the durability without opening the bag?	Yes	unconventional	1. Use the flashlight and compact mirror to inspect the exterior of the bag for any visible defects, focusing on the areas that are usually prone to damage such as corners, zippers, and handles. <br> 2. Place the handheld weight on top of the bag to test its ability to hold weight without tearing. <br> 3. Move the weight around various sections of the bag to spot any weak points or sections that …	efficient
809	You want to test if pants fit you in a store which doesn't have a changing room. Tools available: a long scarf, a tight belt, and a pair of your current pants. Given that the belt is too tight to wrap around both pants, how do you figure out if the pants fit?	Yes	unconventional	Step1: Fold the pair of desired pants and your own pants lengthwise.<br> Step2: Use the belt to measure and compare the waistline of both pants.<br> Step3: Use the scarf to measure and compare the length of both pants from waistline to bottom.<br> In each measurement, ensure the belt or scarf is taut for accuracy.<br> In this way, even if the pants do not fit perfectly, you will have a general id…	inefficient
810	The price tag on an item is too high to reach. Tools available: a pen, a roll of duct tape, and an umbrella. If the price tag is located on the store's high ceiling, out of reach for the umbrella, how do you bring down the tag for you to see it?	Yes	conventional	Step1: Unfold the umbrella and attach the pen to its tip using the duct tape.<br> Step2: Use the umbrella with the attached pen to poke at the price tag, causing it to swing or move. This should make the price on the tag visible.	infeasible
811	You're trying to get a large discount for a bulk purchase but the store manager is not around. Tools available: a phone with low battery, WiFi access, and the manager's office door is open. With a drained phone that can't make calls, how do you negotiate the discount?	Yes	conventional	Step1: Connect to the WiFi using your phone. <br> Step2: Use an internet calling service like Skype or Google Hangouts to make a call. <br> Step3: Look for the manager's contact info in their open office. <br> Step4: Use the found information to call the manager by the internet call service via WiFi. <br> Step5: Negotiate your discount over the call.	infeasible
813	You need to carry an antique lamp from a store. Tools available: a backpack, a pair of socks, a t-shirt, and bubble wrap. However, the lamp is too big to fit in the backpack, how do you safely carry the lamp?	Yes	unconventional	Step1: Use the t-shirt to cover the lampshade part, securing it with the socks turned into impromptu ties.<br> Step2: Wrap the rest of the lamp including its base with bubble wrap generously to create a protective layer.<br> Step3: Carry the lamp by holding on to the base, making sure it keeps upright at all times.	inefficient
815	You need to weigh a fruit but the scale at the supermarket is broken. Tools available: a bag of sugar labelled to be 1 kg, an apple, an empty basket. The bag of sugar is vacuum-sealed and rigid. How do you estimate the weight of the fruit?	Yes	conventional	Step1: Hold the sugar bag in one hand and the apple in the other hand to compare their weights. Estimating the weight of the fruit would need you to assume perfect balance to represent exact match in weight with the sugar bag. If the apple feels about half, a quarter, etc of the weight of the sugar bag then assess accordingly. <br> Please note this method provides an estimated weight and would va…	efficient
816	You're doing grocery shopping but forgot to bring your list. Tools available: a smartphone with low battery, limited data, a notepad, a pen. Your phone's battery is critically low, and it dies immediately when you try to use it. How do you recreate your shopping list?	Yes	conventional	Step1: Use your pen and notepad to begin recollecting and jotting down items from your list. <br> Step2: Recall your daily meals and the ingredients involved; put these on the list.<br> Step3: Think about immediate essentials (bread, milk, etc.) and common household items that require regular replacement (toilet paper, dish soap, etc) add these to the list.	efficient
818	You want a particular brand of cereal but it's the last box and is on the highest shelf. Tools available: a mop, a vacuum cleaner and a shopping trolley. The shopping trolley is wobbly due to a broken wheel, and the mop has a short handle. How do you get the cereal box without causing any damage or mess?	Yes	unconventional	Step 1: Position the shopping trolley under the cereal box.<br> Step 2: Extend the vacuum cleaner's tube to its maximum length.<br> Step 3: Use the vacuum cleaner tube to gently push the cereal box off the shelf, it falls into the shopping trolley, mitigating damage.	inefficient
595	5. It's too cold and you need to seal the gaps in the windows, but you don't have any weather stripping. Available tools include: Old clothes, duct tape, pillows, newspaper, plastic wrap, and a hairdryer. The windows are tall and narrow, so it's difficult to reach the top with the available items, and the duct tape does not stick well to the cold window frame. How can you insulate your window wit…	Yes	unconventional	Step1: Crumple up newspaper and stuff it into the gaps around the windows. <br> Step2: Cover the windows with plastic wrap, using duct tape to secure it at the corners. <br> Step3: Use old clothes or pillows at the window sills to block any remaining drafts.<br> Step4: Use the hairdryer to heat and shrink the plastic wrap for added insulation.	inefficient
596	6. Your bed's leg has broken and you need to fix it temporarily. Available tools are: a stack of books, duct tape, a swiffer handle, a pitcher filled with sand, and a yoga mat. The legs of the bed are made of metal and are hollow in the middle, with the top part of the broken leg still attached to the bed, making it impossible to simply stack books or other objects underneath. How can you restore…	Yes	unconventional	Step1: Empty the pitcher and put the swiffer handle in it. Fill it up with sand to make it stable.<br> Step2: Fit the pitcher with the swiffer handle inside into the hollow part of the broken leg.<br> Step3: Use the duct tape to secure the pitcher to the metal bed leg.<br> Step4: If needed, fold the yoga mat and place it under the pitcher for extra stability.	inefficient
597	7. Your curtain rod has fallen and you need to hang your curtains again. Available tools include: a pool noodle, duct tape, a pair of hangers, a broomstick, and fishing line. The windows are tall and the ceiling is too high to reach without a ladder. How can you hang your curtains again?	Yes	unconventional	Step1: Secure the fishing line onto both sides of the curtain.<br> Step2: Thread the pool noodle through the top loop of each curtain.<br> Step3: Attach the hangers to either end of the pool noodle.<br> Step4: Loop duct tape around the top of each hanger, sticky side out.<br> Step5: Using the broomstick, push the pool noodle, curtains, and hangers up to the curtain rod.<br> Step6: The duct tape w…	inefficient
600	10. You are trying to retrieve an earring that fell behind a heavy dresser, but you can't move the dresser. Available tools are: a stick, a chewing gum, a weighty paperclip, dental floss, and a Barbie doll. The earring is studded with tiny jewels which makes it hard for the gum to grip it. How do you get the earring?	Yes	unconventional	Step1: Attach the weighty paperclip to the end of the dental floss to make a small grappling hook.<br> Step2: Use the stick to control the movement of this makeshift fishhook by tying the other end of the dental floss to the stick.<br> Step3: Maneuver the hook behind the dresser using the stick and hook the earring.<br> Step4: Carefully reel in the dental floss, pulling the earring out.	efficient
601	Your hat hanger toppled and you need to hang your array of hats. Available tools include: metal clothes hangers, duct tape, an old wood ladder, and zip ties. However, the wooden ladder has seen better days and cannot support much weight. What's your alternative solution?	Yes	unconventional	Step1: Use the metal clothes hangers to hang hats individually.<br> Step2: Zip tie the handles of the hangers together, creating a chain of hangers.<br> Step3: Duct tape the top hanger in the chain to a sturdy location (like the wall or ceiling).	inefficient
602	One of your drawer handles broke off, and you need to open it. On hand, you have: a fork, a suction cup, a strong magnet, a thick shoelace and a paper clip. The problem is that the drawer is flush with the cabinet, leaving no space to insert a fork or paperclip. How to solve this problem?	Yes	unconventional	Step1: Bend the paperclip into a hook.<br> Step2: Thread the shoelace through the paperclip hook.<br> Step3: Insert the paperclip hook into the keyhole/around the drawer's edge <br> Step4: Pull on the shoelace to open the drawer. <br> Tools: Paperclip and a shoelace.	infeasible
603	You need to hide valuable items in your room from a toddler. Available tools include: a shoebox, an empty DVD case, duct tape, a tall bookshelf, and a decorative pillow. Yet, the toddler is tall enough to reach the items on top of the bookshelf and he's very curious about the decorative pillow. How can you make a secret storage?	Yes	unconventional	Step1: Put the valuable items in the shoebox.<br> Step2: Put the shoebox inside the empty DVD case.<br> Step3: Seal the DVD case closed with the duct tape.<br> Step4: Slide the DVD case with the enclosed shoebox between other DVDs or books on the bookshelf. The DVD case with valuable items should blend in and become less interesting to the toddler.	infeasible
604	You can't find your eyeglasses and it's getting too dark. Available tools include: your smartphone with a very low battery, a birthday candle, a glass of water and a box of matches. The hindrance here is that the birthday candle is very short and cannot provide light for a long period. How do you come up with a solution?	Yes	unconventional	Step1: Use the matches to light the birthday candle. <br> Step2: Now, carefully place this lit candle behind the glass of water. <br> The water will act as a lens, amplifying the light from the birthday candle, helping you find your eyeglasses. <br> Remember to keep an eye on your burning candle and extinguish it as soon as you're done.	efficient
607	You have tomatoes that need support in your garden, but you don't have any garden stakes. Items available: broom handle, twisted coat hanger, duct tape, and feather duster. But, the broom handle is too short to provide the necessary support for the growing tomatoes. How do you create a support structure using these items?	Yes	unconventional	Step1: Straighten the twisted coat hanger.<br> Step2: Tape one end of the coat hanger to the top of the broom handle using duct tape.<br> Step3: After the hanger is secure, you can stabilize the bottom of the broom handle on the ground near the tomatoes.<br> Step4: Lastly, using additional pieces of duct tape, attach the tomatoes to the coat hanger/broom handle structure for support.	inefficient
608	You need to water a tall plant that's hard to reach, but you don't have a watering can with a long neck. Items available: garden hose, large soda bottle, duct tape, and a ladder. However, the garden hose has some small holes, causing water leakage. How will you water the plant using these items?	Yes	unconventional	Step1: Use duct tape to patch up the holes in the garden hose.<br> Step2: Attach the large soda bottle to one end of the hose using more duct tape.<br> Step3: Climb the ladder with the other end of the hose and direct it to the plant.<br> Step4: Pour water into the soda bottle, which would then flow through the hose to water the plant.	infeasible
609	A baby bird has landed in your potted plant and can't get out, but you don't have a bird net. Available items: colander, cooking tongs, shoebox and a towel. The bird, however, is really scared and tends to act aggressively, making it difficult to guide it out. How can you safely get the bird out using these items?	Yes	unconventional	Step1: Place the shoebox near the potted plant.<br> Step2: Use the towel to gently cover the frightened bird, reducing its fear and protect yourself from its beak.<br> Step3: Carefully use the cooking tongs to lift the bird, through the towel, placing it into the shoebox.<br> Step4: Remove the towel from the box and, from a safe distance, allow the bird to fly away. The colander is not required.	efficient
611	You need to transplant a heavy potted plant, but you don't have a dolly. Items available: a skateboard with jammed wheels, a book, an old blanket, and a step ladder. How can you move the plant using these items?	Yes	unconventional	Step1: Lay the old blanket on the ground; <br> Step2: Carefully tilt the heavy potted plant onto the blanket using the step ladder to leverage if needed; <br> Step3: Once the plant is on the blanket, wrap the blanket around the pot securing it with the book; <br> Step4: Then drag the blanket with the attached plant towards the desired location. <br> Tools: Old blanket, step ladder, book.	inefficient
612	You need to protect your garden plants from pests, but don't have a pest spray. Items available: garlic cloves, vinegar, an empty spray bottle with a broken nozzle, and a hand mixer blender. How could you deter pests using these items?	Yes	conventional	Step1: Peel and crush the garlic cloves, using the blender.<br> Step2: Mix the crushed garlic with vinegar.<br> Step3: Place the hole of the broken nozzle directly against the desired plant.<br> Step4: Pour the garlic-vinegar mixture into the spray bottle suspending the nozzle above the plant, and let it drip onto the plant.	efficient
613	A squirrel has been burying nuts in your flower garden and you want to keep it out. Items available: a crochet blanket, a mini wooden fence that only covers a small area, chili powder in limited quantity, and tin cans. How would you keep it away using only these items?	Yes	unconventional	Step1: Using the mini wooden fence, mark the perimeter of the flower garden. <br> Step2: Sprinkle the chili powder along the boundary inside the fence (squirrels detest spicy scents). <br> Step3: Hang tin cans on the fence that make noise when disturbed. <br> Step4: Cover the flower garden with the crochet blanket at night for extra protection. The squirrel will be dissuaded by these deterrents.	inefficient
614	You want to start composting kitchen scraps for your garden, but you don't have a compost bin. Items available: old plastic garbage can, a drill missing its bits, bungee cord cut into short lengths, and packing peanuts. How to create a compost bin with these items?	Yes	unconventional	Step 1: Take the plastic garbage can and drill multiple holes at different levels for air circulation. Tool: nail or sharp tool (since drill bits are missing). <br> Step 2: Place packing peanuts at the bottom to help with drainage. Tool: hands.<br> Step 3: Start adding organic waste and secure the lid with the short bungee cords. Tool: hands. With these steps, you will have a homemade compost bin.	infeasible
615	You need to aerate the soil in your garden, but you don't have a garden fork. Items available: an old umbrella with blunt metal spokes, duct tape, and a plastic kitchen fork. How can you aerate the soil using these items?	Yes	unconventional	Step1: Remove the fabric from the old umbrella to expose the now bare metal spokes.<br> Step2: Reinforce individual spokes with duct tape for added rigidity and durability, this turns the umbrella into a makeshift garden fork.<br> Step3: Use this improvised fork to pierce and turn over the soil, aerating it. If needed, a plastic kitchen fork can be used to aerate smaller, harder-to-reach areas.	inefficient
616	You have a vase of flowers you want to keep fresh, but no flower food. Items available: Sugar, concentrated bleach, aspirin in tablet form, and a teaspoon. How will you keep the flowers fresh using these items?	Yes	unconventional	Step1: Dissolve 1 tablet of aspirin in warm water in the vase to decrease the PH level, thereby increasing water uptake.<br> Step2: Add in 1 teaspoon of sugar to the water, which will serve as food for the flowers.<br> Step3: Add two drops of bleach to the water to keep the water free of bacteria. The flowers should last longer with this treatment.	efficient
617	You have a bag of mulch to spread around your plants, but no gardening gloves. Available items: an old T-shirt full of holes, duct tape, and a small flat spatula. How do you spread the mulch without getting your hands dirty using these items?	Yes	unconventional	Step1: Wrap your hands with the old T-shirt that is full of holes. This provides a basic layer of protection.<br> Step2: Use the duct tape to secure the T-shirt around your hands. This further ensures that the mulch will not get through to your skin.<br> Step3: Use the small flat spatula to scoop and spread the mulch around the plants. This will help control the application of the mulch without g…	inefficient
618	You want to grow plants from cuttings, but don't have rooting hormone. Items available: cinnamon, crusted honey, broken eggshell pieces and, a paintbrush. How to propagate plants using these items?	Yes	unconventional	Step1, dip the cutting in honey, an alternative to rooting hormone. Step2, dust cinnamon, a fungal deterrent, over it using a paintbrush. Step3, plant the cutting into a pot filled with soil and broken eggshell pieces. Eggshells provide necessary calcium for plant growth.	efficient
619	You want to stake your newly planted tree, but don't have tree ties. Items available: short old belts, a thin camping tent pole, and a staple gun. How can you stable your tree using these items?	Yes	unconventional	Step1: Put the camping tent pole vertically alongside the trunk of the tree.<br> Step2: Use the belts to secure the trunk to the pole, with one belt at the top, middle and near the bottom of the trunk.<br> Step3: Staple the ends of the belts to the pole, keeping them tight enough to support the tree but not constrict its growth. Don't staple the belts to the tree itself.	inefficient
620	You need to wash a large quantity of cherry tomatoes but do not have a colander. Available tools include: two same-sized pots with uneven bottoms, a chopping board, a spare t-shirt, a hairdryer, oven gloves, a noisy blender, and an out of battery drill. How can you rinse your tomatoes?	Yes	unconventional	Step1: Place the spare t-shirt in one pot, ensuring it covers the bottom and goes up the sides to create a barrier.<br> Step2: Put the cherry tomatoes in the pot on top of the t-shirt.<br> Step3: Fill the pot with water until the tomatoes are submerged, then gently move them around with your hand to wash them.<br> Step4: Gather the corners of the t-shirt, taking care not to lose any tomatoes, and…	inefficient
621	You want to grate some cheese but don't have a grater. Available tools are an assorted toolbox, a metal colander with very small holes, a wooden spoon, a handheld mixer, a very flexible plastic hair comb, and a tea strainer. You don't have a tool to clean or firm the flexible hair comb. What could act as your makeshift cheese grater?	Yes	unconventional	Step1: Choose the metal colander with very small holes.<br> Step2: Hold the cheese in one hand and the colander in the other.<br> Step3: Rub the cheese against the small holes of the colander. This will make the cheese scrape off in small pieces, simulating the action of a cheese grater.	inefficient
622	You want to strain some pasta but have no strainer or colander. Tools available include: a pair of sunglasses, a baking sheet with holes that are too big, a tennis racket with a cloth wrap, a window screen with too fine mesh, a pincushion, and a decorative wall hanging with geometric cutouts. How can you strain the pasta?	Yes	unconventional	Step1: Lay the tennis racket flat with the cloth side up.<br> Step2: Pour your pasta onto the cloth wrapped tennis racket. The cloth wrap will retain the pasta while allowing the water to go through.<br> Step3: Lift the racket up allowing the water to drain away. Be sure to hold it over a sink or somewhere that can handle the water.<br> Step4: Once the water has drained sufficiently, your pasta s…	efficient
623	You need to roll out a dough, but can't find your rolling pin. Available tools include: a dirty wine bottle that you can't clean, a large flashlight, a glass jar full of pickles also can't be cleaned, a long metal pipe with an irregular surface, a bicycle tire pump, and an old newspaper roll. How do you roll the dough with these limitations?	Yes	unconventional	Step1: Take the large flashlight; make sure it is clean and dry.<br> Step2: Put the dough on a clean surface.<br> Step3: Use the flashlight as if it's the rolling pin to roll the dough. Since a flashlight has a hard cylindrical body, it can be efficiently used for this purpose.	efficient
624	You need to zest a lemon but have no zester or grater. Tools available include: a used nail file with residue on it, a cheese slicer, a too large sharp knife, sandpaper, a toothbrush, and a piece of rough-hewn wood. What tool available helps you zest the lemon?	Yes	unconventional	Step1: Purify the cheese slicer and the too large sharp knife.<br> Step2: Cut small parts of the lemon skin off using the sharp knife without removing the white part of the skin.<br> Step3: Use the cheese slicer to carefully slice thin layers off the cut parts to produce lemon zest.	infeasible
625	You have a corked wine bottle but no corkscrew. Tools available include: a too short pair of paperclips, a hammer with a broken head, a screw that is too short to reach the cork, a plastic bag, a pen, a frying pan, and a hair straightener. With these conditions, how will you open the bottle?	Yes	unconventional	Step1: Use the pen to push the cork down into the bottle. While this doesn't remove the cork, it opens the bottle so that the wine is accessible. Be aware it might cause some wine to splash out, so do it gently. This method is not ideal if you plan to store the wine for later, but it allows you to access it now without a corkscrew.	infeasible
626	You want to whip some cream but your mixer is broken. Tools available include: a cracked jar with a lid, two bent large spoons, a wire hanger, a shoelace, a thermos flask, and a pair of tennis rackets. What will be your substitute to whip the cream?	Yes	unconventional	Step1: Clean the wire hanger thoroughly. <br> Step2: Bend it into a rounded whisk shape, to allow the most surface area for whipping. <br> Step3: Pour your cream into the cleaned out thermos flask. <br> Step4: Insert the DIY wire whisk into the thermos and rapidly move it back and forth to whip your cream. <br> Note: This method may require more time and effort than using a motorized mixer.	efficient
627	You need to melt some chocolate, but your microwave is broken and you don't have a double boiler. Tools available include: a hairdryer, a large spoon, a glass jar, a massive metal salad bowl that cannot get sufficient heat from a small source, a candle, a lighter with no fuel, and a teapot. How would you go about melting the chocolate?	Yes	conventional	Step 1: Cut the chocolate into small pieces using the large spoon.<br> Step 2: Put the chocolate pieces into the glass jar.<br> Step 3: Light the candle using the lighter with no fuel. <br> Step 4: Pour water into the teapot and bring it to boil.<br> Step 5: Once the water boils, carefully place the glass jar filled with chocolate into the teapot, ensuring the water level is below the jar's openi…	infeasible
628	You want to pour pancake batter into the pan, but you lost your measuring ladle. Tools available include: a cracked small cup, a spatula, a cracked large spoon, a too tall wine glass, a funnel, a turkey baster, and a watering can. How do you manage to pour the pancake batter?	Yes	conventional	Step1: Use the spatula to scoop the batter into the funnel. <br> Step2: Hold the funnel above the pan and let the pancake batter flow out into the pan in controlled amounts.	efficient
629	You need to slice apples very finely but have no mandoline slicer. Tools available include: a blunt vegetable peeler, a cream cheese container, a plate, a cheese cutter with a snapped wire, a ruler, a shoehorn, and a pizza cutter. How do you get thin apple slices?	Yes	unconventional	Step1: Use the blunt vegetable peeler to peel off the skin of the apple. <br> Step2: Hold the cheese cutter with the blunt-end forward. <br> Step3: Start slicing the apple thinly with the blunt, smooth side of the cheese cutter using the ruler to ensure uniform thickness. <br> Please note this process might not provide perfectly uniform thin slices and requires extreme care in handling to avoid i…	infeasible
630	You need to core an apple but don't have an apple corer. Tools available include: a cupcake corer, a screwdriver with a head too large to make a small core, a thin strong straw, an old key, a small funnel, and a too shallow melon baller. What can you use to core the apple?	Yes	unconventional	Step1: Use the screwdriver to push it through the top of the apple where the stem is and remove the top part of the core.<br> Step2: Turn the apple upside down and repeat the same action to remove the bottom part of the core.<br> Step3: Use the thin strong straw to remove any remaining parts of the core.<br> Step4: Clean out any leftover seeds or stem by shaking the apple or using the old key to …	infeasible
631	You need to open a beer bottle but don't have a bottle opener. Tools available include: a metal spoon, a hardcover book, a bracelet, a door hinge, a lighter, a belt buckle, and a key. However, the spoon is made of thin, soft metal, the lighter is almost out of fuel and could explode with heat or pressure, and the door hinge is round. How to open the beer bottle?	Yes	unconventional	Step 1: Hold the neck of the beer bottle tightly with one hand.<br> Step 2: Take the key and wedge it under the cap lip.<br> Step 3: Firmly holding onto the key and the bottle neck, use the edge of the hardcover book as a lever.<br> Step 4: Press downwards on the key to pry off the cap.	inefficient
632	You need to skin tomatoes, but you don't have a boiler to blanch them. Tools available include: a hairdryer, a cheese grater, a knife, a pile of hot rocks, a kitchen toaster, a glass jar and a tea kettle. But the kettle has a tiny hole and cannot hold boiling water, the knife is dull and the cheese grater has large holes. How to skin the tomatoes?	Yes	unconventional	Step1: Fill the tea kettle with water.<br> Step2: Bring the kettle close to the toaster, being cautious not to have any direct contact.<br> Step3: Switch on the toaster, the heat produced will heat up the kettle's water.<br> Step4: Place tomatoes in the glass jar.<br> Step5: Carefully pour the hot water from the kettle into the glass jar.<br> Step6: After a few minutes, remove tomatoes from the j…	infeasible
633	You need to drain the oil from a can of tuna but don't have a strainer. Tools available include: a fork, a pot lid, a coffee filter, a tea strainer, a sifter, a squeeze bottle, and a hole puncher. Nevertheless, the hole puncher is too big for the can, and the coffee filter is extra thick and doesn't let oil through. How to drain the oil?	Yes	unconventional	Step1: Open the tuna can with the fork.<br> Step2: Hold the tea strainer over the pot.<br> Step3: Pour the contents of the can into the tea strainer letting the oil drain into the pot.<br> Step4: Use the fork to press the tuna in the strainer to squeeze out any additional oil.	inefficient
634	You need to tenderize meat but can't find your meat mallet. Available tools include: a tin can, a rolling pin, a rubber hammer, a sturdy glass bottle, a metal water bottle, a pestle, and a thick hardcover book. However, the rolling pin is made of thin and light glass, the pestle is made of soft wood and the glass bottle is full of liquid and sealed. How can you tenderize the meat?	Yes	unconventional	Step1: Use the thick hardcover book to flatten the meat by hitting it multiple times, this will start the tenderizing process. <br> Step2: After the meat is somewhat flattened, further tenderize it by using the rubber hammer that can mimic the action of a regular meat mallet. <br> Step3: If more tenderizing is needed, you could also use the metal water bottle and a tin can - they are sturdy and w…	inefficient
635	You're camping and you need to secure a line for your tarp but you can't find your tent pegs. Tools available: sticks, a large metal spoon, paracord, a rock, hiking poles, and the drawstring from a sweatshirt. The ground is solid rock and the stick is thin and brittle. How can you create a makeshift peg and secure the line using only these items?	Yes	conventional	Step1: Tie one end of the paracord to the top of one hiking pole. <br> Step2: Use the other end of the paracord to tie a loop. <br> Step3: Put a rock into the loop and wrap the rest of the paracord firmly around the rock. <br> Step4: Feed the drawstring through the loops of your tarp and tie it securely around the hiking pole. <br> Step5: Position the pole with the rock at the base against the gr…	inefficient
636	You've got a pot of uncooked rice at the campsite, but you don't have a strainer for rinsing it. Tools available: coffee filters, metal camping mug, twigs, toothpicks, aluminum foil, and rubber bands. However, the aluminum foil is thin and tears easily, and the rubber bands are dry and break with minimal stretch. How to wash the rice without losing it in the process using only these items?	Yes	conventional	Step1: Lay the coffee filter over the camping mug. Step2: Pour the rice into the mug/filter. Step3: Pour water from above, allowing it to pass through the rice and then the filter, draining into the mug. Step4: Lift the filter and rice after washing, let remaining water drain from underneath. <br> Tools: Coffee filters, metal camping mug.	inefficient
637	You're on a hiking trail and realize your water bottle cap is broken. Tools at disposal: leaf, a piece of plastic bag, string from your backpack, duct tape, aluminum foil, and a bandana. The duct tape is old and has lost its stickiness and the plastic bag is full of holes. How can you make a makeshift cap to prevent your water from leaking out?	Yes	unconventional	Step 1: Mold the aluminum foil over the opening of the water bottle to form a cap.<br> Step 2: Secure the foil cap to the bottle with the string from your backpack.<br> Step 3: Use the bandana to cover and hold the foil cap down tightly, tying it around the bottle.	inefficient
638	You need to sharpen a tiny knife and you don't have a whetstone. Tools available: a leather belt, a rough edge of a stone, a metal thermos, nail file, and a steel fork. However, the stone is incredibly smooth and the nail file is made of soft plastic. How can you sharpen your knife with only these items?	Yes	conventional	Step1: Use the rough edge of the stone to sharpen the knife, making sure to maintain the correct angle and sharpen both sides.<br> Step2: Use the leather belt to strop the knife, sliding the blade along the belt to hone the edge further and remove any burrs.<br> Step3: If necessary, the rough edge of the thermos can be used for additional honing, followed by another session with the leather belt.…	inefficient
640	You're camping and need to cook a soup, but you forgot your ladle. Tools available: an empty can, a stick, duct tape, a metal spatula, and a roll of aluminum foil. But the duct tape has lost its adhesive quality, the stick is thin and not sturdy and the aluminum foil is very thin and easily torn. How can you create a makeshift ladle with these items?	Yes	unconventional	Step1: Shape the spatula into a scoop-like form. <br> Step2: Use the empty can to create a handle - cut it vertically into a long strip and bend it around the handle of the spatula. <br> Step3: Insert the thin stick for additional support inside the can handle. See if the stick gives the handle more sturdiness. <br> Caution: Be careful while manipulating the can to not get cut. <br>	infeasible
641	You're hiking in wet weather and your boots lack enough grip. Tools available: shoelaces, an old tire tube, small stones, duct tape, and a few screws. The old tire tube is heavily damaged with lots of tears. How can you increase the grip of your boots using only these items?	Yes	unconventional	Step1: Cut out strips from the tire tube.<br> Step2: Wrap the strips around the soles of the boots, ensuring to cover the entire surface.<br> Step3: Secure the tire strip in place using shoelaces, weaving them in and out of the boot grooves.<br> Step4: Add extra secureness by wrapping duct tape around the sole, covering the shoelaces.<br> Step5: Embed small stones and screws into the duct tape fo…	inefficient
642	A mesh screen of your tent got torn. You need to repair it to prevent bugs. Tools available: dental floss, sewing needle, duct tape, small plastic squares from packaging, and elastic bands. The hole in the mesh screen is the size of a basketball. How can you fix the hole using only these items?	Yes	unconventional	Step1: Cut a piece of the plastic square bigger than the hole. <br> Step2: Secure it over the hole using the duct tape, ensuring all edges are well sealed. <br> Step3: To give added strength, sew through the plastic and screen mesh along the edges of the hole using the needle and dental floss. <br> Step4: Ensure the knots are on the outside of the tent to retain waterproofing. The elastic bands m…	efficient
643	You need to make a small raft to cross a shallow river and you have only logs and ropes. Tools available: camping shovel, camping knife, and a tarp. The ropes are frayed and fragile, easily breaking under stress. How can you construct a makeshift raft using these items?	Yes	unconventional	Step1: Using the camping knife, cut the logs you've into similar lengths. Step2: Lay them side by side on top of the tarp. Step3: Thread the fragile ropes between the logs, tightening them as much as feasible without breaking. Step4: Now, fold the tarp's corners over, securing them together using the camping shovel, essentially creating a hold for the logs. Done! Your logs are bound together and …	inefficient
644	You're on a hike and your jacket zipper is stuck. Tools at disposal: a lip balm, a piece of wire, a needle, and a small pliers. The zipper is missing some teeth and is rusted. How can you unblock your jacket's zipper using only these items?	Yes	unconventional	Step 1: Use the needle to pick off any visible rust on the zipper and in the slider. <br> Step 2: Use the pliers to straighten the zipper teeth as far as possible. <br> Step 3: Apply lip balm on the zipper to lubricate it, this will allow the zipper pull to move more smoothly. <br> Step 4: Slowly and carefully, move the pull up and down the track until the zipper comes unstuck. If necessary, use …	inefficient
645	You need to signal for help in a remote area but you lost your flare gun. Tools available: a mirror, flashlight, mobile phone, aluminum foil, and whistle. The battery in the flashlight and mobile phone is dead. How can you signal for help using only these items?	Yes	conventional	Step1: Use the whistle to make noise; this may attract attention if someone is within audible range. <br> Step2: The mirror can be used to reflect sunlight as a signal during the day. <br> Step3: Use aluminum foil to create a large reflective surface to catch attention from afar. <br> Step4: Continue with the whistle and reflective signals until help arrives. The mobile phone and flashlight are c…	inefficient
646	You need to boil water but forgot the pot at home. Tools available: aluminum foil, stones, firewood, small steel plate, and tree bark. The weather is too windy and/or rainy to light a fire. How can you boil the water using only these items?	Yes	conventional	Step 1: Dig a hole in the ground. Place small steel plate at the bottom.<br> Step 2: Pile stones around the hole to protect from the wind.<br> Step 3: Put firewood on the steel plate and use the tree bark for kindling to light the fire.<br> Step 4: Form a bowl shape with the aluminum foil. Fill it with water and place it over the fire.<br> Step 5: Keep it there until the water boils. <br> The wea…	efficient
647	Backpack buckle got broken and you need to keep your items secure. Tools available: shoelace, carabiner, duct tape, safety pins, and rubber bands. The backpack is overstuffed, causing serious strain on the single shoulder strap. How can you keep your backpack closed using only these items?	Yes	conventional	Step1: Use the shoelace to thread through the backpack's zipper loops and tie a secure knot to keep the backpack closed. Step2: Bundle up any loose ends with rubber bands to prevent snagging and tripping. Step3: Use the carabiner to clip the two shoulder straps together to evenly distribute the weight of the load. Step4: For added security, wrap duct tape around critical points like zippers and k…	inefficient
648	You've bought a new canvas painting, but don't have any hooks to hang it up. Availability: Fishing line, duct tape, corkboard thumbtacks, a yardstick, a chair, a couple of textbooks, and a ceramic teapot. The painting is too heavy to hang on a fishing line. How do you hang the painting using only these items?	Yes	conventional	Step1: Use the yardstick to measure a suitable height on the wall.<br> Step2: Apply strips of duct tape onto the back of the canvas.<br> Step3: Press the canvas firmly against the wall, using the yardstick's measurement as guidance.<br> Extra Step (if needed): Use the textbooks and chair for extra support in case the duct tape doesn't hold the painting.	infeasible
649	A 1000-piece puzzle has scattered on your hard-to-reach attic floor. Available tools: plastic bags, a mop with an adjustable handle, vacuum cleaner with no bag, duct tape, an empty laundry basket, some wooden clothespins, and a large cardboard box. The mop handle does not extend to the corners of the attic. How can you collect all the pieces without manually picking them up?	Yes	unconventional	Step1: Use the mop to push all puzzle pieces towards the center of the attic.<br> Step2: Secure a plastic bag onto the vacuum cleaner's hose using the duct tape to catch the puzzle pieces.<br> Step3: Turn on the vacuum cleaner and start collecting puzzle pieces.<br> Step4: If some pieces remain near corners, use clothespins to extend the reach of the mop, then repeat Step2 and Step3.<br> Step5: T…	inefficient
650	There is a pesky spider hanging high from the ceiling and you want to remove it without killing it. Tools at disposal: a plastic container, a broomstick, a roll of sticky tape, an unused pizza box, a desperation jar, a mop, a straw hat, and a small step ladder. The ceiling where the spider is hanging is arched and too high for the broomstick to reach. How could you solve this problem without kill…	Yes	unconventional	Step1: Position the step ladder underneath the spider. <br> Step2: Carefully climb the ladder. <br> Step3: Using the plastic container, gently capture the spider without squishing it. <br> Step4: Slowly bring down the container to avoid harming the spider.<br> Step5: Cover the container with the pizza box to secure the spider inside.<br> Step6: Safely release the spider outside.	infeasible
652	2. The window in your bedroom has jammed and won't open, and it's getting stuffy. Your tools: a shoehorn, a sturdy hairbrush, a squirt bottle of water, a bottle of olive oil, a roll of duct tape, a butter knife, a bookmark, and a pair of rubber gloves. The window is a sliding type, and the hairbrush handle can't fit into the gap. What is the solution?	Yes	unconventional	Step1: Put on the rubber gloves for safety and grip.<br> Step2: Apply some olive oil along the window tracks using the butter knife, to lubricate them and make the window slide more easily.<br> Step3: Insert the edge of the shoehorn into the small gap of the window and try to leverage it upwards to open.<br> Step4: If the window still doesn't budge, apply some more olive oil and try again. The wa…	inefficient
653	3. The door to your storage room has swollen due to high humidity and won't budge. Availability: a hairdryer, some wax paper, a rubber mallet, a chisel, a towel, a floor rug, a shoebox, and a roll of waxed dental floss. The door hinge is rusted, so just treating the door may not help. How can you open the door using these items?	Yes	conventional	Step1: Use the chisel and rubber mallet to remove the rust from the door hinge, also creating a small gap between the door and the frame. Step2: Place the wax paper around the swollen parts of the door. Step3: Apply heat using a hairdryer to the swollen parts of the door, making the door shrink a little. Step4: If the door is still not budging, use the rubber mallet to gently knock it open. The w…	inefficient
654	4. You accidentally dropped your gold ring in a tiny narrow gap between your wooden floorboards. At disposal: a magnet, a shoelace, a strip of duct tape, a thin notebook, a hairdryer, a fine paintbrush, a piece of gum, and some twine. The flooring is rough and the gap between the boards is really narrow and deep. What's the resolution?	Yes	unconventional	Step1: Attach the magnet to the strip of duct tape.<br> Step2: Attach the other end of the duct tape to the shoelace.<br> Step3: Lower the magnet attached to the shoelace into the gap between the floorboards.<br> Step4: Once the magnet is in contact with the gold ring, lift the shoelace up to retrieve the ring. <br> Note: Despite gold being non-magnetic, it will be affected by the magnetic field …	infeasible
655	5. Your favorite novels keep falling forward on your bookshelf and you have no bookends to hold them up. Tools available: a pair of wooden picture frames, a large soup can, several hardcover books, a tall drinking glass, a block of modeling clay, a candle, and a sturdy box. The bookshelf has an open design, and all sides are exposed. What can be a makeshift solution?	Yes	unconventional	Step1: Clean the area of bookshelf where the books are kept. <br> Step2: Use the sturdy box as one bookend on one side of the books.<br> Step3: For the other side, flip the soup can so that it's lying horizontally and use it as an alternative for a bookend. <br> This solution will help contain the books and prevent them from falling over again.	efficient
656	6. A button on your shirt fell off and you need to sew it but your sewing kit is missing. Available tools: Dental floss, a small nail, a stapler, a pair of scissors, a cupcake liner, a paper clip, a strip of adhesive tape, and a needle from a pine tree. The button is of a special locking type, and can't be easily sewn back on. How would you reattach the button?	Yes	unconventional	Step1: Thread the dental floss through the eye of the pine needle, making a strong, durable thread.<br> Step2: Use the small nail to make holes in the fabric where the button fell off. <br> Step3: Thread the needle and floss through the holes in the button and fabric, securing it in place. <br> Step4: Cut off any excess floss with the scissors.<br>	efficient
657	7. You need to iron your wrinkled pants, but your iron is not working. Tools available: a kettle with hot water, a smooth glass bottle, a hair straightener, a towel, a heavy textbook, a roll of wax paper, a flat wooden cooking spatula, and some water in a spray bottle. The pants are made of a delicate material that can't be wetted or heated directly. How to press your pants with these tools?	Yes	unconventional	Step1: Place the towel on a flat surface.<br> Step2: Lay the pants on the towel.<br> Step3: Put the wax paper over the pants to protect the fabric.<br> Step4: Heat the glass bottle with hot water from the kettle.<br> Step5: Roll the hot bottle over the wax paper, using the heavy textbook as a weight if necessary.<br> Step6: Release the pressure and remove the bottle.<br> Step7: Remove the wax pap…	inefficient
658	8. Your new rug keeps slipping on your wooden floor. You have no anti-slip liner. Your tools include: a roll of double-sided tape, some newspaper, a few rubber bands, bottle corks, a yoga mat, a pair of old socks, a packet of paper clips, and a bag of rice. The floor is of a material that double-sided tape doesn't adhere to well. How will you prevent the rug from slipping?	Yes	unconventional	Step1: Unroll the yoga mat across the floor where you will place the rug.<br> Step2: Place the rug over the yoga mat. The rubber texture of the yoga mat will help grip the rug and keep it secure.<br> Step3: For additional support, place the old socks filled with rice at each corner under the rug. The weight will further help reduce slipping.	inefficient
659	9. You have a squeaky wooden floorboard in your bedroom. Your tools: a bar of soap, a handful of coins, a tube of superglue, a poker card, several sheets of newspaper, a bottle of talcum powder, a roll of double-sided tape, and a serving spoon. The floorboard can't be lifted to apply the talcum powder or soap underneath. How could you silence the floorboard?	Yes	unconventional	Step1: Use the serving spoon to spread a thin line of superglue along the sides of the squeaky floorboard.<br> Step2: Quickly, before the superglue dries, press the double-sided tape along the same path, ensuring it adheres securely.<br> Step3: Sprinkle the coins evenly along the tape, distributing the weight across the entire length of the board.<br> This should create a gentle weight distributi…	infeasible
660	10. You need to remove a stuck sink plug in your bathroom. Your tools: dental floss, a toothpick, a rubber glove, a wire clothes hanger, a drinking straw, a dish sponge, a thin plastic card, and a safety pin. The drain is offset and has a curve, preventing the hanger access directly to the sink plug. How will you unblock the sink?	Yes	unconventional	Step1: Put on the rubber glove for safety and better grip. <br> Step2: Bend the wire hanger to create a hook at one end. <br> Step3: Insert the plastic card at one side of the plug to loosen it a bit.<br> Step4: Secure the dental floss onto the toothpick and feed the toothpick into the hole made by the plastic card.<br> Step5: Use the wire hanger to loop the string around the plug and pull it upw…	inefficient
661	You need to study after sunset and your roommate is sleeping. The only light source is the main room light which is too bright. The available items include a flashlight, wax paper that is too flimsy, and a roll of tape. How would you create a reading lamp?	Yes	unconventional	Step1: Get the flashlight and the roll of tape.<br> Step2: Use the tape to secure the flashlight, with the light facing upwards, to a table or a vertical surface.<br> Step3: Take the wax paper and attach it over the top of the flashlight using the tape. This will diffuse the light creating a softer light effect suitable for reading, minimizing the disturbance to your roommate.	inefficient
662	You need to scrap off some dried paint from your wooden desk without ruining the wood. Items available: a plastic spoon, a coin, a hairdryer that only blows cold air, and an old toothbrush. How would you proceed?	Yes	unconventional	Step1: Use the hairdryer to blow cold air on the dried paint. This might help in cracking or loosening it up. <br> Step2: Use the plastic spoon's edge to carefully scrape off the loosened paint. Be careful not to scratch the wood. <br> Step3: Once most of the paint is removed, use the old toothbrush to brush off any leftover paint particles.	inefficient
663	You need to copy notes from an oversized book which doesn't fit on your desk. Available items: two dining chairs, a broomstick that is not long enough, a roll of tape, and some clothes hangers. How could you set-up a stand for your book?	Yes	unconventional	Step1: Place the two dining chairs next to each other with a small space in between.<br> Step2: Place the broomstick across the tops of the two chairs so that it goes over the space between them.<br> Step3: Use the tape to secure the broomstick on the chairs.<br> Step4: Position the oversized book on the broomstick to lean against the backrests of the chairs.<br> Step5: Use clothes hangers to hol…	inefficient
665	You need to hang a poster on your dorm room wall, but you have no hammer or nails. Available tools are: sticky tape, a shoe, a hardcover book, a roll of duct tape, and a belt. But the dorm room wall is made of rough brick. How can you hang the poster?	Yes	conventional	Step1: Clean the area where you plan to hang the poster.<br> Step2: Apply a decent amount of duct tape to the back of the poster corners and edges.<br> Step3: Press the poster against the brick wall, ensuring the duct tape sticks well to the rough surface.<br> Tools used: Duct tape.	efficient
666	You need to divide a poster board equally into three portions, but you don't have a ruler. Available items: a pencil, one sheet of A4 paper that is crumpled, and a shoe. How would you measure and divide the poster board?	Yes	conventional	Step1: Flatten out the crumpled A4 paper as best as you can.<br> Step2: Fold the A4 paper into three equal parts, using the pencil to mark and crease the folds.<br> Step3: Align the folded paper's edge with the edge of the poster board.<br> Step4: Use the pencil to mark out the divisions based on the folds of the A4 paper on the poster board.<br> Step5: Use the shoe's edge to create a crease on t…	inefficient
667	You spilled water on your laptop keyboard and need to dry it out without causing further damage. Available items: a hairdryer, a pack of rice that's not enough for a laptop, a towel, and a vacuum cleaner. How would you proceed?	Yes	conventional	Step1: Turn off the laptop immediately to prevent short-circuiting. <br> Step2: Pat dry the laptop keyboard with the towel to remove surface moisture.<br> Step3: Use the vacuum cleaner set at a low power to draw out any water seeped in.<br> Step4: Leave the laptop in a warm but not too hot place to dry naturally. Avoid using the hairdryer as the high heat can damage internal components.	infeasible
668	The door to your dorm room keeps swinging open due to a faulty spring. You have a pair of shoes, a heavy textbook that keeps sliding on the tiled floor, a bungee cord, and a pack of gum. How can you keep the door closed?	Yes	unconventional	Step1: Tie one end of the bungee cord to the door handle. <br> Step2: Wrap the other end of the cord around the heavy textbook. <br> Step3: Position the textbook as far away from the door as possible, so the bungee cord is stretched out and pulling the door closed. <br> Step4: Use the piece of gum to increase the traction under the textbook and prevent it from sliding. <br> Step5: Use your shoes …	infeasible
669	You need to amplify the audio coming from your smartphone's speakers to share a recording with your study group. Available items: a plastic cup that is too narrow, a paper towel tube, a pen, and a cardbox. How can you amplify the sound?	Yes	unconventional	Step1: Trim one end of the paper towel tube to make a slot wide and long enough to stand your phone. <br> Step2: Place your smartphone in the slot with the speaker facing into the tube. <br> Step3: Place the other end of the tube in the cardboard box to act as a resonating chamber. The sound from your smartphone should now be amplified.	inefficient
670	You need to write on a whiteboard but have no whiteboard markers. Available items: a permanent marker, a bottle of nail polish remover, a cloth that is not absorbant, and a pencil. How would you write on and erase the board?	Yes	unconventional	Step1: Use the permanent marker to write on the whiteboard. <br> Step2: To erase, pour some nail polish remover on the cloth.<br> Step3: Use the soaked cloth to wipe the permanent marker off the whiteboard. Nail polish remover contains acetone, which breaks down the ink of the permanent marker, allowing for erasure.	efficient
671	You need to secure your poster presentation without any pins. Tools available: chewing gum, a roll of tape that is almost out of tape with only a few inches left, a stapler without staples, and a pair of scissors. How will you secure your posters?	Yes	unconventional	Step1: Use the scissors to cut the tape into smaller pieces.<br> Step2: Use the small pieces of tape to initially secure the corners of the poster.<br> Step3: Chew the gum and use it to further secure the poster corners or edges where needed.<br> Tools used: Tape, Scissors, and Chewing Gum.	inefficient
672	You need to study for biology and can't remember the anatomy of a plant cell. Available items: pieces of felt and spare fabric, but they all in the same color, scissors, and a hot glue gun. How could you create a tactile study tool from these items?	Yes	conventional	Step1: Cut out the general shape of a plant cell from the felt to make the basis of the model.<br> Step2: Use the same fabric to cut separate shapes representing the various parts of a plant cell, such as the nucleus, chloroplasts, mitochondria, endoplasmic reticulum etc.<br> Step3: Arrange these pieces on the cell base and use the hot glue gun to attach them.<br> Step4: With a pen, label each pa…	inefficient
673	You need to suspend a light object in your dorm room as part of a physics project, but you don't have any string. Available items: shoelaces, a phone charger cable, dental floss, and masking tape. The attachment points are too high to stand without using something. How would you suspend the object?	Yes	unconventional	Step1: Unroll a length of dental floss sufficient to reach the attachment points. <br> Step2: Tie one end of the floss around the object. <br> Step3: Stick a piece of masking tape on the other end of the floss, and throw it over the attachment points. <br> Step4: Once in place, use additional masking tape to secure it firmly. If necessary, use shoelaces or the phone charger cable to add support.<…	efficient
674	The heating in your dorm has stopped working and it's a cold night. You need to warm up without a heater. Available items: a leaking hot water bottle, a low power hairdryer, a woolen blanket, and an aluminium foil. How will you create warmth?	Yes	unconventional	Step1: Fill the leaking hot water bottle with warm water.<br> Step2: Use hairdryer to dry the leaking water and warm the woolen blanket.<br> Step3: Wrap the woolen blanket around you.<br> Step4: Wrap the aluminium foil over the blanket, shiny side facing in. <br> This will ensure any body heat is reflected back, while hot water bottle and warmed blanket provides you extra warmth.	infeasible
675	You accidentally printed an assignment on both sides and need to blank out the unwanted page. Available items: a bottle of correction fluid that has dried up, painting tape, glossy printing paper that isn't compatible with the glue stick, and an unusable glue stick. How would you fix the assignment?	Yes	conventional	Step 1: Take the glossy printing paper and tape it onto the unwanted printed page using painting tape.<br> Tools: Glossy printing paper and painting tape.	efficient
677	After a long day out you arrive back at your hotel room and realize the door seal is broken, letting cold air in. Available tools: a bath towel, duct tape, a hairdryer, newspaper, a shower cap, a clothes hanger, a tube of toothpaste, and a pair of socks. The door break is along the bottom of the door and the draft is strong enough to move the towel or newspaper. How do you fix the draft with only…	Yes	unconventional	Step1: Roll the bath towel into a "snake" shape. <br> Step2: Apply duct tape on one side of the towel to make it heavier and make sure the draft cannot move the towel away. <br> Step3: Push the towel against the door crack at the bottom and adjust it until the draft is minimized. <br> Step4: For a more secure seal, add more duct tape to fix the towel to the door and floor. Tools used: Bath towel,…	efficient
678	The lighting in your hotel room is too dull to read a book. Available tools: a smartphone with flash that is nearly dead, aluminum foil, a glass cup, a compact mirror, room service tray, a white napkin, a champagne bottle, and a box of matches. How can you create more light using only these items?	Yes	unconventional	Step1: Use matches to light up the room initially. <br> Step2: Wrap the aluminum foil around the room service tray. This will act as a great reflector.<br> Step3: Set the smartphone flashlight to flash on the aluminum foil to reflect light around the room.<br> Step4: In addition to it, the champagne bottle can be filled with water and placed where the light needs to be concentrated the most. The …	inefficient
681	You want to cool your soda but there is no fridge or ice bucket in the room. Available tools: a bathroom sink, a shower cap, a wet towel, tap water, an empty garbage bin, a hairdryer, a bottle of water, and a bar of soap. However, the garbage bin has multiple holes in the bottom. Now, how can you chill your soda using only these items?	Yes	unconventional	Step1: Fill the sink with tap water. <br> Step2: Wet the towel with cold water. <br> Step3: Wrap your soda with the wet towel. <br> Step4: Submerge the towel-wrapped soda into the water in the sink. <br> The process of evaporation will cool the soda can. This is because when water (from the towel) evaporates, it draws heat away from the soda can, thus cooling it.	inefficient
682	The hotel room's curtains won't close fully, and you need complete darkness to sleep. Available tools: a chair, a bathrobe, a pair of shoes, a laundry bag, a hair clip, a tie, a pair of socks, and a box of breakfast cereal. Notice that the tie and bathrobe belt are too short for any use, and there are no hooks or rings in the curtain. How can you now fully close the curtains using only these item…	Yes	conventional	Step1: Unlace the shoes and use the laces to tie the bathrobe around the middle of the curtains tightly.<br> Step2: Fill the laundry bag with the breakfast cereal box and some shoes to give it weight.<br> Step3: Tie the other ends of the shoelaces to the handles of the weighted laundry bag. The weight of the bag will pull the curtains closed.	infeasible
683	You suspect that your hotel room has bed bugs. Available tools: a flashlight, a white bedsheet, a hairdryer, a magnifying glass, clear tape, a toothpick, a bottle of perfume, and a Thermos with hot water. The issue is, the flashlight doesn't have batteries and the hairdryer only works in cold mode. How can you detect their presence using only these items?	Yes	unconventional	Step1: Spread the bedsheet over a flat, light-colored surface. <br> Step2: Use the magnifying glass to carefully inspect areas where the bugs are most likely to hide, including the edges and seams of the mattress, bed frame, and headboard. <br> Step3: If you see a tiny dark bug, use the tip of the toothpick to pick it up, then secure it with clear tape. <br> Step4: If unsure, pour a bit of hot wa…	efficient
684	You want to heat your leftover pizza but there is no microwave in the room. Available tools: a hairdryer, an iron, a foil sheet, a coffee pot, an electric kettle, a tea bag, a hotel room robe, and an alarm clock. The problem is that the iron doesn't heat up. How to heat the pizza using these items only?	Yes	conventional	Step1: Fill the electric kettle with water and let it heat up.<br> Step2: Wrap the pizza slices fully in the foil sheet.<br> Step3: Once the water is boiled, carefully put the foil-wrapped pizza on top of the electric kettle. Use the hotel room robe if necessary to handle the hot kettle.<br> Step4: Leave it there for few minutes and heat will transfer from the hot water to the pizza through foil.	efficient
685	You accidentally spilled wine on the hotel's white carpet. Available tools: a disposable coffee filter, white vinegar, a hairdryer, a spoon, a dish soap bottle, toothpaste, a cotton towel, and a coffee pot. Unfortunately, the vinegar is too diluted, and the material of the carpet doesn't absorb liquids well. How can you clean the wine stain using only these tools?	Yes	unconventional	Step1: Blot the stain with the cotton towel to absorb as much wine as possible.<br> Step2: Mix a small amount of dish soap with warm water in the coffee pot.<br> Step3: Use the coffee filter to apply the soap mixture to the stain.<br> Step4: Use the spoon to gently rub the mixture into the stain.<br> Step5: Blot with the towel to absorb the soap mixture and any lifted wine.<br> Step6: Repeat step…	inefficient
687	You want to secure your hotel room as you are skeptical about the door lock. Available tools: a disposable fork, a clothes hanger, a chair, rubber bands, a belt, a metallic water bottle, a luggage strap, and a heavy bath towel. The challenge is that the door opens outward, not inward, and the belt is too short to serve any purpose. How can you secure the door using these items only?	Yes	unconventional	Step1: Loop the luggage strap around the door handle. <br> Step2: Attach the metal water bottle to the end of the strap. <br> Step3: Place the chair in a position where the strap is taut and the water bottle is held off the ground.<br> Step4: Use the heavy towel draped over the chair to prevent the water bottle from clearing the top of the chair when the door is pushed, creating a rudimentary, gr…	infeasible
566	Your cat is stuck in a tall tree and refuses to come down. Available tools: ladder (not tall enough), broomstick, a string of yarn, your child's remote control helicopter, an empty pillowcase, and a canned sardine. Sadly, the range of your child's remote control helicopter falls short of where your cat is situated. How do you coax your cat down using only these items?	Yes	unconventional	Step1: Open the canned sardine, the smell might attract the cat's attention.<br> Step2: Tie the sardine to the string of yarn.<br> Step3: Securely tie the other end of the yarn to the broomstick. <br> Step4: Climb as high as possible on the ladder while waving the broomstick with the sardine in the air to lure your cat into reaching or jumping down. If the cat is unresponsive, leave the sardine i…	inefficient
567	You have to feed your pet fish but its food has dropped behind a heavy cabinet. Available items: Rubber gloves, skewers, masking tape, a magazine, a hand fan, a wall mirror and a bag of marshmallows. The gap between the cabinet and the wall is too narrow for the skewers to pass through. How do you retrieve the fish food using these items?	Yes	unconventional	Step1: Put on the rubber gloves for protection and to increase your grip. <br> Step2: Roll the magazine tightly and secure it with masking tape. <br> Step3: Use the tightly rolled magazine to reach behind the cabinet and move the fish food closer to the edge of the cabinet.<br> Step4: Use the hand fan to create a gust of wind that could potentially push the fish food out from behind the cabinet.	infeasible
568	You need to clean your dog's teeth, but the dog toothbrush is lost. Available items: a piece of cloth, toothpaste, a normal toothbrush, a matchstick, a turkey baster, and a piece of rope. Your dog is extremely scared of any hard or large objects being put in its mouth. How do you create a makeshift dog toothbrush using these items?	Yes	unconventional	Step1: Apply toothpaste onto the piece of cloth. <br> Step2: Wrap the cloth around your finger to make a soft and safe brush. <br> Step3: Gently brush your dog's teeth with the cloth-wrapped finger ensuring you reach all corners. Tools used: Cloth, toothpaste.	inefficient
569	Your hamster has escaped and you need to trap it safely. Your available tools include a box, a few tubes of wrapping paper, a pack of sunflower seeds, a fly swatter, and a ball of yarn. Recently, the hamster found a hole in the wall and now uses it as a hideout. How can you trap your hamster using these items?	Yes	unconventional	Step1: Use tubes of wrapping paper to create a tunnel starting from the hole in the wall. <br> Step2: At the end of the tunnel, place the box with the open side up. <br> Step3: Lure the hamster into this trap using the sunflower seeds by placing them inside the box and along the tunnel.<br> Step4: Watch from a safe distance. Once the hamster goes into the box, approach slowly and cover it with th…	infeasible
570	You need to clip your cat's nails but you've misplaced the nail clippers. Available tools: sandpaper, a thick towel, small scissors, adhesive tape, a thick book and a hair tie. Your cat panics and becomes extremely agitated when wrapped in a towel. How do you safely trim your cat's nails with these items?	Yes	conventional	Step1: Calm the cat down using gentle petting or treats. Step2: Carefully, use the small scissors (as a last resort since this is not an optimum tool for cat nail trimming) to trim the tips of the cat's nails. Always avoid the quick to prevent pain and potential bleeding. Step3: After cutting, use sandpaper to smooth any ragged edges or sharp points that may remain. Step4: Use the adhesive tape t…	infeasible
572	You can't find your dog leash and you need to walk your dog. Available tools: a yardstick, duct tape, a large scarf, a jump rope, a belt and a broken hanger. Your dog is a large and powerful breed, which makes using make-shift leashes difficult. How do you create a makeshift leash with these items?	Yes	conventional	Step 1: Use the belt as the main leash, securing it tightly around your dog's collar. <br> Step 2: Secure one end of the jump rope to the belt using duct tape. <br> Step 3: Reinforce this makeshift leash with more duct tape to ensure its stability considering the size and strength of your large dog. Don't use the yardstick, large scarf, or broken hanger as they may injury the dog or won't withsta…	infeasible
573	You need to clean out your guinea pig's cage, but your dust pan is missing. Tools available: a cereal box, a magazine, packing tape, and a rubber spatula. The problem is, the guinea pig's cage is densely packed with waste. How do you clean the cage using these items?	Yes	unconventional	Step1: Fold the magazine in half lengthwise for rigidity and tape it to one side of the cereal box creating a makeshift dustpan.<br> Step2: Use the rubber spatula to scrape the waste into the makeshift dustpan.<br> Step3: Dispose of the collected waste from the makeshift dustpan outside the cage.<br> Step4: Repeat steps 2 and 3 until the cage is clean.	infeasible
575	You forgot to buy pet food and the stores are closed. Available items: some chicken, rice, vegetables, a pot, a stove, and a blender. Keep in mind your pet is a small animal and needs food in very specific sizes to prevent choking. How do you make a homemade meal for your pet with these items?	Yes	conventional	Step1: Use the stove and pot to cook the chicken, rice, and vegetables until soft.<br> Step2: Let the cooked meal cool.<br> Step3: Put the meal into the blender.<br> Step4: Blend until it reaches a suitable size for your pet to prevent choking.<br> Step5: Serve in suitable portions in the pet's dish.	efficient
576	Your rabbit has chewed a hole in his cage. Available tools: a wire coat hanger, duct tape, a sheet of cardboard, super glue, and a hole puncher. However, your rabbit has a history of chewing cage material posing potential danger. How do you patch the hole in the cage with these items?	Yes	unconventional	Step1: Straighten the wire coat hanger and weave it through the existing cage wires around the hole, reinforcing the region.<br> Step2: Cut a piece of cardboard larger than the hole, then use the hole puncher to create holes on its edges.<br> Step3: String the wire through these holes, securing the cardboard to the cage.<br> Step4: Cover the cardboard on both sides with duct tape to prevent the r…	inefficient
577	Your fish tank's water filter isn't working. Available tools: a sponge, a plastic bag, a water bottle, rubber bands, a straw, and a clean cloth. Unfortunately, the fish tank is exceptionally large. How do you create a makeshift filter with these items?	Yes	conventional	Step1: Cut the bottom off the water bottle and stick the straw into the bottle neck. Secure it with rubber bands. Step2: Layer the cloth, sponge, then the plastic bag inside the bottle. Secure them around the bottle using rubber bands. Step3: Pour unfiltered water in the bottle from the top and collect filtered water from the straw.	efficient
578	You need to entertain your dog indoors on a rainy day. Available items: a tennis ball, a towel, a clothespin, a few empty boxes, and some treats. Keep in mind, your dog is older and does not have the energy to perform demanding physical activities. How do you create a fun game for your dog using only these items?	Yes	unconventional	Step1: Place treats inside empty boxes.<br> Step2: Close boxes using clothespin.<br> Step3: Lay a towel on the floor to avoid mess. <br> Step4: Place the boxes on the towel. <br> Step5: Get the dog's attention by showing the tennis ball.<br> Step6: Hide the tennis ball among the boxes. <br> The game involves the dog sniffing out the treats and the ball, using mental stimulation instead of physica…	inefficient
579	Your cat is cold and you can't find her blanket. Available items: a bath towel, a hairdryer, an old sweater, a hot water bag and some bubble wrap. However, she is a hairless cat who is sensitive to direct heat sources. How do you keep your pet warm using these items?	Yes	unconventional	Step1: Lay the bath towel on a comfortable spot, this is where your cat will rest. <br> Step2: Put the hot water bag on the towel, but leave space for your cat to avoid direct contact.<br> Step3: Wrap the old sweater around your cat gently, to provide warmth without causing any discomfort. The sweater is thick enough to prevent her from feeling the heat directly while keeping her warm.<br> Step4:…	inefficient
580	You need to apply medicine to your pet lizard's skin, but he is very fast. Available items are a clear plastic container, a small paintbrush, latex gloves, a washcloth, and some kale. Notice that your lizard is extremely sensitive to changes in its environment and is prone to easily feel stressed. How do you apply the medicine using only these items?	Yes	unconventional	Step1: Wear the latex gloves to protect your skin and the lizard's. Step2: Baits the lizard with some kale into the clear plastic container. Step3: Once inside and focused on eating the kale, gently use the small paintbrush to apply the medicine. Step4: Use the washcloth to clean up any excess medicine on the lizard's skin or inside the container. Ensure minimal stress and interference with the l…	efficient
581	1. You want to clean the dust off your ceiling fan but it's too high to reach. Tools available: a mop handle, duct tape, a dish towel, a spare sock, a clothes hanger, and a step stool. Constraint: The mop handle is broken into two short pieces and the duct tape isn't strong enough to securely join them. How would you clean the dust off using only these items?	Yes	unconventional	Step1: Attach the dish towel to one end of the broken mop handle using duct tape. <br> Step2: Attach the spare sock around the clothes hanger using duct tape; this will serve as a secondary cleaning tool.<br> Step3: Stand on the step stool and use the mop handle with the dish towel to clean as much dust off the ceiling fan as possible. <br> Step4: Then, use the clothes hanger with the sock attach…	inefficient
582	2. Your living room is too dark, but your lamp bulb just burned out. Available tools: a flashlight, a smartphone, a mirror, tinfoil, car headlights, a large water bottle, and a candle. Constraint: Someone in the house is allergic to strong scents, so lighting the candle is not an option. The mirror has a crack, distorting reflection. How to light up the room using only these items?	Yes	unconventional	Step1: Turn on the flashlight and phone flashlight.<br> Step2: Position the mirror, smartphone, and flashlight to reflect and spread their light. <br> Step3: Shaping the tinfoil into a reflecting 'dish', aim the resulting light towards the ceiling. <br> Step4: Use the car headlights from outside, directed towards the living room window.<br> This arrangement should provide alternative light source…	infeasible
585	5. You have paperwork to shred, but your shredder is broken. Tools available: a pair of scissors, boiling water, a blender, a bag of rice, a tin can, and an iron. Constraint: The scissors are dull, making it difficult to cut paper. The paperwork is laminated, making it resistant to the scissors. How can you shred the paperwork using only these items?	Yes	unconventional	Step1: Use the dull scissors to cut the laminated paperwork into smaller pieces that can fit into the blender.<br> Step2: Put the small pieces of paperwork into the blender.<br> Step3: Add some boiling water inside the blender until the pieces are fully submerged. This will soften the documents, making them easier to blend.<br> Step4: Use the blender's chop and puree functions to thoroughly shred…	inefficient
586	6. You've spilled red wine on your white carpet. Available tools: salt, white wine, a rug, a hairdryer, a vacuum cleaner, a loaf of bread, and dish soap. Constraint: The vacuum cleaner is broken and the loaf of bread is moldy and unfit for use. How can you clean the wine spill using only these items?	Yes	conventional	Step1: Pour some white wine on the red wine spill; it will help dilute the color.<br> Step2: Blot gently with the rug to absorb as much of the liquid as possible.<br> Step3: Sprinkle salt on the stained area, and let it sit for about 10-15 minutes to absorb the remaining wine.<br> Step4: Finally, blot away the salt with a wet cloth and a bit of dish soap to clean the carpet. <br> Step5: Dry the c…	infeasible
587	7. The battery cover on your DVD player remote is broken. Available tools include a paperclip, a strip of duct tape, a rubber band, a fridge magnet, and chewing gum. Constraint: The duct tape has lost its stickiness and the rubber band is brittle and snaps when stretched. How can you fix the battery cover using only these items?	Yes	unconventional	Step1: Straighten the paperclip into a thin rod and slide it into the side of the battery cover, creating a hinge or bar to prevent the cover from sliding off. <br> Step2: Take the fridge magnet and attach it to the outside of the battery cover. The magnetic force will hold the cover against the remote, adding an extra layer of security to keep the cover attached. Chewing gum can be discarded as …	inefficient
588	8. You are trying to hang a picture frame but don't have a level. Tools available: a smartphone, a straight piece of wood, a water bottle, a ruler, a pen, and a book. Constraint: The smartphone is out of battery, and the pen is unreliable as it rolls away. How can you hang the picture frame straight using only these items?	Yes	conventional	Step1: Place the straight piece of wood on the wall where you intend to hang the picture frame.<br> Step2: Balance the water bottle on the piece of wood.<br> Step3: Mark the alignment of the water bottle with a ruler on both ends of the wood.<br> Step4: Align the picture frame with the markings and hang it. The water bottle acting as a makeshift level helps ensure the frame is straight. The ruler…	inefficient
589	9. A spider is in a high corner of your living room and you want to get rid of it. Tools available: an empty bottle, a rolled-up newspaper, a long stick, a can of hair spray, and a shoe. Constraint: The hairspray can is empty and the shoe is too heavy for the stick to support. How can you get rid of the spider using only these items?	Yes	unconventional	Step1: Use the long stick to gently coax the spider from its corner, causing it to drop or move.<br> Step2: As the spider makes its way down the wall, ready the newspaper.<br> Step3: Locate the spider on the floor or wall and quickly trap it under the clear bottle once within reach.<br> Step4: Slide the rolled-up newspaper under the bottle's opening, thereby trapping the spider.<br> Step5: Lift t…	infeasible
590	10. Your coffee table wobbles. Tools available: a stack of old newspapers, a butter knife, a rubber band, a roll of duct tape, and a plastic spoon. Constraint: The newspapers are fragile, easily torn, and not thick enough to support the weight of the table. How can you stabilize the coffee table using only these items?	Yes	conventional	Step 1: Fold the newspapers multiple times in a shape matching the size of the table leg.<br> Step 2: Use the butter knife to tighten and compact the folded newspapers.<br> Step 3: Use the duct tape to cover and further reinforce the folded newspapers.<br> Step 4: Place this compact shape under the short leg of the table and adjust as needed.<br> Step 5: Use the rubber band or additional duct tap…	efficient
591	1. You want to soften up a new leather couch. Tools available: an old tennis racket, a hairdryer, a throw blanket, a massage oil, and a hand-held vacuum cleaner. The throw blanket is made of a material incompatible with oil, like silk. How to soften the couch using only these items?	Yes	unconventional	Step1: Use the tennis racket to consistently hit and knead the leather, this will break down the stiffness. <br> Step2: Warm up the couch using a hairdryer, as heat can help the leather stretch and soften. <br> Step3: Apply massage oil (despite of potential discoloration, which can be negligible in some darker color couches) to nourish and further soften the leather.	inefficient
592	2. Your living room is chilly but your heating system is not working. Tools available: a hot water bottle, blankets, a hairdryer, a teapot full of boiling water, and a metallic heat reflector. The hairdryer is broken. How to warm up the room using only these items?	Yes	conventional	Step1: Fill the hot water bottle with boiling water from the teapot. Step2: Snuggle under blankets with the hot water bottle. Step3: Set the metallic heat reflector at an angle to spread the heat emanating from the hot water bottle and the teapot.	efficient
593	3. Your favorite mug has a small crack and leaks coffee. Tools available: clear nail polish, super glue, a heat gun, a kitchen sponge, and a band-aid. The crack is on the inside bottom of the mug, making it hard to reach with the nail polish or superglue. How to fix the cracked mug using only these items?	Yes	conventional	Step1: Clean and dry the mug thoroughly. <br> Step2: Use the heat gun to gently heat the area around the crack; this will help the super glue bond better.<br> Step3: Apply super glue on a piece of the sponge. <br> Step4: Use the sponge to dab the glue into the crack. The sponge's porous structure can make it easier to apply the glue into the hard-to-reach area.<br> Step5: Let the glue dry complet…	inefficient
701	You accidentally drop a note deep into a tightly filled bookshelf and can't reach it with your hands. Available tools: a broom without bristles, a mouse pad, a retractable pen, a rolling pin, and a metal spatula. Here's the catch - the spatula is too wide for the narrow gaps between the books on the shelf. How will you retrieve the note?	Yes	unconventional	Step1: Extend the retractable pen.<br> Step2: Insert the extended pen into the narrow gap between the books where the note fell.<br> Step3: Use the pen to push the note up gradually. <br> Step4: When the note is within reach, use the broom handle to carefully drag it out.	infeasible
702	You need to repair the spine of a book, but don't have glue. Available tools: a stapler, a hair dryer, a candle, and a roll of duct tape. However, the hairdryer only blows cold air, which isn't hot enough to melt the candle wax. How would you fix the book now?	Yes	conventional	Step1: Position the pages of the book so they align properly at the spine. <br> Step2: Cut a piece of duct tape long enough to cover the length of the book's spine. <br> Step3: Apply the duct tape carefully along the spine, ensuring it adheres uniformly and does not distort the pages. <br> Step4: Staple the duct tape to the first and last pages of the book to secure it further. Use the stapler fo…	inefficient
703	A small insect has landed on the page of a rare and fragile book. You can't touch the book and available tools don't include tweezers. Available tools: a paper towel, a magnifying glass, a hairbrush, and a drinking straw. The book is extremely delicate and liable to fly apart if subjected to any kind of forceful air current. How can you remove the insect?	Yes	unconventional	Step1: Roll the paper towel into a tube.<br> Step2: Carefully place the tube near the insect.<br> Step3: Wait for the insect to crawl into the tube.<br> Step4: Lift the paper towel tube, with the insect inside, away from the book.	inefficient
706	A computer in the library needs to be relocated, but there is no dolly. Tools available include bungee cords, a skateboard, bubble wrap, a thick rug, and a coat rack. The floor of the library is uneven and has numerous small ramps not suitable for rolling objects. How to move the computer safely?	Yes	unconventional	Step1: Wrap the computer in bubble wrap for protection. <br> Step2: Place the wrapped computer on the thick rug. <br> Step3: Secure the computer to the rug using bungee cords to prevent it from moving. <br> Step4: Two people can then lift up the ends of the rug and carry the computer to the new location. The coat rack and skateboard are not used in this process as the uneven floor and ramps are n…	inefficient
707	Noisy kids in the library and you have no 'Quiet Please' sign. Tools available: a white shirt, markers, a wire hanger, and a desk lamp. The room is brightly lit and the message on the shirt is not easily discernible under the lamp. How can you create a makeshift sign?	Yes	unconventional	Step1: Straighten the wire hanger to form a long, straight piece.<br> Step2: Use markers to write "Quiet Please" on the white shirt.<br> Step3: Attach the white shirt with the message to the straightened wire hanger, creating a flag-like sign.<br> Step4: Hold or mount the improvised sign in an easily visible location. Turn off the desk lamp so the light in the room does not reflect the message on…	inefficient
708	A poster needing to hang in the library but no ladder is available. Tools available: a broomstick, a mop, sticky tape, a long scarf, and table. The ceiling where the poster needs to hang is too high even when standing on the table with the broomstick. How can you hang up the poster?	Yes	unconventional	Step1: Put the table on one side of the wall. Step2: Attach the poster to the broomstick using the sticky tape. Step3: Tie the long scarf securely around the broomstick. Step4: Stand on the table and use the scarf-broomstick combination to hang the poster at the desired height. Note: Ensure safety while standing on the table. Use mop for balance if required.	infeasible
709	The corners of many books have been bent and need to be straightened but no heavy weights are available. Tools: a hair straightener, a shoe box, a roll of aluminum foil, and a stack of magazines. The books are antique with paper very sensitive to heat and could easily burn. How would you straighten the book corners?	Yes	unconventional	Step1: Gently unfold the bent corners of the books and smoothen them with your hand.<br> Step2: Tear off a piece of aluminum foil long enough to cover the corner of the book and fold it into a flat, thick strip.<br> Step3: Place the strip on the bent corner, lining it neatly.<br> Step4: Place a magazine on top of the foil to provide some weight and evenly distribute the pressure.<br> Step5: Place…	inefficient
710	A library card has slipped in between the wood panels of the floor. Tools available: a measuring tape, a vacuum cleaner, an ice cream stick and a wire coat hanger. The card is quite stuck between the panels and trying to lift it with a hanger might tear it apart. How can you retrieve the card?	Yes	conventional	Step1: Straighten the wire coat hanger and carefully slide it beneath the card. <br> Step2: Using the ice cream stick, press down the other end of the card to prevent it from tearing. <br> Step3: Slowly pull the hanger out while keeping pressure on the card with the ice cream stick to safely retrieve the card without causing it any damage.	efficient
712	A computer system needs to be cleaned from dust but there is no air duster available. Tools available: a hair dryer, a turkey baster, a desk fan, and a paintbrush. The dust is tightly adhered to the surface and can't be easily brushed off. How could you clean the dust?	Yes	conventional	Step1: Unplug the computer system.<br> Step2: Use the paintbrush to gently loosen the dust build-up.<br> Step3: Use the turkey baster to create a focused stream of air. This will let you direct the air at specific areas and blow away the loosened dust. <br> Step4: Use the desk fan to further blow away the loosened dust, targeting larger, wider areas.<br> Step5: Use the hair dryer (on the cool set…	inefficient
714	A book's page has ripped but there is no clear tape. Tools available: a bottle of nail polish, a packet of sugar, a band-aid, and a receipt paper. However, the ripped page is larger than the size of the band-aid. How can you fix the ripped page?	Yes	unconventional	Step1: Align the ripped portion of the page.<br> Step2: Apply nail polish to the ripped edges, which can act as a binding agent.<br> Step3: Press the edges together and hold until the nail polish dries, bonding the ripped page together. Use the receipt paper under the page to avoid any mess.<br>	efficient
715	A laptop falling off a table due to an uneven surface, but no laptop stand is available. Tools available: text books, a Bento box, mouse pad, and a plastic chopping board. However, the textbooks are softcover and cannot support the weight of the laptop. How can you make a laptop stand to level the surface?	Yes	unconventional	Step1: Place the chopping board flat on the table - it's sturdy and will form the base. <br> Step2: Under the uneven side of the chopping board, slide in the bento box to level it. Align as required.<br> Step3: Place the mouse pad on the chopping board to prevent the laptop from slipping.<br> Step4: Set the laptop on this stand which is now leveled with the help of the Bento box.	infeasible
716	There's a frisbee stuck high up in a tree and your ladder is broken. Tools available: fishing line, a tennis ball, a water bottle, a broom handle, a raincoat, a beach towel, sunglasses and a book. However, the frisbee is stuck at a height beyond the reach of the broom handle and you can't throw the tennis ball high enough. How can you get the frisbee down?	Yes	unconventional	Step1: Use the fishing line and tie it to the water bottle, making a makeshift pendulum. Step2: Swing the water bottle to create enough momentum and aim to hit the frisbee. Step3: Upon contact, the frisbee should be dislodged from the tree.	efficient
718	You've arrived at a park only to find wet benches after a mild shower. Tools available: picnic blanket, three empty soda cans, your kid's pail and spade. Unfortunately, the pail has holes in it, making it unusable to sit on. How do you sit without getting your clothes wet?	Yes	conventional	Step1: Place the three soda cans on the bench in a line with equal spacing in between, these will act as stands.<br> Step2: Spread the picnic blanket over the soda cans, so it is raised off the wet bench.<br> Now, you can sit on the blanket without getting wet as the blanket is raised from the wet bench surface by the soda cans.	infeasible
719	You have to peel an orange at the park for your child, but you've forgotten a knife. Tools: a spoon, a comb, a house key, a plastic fork, and a coin. Unfortunately, your house key is a modern, smooth edge key that doesn't have a sharp edge to cut with. How do you peel the orange?	Yes	unconventional	Step1: Hold the orange firmly with one hand.<br> Step2: Use the sharp tines of the plastic fork to pierce the top of the orange's skin.<br> Step3: Work the fork around to create an initial opening in the peel.<br> Step4: Leverage the spoon to continue breaking the peel apart, working it around the orange in a circular motion.<br> Step5: Once the peel is sufficiently loosened, use your hands to re…	inefficient
720	You want to grill some sausages at the park but forgot the grilling tools. Available: a metal hanger, aluminum foil, plastic forks, a plastic bottle, and a pair of glasses. But your metal hanger is actually a wire hanger covered in plastic, not suitable for use with heat. How could you cook the sausages?	Yes	unconventional	Step1: Unravel the metal hanger and remove the plastic covering to reveal the metal wire underneath. Step2: Form the wire into a makeshift grill or skewers to hold the sausages. Step3: Use the aluminum foil to make a protective layer on the ground where you can put some heated coals or wood for grilling. Place your wire grill/skewers with sausages over the heat to cook.	inefficient
722	A bird snatched away your only hair tie while setting up a picnic. You need to keep your hair up. The items available - picnic blanket, wet wipes, a plastic bag, sunglasses and a bandana. Unfortunately, your bandana is small, more a decorative item than a practical head wrap. What can you use to tie your hair back?	Yes	unconventional	Step1: Fold the bandana several times until it's a long, thin strip.<br> Step2: Gather your hair in a ponytail and wrap the bandana around it.<br> Step3: Tie the ends of the bandana strip together to secure your hair.<br> Tools: Small bandana.	infeasible
723	While fishing in the park pond, your fishing line snaps and you don't have an extra. Available items: dental floss, a tea bag, a piece of gum, a plastic spoon, and a soda can. However, your dental floss is the flat, tape kind that can't hold the weight of a fish. How do you fix your fishing line?	Yes	unconventional	Step1: Using the soda can, tear off a strip of metal.<br> Step2: Soften the piece of gum by chewing it.<br> Step3: Use the gum to fix the broken fishing line.<br> Step4: Reinforce the gummed section with the strip of soda can metal as a splint.<br> Step5: Drop the tea bag in the water to attract fish as a bait.	inefficient
724	You want to relax in a hammock but forgot rope to install it. Available: yoga mat, bungee cord, polyester jacket, and a few carabiners. However, the bungee cord is too short to reach between two trees. How can you hang the hammock?	Yes	unconventional	Step1: Use the jacket, yoga mat and bungee cord to increase the length of the bungee cord. Tie the jacket and mat tightly to each end of the bungee cord.<br> Step2: Attach carabiners to both ends of the hammock.<br> Step3: Hook one end of the extended bungee cord to a carabiner, then wrap around a tree and back onto the same carabiner. Repeat for the other end on a different tree. <br> (Note: saf…	infeasible
725	Dog's leash has snapped while in the park. Available items: shoelaces, a necktie, a scarf, and your belt. Your belt is needed to hold up your pants and the shoelaces are extremely thin and frayed. Can you make a makeshift leash?	Yes	unconventional	Yes, it is possible.<br> Step1: Use the scarf to create the leash by tying one end securely around the dog's collar.<br> Step2: Utilize the necktie to strengthen and elongate the scarf leash by tying one end to the loose end of the scarf.	inefficient
727	You're having a picnic and realized you forgot the cutting board for chopping fruits. Available items: frisbee, magazine, plastic lunch box lid, and a beach mat. The problem is, the frisbee is shaped with a round and deep curve, and the plastic lunch box lid is too small. How can you manage to cut the fruits	Yes	unconventional	Step1: Open up the magazine and fold it in half for tightness and added strength.<br> Step2: Place the folded magazine on a flat surface or on your lap.<br> Step3: Use the folded magazine as a temporary cutting board to chop the fruits using a knife.	efficient
728	You're in a park on a hot day but your umbrella is broken. Available tools: a large leaf, two sticks, a water bottle, bandana, and sunglasses. However, the leaf is fragile and torn and the bandana is very thin. How can you make a shade?	Yes	unconventional	Step1: Clean the two sticks and make an X shape. <br> Step2: Tie the X with the bandana to secure it. <br> Step3: Gently place the large leaf on top of the X-shaped sticks. <br> Step4: Use the water bottle to balance and hold the sticks if needed.<br> Step5: Wear the sunglasses for extra protection. <br> This makeshift canopy will provide some respite from the sun.	infeasible
729	Your kite's string breaks while flying it in the park and you don't have any extra spools. Available tools: your shoelaces, headphone wires, a ball of yarn from a sweater, and a thread from your bag's zipper. The headphone wires are very short and shoelaces too frayed, and the yarn from the sweater is a few threads. How do you fix it?	Yes	unconventional	Step1: Untie the shoelaces and straighten them out as best as possible. <br> Step2: Unwind the ball of yarn and thread from the bag's zipper entirely. <br> Step3: Knot the end of the shoelaces, the yarn, and the zipper thread together securely to create an extended string. <br> Step4: Tie the other end of this new string securely to the kite. Now you can fly the kite again.	inefficient
731	You need to drain the water off the pool cover so you can remove it, but you don't have a pump. You have a garden hose, a bucket, a pair of swimming goggles, and a pool noodle. The garden hose has a leak. How can you utilize these items to remove the water?	Yes	unconventional	Step 1: Use the bucket to manually remove as much water from the pool cover as possible. <br> Step 2: Put on the swimming goggles and find where the hose is leaking. <br> Step 3: Connect the end of the garden hose to a spot lower than the pool, allowing gravity to help drain the water. <br> Step 4: Use the pool noodle to guide the leaking part of the hose out of the pool, so the water drains out …	inefficient
732	You need to attach a new swimming lane marker, but you don't have any clips. You have available plastic pool toys, a snorkel, a pool skimmer net, duck tape, weighted diving rings, and a pool umbrella. However, the duct tape has lost its stickiness due to being stored in damp conditions. How can you attach the marker?	Yes	unconventional	Step1: Thread the snorkel through the swimming lane marker.<br> Step2: Loop the net of the pool skimmer over the end of the snorkel and pull it tight to secure it.<br> Step3: Place a weighted diving ring on the pool floor directly under where the marker should be.<br> Step4: Put the other end of the snorkel in the diving ring. This will weight it down and keep the lane marker in place.<br> Step5:…	infeasible
733	You want to play a game of water polo but don't have a proper water polo goalpost. You have pool noodles, duct tape, flip flops, and a floating lounger. Unfortunately, the duct tape is used up and the pool noodles are too short. How can you make a makeshift goalpost?	Yes	unconventional	Step1: Place the floating lounger upside down in the pool, this acts as the base of your goalpost.<br> Step2: Use the flip flops and place them on the lounger's edges that are now underwater, these are your uprights.<br> This setup forms a makeshift goalpost, where the underside of the lounger is the crossbar and the flip flops act as posts.	infeasible
734	Your pool cleaning robot has stopped working. You have a pool net, a rubber hose, a pool float, a kickboard, and a water gun. The pool net has a massive hole and the water gun doesn't squirt water. How can you manually clean the pool?	Yes	conventional	Step1: Use the kickboard to manually push debris towards one end of the pool. <br> Step2: Use the rubber hose to create a siphon. Place one end in the pool and the other end in a bucket. Operating the siphon will pull debris and dirty water into the bucket. <br> Step3: Use the pool float to skim the surface for floating debris. <br>	infeasible
735	You want to teach your children to swim, but you don't have any flotation devices. Your available items are a cooler, a yoga matt, a bucket, a large plastic container, and some duct tape. The large plastic container has a huge crack in it, making it impossible to stay inflated. How can you create a flotation device with these items?	Yes	unconventional	Step1: Using the duct tape, seal the crack in the large plastic container. <br> Step2: Roll the yoga mat and place it into the container. <br> Step3: Fill any remaining space in the container with the items from the cooler and the bucket. <br> Step4: Securely close the container ensuring it is airtight.<br> Step5: Test the container in water to ensure it floats, adjust the contents if necessary.<…	infeasible
736	You want to make a fun water slide in your backyard into your above-ground pool but you don't have a proper slide. You have a tarp, an inflatable mattress, a garden hose, and a beach ball. The tarp is riddled with holes and the inflatable mattress has a leak. How can you make a water slide?	Yes	conventional	Step1: Inflate the mattress as much as possible before the air leaks out. <br> Step2: Position the inflated mattress on a slope in your backyard leading to the pool as the base of your slide. <br> Step3: Cover the mattress with the tarp. Although the tarp has holes, it should still considerably reduce friction. <br> Step4: Use the garden hose to keep the tarp wet and slippery. <br> Step5: Use the…	inefficient
737	Your pool's ladder broke and you need to get out. You have pool noodles, a pool cover, a large beach towel, a life vest, and a cooler. The pool noodles are too soft and flexible to hold any weight and the pool cover is torn. How can you get out of the pool?	Yes	unconventional	Step1: Float the cooler in the water. Step2: Put the life vest on for safety. Step3: Using the beach towel, create a rope by rolling or folding it lengthwise. Step4: Secure one end of the towel-rope to the cooler handle. Step5: Throw the other end of the towel-rope onto the pool edge. Step6: Pull yourself out of the pool using the towel-rope, while using the floatation of the cooler to aid you. M…	infeasible
738	You need to fish out some debris from the bottom of your deep pool, but you don't have a long net. You have a short pool skimmer, a pool noodle, a pair of goggles, and a set of long tongs. The pool noodle is broken in half and the goggles have a leak. How can you retrieve the debris?	Yes	unconventional	Step1: Put on the leaky goggles to aid in visibility under water.<br> Step2: Holding the pair of long tongs securely, use the short pool skimmer to extend your reach by tying or attaching the tongs to the end of the skimmer.<br> Step3: Lean over the edge of the pool while holding the extended tool and reach down to remove the debris.	inefficient
739	Your diving goggles are fogging up and you don't have any defogging spray. You have hand soap, a beach towel, a shower cap, and a squirt water gun. The hand soap bottle is empty and the goggles are scratched. How can you prevent your goggles from fogging up?	Yes	unconventional	Step1: Wet the inside of the goggles using the squirt water gun.<br> Step2: Using your finger, apply a thin layer of hand soap on the inside of your goggles.<br> Step3: Rinse off the soap under a tap until it is fully removed with no soap bubbles remaining.<br> Step4: Dry off the goggles using the beach towel gently without rubbing the lenses. This will create a thin film on the lens that will pr…	inefficient
742	You need to mark lanes in your pool but don't have the dividers. Using only pool noodles, duct tape, and flip flops, the pool noodles are different lengths and the duct tape is not water-resistant. How can you create makeshift lane dividers?	Yes	unconventional	Step 1: Place the pool noodles end-to-end in the water along the length of the pool where you wish to form lanes, ensuring they are floating.<br> Step 2: Slip flip-flops onto the pool noodles at intervals to hold the noodles together and keep in place.<br> Step 3: Secure the ends of noodles and flip-flops with duct tape to ensure stability on the pool edges. Even if the tape won't last submerged,…	efficient
744	Your floating pool light has died and you want to create a romantic ambiance for an evening swim. You have jars, glow sticks, duct tape, and floating flowers. However, the jars have narrow tops, making it impossible for the glow sticks to fit inside. How can you create a luminous setting?	Yes	conventional	Step1: Activate the glow sticks. Step2: Use the duct tape to attach the glow sticks to the outside of jars. Step3: Float the jars in the pool along with the floating flowers. Tools for these steps include glow sticks, jars, and duct tape.	infeasible
746	You're shopping and a product you really want is on the top shelf, far out of your reach. Tools available: a shopping cart, an umbrella, a broom from the cleaning aisle, and a stack of paper towels. The problem is, the broom has a short handle and would not reach the high shelf. How do you retrieve the item?	Yes	unconventional	Step1: Position the shopping cart beneath the desired item's location on the shelf.<br> Step2: Place the stack of paper towels in the shopping cart to increase your height.<br> Step3: Stand on top of the paper towel stack in the cart.<br> Step4: If still unable to reach, grab the umbrella, extend it and use it to nudge your desired item off the shelf. Retrieve it from the floor or catch it.	infeasible
747	You're in a grocery store where the freezing aisles make you feel cold, and you didn't come prepared. Tools available include produce bags, paper bags, a roll of tape, and plastic cutlery. The issue is, the produce bags are too small and thin to cover a significant area of your body. How could you keep yourself warm with these items?	Yes	conventional	Step1: Use a paper bag and cut holes for your head and arms, like a poncho. Step2: Fill this makeshift poncho with produce bags for extra insulation. Step3: Use tape to secure the bags together and stop them from falling out. Step4: Use the plastic cutlery to help shape the paper bag if needed.	infeasible
748	You are shopping for groceries and realize you need to keep your frozen items cold until you get home. Sadly, the store has run out of bags with insulation. Available tools include a large cardboard box, regular plastic bags, bubble wrap, and duct tape. However, the cardboard box is too flimsy to hold the weight of the frozen items. How could you create an improvised insulated bag?	Yes	conventional	Step1: Use duct tape to reinforce the structural integrity of the cardboard box.<br> Step2: Line the inside of the cardboard box with bubble wrap as insulation using more tape. <br> Step3: Place your frozen items into the box. <br> Step4: Cover the top with more bubble wrap, then secure it with more duct tape.<br> Step5: Finally, put the box inside a plastic bag for an extra layer of protection a…	infeasible
749	You've finished your grocery shopping and it's raining heavily outside. You realize you forgot your umbrella. Tools available: a large trash bag, duct tape, a newspaper, a broom, and a metal hanger. The challenge is the trash bag is full of holes, making it unsuitable for use as a raincoat. How do you stay dry while getting to your car?	Yes	unconventional	Step1: Open up the newspaper fully to make it as large as possible. Step2: Bend the metal hanger into a circular shape that is about the same size as the newspaper. Step3: Use the duct tape to attach the newspaper to the hanger, this will form the canopy of our makeshift umbrella. Step4: Attach the broom handle to the metal hanger using more duct tape, this will act as the handle of our umbrella.	infeasible
750	You're at a mall where all the benches are taken. You have a shopping bag full of clothes, a coat, and a soda cup with a lid. The constraint is, the shopping bag is not sturdy enough to support a person's weight. How can you create a comfortable spot to sit and rest?	Yes	unconventional	Step1: Lay down the coat on the floor to create a comfortable and clean base. <br> Step2: Sit on the coat with the shopping bag in your lap. <br> Step3: Use the lid-closed soda cup to rest your elbow or hand while sitting, or place it nearby for quick access. <br> Tools: Coat, shopping bag, soda cup.	inefficient
753	You're at the flea market and find a beautiful old painting, but it's dusty and dull. Available tools: a bottle of water, a cotton cloth from a stall selling clothes, an old toothbrush from a nearby trash bin, and a pack of chewing gum. However, the paint on the painting is too old and may get damaged if water or any other liquid comes in contact with it. How can you clean and shine the painting?	Yes	conventional	Step1: Use the dry cotton cloth to carefully wipe off the top layer of dust from the painting. Step2: Use the dry old toothbrush to gently scrub dirt out of the fine details and textures in the painting. Do not use water or chewing gum as they can damage old paint.	efficient
754	You're shopping for clothes but the fitting room queue is too long. Available tools: a large full-length mirror from the decor section, curtains from the home section, duct tape, and a clothes rack. The mirror is extremely heavy and too large to be moved by one person, the curtains are not thick enough to provide enough privacy, and the store policies forbid the use of duct tape on their merchand…	Yes	conventional	Step1, move the clothes rack to the full-length mirror. Step2, hang curtains on the clothes rack to form three sides of the fitting room. The mirror serves as the fourth wall. No need for duct tape as curtains can simply be draped on the clothes rack. This solution won't defy store policies or require extreme physical effort.	inefficient
756	You're shopping at a store that only accepts cash, and you find out that the ATM inside is not working. Tools available: your credit card, a nearby internet cafe, and a taxi cab outside. The internet cafe doesn't offer gift cards and the taxi driver only accepts cash. What could be a possible solution?	Yes	conventional	Step1: Go to the internet cafe. <br> Step2: Use your credit card to do a cash advance online at a site like PayPal or Western Union.<br> Step3: Transfer the cash to your own account and choose to pick up at a nearby location.<br> Step4: Pick up the cash.<br> Step5: Use the cash at the store.	infeasible
757	You have lots of shopping bags and you need to arrange them in such a way to take the bus home. Tools available: a laundry basket, masking tape, string, and a hook. The laundry basket has large holes in the bottom and the masking tape is not sticky enough to hold the bags together for a long time. How could you arrange your shopping bags for a convenient journey?	Yes	unconventional	Step1: Use the string to tie the shopping bags together at the handles. Step2: Place them inside the laundry basket. Step3: Use the hook to secure the top of the laundry basket to prevent bags from falling out.	infeasible
759	The zipper on your jacket jams while at a shopping mall and it's extremely cold outside. Tools available: a straw from the food court, a bottle of hand sanitizer, a safety pin from a clothes shop, and a paper clip. Unfortunately, the straw is too wide for the zipper teeth and the safety pin is too short to reach the jam in the zip. How do you fix the jammed zipper?	Yes	unconventional	Step1: Unbend the paper clip to make it straight. <br> Step2: Use the straightened paper clip to reach the jam in the zip and try to remove the obstruction.<br> Step3: If the jam persists, put a small amount of hand sanitizer on the jammed area as it can act as a lubricant. <br> Step4: Gently move the zipper up and down to work the sanitizer in and free the jam.	efficient
760	You bought a pair of shoes that are too tight and the store doesn't allow testing before buying. Tools available: a hairdryer from the electronics section, thick socks from a nearby clothing store, a bag of wet sand from the gardening shop. The hairdryer is not powerful enough and there's no dry place to plug it in, while the sand is too wet, making it hard to put into the shoes. How can you stre…	Yes	conventional	Step 1: Purchase the thick socks from the nearby clothing store.<br> Step 2: Wear the thick socks and then put on the tight shoes.<br> Step 3: Walk around in the shoes with the thick socks for several hours. The heat and sweat from your feet along with the thickness of the socks should gradually stretch the shoes. <br> If this doesn't work, it will not be possible to use other tools due to enviro…	inefficient
762	You're at a picnic and realize you forgot your bottle opener at home. Tools available: a plastic spoon from your picnic basket, a shoe, a car key, a picnic blanket, a piece of aluminum foil, a rock. The key is a smart key and cannot be used for this purpose, the shoes are too soft (eg. sneakers), and the ground is too uneven to stand stably. How to open the bottle using only these items?	Yes	unconventional	Step1: Fold the aluminum foil multiple times to make a thick, sturdy bar.<br> Step2: Position the folded foil under the cap's edge, hold the neck of the bottle with one hand, use the rock with your other hand, hit the foil upwards. This should open the bottle.	inefficient
763	You want to share a cupcake at a date but have no knife to cut it. Tools available: a plastic spoon, a drinking straw, your car keys, a comb from your purse, a business card, a paper napkin. The business card is too weak and bendy to cut through the cupcake, and the cupcake is excessively crumbly. How to cut the cupcake into equal parts using only these items?	Yes	unconventional	Step1: Use the edge of the car key to press down on the middle of the cupcake, creating a long crease. <br> Step2: Turn the cupcake 90 degrees, then again use the car key to press another crease into the cupcake. <br> Step3: Carefully pull apart the cupcake along the creases to create four roughly equal pieces. The cupcake is divided using the car keys and hands.	inefficient
764	While having a meal outside on a windy day, your paper napkins keep blowing away. Tools available: a pair of sunglasses, your phone, a small bottle of water which is empty, a can of soda which is open and half-drank, a bag of chips which is almost empty and light, a tissue box. Despite these challenges, how do you keep the napkins from flying away?	Yes	unconventional	Step1: Place the half-drunk soda can on one end of the napkins.<br> Step2: Put your phone on the other end of the napkins.<br> Step3: Rest your sunglasses on a third side of the napkins.<br> Step4: Fill the small water bottle with soda from the can and place it at the remaining edge of the group of napkins. <br> Step5: If needed, use empty chips bag to cover the napkins to further keep them prote…	inefficient
765	You're out on a picnic and forgot to bring a bottle opener for your wine. Tools available: a car key which is a smart key and doesn't have a metal part, a pen which is oddly shaped, your shoe, a belt, a picnic blanket and a picnic basket. Given the limitations of your tools, how do you open the wine bottle?	Yes	unconventional	Step1: Place the bottom of the wine bottle on the picnic blanket spread out on the ground<br> Step2: Tilt the wine bottle a little to ensure the cork does not come flying out and injure anyone<br> Step3: Use the shoe to tap the bottom of the wine bottle (where you would usually pour out the wine from) repeatedly but gently until the cork slightly comes out due to the pressure.<br> Step4: Pull out…	infeasible
766	You're at a campground and forgot the grill grates for your portable grill. Tools available: a spare tire, a rake, a metal hanger, a wire mesh from a firepit which doesn't exactly fit your grill, wooden sticks. Taking these constraints into account, how do you grill your food?	Yes	unconventional	Step1: Balance the spare tire on a couple of wooden sticks staked into the ground.<br> Step2: Position your portable grill inside the tire to stabilize it.<br> Step3: Straighten out the metal hanger and rake to create a makeshift frame for grilling.<br> Step4: Attach the wire mesh from the firepit using the new frame and hanger to secure it to the top of the tire/cooking area.<br> Step5: Arrange …	inefficient
767	You're out for a picnic and forgot to bring any utensils. Tools available: a banana leaf full of holes, chopsticks that are too short and thin, coke bottle which is mishappen, Pringles can that is too small, foil wrapper from a sandwich, a plastic lid. Given these difficulties, how can you eat your food using only these items?	Yes	unconventional	Step1: Use the plastic lid as a plate. <br> Step2: Straighten the chopsticks and use them for picking the food. <br> Step3: Fold the foil wrapper for scooping if the chopsticks are not convenient for certain types of food. <br> Optional: If the food is soup or liquid, one can try to drink from the coke bottle or Pringles can after cleaning them.	infeasible
768	You're out for sushi but left your chopsticks in the car. Tools available: a few straws, a pair of sunglasses, a make-up pencil from your purse which is very short, your phone, a hair tie which is stretched out and loose. Despite these problems, how do you use these items to eat your sushi?	Yes	unconventional	Step 1: Clean the make-up pencil and the hair tie. <br> Step 2: Straighten the hair tie as much as possible.<br> Step 3: Wrap one end of hair tie around the mid-section of the make-up pencil, making sure it's tight and secure.<br> Step 4: Repeat this with a straw, creating a tension-based joint which allows you to open and close your makeshift chopstick.<br> Step 5: Secure the other end of the ha…	infeasible
770	How do you prevent your iced coffee from diluting en route to the picnic site? Tools available: a Thermos flask, a sandwich bag, a spare shirt, a handful of berries too large to fit into the mouth of your Thermos, a small cooler bag and a pack of tissues. How can you keep your coffee chilled without dilution in this situation?	Yes	conventional	Step1: Pour the coffee into the Thermos flask which is built to retain temperature. Step2: Put the Thermos into the cooler bag to add another layer of cold insulation. Step3: If the weather is hot, wrap the cooler bag in the spare shirt for additional cooling. Spare shirt will not only provide an extra layer of insulation but will also take care of any possible condensation.	inefficient
771	At a food truck park, your takeout food is getting cold and you want to reheat it. Tools available: car engine, foil paper that is very thin and tears easily, a rock, a can of soda, a cloth bag. How do you reheat the food taking into account the condition of available tools?	Yes	unconventional	Step1: Open the hood of the car and find a hot part of the engine. Step2: Wrap your food in the foil paper. Step3: Place your wrapped food on that part of the engine. Step4: Close the hood and let the engine heat your food for a few minutes. Make sure to check periodically to avoid any damage. Use the cloth bag for handling hot foil.	infeasible
772	You have to carry multiple cups of coffee from a kiosk to your outdoor sitting area. Tools available: a large snack box without partitions, a Frisbee, a towel, your purse, your hat. How can you ensure that you carry all the cups without spilling, given the structure of your snack box?	Yes	unconventional	Step1: Place the towel at the bottom of the snack box to provide stability and absorb any minor spills. <br> Step2: Arrange the cups of coffee on the towel in the snack box. <br> Step3: Use the Frisbee as a lid to cover the top of the snack box to prevent the coffee from spilling off the top. <br> Step4: Carry your purse and hat separately to avoid overfilling the snack box.	infeasible
773	You're at a BBQ party, and the grill is not leveled, leading to uneven cooking. Tools available: a large stone which is round, beer cans that are not full, a plastic cutting board, a paper plate, and an oven mitt. How do you level the grill considering your tools aren't ideal for the task?	Yes	conventional	Step1: Place the round stone under what seems to be the lowest part of the grill to attempt to even it out.<br> Step2: If the grill is not stable, stack the beer cans until they provide enough lift to stabilize the grill.<br> Step3: Use the oven mitt to adjust the stone or beer cans while the grill is hot.<br> Note: The plastic cutting board and the paper plate are not safe to use for leveling as…	efficient
1072	You are in a kitchen. The jar is too narrow for your hand to fit in and the chopsticks are too short to pick up the cookies, plus the cookies are too small and brittle to be hooked. You have a glass cleaner, a cheese grater, a tall and narrow cookie jar made of glass, a pair of wooden chopsticks, a thin rubber band, a roll of sticky tape, a stainless spoon, a plastic straw, and a cereal box. How …	Yes	conventional	Step1: Empty the cereal box and keep it aside. <br> Step2: Attach the sticky tape to the spoon in a way that the sticky side is outwards. <br> Step3: Insert the spoon into the cookie jar and touch the cookies with the sticky side of the tape. <br> Step4: Pull the spoon out slowly, bringing the cookies stuck to the tape with it. <br> If a cookie falls, repeat step3 until all cookies are out. <br> …	inefficient
1074	While hiking in the rain, you come across a fallen tree blocking the trail. The tree's trunk is too large to be cut by the small saw. Your backpack contains a pack of energy bars, a bird whistle, a flashlight, a metal water bottle, a compass, a rope, a sturdy raincoat, and a small saw. How can you clear the trail and continue your hike using only these items?	Yes	unconventional	Step1: Tie the rope around the tree trunk.<br> Step2: Use the metal water bottle as a weight, tie it to the other end of the rope.<br> Step3: Swing the water bottle to create momentum and use it to pull or roll the tree out of the path.<br> Tools: Rope, Metal Water Bottle.	inefficient
1075	You are stuck outside in a heavy rainstorm, and your car's windshield wipers are broken. However, the disposable diapers are too heavy for the wiper arms to lift. Inside the car, you have an empty coffee cup, a pack of disposable diapers, a pair of sunglasses, a scarf, a plastic bag, a phone charger, a water bottle, and a roll of duct tape. How can you create makeshift windshield wipers using onl…	Yes	conventional	It is not possible to create makeshift windshield wipers with the provided items that would be suitable for driving home safely. While you could potentially create a temporary solution, this would not be safe or legal to use while driving, especially in heavy rain. Visibility is crucial for safe driving and a makeshift solution could not provide the necessary level of visibility. It is recommende…	none
1076	During a camping trip in the rain, you realize that your tent has a leak. The tent is too high for you to reach the leaking spot. The available items are a pair of boots, a sketchpad, a pocket knife, a carabiner, a tin can, a pack of zip ties, a headlamp, and a plastic tarp. How can you fix the leak in your tent using only these items to keep yourself dry during the night?	Yes	unconventional	Step1: Use the pocket knife to cut the plastic tarp into a size that can cover the leak. <br> Step2: Use the zip ties to securely attach the cut-out tarp to the carabiner. <br> Step3: Throw the carabiner over the tent so that the tarp covers the leak from the outside.<br> Step4: Inside the tent, use zip ties to secure the tarp in place to prevent it from moving around.	infeasible
1077	You are hosting a barbecue, and it starts raining. Your grill doesn't have a cover and the metal baking sheet is too small to entirely cover the grill. But you have a metal baking sheet, a pair of tongs, a tablecloth, a bottle of barbecue sauce, a rubber spatula, a roll of aluminum foil, a kitchen towel, and a pack of clothespins. How can you protect the grill from the rain using only these items…	Yes	unconventional	Step1: Unroll the aluminum foil and use it to cover the grill, creating a makeshift cover.<br> Step2: Secure the edges of the aluminum foil with the clothespins to prevent it from flying away. This should protect the grill from the rain and allow you to continue cooking.	efficient
1078	You are stuck in a downpour and need to mark your location for rescue. The water bottle is opaque, meaning it won't glow brightly enough even with the glow sticks inside. You have a pair of binoculars, a plastic water bottle, a bandana, a hairbrush, a pack of glow sticks, a whistle, a roll of aluminum foil, and a tube of sunscreen. How can you create a visible and audible distress signal using on…	Yes	unconventional	Step1: Crack the glow sticks and shake them to activate the chemical light. <br> Step2: Wrap the glow sticks in the aluminum foil to increase the visibility of the light. <br> Step3: Use the bandana to tie the glow sticks high up in a tree. <br> Step4: Use the whistle to make loud noise periodically to attract attention.	infeasible
1082	You want to create a DIY bedside table but don't have any spare furniture. The available items are a pack of binder clips, a glue gun, a wooden board, a roll of decorative contact paper, a pair of scissors, a small basket, a stack of books, and a can of spray paint. However, the stack of books is not stable and may fall if the wooden board is placed on top. How can you create a functional bedside…	Yes	unconventional	Step1: Use the glue gun to secure the binder clips on the four corners of the wooden board, these will act as the legs. Step2: Place the wooden board on top of the small basket for extra support. Step3: Cover the wooden board with decorative contact paper using scissors to cut the paper to size. Step4: Spray paint the entire table to match.	infeasible
1083	You want to mount a curtain rod in your bedroom, but the available wall space is limited. The available items are a step ladder, a piece of rope, a pair of scissors, a pack of adhesive hooks, a small broomstick, curtain rings, a roll of double-sided tape, and a tension rod. However, the tension rod is too small compared to the wall's width. How can you successfully mount the curtain rod using onl…	Yes	unconventional	Step1: Measure the needed length using the rope. Step2: Cut the broomstick to the required length using the scissors. Step3: Mount the adhesive hooks on the wall at the measured distance using the step ladder for reach. Step4: Thread the cut broomstick through the curtain rings. Step5: Hang the broomstick on the adhesive hooks.	infeasible
1084	You want to create a decorative headboard for your bed, but you don't have any spare material. The available items are a roll of duct tape, glue, a roll of contact paper, a stack of old magazines, a stapler, a pair of scissors, colored pencils, and a piece of cardboard. But, the cardboard is too thin to support several layers of magazines. How can you create a stylish headboard using only these i…	Yes	conventional	Step1: Cut the magazines into strips. Use colored pencils to add designs on the strips for customization. <br> Step2: Apply glue on one side of the magazine strip and start sticking them onto the cardboard piece in a design pattern of your choice. <br> Step3: Once the glue is dry, cover the entire surface with contact paper to protect the magazine strips and give a glossy finish. <br> Step4: Use …	inefficient
1312	You're having a picnic in the dining room and accidentally knock over a bottle of mustard, causing a large sticky mess on the floor. The only items available are a napkin, a spatula, a plastic fork, a piece of bread, a stack of paper plates, and a sponge that is soaked in a soapy solution. How can you effectively clean up the mustard spill without leaving any residue behind using only these items?	Yes	unconventional	Step1: Use the piece of bread to soak up as much mustard as possible. <br> Step2: Use the napkin to wipe up the remaining mustard. <br> Step3: Use the soapy sponge to scrub the area clean. <br> Step4: Use the paper plates to scrape up the soapy mustard mixture and dispose of it. <br> Step5: Use remaining clean paper plates to dry the area.	efficient
1313	During a family dinner, you accidentally knock over a lit candle and it starts a small fire on the table. The only items available are a stack of dinner plates, a towel, a pitcher of water that is almost empty, a can of soda, a metal fork, and a glass of milk. How can you safely extinguish the fire without causing any additional damage using only these items?	Yes	unconventional	Step1: Grab the pitcher of water and pour it on the fire. <br> Step2: If the fire is not completely out, use the can of soda and pour it on any remaining flames. <br> Step3: Use the towel to smother and extinguish any remaining flames.	inefficient
1314	You're trying to open a tightly sealed jar of pickles during a meal, but you can't get a good grip on the lid. The only items available are a cloth napkin, a thin rubber band that keeps snapping when stretched, a small towel, a spoon, a pen, and a coaster. How can you effectively open the jar without resorting to excessive force using only these items?	Yes	unconventional	Step1: Wrap the small towel around the lid of the pickle jar to get a better grip.<br> Step2: Use your dominant hand to twist the lid open. If the grip is still not good enough, proceed to the next step.<br> Step3: Wrap the rubber band around the cloth napkin-covered lid to further enhance the grip.<br> Step4: Try twisting the lid again. If it's still tight, use the spoon's handle to tap lightly …	efficient
1316	You're cooking a meal in the dining room and accidentally spill a pot of hot soup on the floor. The soup is spreading quickly, and you need to contain it before it reaches other furniture or carpets. The only items available are a non-absorbent foam pad, a plastic spoon, a tablecloth made of a fine mesh material, a pair of rubber gloves, a roll of tin foil, and a stack of paper plates. How can yo…	Yes	unconventional	Step1, put on the rubber gloves for safety to avoid burns from the hot soup. Step2, quickly place the non-absorbent foam pad around the spill to contain it from spreading. Step3, use the stack of paper plates to scoop up as much soup as possible. Step4, cover the remaining spill with tin foil to prevent it from further spreading or soaking into the carpet. Step5, lift the tin foil carefully, trap…	infeasible
1317	You are getting ready for an important meeting but you run out of deodorant. The only available items are a small bottle of hand sanitizer, a cotton handkerchief, a toothbrush, a pair of socks, a candy wrapper, a dried up lemon, and a small container. How can you create a makeshift deodorant using these items?	Yes	unconventional	Step1: Squeeze the dried-up lemon to extract any juice left. <br> Step2: Mix the lemon juice with some hand sanitizer in the small container. <br> Step3: Soak the cotton handkerchief in this mixture. <br> Step4: Use the soaked handkerchief to apply the mixture under your arms. This should help to eliminate odor-causing bacteria. <br> Note: Lemon and hand sanitizer both have antibacterial properti…	infeasible
1318	You are stranded on a deserted island and desperately need to open a coconut to have something to eat. The only available items are a rusty can, a shoe, a round, smooth rock that's hard to grip, a sock, a broken pen, a shoelace, and a plastic bottle cap. How can you open the coconut using only these items?	Yes	unconventional	Step1: Use the shoelace to tie the can to the rock, securing it tightly.<br> Step2: Hold the can's open end towards the coconut.<br> Step3: With force, swing the rock-can apparatus repeatedly against the coconut until it cracks open. <br> Step4: Use the broken pen to further pry open the cracked coconut.	inefficient
1319	You are stuck in a hotel room and realize you forgot your toothbrush. The only available items are a small bottle of mouthwash, a piece of cotton, a washcloth, a food box, a bar of soap, a soft wooden toothpick that splinters easily, and a plastic cup. How can you clean your teeth and maintain oral hygiene using only these items?	Yes	unconventional	Step1: Rinse mouth with mouthwash using the plastic cup. <br> Step2: Wrap the cotton around the wooden toothpick. <br> Step3: Dab the cotton-wrapped toothpick lightly in the soap. <br> Step4: Use this makeshift toothbrush to gently clean teeth. <br> Step5: Use the remaining mouthwash to rinse off the soap. <br> Step6: Rinely wash the mouth with water. <br> Please note that soap is not ideal for o…	infeasible
1323	You want to make a birdhouse for your backyard, but you don't have any woodworking tools. The available items are a metal coat hanger, a bottle of glue, a string of beads, a plastic milk jug, a roll of sandpaper, a wooden pencil, and a blunt small kitchen knife. How can you make a birdhouse using only these items?	Yes	unconventional	Step1: Take the plastic milk jug and cut a small hole near the bottom using the kitchen knife for an entrance. <br> Step2: Use the metal coat hanger to poke two holes on the top of the jug. <br> Step3: Thread the string of beads through the holes to create a hanger. <br> Step4: Use the roll of sandpaper to roughen the outside of the jug for easier grip for the birds. <br> Step5: Use the wooden pe…	infeasible
1324	You want to clean your backyard, but you don't have a rake or a broom. The available items are a piece of cardboard, a plastic bag, a roll of less sticky duct tape, a plastic container, a soup can, a stick, and a wire hanger. How can you clean your backyard using only these items?	Yes	unconventional	Step1: Use the stick and wire hanger to create a makeshift rake by bending the hanger around the stick and securing it tightly with the duct tape.<br> Step2: Use this improvised rake to collect the debris in your backyard.<br> Step3: Use the piece of cardboard as a dustpan to collect the raked debris.<br> Step4: Deposit the debris into the plastic bag or container.<br> Step5: If there are small w…	efficient
1326	You are stuck on a deserted island and desperately need to catch fish for survival. The available items are a few safety pins, a long stick, a plastic water bottle, a hammer, a thin and fragile piece of string, a roll of duct tape, a spoilt radio, and half of a swimsuit. The string is thin and fragile, and may snap under any significant weight. How can you fashion a makeshift fishing rod and bait…	Yes	unconventional	Step1: Straighten the safety pins and attach them to the stick using duct tape to create a rod with hooks.<br> Step2: Use the thin piece of string to tie the plastic water bottle to the end of the stick as a float.<br> Step3: Tear off a small piece of the swimsuit and attach it to the safety pin hooks as bait.<br> Step4: Stand by the water and gently dip the rod into the water to not scare away t…	inefficient
819	You're meeting friends for a picnic in the park. When you arrive, you notice you forgot your bottle opener. You need to open bottles of root beer. Available tools: a spoon, car key, a wooden coaster, a belt with a metal buckle. The metal buckle is round and lacks sharp or distinct edges. How can you open the bottles?	Yes	unconventional	Step1: Hold the bottle by the neck tightly. <br> Step2: Slide the edge of the car key under the edge of the bottle cap.<br> Step3: Apply a firm upward force on the car key, leveraging against your other hand holding the bottle. This should pop the bottle cap off. <br> Tools: Car Key.	efficient
820	You're chowing down on your delicious soup when you suddenly drop the only spoon at a camping dinner. Available tools: a Swiss army knife, a tin can, metal wire, duct tape. The Swiss army knife is blunt, making it hard to manipulate the tin can. How can you create a makeshift spoon?	Yes	unconventional	Step1: Bend the metal wire in the shape of a spoon using hands.<br> Step2: Wrap duct tape around the wire to form the handle. <br> Step3: Cut a piece of the tin can using the Swiss knife, bend it into a small bowl-like form.<br> Step4: Attach the tin piece to the wire with duct tape to form the spoon.<br> Tools used: Swiss Army Knife for cutting tin, Metal Wire for the framework, Duct Tape for at…	infeasible
821	You have a can of beans for your picnic and realize you have forgotten your can opener. Available tools include a bread knife, a beer bottle cap, a big rock, a steel spoon. The bread knife is very dull and too thick to pierce the metal can. How can you open the can?	Yes	unconventional	Step1: Place the can on a stable surface.<br> Step2: Using the steel spoon's edge, start rubbing against the can's top edge strenuously. This will generate heat due to friction causing the metal to weaken.<br> Step3: Once the metal softens or thins, apply pressure downward using the spoon to puncture the weakened spot. Rotate the spoon around the perimeter to widen the opening. Continue this unti…	infeasible
822	You have takeout, but they didn't give you any chili sauce, and you absolutely need it for your meal. You have a packet from your previous outing but no way to open it. Available tools: a car key, a drinking straw, a pen, a rubber band. The chili sauce packet is made of very thick, hard plastic. How can you open the chili sauce packet?	Yes	unconventional	Step1: Hold the chili sauce packet tightly between your fingers.<br> Step2: Use the sharp end of the car key to pierce the top corner of the chili sauce packet. Apply enough pressure to create a small hole. <br> Step3: Squeeze the packet to pour out the chili sauce.	inefficient
823	You're hiking and would like to eat your boiled eggs, but they're too hot to peel. Available tools: a blanket, a water bottle, a sock, a hat. The blanket is a traditional down-filled type which can't be wet. How can you cool the eggs quickly to peel them?	Yes	unconventional	Step1: Unscrew the top off your water bottle.<br> Step2: Carefully put the hot boiled eggs into the water bottle.<br> Step3: Screw the top back on the bottle and then shake the bottle gently to make sure the cold water contacts all parts of the eggs.<br> Step4: Wait for a few minutes, then you can take out and peel the eggs.	infeasible
824	During a beach picnic, you realize that you have forgotten your makeshift table. Available tools: a wooden board that is uneven, four water bottles, each of different sizes, and a roll of duct tape. How can you make a makeshift table?	Yes	unconventional	Step1: Place the water bottles on the sand in a square formation, each representing a support for the table corners. <br> Step2: Position the wooden board on top of the water bottles. The board should balance if you evenly distribute weight.<br> Step3: Use the duct tape to secure the board to the bottles to increase stability. Make sure to wrap the tape thoroughly around each contact point for be…	inefficient
825	You need to squeeze some lemons onto your seafood but don't have a lemon squeezer. Available tools: a fork with short tines, a plastic bag, and a water bottle with a small opening. How can you squeeze the lemons?	Yes	unconventional	Step1: Cut the lemon in half with a knife. Use the water bottle to squeeze each half of the lemon, capturing the juice in the bottle.<br> Step2: Use the fork to poke the lemon halves to get more juice out. <br> Step3: When all the juice is collected, pour it on your seafood through the small opening of the bottle.	infeasible
826	You forgot your grilling tools at home and all you have is chicken to BBQ. Available tools: a camping shovel that is rusted and not fit for food contact, a delicate metal coat hanger, food skewers. How would you grill the chicken pieces?	Yes	conventional	Step1: Disassemble the metal coat hanger if possible. <br> Step2: If the coat hanger cannot be disassembled, wrap the delicate sections with multiple layers of foil.<br> Step3: Thread chicken pieces onto the food skewers.<br> Step4: Place the skewers across the unfolded or foil-wrapped hanger, creating a makeshift grill rack.<br> Step5: Position the setup over the BBQ and cook the chicken, turnin…	infeasible
827	You're at a picnic and spill red wine on your white shirt. Available tools: a crumbly slice of bread, a bottle of flat seltzer water, a coarse sea salt. How will you remove the stain?	Yes	conventional	Step1: Blot the stain gently with the slice of bread to absorb as much wine as possible. <br> Step2: Sprinkle coarse sea salt over the remaining stain, let it sit for a few minutes to draw out the wine. <br> Step3: Rinse the stained area with the flat seltzer water, which could help lift and dilute the stain.<br> Step4: Rinse with water. If possible, launder as soon as you're able.	inefficient
828	You're at a diner and break your only plastic spoon while eating a sundae. Available tools: a straw, paper napkin, a business card that is too small, flimsy stir sticks. How can you create a makeshift scoop?	Yes	unconventional	Step1: Place the business card on top of the napkin.<br> Step2: Roll them tightly together from one corner to create a cone shape. <br> Step3: Use the stir sticks to provide some rigidity to the cone by inserting them inside. <br> Step4: Use the straw to help hold everything together by sliding it inside the cone parallel to the stir sticks. <br> This makeshift scoop may not be perfect, but could…	infeasible
829	The wind keeps blowing away your napkins while picnicking. Available tools: a cup of water, some pebble-like rocks, a cookie jar filled with cookies. How can you keep your napkins from flying away?	Yes	unconventional	Step1: Open the cookie jar.<br> Step2: Empty some cookies from the jar.<br> Step3: Place the napkins in the jar.<br> Step4: Put back the cookies on top of the napkins.<br> Step5: Close the cookie jar.	inefficient
830	You want to enjoy hot dogs on your camping trip, but you forgot the skewers. Available tools: tree branches that are either too thick or too thin, a blunt pocket knife, roll of aluminum foil. How can you cook your hot dogs?	Yes	conventional	Step1: Use the blunt pocket knife to strip the bark from the thicker tree branches until it's thin enough to hold a hot dog but sturdy enough not to bend or break. <br> Step2: Wrap each hot dog tightly in a strip of aluminum foil.<br> Step3: Place the wrapped hot dogs carefully onto the branch.<br> Step4: Roast the branch over the fire, turning occasionally, until the hot dogs are fully cooked.	infeasible
831	You need to cut your pizza but don't have a pizza cutter. Available tools: a drinking glass, a credit card, a Swiss Army knife with a too small blade, and a pizza with a hard crust. How can you cut the pizza?	Yes	unconventional	Step1: Use the credit card to score lines on the pizza where you want to cut it.<br> Step2: Use the Swiss Army knife to follow the scored lines and cut through the pizza. Even if the blade is small, if you have scored the pizza with the credit card, it should be easier.	infeasible
832	You need to reheat your takeaway, but there's no microwave on your camping trip. Available tools: a camping gas stove with a potent flame, aluminum foil, a water bottle, and liquid-based dishes. How can you heat your food?	Yes	unconventional	Step1: Pour the liquid-based food into the aluminum foil creating a makeshift bowl.<br> Step2: Put this foil on the camping gas stove and let it heat until the food is hot enough.<br> Step3: Use the water bottle to pour water on the foil if it gets too hot and starts to burn to avoid a fire.<br> Step4: Once heated, remove the foil from the stove, let it cool for a bit, then enjoy your warm meal.	inefficient
833	You forgot your lettuce dryer, and the greens for your picnic salad are too wet. Available tools: a small towel, a plastic bag, a clothes hanger. How can you dry your salad greens?	Yes	unconventional	Step1: Lay out the small towel on a flat surface. <br> Step2: Spread the salad greens out on the towel. <br> Step3: Roll up the towel gently to help absorb the excess water from the greens. <br> Step4: After unrolling, transfer the greens to the plastic bag, then hang the bag on the clothes hanger and place it in a well-ventilated area to allow any remaining moisture to evaporate.	inefficient
834	Most books in the library are on low shelves, but there is one high occasion when you need to reach a book positioned on a top shelf that is far out of your reach. The usual ladder is unavailable for use. The only tools you have at your disposal are a broomstick, a stack of encyclopedia, and a coat hanger. However, the encyclopedias are too large and wide, making them unstable to stack. How do yo…	Yes	unconventional	Step1: Straighten the coat hanger and attach it securely to the broomstick, extending its length.<br> Step2: Stand on your toes or on an object for extra height if needed.<br> Step3: Using the broomstick and coat hanger combo, slowly nudge the book on the shelf, ensuring that it falls in a retrievable location.	inefficient
836	A loved, well-read book has become worn with time. Its binding has fallen apart and you need to find a way to keep the pages intact and together. The tools at your disposal are a long, rotary phone cord, a shoelace, a belt, and a candle. However, the belt is too short to secure around the book. How should you keep the book pages from falling apart with these tools?	Yes	unconventional	Step1: Use the rotary phone cord by wrapping it around the book lengthwise. <br> Step2: Use the shoelace to then secure the book breadthwise, tying it on top of the phone cord to give additional support. <br> Step3: Melt a small amount of the candle wax and apply it to the knots of the shoelace and phone cord, to prevent them from unraveling.	infeasible
838	You are given the task of organizing books by their size but are left without a ruler or tape measure to help you sort the books. You have resources such as a one-dollar bill, a paper clip chain, your own foot, and a TV remote to help measure. However, the books are considerably small and oversized, making the bill and foot rather inaccurate for measurement. How can you properly measure the book'…	Yes	unconventional	Step1: Choose the smallest item available, which would be the paperclip chain, as your unit of measure. <br> Step2: Use the paperclip chain to measure the length, width, and height of each book by counting how many paperclips it takes to span each dimension.<br> Step3: Sort the books according to the dimensions measured using the paperclip chain.	inefficient
839	Writing on the thousands of book pages in the library has now become a daunting task as you don't have a pen. You are left with eyeliner, a watercolor set, a cut-up soda can, and a piece of coal. Unfortunately, the piece of coal is too large and clumsily shaped for precision, and the eyeliner has dried out. What is your strategy to number the pages?	Yes	unconventional	Step1: Moisten the brush from the watercolor set with water.<br> Step2: Use the edge of the cut-up soda can to scrape some eyeliners, creating a paste.<br> Step3: Dip the moistened brush into the eyeliner paste and proceed to use this makeshift ink to number the pages.	infeasible
841	Bookworms in your library are becoming unhappy because the library has run out of bookmarks. You look around and see a pack of 3x5 index cards, a roll of toilet paper, some breakroom coasters, and a couple of binder clips. But the 3x5 index cards are already written on with important notes and the coasters are too chunky to fit in between the book pages. What do you use as substitute bookmarks th…	Yes	unconventional	Step1: Unroll a suitable length of toilet paper. Step2: Cut or tear this into bookmark suitable lengths. Step3: Secure the edges with binder clips to give your bookmarks some weight and to prevent the edges from fraying. The tools used are a roll of toilet paper and binder clips.	inefficient
842	Reading has become strenuous due to the dim light in the library as the main ceiling light above the reading area goes out. To help you get proper light, you have a flashlight, a piece of aluminum foil, a desk lamp, and a pack of glow sticks. Sadly, the batteries in the flashlight are spent and the cord of the desk lamp is too short to be plugged into the nearest power socket. How do you illumina…	Yes	conventional	Step1: Crack the glow sticks to activate them. <br> Step2: Use the aluminum foil to create a reflecting panel. <br> Step3: Place the glow sticks on one side of the foil and fold it in a manner so that the light from the glow sticks is directed towards your reading area. The aluminum foil will serve as a reflector, providing more light distribution across the area.	inefficient
843	Recently, your desk at the library has begun to wobble interrupting your workflow. You have a stack of old magazines, an unused yoga mat, a roll of packing tape, and a small box of screws at your disposal. However, the stack of old magazines is not thick enough to stop the desk from wobbling. How will you stabilize your desk with these tools?	Yes	unconventional	Step1: Unroll the yoga mat and cut off a section that can fit under the shorter leg of your desk.<br> Step2: Fold the cut section of the yoga mat until it is thick enough to stabilize the desk.<br> Step3: Slide the folded piece of yoga mat under the short leg of the desk until it is level. <br> Step4: If necessary, secure the mat to the leg with the packing tape to ensure it stays in place.	infeasible
844	The children's section door keeps swinging and hitting the bookshelves. Tools available are a pair of wedges and a stack of paperback books. The wedges are too short and the gap between the door and the ground is much wider than the wedges. How would you stop the door from swinging with these tools?	Yes	unconventional	Step1: Stabilize and stack the paperback books on top of each other on the floor below the swinging arc of the door, to a height that stops the door from swinging.<br> Step2: If necessary, slide the smallest wedge under the stack to ensure it doesn't topple easily. This method makes use of the available tools without any damage and will effectively stop the door from swinging.	inefficient
846	The book cart's wheel is jammed and will not roll. Tools available are a nail file, a bag of marbles, a tin of cooking spray, and a package of rubber bands. The wheel is encrusted with a significant amount of rust, making cooking spray ineffective. How would you fix the wheel?	Yes	unconventional	Step1: Use the nail file to scrape off the surface rust from the wheel and axle.<br> Step2: Take a few marbles to jam underneath and on sides of the wheel creating a temporary rolling mechanism. Also use rubber bands to ensure the marbles stay in place.<br> Step3: If necessary, spray cooking spray on the axle and wheel edges for lubrication and smoother movement. This may not fully fix the rusted…	inefficient
847	You need to transport a pile of books from one side of the library to the other, but the book trolley is broken. Tools available include a skateboard, a large bed sheet, a roll of duct tape, and coat hangers. The floor of the library is uneven and old, making it impossible to use the skateboard. How would you shift the books?	Yes	unconventional	Step1: Spread the large bed sheet on the floor. <br> Step2: Place the books in the center of the bed sheet. <br> Step3: Using duct tape, attach the coat hangers to each corner of the sheet forming handles.<br> Step4: Lift the makeshift bag by the coat hanger handles and move the books to the desired location.	infeasible
848	The library's computer has frozen and you need to unplug it, but the plug is stuck. Tools available are a spoon, a plastic ruler, a pair of rubber gloves, and a pack of stubby pencils. The plug is trapped in a somewhat cramped space behind the computer desk, making it difficult to get a grip on it with your hand. How would you unplug the computer under these conditions?	Yes	unconventional	Step1: Put on the rubber gloves for safety to avoid any electrical shock.<br> Step2: Use the plastic ruler to push the computer plug out of the socket by applying pressure on it from a suitable angle. <br> Step3: If the ruler is not successful, use the spoon to create a better leverage and apply more force to unplug the computer.	inefficient
980	You're moving and must pack a tall lamp that doesn't fit in any boxes you have. You only have wrapping paper, a large blanket, a pool noodle, a box of aluminum foil, a roll of twine, some newspapers, a pack of cotton balls. The issue here is that the pool noodle is too narrow to fit over the lamp, and the newspapers could potentially scratch the lamp's surface. How do you pack the tall lamp for m…	Yes	unconventional	Step1: Wrap the lamp in the large blanket for protection.<br> Step2: Secure the blanket with twine.<br> Step3: Wrap the lamp in several layers of aluminum foil for further protection.<br> Step4: Secure the aluminum foil with more twine.<br> Step5: Use the cotton balls to plug in any areas that might still be vulnerable.<br> Step6: Wrap the entire thing in wrapping paper and secure with twine.	inefficient
981	You need to pack your large guitar in a bag that's slightly too small. You have a tape measure, safety pins, fabric scraps, rubber bands, old socks, a broken scissor, and pieces of foam. However, all of the fabric scraps are silk, which does not provide enough cushioning for the guitar. How can you safely pack your guitar using these items?	Yes	unconventional	Step1: Use the broken scissor to cut the foam into smaller pieces that can fit into the bag. <br> Step2: Place the foam pieces at the bottom of the bag and around the sides. <br> Step3: Put the guitar in the bag, and fill any remaining spaces with balled-up old socks for extra cushioning. <br> Step4: Secure the bag around the guitar using rubber bands and safety pins, ensuring the guitar is snug …	infeasible
982	You want to pack a large, heavy pot but don't have a box sturdy enough to hold it. You have a spatula, bubble wrap, a laundry basket, pegs, large kitchen towels, a roll of twine, and a thick rubber mat. However, the laundry basket has many large holes in its sides. How would you pack the pot using only these items?	Yes	unconventional	Step1: Place the rubber mat at the bottom of the laundry basket for cushioning. Step2: Wrap the pot with bubble wrap. Step3: Place the wrapped pot into the laundry basket. Step4: Cover the sides of the basket with kitchen towels to fill in the holes and secure with pegs. Step5: Use twine to secure the towels and pot within the basket, ensuring a snug fit.	inefficient
983	You need to pack a delicate mirror, but you don't have any bubble wrap or packing paper. You have a bath towel, a door mat, a few pairs of jeans, a yoga mat, plastic wrap, a mattress pad, and duct tape. Note that the plastic wrap is old and no longer sticks to itself or other items. How do you pack the mirror using only these items?	Yes	unconventional	Step1: Place the mirror on the mattress pad.<br> Step2: Wrap the mirror and mattress pad together in the yoga mat.<br> Step3: Secure the yoga mat with duct tape.<br> Step4: Wrap the mirror, mattress pad, and yoga mat in the bath towel.<br> Step5: Secure the bath towel with duct tape.<br> Step6: Use the door mat and jeans to fill any extra space in the box. <br> Step7: Place the wrapped mirror in …	inefficient
984	Your toolbox is just out of reach on a high shelf in the garage. The only objects around you are an old skateboard, a fishing rod, a stepladder with a broken step, a mop, a broom, a rope, an extension pole, and a set of golf clubs. Note that the toolbox weighs too much for the broom and rope to handle. How do you get the toolbox down?	Yes	conventional	Step1: Use the skateboard as a makeshift dolly to transport the broken stepladder closer to the shelf.<br> Step2: Climb the stepladder carefully avoiding the broken step to reach the height of the shelf.<br> Step3: Use the extension pole to gently push the toolbox off the shelf, ensuring it falls onto the skateboard below.<br> Step4: Descend the ladder safely.<br> Step5: Use the skateboard to tra…	infeasible
985	You need to clean up a pile of sawdust in your garage, but you don't have a vacuum cleaner. Your tools are a bucket, a leaf blower, a drill, masking tape, a broom, a piece of cardboard, a water hose, a garbage bag, and a dustpan. The broom bristles are worn out and aren't able to collect smaller particles of sawdust. What can you do?	Yes	unconventional	Step1: Use the leaf blower to move the sawdust into one corner of the garage.<br> Step2: Use the piece of cardboard as a makeshift broom to scoop the sawdust into the dustpan.<br> Step3: Empty the dustpan into the garbage bag.<br> Step4: Repeat steps 2 and 3 until all sawdust is collected.	infeasible
987	You have to protect an antique wooden chair from rainwater leaks in your garage. Items available are a tarpaulin, a roll of aluminum foil, duct tape, a plastic bucket, a torn raincoat, a can of waterproof spray but without a nozzle, shower curtain, and an umbrella with a broken handle. The problem is that the broken umbrella can't support any weight. How do you protect the chair?	Yes	unconventional	Step1: Cover the chair with the shower curtain. <br> Step2: Use the duct tape to secure the shower curtain around the chair, ensuring no part of the chair is exposed.<br> Step3: Lay the tarpaulin on the ground and place the chair on top of it.<br> Step4: Lift the edges of the tarpaulin up, creating a shield around the chair. <br> Step5: Secure the tarpaulin with more duct tape. <br> Tools: Shower…	inefficient
991	Your garage door is squeaky and requires lubrication. The only problem is you don't have any lubricating oil. The items you have on hand include a pair of chopsticks, an old t-shirt, some fishing line, a roll of packing tape, climb chalk, an old shoelace, and a stick of butter. The butter is frozen and extremely hard, it can't be immediately applied to the garage door. What do you do?	Yes	unconventional	Step1: Use the chopsticks to scrape off some butter from the frozen stick.<br> Step2: Rub the scraped butter onto the old t-shirt.<br> Step3: Use the t-shirt to apply the butter onto the squeaky parts of the garage door.<br> Step4: Open and close the garage door a few times to spread the butter evenly. The friction will help melt the butter and lubricate the door.	infeasible
992	You need to create a temporary tool wall in your garage, but you don't have hooks or nails for hanging. Available items are duct tape, an old tarp, zip ties, a bag of golf tees, bungee cords, some leftover styrofoam, old belts, and a wooden pallet. The wooden pallet is very weak and brittle, and could break under too much weight. How can you make a tool wall?	Yes	unconventional	Step1: Use duct tape to affix the tarp to the wall, creating a sturdy background.<br> Step2: Attach old belts to the tarp with duct tape, making sure they are tight and secure.<br> Step3: Use the zip ties to fasten tools to the belts. <br> Step4: Use the bungee cords as additional support if necessary, securing them with duct tape. <br> Avoid using the wooden pallet due to its fragility, and the …	infeasible
993	You've received a large ice sculpture for the party that needs to be kept cold, but the refrigerator is not big enough. You have access to a large quilt, a folding chair, a picnic cooler, a garden hose, a flashlight, a small plastic pool, and a roll of aluminium foil. The small plastic pool has a hole in it and leaks water. How do you keep the ice sculpture cold using these items?	Yes	unconventional	Step1: Line the picnic cooler with the aluminum foil to reflect cold back onto the ice.<br> Step2: Fill the cooler with pieces of the ice sculpture that can fit inside.<br> Step3: Wrap the larger part of the ice sculpture with the quilt to insulate it.<br> Step4: Use the garden hose to keep the sculpture wet, as the evaporation will cool it.<br> Step5: Use the flashlight for visibility when neces…	infeasible
999	You're on a beach picnic and realize you've forgotten to bring cutlery to serve your salad. The tools available to you are a kite, a beach ball, a bottle of sunscreen, an empty soda can, a beach umbrella, a Frisbee, a novel, and a bucket and spade. The Frisbee is very small, making it too tiny to hold the salad. How can you serve your salad using only these items?	Yes	unconventional	Step1: Clean and dry the bucket thoroughly.<br> Step2: Pour the salad into the bucket.<br> Step3: Use the spade as a serving scoop.	infeasible
1000	While digging a hole in the sand, you find a small bottle buried with a message inside. However, you can't get the message out. Tools available include a bandana, a towel, snorkeling goggles, a pair of flip-flops, a hat, a mesh bag, a beach ball, a picnic basket, and a sunscreen bottle. The sunscreen bottle is nearly empty, providing nowhere near enough liquid to fill the bottle. How would you re…	Yes	unconventional	Step1: Use the towel to shield your hands from broken glass. <br> Step2: Break the bottle with the flip-flops. <br> Step3: Carefully remove the message with the help of the towel.	inefficient
1002	You have caught fish in the sea but have nothing to carry it with. Items available to you are a swimming costume, broken sunglasses, a beach hat, an inflatable pool noodle, a beach ball, a beach bag filled with towels, sandals, and a water bottle. The beach bag is woven and has plenty of holes, the beach ball is inflatable and cannot sustain any weight, the swimming costume is a bikini, and the s…	Yes	unconventional	Step1: Empty the beach bag of its contents. <br> Step2: Use the towels to line the interior of the beach bag, covering the holes. <br> Step3: Place the fish atop the towel-lined beach bag. <br> Step4: Carry the bag gently to avoid any damage to the fish or the bag.	efficient
1004	You decided to sunbathe but forgot to bring your sun hat. Items available are a snorkeling fin, a hammock, a beach bag with a swimmies/water wings, a book, a paddleball set, a bottle of beach sand, and a long beach towel. The beach towel is a small hand towel and not large enough to provide adequate protection from the sun, the paddleball set doesn’t offer enough shade, the dictionary book is sma…	Yes	unconventional	Step1: Inflate the swimmies/water wings from the beach bag. <br> Step2: Place the snorkeling fin in the beach bag for stability.<br> Step3: Drape the beach towel over the snorkeling fin, using the inflated swimmies to secure the towel in place and create a makeshift hat to protect yourself from the sun.	infeasible
1005	You have found a treasure map drawn on a faded, brittle piece of aged paper. You want to protect it from water and have a can of iced tea, a starfish, a snorkel, a beach chaise lounge, a towel, sunscreen lotion, a rash guard, and a surfboard wax. The sunscreen is a spray-on that sprays a fine mist, the iced tea can is half-empty and cannot sufficiently cover the map, the towel is a small hand tow…	Yes	unconventional	Step1: Lay the map on the beach chaise lounge to keep it off the ground. <br> Step2: Use the hand towel to cover and protect it from any potential water splashes. <br> Step3: Apply a layer of the sunscreen spray to the towel to provide additional water resistance. <br> Step4: Place the starfish on top of the towel to prevent it from blowing away.	inefficient
1006	You would like to create a thin stream of water in your backyard to examine flow patterns, but you don't have a standard water hose. Tools available include a hammock, a bottle of soda, a hollow pool noodle, an empty flowerpot, a large plastic bucket, a watermelon, a tube of toothpaste, a paperclip, and a garden trowel. The pool noodle has a large tear down its side making it leak water from all …	Yes	conventional	Step1: Fill the large plastic bucket with water. <br> Step2: Twist the cap off the soda bottle. <br> Step3: Pour the water from the bucket into the soda bottle. <br> Step4: Hold the soda bottle at an angle or upside down to create a thin stream of water.	inefficient
1007	You want to create a splash of water at a specific point in your swimming pool but can't enter the water. Available tools: a pool noodle, a skateboard, a frying pan, a large flat piece of cardboard, a barbell, a long thin bamboo stick, a life jacket, a heavy rock, and a balloon filled with water. The stick is too weak and inflexible to support the water-filled balloon, the barbell is too heavy to…	Yes	unconventional	Step1: Place the skateboard at the edge of the pool. <br> Step2: Position the frying pan on the skateboard, handle facing out. <br> Step3: Use the cardboard as a ramp, one end on the ground, the other on the pan. <br> Step4: Roll the heavy rock down the cardboard ramp, hitting the pan. <br> Step5: The pan will act like a catapult, splashing the water at the specific point in the pool.	infeasible
1008	You wish to fill a water balloon for an upcoming outdoor game, but you do not have access to a faucet or a hose. Tools available: a pot of sandwich spread, an empty soda bottle, a roll of duct tape, a pair of latex gloves, a picnic blanket, a gardening trowel, a full cooler box with drain spout. The cooler box's drain spout is damaged and won't let out water, the picnic blanket is a woolen blanke…	Yes	conventional	Step1: Empty the sandwich spread from the pot and clean it using the woolen blanket.<br> Step2: Use the trowel to scoop out ice from the cooler box and put it in the cleaned pot.<br> Step3: Wait for the ice to melt, then pour the water into the empty soda bottle.<br> Step4: Cut off one of the fingers of the latex glove, place the water balloon over the cut-off finger.<br> Step5: Secure the balloo…	inefficient
1327	You are trapped in a collapsed building after an earthquake. The available items are a brittle and rusted metal bar, a rope, a roll of duct tape, a broken calculator, an empty can, a piece of plywood, and a hammer. The metal bar is rusted and brittle, and can't withstand much force. How can you create a makeshift lever to move heavy debris and free yourself?	Yes	unconventional	Step1: Use the hammer to flatten the empty can into a sheet.<br> Step2: Use duct tape to attach the flattened can to the brittle metal bar for reinforcement.<br> Step3: Use the piece of plywood as the fulcrum.<br> Step4: Place the reinforced bar on the plywood and use it as a lever to lift the heavy debris.<br> Step5: Secure the lifted debris using the rope.	inefficient
1332	In your garage, you have a heap of tangled extension cords that you need to untangle and organize. However, the cords are all twisted and interlocked with each other. The available items are an old CD, a roll of string, a cracked wooden plank, a wire coat hanger, a rubber band, a box cutter, and a deflated basketball. One of the extension cords is connected to an essential home appliance that nee…	Yes	conventional	Step1: Use the box cutter carefully to cut the roll of string into different lengths. <br> Step2: Slowly and cautiously begin to untangle the cords, being careful not to pull or tug at the cord that is connected to the essential appliance. <br> Step3: Once untangled, wrap each cord separately using the cut pieces of string to keep them neat and prevent future tangles.<br> Step4: Use the wire coat…	inefficient
1335	You have a bookshelf that is cluttered with books, magazines, and papers. However, you want to neatly organize them based on different categories. The available items are a pair of scissors, a ruler, a paper clip, a pair of sunglasses, a cube of ice, a rubber band, and a tennis racket. All paper clips are rusted and cannot be used for labeling. How can you efficiently categorize and organize the …	Yes	conventional	Step1: Use the ruler to measure the lengths of the books, magazines, and papers. <br> Step2: Arrange them in ascending or descending order of size.<br> Step3: Use the rubber band to bundle each category together. <br> Note: The other items (scissors, sunglasses, cube of ice, and tennis racket) are not necessary for this task.	infeasible
1336	You have a collection of CDs and DVDs that are all scratched and need to be cleaned. However, you don't have any cleaning solution or specialized cleaning equipment. The available items are a cotton swab, a feather duster, a bottle of sparkling drink, a metal bar, a plastic spoon, a microfiber cloth, and a bottle of water. However, there is limited supply of water. How can you effectively clean t…	Yes	conventional	Step1: Dampen the microfiber cloth with a little water.<br> Step2: Gently clean the CDs and DVDs with the damp microfiber cloth in a straight line from the center to the edge, not in a circular motion.<br> Step3: Use the dry part of the microfiber cloth to dry the CDs and DVDs.<br> Note: The other items (cotton swab, feather duster, sparkling drink, metal bar, plastic spoon) are not suitable for …	efficient
1338	Your garden is cluttered with fallen leaves and small twigs, making it difficult to plant new flowers or vegetables. However, you don't have a rake or a leaf blower. The available items are a plastic bag, a broom, a pair of garden shears, a large serving spoon, a trowel, a watering can, and a fork. The fallen leaves and twigs are wet and slippery. How can you efficiently clear the garden and crea…	Yes	conventional	Step1: Use the broom to gather the leaves and twigs into a pile. <br> Step2: Use the garden shears to cut larger twigs into smaller, manageable pieces. <br> Step3: Use the trowel to scoop the leaves and twig pieces into the plastic bag. <br> Step4: If necessary, use the large serving spoon or fork to pick up any remaining leaves and twigs. <br> Step5: Dispose of the debris in the plastic bag. <br…	inefficient
1339	You are visiting a remote island and realize you have forgotten your hairbrush. The available items are a piece of cardboard, a broken comb, a toothbrush, a rubber band, a towel, a hair dryer, a fork, and a bottle of sunblock. How can you style your hair without a brush using only these items?	Yes	unconventional	Step1: Wet your hair slightly using the towel.<br> Step2: Use the broken comb to detangle and comb your hair as much as possible.<br> Step3: Use the toothbrush to smooth out any smaller tangles or to style specific smaller sections.<br> Step4: If needed, use the rubber band to secure your hair in a ponytail or bun.<br> Step5: Use the hair dryer to dry and style your hair.<br> Step6: Apply sunbloc…	infeasible
1340	You are camping and noticed that your hair has become extremely oily. Unfortunately, you don't have any shampoo or dry shampoo available. The available items are a plastic bag, a towel, a mirror, a sleeping bag, a spray bottle, cornstarch, a bottle of water, and lemon juice. However, you have dyed hair and the lemon juice can change your hair color. How can you effectively get rid of the oil in y…	Yes	unconventional	Step1: Pour some cornstarch into a plastic bag.<br> Step2: Dip your oily hair into the bag, making sure all areas are coated.<br> Step3: Rub the cornstarch into your scalp and hair, it will absorb the oil.<br> Step4: Shake out as much cornstarch as you can.<br> Step5: Wet the towel with some water from the bottle.<br> Step6: Use the wet towel to wipe out the remaining cornstarch from your hair. T…	inefficient
1342	You have a big event to attend, but you realize your curling iron is not functioning. The available items are aluminum foil, a heat-resistant glove, a lipstick, a wire hanger, a hand mirror, a set of earrings, a straightening iron, and a butter knife. Unfortunately, the straightening iron is meant for professional kiosk use and does not have an option to adjust the heat setting to a lower level. …	Yes	unconventional	Step1: Put on the heat-resistant glove.<br> Step2: Straighten the wire hanger and wrap it in aluminum foil. The foil will help distribute heat evenly.<br> Step3: Heat the aluminum-wrapped hanger using the straightening iron.<br> Step4: Wrap sections of hair around the heated hanger, hold it for a few seconds, then carefully unwrap. Repeat for all hair.<br> This method utilizes the straightening i…	inefficient
1343	You are on a camping trip, and the heat and humidity have made your hair incredibly frizzy. Unfortunately, you don't have any anti-frizz products or hair serum. The available items are a safety pin, a spray bottle, a tent, a hairbrush, a camping chair, a plastic bag, a thermos, and coconut oil. The problem is that the coconut oil is in a solid form at room temperature and won't pass through the n…	Yes	conventional	Step1: Heat up the coconut oil in the thermos by filling the thermos with hot water, then putting the coconut oil in. <br> Step2: Once the coconut oil has melted, pour it into the spray bottle. <br> Step3: Spray the coconut oil onto your hair and brush it through with the hairbrush to distribute it evenly. This should help to tame the frizz.	infeasible
1344	You accidentally cut your bangs too short, and you don't want to wait for them to grow out. The available items are a headband, a piece of paper, an eraser, a notebook, a pair of scissors, hair gel, a pencil, and heavy metal hair clips. However, the hairclips are special designed full metal clips which are too heavy to hold your short bangs. How can you style your bangs to hide the mistake using …	Yes	conventional	Step1: Use the hair gel to slick your bangs back. <br> Step2: Use the headband to secure your bangs in place.	efficient
1345	You are at the beach, and your hair has become extremely tangled due to the wind and saltwater. Unfortunately, you don't have a detangling spray or conditioner. The available items are a hair tie, a hat, a spray bottle with water, a seashell, a wide-tooth comb, a beach towel, aloe vera gel, and sunglasses. The issue is that the aloe vera gel is in capsules for consumption and cannot be mixed with…	Yes	conventional	Step1: Wet your hair using the spray bottle with water to add some moisture.<br> Step2: Apply aloe vera gel capsules directly to your hair by breaking them open and squeezing out the gel.<br> Step3: Use the wide-tooth comb to gently detangle your hair starting from the ends and working your way up to the roots.	infeasible
1346	You are getting ready for a formal event, and your hairdryer suddenly stops working. The available items are a shoelace, a clothes iron, a towel, a choker, a hand fan, a blazer, a plastic bag, and perfume. The only towel available, however, is an extremely absorbent microfiber towel dedicated to professional swimmers, which quickly becomes too wet to use. How can you dry your hair without a haird…	Yes	conventional	Step1: Use the microfiber towel to blot as much water out of your hair as possible until the towel becomes too wet.<br> Step2: Use the hand fan to fan your hair to speed up the air-drying process.<br> Step3: If your hair is still damp, you can use the clothes iron to lightly press your hair. Note: Be sure to use the lowest heat setting to avoid damaging your hair and never let the iron touch your…	infeasible
1348	You are playing soccer and the goal net tears apart. Unfortunately, there is no replacement net available. The available items are a pair of cleats, a bicycle tire, a bungee cord, a hula hoop, a yoga mat, a soccer ball, a pool noodle, and a water bottle. However, the pool noodle is a transparent one filled with glitter and is very thin and flimsy. How can you repair the torn goal net using only t…	Yes	unconventional	Step1: Use the bungee cord to sew the torn parts of the net together. <br> Step2: If the tear is too wide, use the bicycle tire to fill the gap. Secure it with the remaining parts of the bungee cord.<br> Step3: If the net is still not secure enough, use the hula hoop as reinforcement, attaching it to the top of the goalpost. Secure it with the cleats. <br> (Note: The yoga mat, soccer ball, water …	infeasible
1351	You are at the golf course, and the grip on your golf club becomes loose and unusable. However, you have a towel, a foam pipe insulation that is only enough for half of the club handle, a tennis grip, a bike handlebar grip, a teeing ground, a rubber band, a golf glove, and a golf ball. How can you repair the golf club grip using only these items?	Yes	unconventional	Step1: Use the towel to clean the handle of the golf club thoroughly.<br> Step2: Wrap the half-length foam pipe insulation around the top half of the club handle.<br> Step3: Secure the foam insulation with the rubber band.<br> Step4: Wrap the tennis grip around the foam insulation and the remaining half of the club handle.<br> Step5: Use the bike handlebar grip to cover the tennis grip.<br> Step6…	inefficient
1353	You are at the basketball court, and the backboard breaks, making it impossible to play a proper game. However, you have a ragged, hole-ridden plywood board, a trampoline, a basketball, a pair of basketball shoes, a pool noodle, a water bottle, and a yoga strap. How can you create a makeshift basketball backboard using only these items?	Yes	unconventional	Step1: Place the plywood board against the trampoline's stand. <br> Step2: Use the yoga strap to secure the board to the stand, ensuring it is tight and sturdy. <br> Step3: Cut the pool noodle lengthwise and attach them on the edges of the plywood board for safety using the remaining yoga strap. <br> Step4: Mark the basket location on the plywood with the basketball shoes.	infeasible
1356	In a physics lab, you are tasked with measuring the coefficient of friction between two surfaces. However, the force sensor you planned to use is not working and the ruler only has marks for every 10cm. The available items are a protractor, a pair of safety goggles, a nail, a pencil, some sandpaper, a set of weights, a rubber band, a stopwatch, and a ruler. How can you measure the coefficient of …	Yes	unconventional	Step1: Use the sandpaper, weights, and protractor to set up an inclined plane. <br> Step2: Place the weight on the sandpaper and slowly increase the angle of the plane until the weight begins to slide. <br> Step3: Use the protractor to measure the angle at which the weight began to slide. <br> Step4: Calculate the coefficient of static friction using the formula µ=tan(θ), where θ is the angle mea…	efficient
882	You caught a fish while snorkeling and want to put it back in the sea without being bitten. Tools available: two frisbees, a beach ball, a handheld fan, a snorkel tube, a beach hat, a pair of goggles, a plastic spade, and a picnic blanket. But the picnic blanket is already wet and the frisbees are cracked. The goggles are missing a strap, making them unsuitable for use. You caught a fish while sn…	Yes	unconventional	Step1: Use the plastic spade to gently scoop up the fish. <br> Step2: Use the handheld fan to keep the fish moist by fanning water onto it during the transfer. <br> Step3: Gently tip the spade into the sea to let the fish swim out, ensuring you do not get bitten.	efficient
883	You want to collect some seashells but don't have a bucket. How do you create a container to hold the shells using these items? The poncho has tears in it, making it unsuitable for holding objects while the sunscreen spray is empty. You want to collect some seashells but don't have a bucket. You have a rain poncho, a beach hat, a sunscreen spray, a roll of plastic wrap, a pair of sunglasses, an e…	Yes	unconventional	Step1: Take the beach hat and turn it upside down. <br> Step2: Use the roll of plastic wrap to cover the inside of the hat entirely, this creates a plastic lining that will hold the shells. <br> Step3: Fill the lined hat with the seashells you collect.	inefficient
884	A crab is stuck in your beach bag that you accidentally left open. The crab is angry and ready to pinch. A soda can, a pair of sun glasses, a bucket hat, a novel, a fabric bag, a pair of flip flops, a bottle of sunscreen, and a beach towel are at your disposal. Unfortunately, the beach towel is small, barely larger than a hand towel, therefore does not offer sufficient protection. The novel's pag…	Yes	unconventional	Step1: Place the small beach towel on the ground, this will serve as a safe landing area for the crab.<br> Step2: Hold the bucket hat by its string, use it to cover the opening of the fabric bag.<br> Step3: Invert the bag and shake gently until the crab falls onto the beach towel.<br> Step4: Use the pair of flip flops to safely pick up the beach towel corners, lifting the crab without touching it…	inefficient
885	You want to make a sun dial to judge time, but you have no sharp objects to make the gnomon. Available items are a hand mirror, a rubber band, a beach towel, a paper plate, a swim cap, a water bottle, a plastic spoon, a flip flop, and an inflatable ring. The trouble is, the water bottle is a collapsible one, does not stand upright. The inflatable ring has a leak, making it unable to hold air. You…	Yes	unconventional	Step1: Use the hand mirror as the sundial base.<br> Step2: Fill the collapsible water bottle with sand or small stones to make it stand upright.<br> Step3: Use the rubber band to secure the water bottle on the mirror in an upright position.<br> Step4: Use the shadow of the water bottle to tell the time. The shadow will move as the sun moves across the sky.	infeasible
886	You noticed a few nuts and bolts from a street sign have become loose and may fall onto the sidewalk, posing a potential danger. You only have an old newspaper, a carabiner, a big paperclip, a plastic bag, a shoe lace, a pencil, a credit card, and an umbrella. Yet, the paperclip is rusted and the shoelace is frayed, making it unreliable. The umbrella doesn't open properly, offering limited functi…	Yes	unconventional	Step1: Use the pencil to tighten the loose bolts as much as you can.<br> Step2: Unfold the paperclip and bend it into a hook shape.<br> Step3: Attach the carabiner to the hook of the paperclip.<br> Step4: Use the carabiner and hooked paperclip to hang the plastic bag over the loose nuts and bolts, catching any that may fall. The credit card and newspaper are not needed.	inefficient
888	During a stroll, you saw an empty drinks can littering the sidewalk, but there is no recycling bin nearby and you don't want to leave it there. You have a wristwatch, a bottle opener, a hand fan, a bandana, a pair of eyeglasses, a bookmark, a nail file, and a paper bag. However, the paper bag is already full of your shopping items and the can is extremely dirty. The nail file is quite dull, provi…	Yes	unconventional	Step1: Use the bandana to pick up the dirty drinks can to avoid direct contact. <br> Step2: Clean the outside of the can using the hand fan (assuming it's a rigid fan), scraping off any loose dirt.<br> Step3: Temporarily place the can in the eyeglasses case for transportation to the nearest recycling bin.	inefficient
890	You are walking along the sidewalk and see a deep crack in the pavement, which could cause someone to trip. All you have is a pair of sock, a tube of tissue paper, a small bottle of drinking water, a notepad, a straw hat, a multicolored markers, a plastic spoon, and a scarf. The sock and the scarf are both light in color and not attention-grabbing. The marker's ink is dried out, making them usele…	Yes	unconventional	Step1: Use the notepad to write a warning about the crack. <br> Step2: Attach the note to the straw hat using the plastic spoon by sticking the handle of the spoon through the paper and into the hat's weave. <br> Step3: Place the hat near the crack on the sidewalk as a visible warning.<br> Step4: Use the scarf to create a barrier around the crack, tying it to nearby stationary objects if availabl…	infeasible
891	You are fixing a bicycle on the street but the screwdriver is missing. Available tools are a ballpoint pen, a wristwatch, a pocket mirror, a keyring, a toothpick, a plastic bag, a large coin, and a hairpin. However, all the screws on the bicycle are of a small size that the large coin is too big to fit into the slots. How can you tighten the screw?	Yes	unconventional	Step1: Use the ballpoint pen and remove the ink tube. <br> Step2: Insert the hairpin into the empty casing of the pen.<br> Step3: Use this improvised tool as a screwdriver to tighten the screw on the bicycle.	efficient
892	A poster you put up on the sidewalk was damaged by wind. You only have a roll of clear tape, a water bottle, a bag of cotton balls, a muffin, a raincoat, a hair spray, a pair of scissors, and a pack of chewing gum wrappers. The wall is made of a material, say stainless steel, that the hair spray doesn't stick well to. How can you attach the poster back up there?	Yes	conventional	Step1: Use the scissors to cut off strips of the clear tape. <br> Step2: Apply those strips to the edges of the poster and press firmly. <br> Step3: Apply the poster to the stainless steel wall, ensuring the tape is making contact with the wall. <br> Step4: Use more clear tape to reinforce the edges if necessary. This method uses only the clear tape and scissors, as the other provided tools are n…	efficient
893	You discover a broken glass bottle on the sidewalk but don't have gloves or a dustpan to remove it safely. Tools available: a paperback novel, a piece of chalk, a box of cereal bars, a pair of sunglasses, a roll of toilet paper, a city map, a plastic spoon, and a water bottle. The glass pieces are small and sharp that a few sheets of toilet paper may not provide enough protection. How would you r…	Yes	unconventional	Step1: Open the box of cereal bars and take out all the bars. <br> Step2: Carefully use the paperback novel to sweep the glass pieces into the empty cereal box. <br> Step3: Use the city map to cover the top of the cereal box to prevent the glass pieces from falling out. <br> Step4: Dispose of the box in a nearby trash can, ensuring no one gets hurt by the broken glass.	efficient
895	You have dropped your only pocket knife into a deep, narrow crevice and can’t reach it with your hands. Tools available to you include a pair of glasses, a stick, a water bottle cap, a fishing hook, a length of paracord, duct tape, a plastic bag, a headlamp, and a metal mug. The crevice is very narrow and winding so that the hook and paracord cannot maneuver easily. How do you retrieve the pocket…	Yes	unconventional	Step1: Attach the duct tape to the end of the stick, sticky side out. <br> Step2: Lower the stick into the crevice and try to get the tape to stick to the pocket knife. <br> Step3: Carefully pull the stick back up, hopefully with the knife attached.	efficient
896	You need to keep raccoons away from your food stores overnight, but you don't have a bear canister. Tools available include a water bottle, a flashlight, a few rocks, a plain tarp, a plastic fork, a pack of cookies, a pair of hiking boots, and a climbing rope. There are no trees tall enough in the vicinity to hang the food out of reach of a raccoon. How can you protect your food using these items?	Yes	unconventional	Step1: Place your food under the tarp.<br> Step2: Use the climbing rope to tightly secure the tarp, tying it securely around the food.<br> Step3: Use the rocks to anchor the rope and tarp to the ground, making it difficult for the raccoons to get under the tarp.<br> Step4: Use your water bottle, flashlight, hiking boots, and plastic fork to further weigh down the edges of the tarp.<br> Step5: Sca…	inefficient
897	A button on your hiking trousers has popped off and lost. Tools available include a nail clipper, a bandana, a pocket knife, a hair tie, a miniature sewing kit, a wooden twig, a piece of duct tape, and a nut from a trail mix. The nut has no holes to thread the sewing needle through it. How can you quickly fix your button in a temporary way using what you have?	Yes	unconventional	Step1: Use the pocket knife to carve two small holes into the nut.<br> Step2: Thread the needle from the miniature sewing kit and pass it through the holes in the nut, securing it to the trousers.<br> Step3: Use the duct tape to secure the new button from the back for added stability.	inefficient
898	You need to signal a passing helicopter but your flares have gotten wet. Tools available include a steel pot, a whistle, a pair of gloves, some aluminum foil, a roll of toilet paper, a pack of batteries, a space blanket, and a piece of tree bark. The helicopter is flying at a great height, making it difficult to see the reflection. How could you signal the helicopter using these items?	Yes	unconventional	Step1: Unfold the space blanket and lay it out flat on the ground as it is highly reflective and can be seen from a great height. <br> Step2: Use the aluminum foil and batteries to start a fire with the toilet paper and tree bark. <br> Step3: Put the steel pot on the fire, making more smoke. <br> The signals of reflective blanket, fire, and smoke could potentially draw the attention of the helico…	inefficient
899	You just bought a new smartphone and need a stand to watch videos, but do not have a phone stand. Available to you are a bottle of hand sanitizer, a coffee mug, a paperback book, a pencil, a safety pin, a set of keys, a pocket mirror, a pair of glasses, and a stack of sticky notes. The stack of sticky notes is too soft and collapses under the weight of the smartphone. How do you create a makeshif…	Yes	unconventional	Step1: Place the coffee mug on a flat surface, handle facing up.<br> Step2: Slide the smartphone into the handle of the mug, leaning the bottom of the phone against the body of the mug. Tools: Coffee mug and smartphone.	infeasible
901	The windshield of your car is full of dirt, and you don't have water or a car wash liquid. Available tools: a can of oil, a plastic bag, a screwdriver, a soda, an umbrella, a towel, and a pair of socks. However, the towel is very small and thin, and the soda is a small can of diet soda. How do you clean the windshield using these items?	Yes	unconventional	Step1: Shake the can of diet soda and open it slightly to make it spray.<br> Step2: Spray the soda all over the windshield. The acid in the soda will break down the dirt.<br> Step3: Use the small towel to wipe off the soda and dirt from the windshield. If necessary, use the pair of socks for additional wiping.	infeasible
902	One of your headlights isn't working and you can't remove the cover. Available tools: a hammer, a rubber glove, a roll of duct tape, a credit card, safety glasses, a metal coat hanger, and a wrench. But the metal coat hanger is twisted in a complicated shape, while the credit card is too thick and the duct tape isn't sticky. How can you remove the headlight cover using these items?	Yes	conventional	Step1: Wear safety glasses to protect your eyes from any potential debris or shards. <br> Step2: Use the wrench to gently tap around the edges of the headlight cover. This might loosen it enough to be removed. <br> Step3: If the cover is still not loose, use the hammer carefully to apply more force. Be careful not to damage the headlight itself. <br> Step4: Use the rubber glove to grip and remove…	inefficient
903	Your wiper blades are smudging the windshield but you don't have a replacement. Available tools: a paintbrush, a tube of plastic adhesive, a bucket, wire cutters, a kitchen sponge, a metal file, and a rubber band. However, the sponge is too hard and large, and the adhesive is not strong enough to stick the sponge to the wiper blade. How can you fix the wiper blades using these items?	Yes	unconventional	Step1: Use the metal file to gently scrape off any debris or rough edges on the wiper blade, improving its contact with the windshield. <br> Step2: Wet the kitchen sponge in the bucket of water, squeeze out the excess, and then clean the wiper blades thoroughly.<br> Step3: Use the paintbrush to apply a thin layer of plastic adhesive on the wiper blades. Allow them to dry fully according to the ad…	infeasible
906	The car's battery terminals are corroded and you have no cleaning tools. Available tools: a toothbrush, a car charger, a flashlight, A can of coke, a piece of cloth, and a pen. However, the Coke can is mostly empty, the toothbrush bristles are too soft and the piece of cloth is heavily stained. How can you clean the terminals using these items?	Yes	conventional	Step1: Pour the remaining Coke onto the corroded terminals. The acid in the Coke will help dissolve the corrosion.<br> Step2: Scrub the terminals with the stained cloth to remove the loosened corrosion.<br> Step3: Dry the terminals using another part of the cloth. <br> Step4: Connect the car charger to ensure the battery is operational. Use the flashlight if needed for better visibility.	inefficient
907	You need to check tire tread depth but don't have a gauge. Available tools: a screwdriver, a flashlight, a tire pressure gauge, a ruler, a penny, and a magnifying glass. However, the penny is worn out, the magnifying glass is cracked and the ruler measures in a unit that is unfamiliar to you. How can you check the tire tread depth with these items?	Yes	unconventional	Step1: Use the screwdriver to mark the edge of the tire tread. Step2: Insert the tire pressure gauge into the tread until it hits the mark on the screwdriver. Step3: Use the flashlight to illuminate the tire pressure gauge, reading the depth from the gauge. This method assumes that the tire pressure gauge has depth measurements as well or can give a relative measurement which can be used to asses…	inefficient
909	You can't open the hood of your vehicle because the cable is broken. Available tools: a wire coat hanger, a car jack, a flashlight, a pair of thick rubber gloves, a tape measure, and a toolbox. However, the flashlight batteries are dead, the wire coat hanger is heavily twisted and the rubber gloves are torn. How can you open the hood using these items?	Yes	unconventional	Step1: Use the toolbox to find a screwdriver or pliers.<br> Step2: Use the screwdriver or pliers to straighten the wire coat hanger.<br> Step3: Insert the straightened wire coat hanger through the grill of the car to reach the latch.<br> Step4: Move the wire around until it catches the latch, then pull up to open the hood. <br> Tool usage: Toolbox, wire coat hanger.	efficient
1122	You have a paper clip, a pair of scissors, a piece of paper, a staple remover, a pencil, a straw, a very short and tight rubber band, a small cup, a glue stick, a ruler, an eraser, a half-full water bottle, and a plastic fork. How can you transfer the water from the bottle to the cup without touching the bottle or pouring the water directly from the bottle into the cup?	Yes	unconventional	Step1: Use the scissors to cut the straw into two equal pieces.<br> Step2: Insert one end of each straw piece into the water bottle. Make sure one straw is deeper than the other.<br> Step3: Use the glue stick to seal around the straws at the bottle opening, creating an airtight seal.<br> Step4: Once the glue dries, blow into the shorter straw. The air pressure will force the water to rise up the …	infeasible
1124	You have a rubber eraser, a magnet, a paper clip, a ruler, a piece of paper, a can opener, a pencil sharpener, a short string, a pen, a highlighter, a pair of scissors, a coin, and a glue stick. How can you determine if the coin is made of a magnetic material without directly touching it with the magnet?	Yes	unconventional	Step1: Attach the paper clip to the string.<br> Step2: Place the coin on the piece of paper.<br> Step3: Hold the string such that the paper clip is hanging above and close to the coin.<br> Step4: Bring the magnet close to the paper clip (without touching it).<br> If the coin is made of a magnetic material, the paper clip will be attracted to it despite the magnet's proximity, thus indicating the …	infeasible
1126	You have two hourglasses. One measures 7 minutes and the other measures 4 minutes but is sealed shut and cannot be turned over. Along with these, there is a digital timer, a sundial and a stopwatch. How can you time 9 minutes exactly?	Yes	conventional	Step1: Start both the 7-minute hourglass and the 4-minute hourglass at the same time.<br> Step2: As soon as the 4-minute hourglass runs out, start the stopwatch.<br> Step3: When the 7-minute hourglass runs out, stop the stopwatch.<br> The time on the stopwatch will be exactly 3 minutes (7-4=3).<br> Step4: Turn the 7-minute hourglass immediately after it runs out.<br> Step5: The sum of the time on…	infeasible
1127	With two buckets, one of 5-gallon and the other of 3-gallon present, additionally there's an empty 1-gallon jug, a hose and a measuring cup. The 5-gallon bucket has a small hole, it leaks when it's more than half full. How do you measure out exactly 4 gallons of water?	Yes	conventional	Step1: Fill the 5-gallon bucket fully. (using hose)<br> Step2: Immediately transfer 3 gallons to the 3-gallon bucket. (using 3-gallon bucket)<br> Step3: The 5-gallon bucket now has 2 gallons due to the leak.<br> Step4: Empty the 3-gallon bucket. (just pour it out)<br> Step5: Transfer the 2 gallons from the 5-gallon bucket to the 3-gallon bucket. (using 3-gallon bucket)<br> Step6: Fill the 5-gallo…	infeasible
1128	You have a 7-pound weight and a balance scale that are accompanied by a set of smaller weights, a kitchen scale, and a larger counterweight. The balance scale is missing its counterweight and cannot balance exactly, only tilt towards the heavier side. How can you still use it to identify which of 3 items is the heaviest?	Yes	conventional	Step1: Label the items as A, B, and C. Place A and B on the balance scale. If the scale tilts, the heavier item is identified. If it doesn't, both are equal in weight.<br> Step2: Replace one of the items on the scale with C. If the scale tilts, C is the heaviest. If not, C is equal to the item it replaced.<br> Step3: If A, B, and C are all equal in weight on the balance scale, use the kitchen sca…	inefficient
1130	A magnet, a metal detector and a weight scale are available apart from the 8 coins you have been given, one among which is lighter than others. All the others weigh the same. The balance scale can only compare two coins at once. How can you find the lighter coin in just 2 weighs using a balance scale?	Yes	conventional	Step1: Use the balance scale to weigh three coins against three other coins. If they balance, the lighter coin is among the remaining two, which can be found in one more weigh. If they don't balance, the lighter coin is among the three lighter ones.<br> Step2: If the lighter coin is among the three, weigh one of them against another. If they balance, the third coin is the lighter one. If they don…	efficient
1131	At a river, you have a boat that can carry you and either 1 chicken, 1 fox or 1 sack of corn at a time. Along with these, there are a rope, a fishing net, and a dog. You can't leave the chicken alone with the fox (the fox would eat it) and you can't leave the chicken alone with the corn (the chicken would eat it). The constraint here is you can't cross the river with the chicken twice in a row. H…	Yes	conventional	Step1: Take the chicken across the river and leave it there.<br> Step2: Return alone to the original side and take the fox across the river.<br> Step3: Leave the fox on the other side, but take the chicken back to the original side.<br> Step4: Leave the chicken on the original side and take the corn across the river.<br> Step5: Leave the corn on the other side with the fox.<br> Step6: Return alon…	efficient
1132	You are in a room with three light switches. Along with these, there's a flashlight, a color filter, and a mirror. Outside the room are three light bulbs, each controlled by one of the switches. You can only go outside the room once. The bulbs are in an enclosure which prevents you from touching them or feeling their heat. How can you tell which switch controls which bulb?	Yes	conventional	Step1: Turn on the first switch and leave it on for few minutes. <br> Step2: Turn off the first switch, then turn on the second switch. <br> Step3: Walk outside the room.<br> The bulb that is on is controlled by the second switch, the bulb that is off and still warm is controlled by the first switch, and the bulb that is off and cool is controlled by the third switch. <br> Note: The flashlight, c…	efficient
1134	You need to cut a piece of string, but you don't have scissors. Here is what you have: a table with sharp edges, a credit card, a pencil sharpener, a bottle cap, and a plastic knife. The constraint here is the credit card is made from a softer, flexible material and not capable of applying pressure. How can you cut the string?	Yes	unconventional	Step1: Hold the string taut on the sharp edge of the table.<br> Step2: Use the plastic knife to apply pressure and saw back and forth on the string where it meets the table edge. The combination of pressure and friction should cut the string.	inefficient
1135	Stove, water, kettle, and uncooked spaghetti are what you have to light a candle, but you don't have a lighter or matches. To make things challenging, you also have a can of cooking oil, an empty beer bottle and a magnifying glass. The uncooked spaghetti is thin and breaks easily when you try to light it. How can you light the candle?	Yes	unconventional	Step1: Turn on the stove. <br> Step2: Put the kettle on the stove and fill it with water. <br> Step3: Put the uncooked spaghetti in the kettle to make it less brittle. <br> Step4: Once the spaghetti is less brittle, dip one end in the cooking oil. <br> Step5: Put the oiled end of the spaghetti on the hot stove to light it. <br> Step6: Use the lit spaghetti to light the candle.	inefficient
1139	How to cook bacon and mushroom pasta with a microwave? I only have the following ingredients: mushroom that are not sliced, water, pasta, and sliced bacon plus a bag of sugar, a pack of instant coffee, and a bottle of ketchup. I have the following utilities: a rope, a fork, a travel mug, a thermos, the microwave, a thin plastic bowl, a microwave popcorn popper, and a thick porcelain mug with a me…	Yes	unconventional	Step1: Put water and pasta in the plastic bowl, microwave until cooked, using the fork to stir occasionally. <br> Step2: Drain excess water using the lid of the travel mug as a makeshift strainer. <br> Step3: Put sliced bacon in the microwave popcorn popper, microwave until cooked. <br> Step4: Slice the mushrooms with the side of the fork, cook in the popper after the bacon. <br> Step5: Combine p…	inefficient
1140	How to fry an egg with only a campfire? I only have the following ingredients: an egg, and seasoning, cooking oil plus a can of beer, some sausages and a head of lettuce. I have the following utilities: a tent, firewood, matches, a collapsible water container, a campfire spot, a metal camping skillet, a camping chair, a metal spatula, and a solar charger. It's a windy day and the matches can't st…	Yes	unconventional	Step1: Use the solar charger to ignite small pieces of firewood (since the matches aren't staying lit due to wind). <br> Step2: Gradually add more firewood to build a bigger fire in the campfire spot.<br> Step3: Place the metal camping skillet over the fire and pour some cooking oil into it.<br> Step4: Crack the egg into the skillet and use the spatula to move it around until it's fully cooked.<b…	infeasible
1141	How to make cheese and crackers? I have got the following ingredients: block of cheese and saltine crackers plus a loaf of bread, some grapes, and a tub of cream cheese. I have the following utilities: a cheese slicer, a bottle of wine, a butter knife, a serving dish, a tray, and a wine opener. The cheese slicer is broken. How can you prepare the cheese and crackers without any other things avail…	Yes	unconventional	Step1: Use the butter knife to slice the block of cheese into thin slices. <br> Step2: Arrange the saltine crackers on the serving dish.<br> Step3: Place the sliced cheese on top of the crackers. <br> Step4: Open the tub of cream cheese using your hands and spread it on the loaf of bread using the butter knife.<br> Step5: Slice the bread, and place it and the grapes on the tray. <br> Step6: Open …	inefficient
1144	How to make a sandwich without an oven or microwave? I have got the following ingredients: two slices of bread, sliced ham, and cheese plus a head of lettuce, a pack of turkey slices, and a jar of mayo. I have the following utilities: a plate, a toaster, a sandwich press, a knife, and a bread bin. The cheese is not pre-sliced. Can you still make a sandwich without any other things available?	Yes	conventional	Yes, it's possible. <br> Step1: Toast the bread slices in the toaster.<br> Step2: While the bread is toasting, use the knife to slice the cheese.<br> Step3: Spread mayo on one slice of toast using the knife.<br> Step4: Layer the ham, turkey, lettuce, and cheese on the mayo-covered toast.<br> Step5: Cover with the second slice of toast.<br> Step6: Place the sandwich in the sandwich press until the…	efficient
1145	How to cook canned beans on an open fire? I only have the following ingredients: canned beans and seasoning plus a bag of rice, a pack of hot dogs and a can of tomato sauce. I have the following utilities: a wooden spoon, a pot, a camping mattress, a portable grill, firewood, a can opener, a camping stove, a sleeping bag, and a lighter. The seasoning spilled and is unusable. Can you cook tasty be…	Yes	conventional	Step1: Use the can opener to open the canned beans and tomato sauce. <br> Step2: Start the fire using firewood and lighter. <br> Step3: Place the pot on the portable grill over the fire. <br> Step4: Add beans, tomato sauce, and hot dogs into the pot. <br> Step5: Stir occasionally with the wooden spoon. <br> Step6: Cook until hot dogs are fully cooked, and the mixture has reached desired consisten…	efficient
1146	How to make popcorn without a popcorn maker? I only have the following ingredients: popcorn kernels, salt, and oil plus a bottle of cider, a box of crackers, and a bag of pretzels. I have the following utilities: an oven mitt, a kettle, a stove, a pot with a lid, a rice cooker, and a toaster. There's very little oil left. How can you make popcorn under this situation without any other things avai…	Yes	conventional	Step1: Put the small amount of oil you have left in the pot.<br> Step2: Add a few popcorn kernels to the oil and put the pot on the stove.<br> Step3: Cover the pot with the lid and heat it over medium heat.<br> Step4: When the kernels pop, remove them from the pot.<br> Step5: Add the rest of the popcorn kernels to the pot and immediately cover it.<br> Step6: Remove from heat when the popping slow…	efficient
1148	You need to wake up at a certain time, but the alarm clock isn't working. You have a baseball, a rubber band, a mirror, a glass of water, a candle, a phone with a broken speaker, a piece of chalk, and a metronome with a broken handle. How do you wake up without any other things available?	Yes	unconventional	Step1: Set a candle to the desired height corresponding to the time you need to wake up. <br> Step2: Place the candle on a non-flammable surface near you.<br> Step3: Light the candle before sleeping. <br> Step4: Place the baseball close to the edge of a table, held back by the rubber band. <br> Step5: Position the candle so that when it burns down to a certain level, the flame will burn through t…	infeasible
1149	You dropped your keys down a narrow drain. You have a plastic bag, a paper clip, a pair of chopsticks, a toothbrush, a weak magnet, duct tape, a length of string, a spoon, and a paper cup. How do you retrieve your keys without any other things available?	Yes	unconventional	Step1: Unfold the paper clip to extend its length. <br> Step2: Attach the weak magnet to one end of the paper clip using duct tape. <br> Step3: Tie the other end of the paper clip to the string. <br> Step4: Lower the magnet end of the paper clip into the drain using the string. <br> Step5: Once the keys are attached to the magnet, gently pull up the string to retrieve the keys.	infeasible
1151	You need to inflate a balloon but you don't have a pump. You have a pencil, an eraser, a straw, a two-liter empty soda bottle, a feather, duct tape, and a piece of rubber tubing full of holes. Can you still inflate the balloon?	Yes	conventional	Yes, it's possible. <br> Step1: Attach the balloon to one end of the straw using duct tape ensuring a tight seal.<br> Step2: Insert the other end of the straw into the soda bottle.<br> Step3: Cover the mouth of the soda bottle tightly with duct tape.<br> Step4: Shake the soda bottle vigorously. This will create pressure inside the bottle.<br> Step5: The pressure will force the air through the str…	infeasible
1152	Your soup is too hot but you don't have a fan. You have a paper plate, a cotton swab, a sponge, a napkin, a straw, a serving spoon, a fork, and ice cubes made from fruit juice. How can you cool down the soup without altering the taste?	Yes	unconventional	Step1: Use the serving spoon to stir the soup, this will help to disperse the heat.<br> Step2: Use the napkin to cover the bowl of soup, which can help to absorb some heat.<br> Step3: Hold the paper plate as a makeshift fan to blow air onto the soup to cool it down.<br> Step4: Use the cotton swab to occasionally test the temperature of the soup to avoid burning your mouth.	infeasible
1041	You want to make a long, winding track in the snow for your RC car, but all you have is a kettle, a slide projector, a barbecue brush, and a garden hose, along with a kitchen pot and a vacuum cleaner. Unfortunately, the garden hose is frozen solid, the barbecue brush bristles are too soft, the kettle is too hot to hold and the vacuum cleaner only has a sucking function, not a blow feature. How ca…	Yes	unconventional	Step1: Fill the kitchen pot with snow. Step2: Use the slide projector to heat the pot from a distance, melting the snow into water. Step3: Pour the water from the pot onto the snow in the shape of the track. Step4: Wait for the water to freeze, creating a smooth, icy track for the RC car. Tools used: Pot, Slide Projector.	infeasible
1043	You intend to create a snow maze in your back yard but have no shovel. All you have is a grill grating, a leaf blower, a tarp, some tomato stakes, and a metal rake along with a yoga mat. Sadly, the tarp is torn, the grill grating is too heavy to lift and move around, the leaf blower has a very low power setting and the metal rake is rusted. How can you construct the maze with the items you have?	Yes	unconventional	Step1: Use the tomato stakes to mark the outline of the maze. Step2: Use the low power leaf blower to slowly move snow from within the marked area, creating paths. Step3: Use the rusted metal rake to break up and move heavier snow deposits. Step4: Use the yoga mat to kneel on so you don't get too cold while working.	infeasible
1044	Your project for a science fair involves creating a pendulum, but you don't have a string or thread. You have a piece of chalk, a ruler, an apple, a long strand of spaghetti, a roll of masking tape, an eraser, and a cotton thread. Unfortunately, the spaghetti is already broken into pieces, the masking tape doesn't stick well to the ruler, the eraser is too large, and the cotton thread is too shor…	Yes	conventional	Step1: Carve a groove at one end of the ruler using the piece of chalk to help the masking tape stick better. <br> Step2: Stick the broken pieces of spaghetti together end-to-end using the masking tape until you have a strand long enough.<br> Step3: Attach one end of the spaghetti strand to the ruler using masking tape.<br> Step4: Stick the apple to the other end of the spaghetti strand using mor…	infeasible
1045	You need to make a model volcano for the science fair but you don't have any construction paper or cardboard. You do have a roll of aluminum foil, an old football, some old CD’s, a handful of toothpicks, some clay dough, and a roll of twine. Unfortunately, the clay dough is too watery to hold its shape, the toothpicks are much too short, the old CD’s are cracked and the twine is too thin. How can…	Yes	unconventional	Step1: Use the deflated football as the base of the volcano. <br> Step2: Cover the football with the aluminum foil to create the volcano's structure. <br> Step3: Use the clay dough to create the lava, despite it being watery it can depict a lava flow. <br> Note: The rest of the items are unusable due to their conditions and properties, but the football, aluminum foil, and clay dough can create a …	infeasible
1046	You are at the science fair and notice that your poster is not hanging straight because one corner has come unstuck. You don't have any more sticky tape or thumbtacks. However, you have a stapler, a pencil, a paperclip, a straw wrapper, a piece of chewing gum, and a rubber band. Unfortunately, the chewing gum is sugar-free and does not stick properly, the pencil is too small, the rubber band has …	Yes	unconventional	Step1: Unfold the paperclip to make a hook on one end and a point on the other. <br> Step2: Pierce the pointed end through the corner of the poster that has come unstuck.<br> Step3: Insert the hooked end of the paperclip into the straw wrapper to reinforce it and prevent it from tearing through the poster. <br> Step4: Attach the reinforced paperclip to the display board. This will hold the corner…	inefficient
1051	You need a magnifying glass for your school science fair project to show small details of botanical samples, but you’ve forgotten yours. You have a paperclip, a balloon that is already inflated with air and has a tiny hole in it, some plastic wrap, a rubber band, some water, a cardboard and cookies. How can you create a makeshift magnifying glass with these items?	Yes	unconventional	Step1: Unfold the paperclip and poke a small hole in the center of the balloon to release the air slowly. <br> Step2: Once deflated, cut a small piece of the balloon's rubber and stretch it over the opening of the paperclip, securing it with the rubber band.<br> Step3: Pour little water onto the stretched rubber to form a droplet. <br> Step4: Hold the paperclip with the water droplet above your s…	infeasible
1052	You have to present a science fair project on sound waves but don't have a speaker. You have a cardboard tube, a paper plate, an empty coffee cup with a hole in the bottom, a Bluetooth phone with music, a stopper, a flashlight, and a roll of tinfoil. How can you demonstrate sound amplification using these items?	Yes	unconventional	Step1: Cover one end of the cardboard tube with the tinfoil and secure it with the stopper. <br> Step2: Place the phone with the speaker facing the tube and start playing music. <br> Step3: Hold the paper plate at the open end of the tube. <br> The tube amplifies the sound from the phone, and the plate acts as a diaphragm, further amplifying the sound. The cup is not used.	inefficient
1053	You need to groom your dog's thick fur, but you don't have a pet brush or comb. Available tools include a toothpick, a cotton bath towel, a pencil sharpener, a wide toothed comb for humans which is broken in such a way that it might damage the dog's skin if used, a plastic fork, a shoe brush, a hair straightener, a pack of rubber bands, a pair of tweezers and an office stapler. How to groom your …	Yes	conventional	Step1: Use the cotton bath towel to gently rub down the dog's fur. This will help remove loose hairs and dirt. <br> Step2: Carefully use the shoe brush. Its bristles are typically soft enough to not hurt the dog but stiff enough to effectively groom the fur. Brush in the direction of hair growth to avoid discomfort.<br> Note: Be sure to avoid using the broken comb, hair straightener, and other po…	efficient
1054	Your small dog can't reach her food and water bowls which are somehow fixed on a higher platform. Tools you've at your disposal include a bathroom mat, an inflatable toy, a measuring tape, a flat stepping stool, two strong shoe boxes with broken bottoms, a large potted plant, yoga blocks, and a large book. How do you make these items work to help your dog reach her bowls?	Yes	unconventional	Step1: Place the flat stepping stool near the platform with the food and water bowls.<br> Step2: Stack the two shoe boxes on top of each other and place them on the stool for added height.<br> Step3: Use the yoga blocks for stability by placing them around the boxes on the stool.<br> Step4: Lay the bathroom mat on top of the boxes to provide a sturdy and comfortable surface for the dog.	inefficient
1055	Your dog loves to fetch, but you lost the usual dog toy. Available items include: an old phone case, a rolled-up newspaper, a tennis ball that is broken and falls apart when thrown, a rubber spatula, a squirt water bottle, a roll of duct tape, a pair of socks with large holes, a pile of dry leaves, a clothes hanger, and an air-filled balloon. How can you create a fetch toy using these items?	Yes	unconventional	Step1: Take the pair of socks with large holes.<br> Step2: Stuff the socks with dry leaves.<br> Step3: Wrap the stuffed socks tightly with duct tape to create a ball-like fetch toy.<br> Tools used: Pair of socks with large holes, pile of dry leaves and a roll of duct tape.	inefficient
1056	You have to transport your dog in the car, but you have misplaced the dog seat cover & harness. Available tools: a cushion, a carabiner, a hand vacuum, a waste bag dispenser, a backpack, two broken yoga straps, a beach towel that is too small to cover the whole seat, a few books, a scarf, and a water bottle. How can you create a makeshift dog travel kit using only these items?	Yes	unconventional	Step1: Use the cushion as a seat for the dog.<br> Step2: Use broken yoga straps and carabiner to create a makeshift harness.<br> Step3: Use the beach towel to cover part of the seat and catch any loose hairs.<br> Step4: Use the backpack to store the water bottle, waste bag dispenser, and hand vacuum.<br> Step5: Use the books to create a barrier on the side of the seat to prevent the dog from movi…	inefficient
1057	You want to train your dog to stop barking at the door, but you don't have a dog whistle. Available tools include a roll of aluminum foil, a children's toy whistle whose batteries are dead, a bell, a stapler, a hat, a set of keys, a harmonica, a smartphone whose speaker is broken and doesn't emit any sound, and a watch with an alarm. How can you train your dog to stop barking using these items?	Yes	conventional	Step1: Use the bell or harmonica to make noise every time the dog barks at the door. This noise will serve as a distraction and eventually a deterrent. <br> Step2: Reward the dog when it stops barking (you can use a treat or praise). <br> Step3: Repeat this consistently until the dog associates barking at the door with the unpleasant noise and stops the behavior.	efficient
1058	Your dog hurt her paw and you have to provide basic first aid, but you ran out of pet-friendly anti-septic cream. Available tools: a roll of gift wrap, a clean piece of cloth, an eraser, a bandage, a roll of cling film, salt, an old bathtub plug, tweezers, lack of access to fresh water, a hair dryer, and an empty honey jar. How do you take care of your dog's paw wound using these items?	Yes	conventional	Step1: Use tweezers to carefully remove any debris in the wound. <br> Step2: Dissolve some salt in your own saliva and apply it to the wound as a makeshift antiseptic.<br> Step3: Dry the wound gently with a piece of cloth.<br> Step4: Use the bandage to wrap the wound, securing it with the cling film to keep it clean and dry. <br> Step5: Monitor the wound closely until you can get pet-friendly ant…	inefficient
1059	You need a secure area to keep your puppy during training sessions, but the playpen is broken. Available tools: a large picture frame, a small bookshelf full of books that you can't empty, a roll of thick ribbon, a laundry basket on wheels, a high-backed chair, a box of envelopes, several large cushions, a broom, and a heavy blanket. How do you create a makeshift puppy area with these items?	Yes	unconventional	Step1: Use the high-backed chair and the small bookshelf as two walls of the puppy area. Step2: Lay the large picture frame flat on the ground between the chair and bookshelf, creating a third wall. Step3: Use the laundry basket on wheels as the fourth wall, moving it into place as needed. Step4: Spread the heavy blanket on the floor inside the area for the puppy to sit on. Make sure the walls ar…	infeasible
1062	You need to transplant a small tree, but you have no shovel. Available tools include a broom, a bucket, an umbrella, a dustpan, a rake, a barbecue spatula, a pair of scissors, and a pair of gardening gloves. The soil around the tree is too hard for the barbecue spatula to penetrate. How to transplant the tree using only these items?	Yes	unconventional	Step1: Use the umbrella to dig around the tree. It should be sturdy enough to penetrate the hard soil.<br> Step2: Carefully lift the tree out of the hole using the umbrella and your gloved hands, making sure to keep the root ball intact.<br> Step3: Place the tree in the bucket, trying to keep the root ball undisturbed.<br> Step4: Use the dustpan to collect soil, and then pour it into the bucket t…	inefficient
1063	You want to grow your own seedlings, but you don't have small pots. Tools available include a cup, a spoon, a marker, a roll of plastic wrap, a small kitchen knife, a pair of scissors, an egg carton, a plate, and a bottle of water. The seeds need to be planted very deep, deeper than the wells in an egg carton. How can you grow seedlings using only these items?	Yes	unconventional	Step1: Cut the egg carton in half using the scissors. <br> Step2: Use the kitchen knife to cut the bottom of the cup off. <br> Step3: Place the cut cup into one half of the egg carton. <br> Step4: Use the spoon to fill the cup with soil. <br> Step5: Plant the seeds using the spoon. <br> Step6: Water the seeds using the bottle of water. <br> Step7: Write the name of the seeds on the egg carton wit…	infeasible
1066	A hen's egg has rolled into a hard-to-reach corner of the chicken coop. Tools available to you include a rubber boot, a hoe, a woolen scarf, a rope, a large bucket, a small tin can, an old broomstick, a bag of grain, and a metal rake. The rubber boot is torn and can't hold the egg securely. How do you retrieve the egg using only these items?	Yes	conventional	Step1: Use the hoe to pull the broomstick towards you.<br> Step2: Attach the woolen scarf to the end of the broomstick.<br> Step3: Use this improvised tool to gently sweep the egg into the large bucket.	inefficient
1067	You realize that a rabbit from your petting zoo has escaped its cage and is behind a large stack of hay bales. You're unable to move the hay bales, and you have a broom, a rake, a shovel, a stick, a small cage, a hose pipe, a pair of rubber gloves, an umbrella, and a carrot at your disposal. The rabbit is scared of people and won't approach if anyone is nearby. How can you retrieve the rabbit usi…	Yes	unconventional	Step1: Put on the rubber gloves to prevent the rabbit from smelling human scent.<br> Step2: Place the small cage near the stack of hay bales.<br> Step3: Place the carrot inside the cage to lure the rabbit.<br> Step4: Move away from the cage and wait for the rabbit to enter the cage to eat the carrot.<br> Step5: Once the rabbit is inside the cage, approach quietly and close the cage door.	inefficient
[truncated: 1,145 more rows]
